# Supplementary material for: An Aggressive Subtype of Stage I Lung Adenocarcinoma with Molecular and Prognostic Characteristics Typical of Advanced Lung Cancers
Source: Oxford University Press journal article supplement (doi:10.1158/1078-0432.ccr-15-3005), 2016-06-29
Supplement: 10780432ccr153005-sup-159528_1_supp_3489278_h70mcw.xlsx [file 10780432ccr153005-sup-159528_1_supp_3489278_h70mcw.xlsx]

## Sheet: Supplemental Table 5
Tumor_Sample_Barcode	Cluster_ID	GEX_DATA	MUT_DATA	CNV_DATA	METH_DATA	PROTEIN_DATA	sample_type	gender	race	ethnicity	prior_dx	anatomic_neoplasm_subdivision	histological_type	year_of_initial_pathologic_diagnosis	residual_tumor	system_version	pathologic_T	pathologic_N	pathologic_M	pathologic_stage	vital_status	tobacco_smoking_history_indicator	number_pack_years_smoked	days_to_last_followup	days_to_death	age_at_initial_pathologic_diagnosis	patient_id	tumor_status
TCGA-35-3615-01A	C4	Y	Y	Y	N	Y	Primary Tumor	MALE	WHITE	NOT HISPANIC OR LATINO	No	R-Upper	Lung Adenocarcinoma- Not Otherwise Specified (NOS)	2007	R0	[Not Available]	T2	N0	M0	Stage IB	Alive	Lifelong Non-smoker	[Not Available]	14		57	3615	TUMOR FREE
TCGA-44-2655-01A	C3	Y	Y	Y	N	N	Primary Tumor	FEMALE	WHITE	NOT HISPANIC OR LATINO	Yes	R-Upper	Lung Adenocarcinoma- Not Otherwise Specified (NOS)	2009	R0	6th	T1	N0	M0	Stage IA	Alive	Current reformed smoker for > 15 years	30	575		65	2655	TUMOR FREE
TCGA-44-2656-01A	C4	Y	Y	Y	Y	Y	Primary Tumor	MALE	WHITE	NOT HISPANIC OR LATINO	No	R-Upper	Lung Adenocarcinoma- Not Otherwise Specified (NOS)	2009	[Not Available]	6th	T2	N0	M0	Stage IB	Alive	Current reformed smoker for < or = 15 years	23	582		59	2656	TUMOR FREE
TCGA-44-2659-01A	C4	Y	Y	Y	N	N	Primary Tumor	FEMALE	WHITE	NOT HISPANIC OR LATINO	No	L-Upper	Lung Adenocarcinoma- Not Otherwise Specified (NOS)	2009	R0	6th	T1	N1	M0	Stage IIB	Alive	Current reformed smoker for < or = 15 years	57	529		65	2659	TUMOR FREE
TCGA-44-2662-01A	C2	Y	Y	Y	N	N	Primary Tumor	MALE	WHITE	NOT HISPANIC OR LATINO	Yes	R-Upper	Lung Adenocarcinoma- Not Otherwise Specified (NOS)	2009	R0	6th	T2	N0	M0	Stage IB	Alive	Current reformed smoker for > 15 years	56	480		65	2662	TUMOR FREE
TCGA-44-2665-01A	C2	Y	Y	Y	N	Y	Primary Tumor	FEMALE	WHITE	NOT HISPANIC OR LATINO	No	R-Upper	Lung Adenocarcinoma- Not Otherwise Specified (NOS)	2009	R0	6th	T2	N1	M0	Stage IIB	Alive	Lifelong Non-smoker	[Not Available]	400		55	2665	TUMOR FREE
TCGA-44-2666-01A	C1	Y	Y	Y	Y	N	Primary Tumor	MALE	WHITE	HISPANIC OR LATINO	No	R-Upper	Lung Adenocarcinoma- Not Otherwise Specified (NOS)	2009	R0	6th	T2	N0	M0	Stage IB	Dead	Current smoker	30	97	97	43	2666	WITH TUMOR
TCGA-44-2668-01A	C1	Y	Y	Y	Y	Y	Primary Tumor	MALE	WHITE	NOT HISPANIC OR LATINO	No	R-Upper	Lung Adenocarcinoma- Not Otherwise Specified (NOS)	2009	R0	6th	T2	N0	M0	Stage IB	Alive	Current reformed smoker for < or = 15 years	60	246		51	2668	TUMOR FREE
TCGA-44-3919-01A	C3	Y	Y	Y	N	Y	Primary Tumor	FEMALE	WHITE	NOT HISPANIC OR LATINO	No	R-Upper	Lung Adenocarcinoma- Not Otherwise Specified (NOS)	2010	R0	7th	T1	N0	M0	Stage IA	Alive	Lifelong Non-smoker	[Not Available]	190		71	3919	TUMOR FREE
TCGA-44-4112-01A	C1	Y	Y	Y	N	Y	Primary Tumor	FEMALE	WHITE	NOT HISPANIC OR LATINO	No	R-Upper	Lung Adenocarcinoma- Not Otherwise Specified (NOS)	2010	R0	6th	T2a	N0	M0	Stage IB	Alive	Current reformed smoker for > 15 years	30	141		60	4112	[Not Available]
TCGA-55-1592-01A	C1	Y	Y	Y	N	Y	Primary Tumor	MALE	WHITE	NOT HISPANIC OR LATINO	Yes	L-Upper	Lung Adenocarcinoma- Not Otherwise Specified (NOS)	2005	R0	[Not Available]	T2	N0	M0	Stage IA	Dead	Current reformed smoker for < or = 15 years	[Not Available]	701	701	65	1592	WITH TUMOR
TCGA-55-1594-01A	C1	Y	Y	Y	N	Y	Primary Tumor	MALE	WHITE	NOT HISPANIC OR LATINO	No	R-Lower	Lung Adenocarcinoma- Not Otherwise Specified (NOS)	2005	R0	[Not Available]	T2	N2	M0	Stage IIIA	Alive	Current smoker	[Not Available]	1178		68	1594	TUMOR FREE
TCGA-55-1596-01A	C1	Y	Y	Y	N	Y	Primary Tumor	MALE	ASIAN	NOT HISPANIC OR LATINO	No	R-Upper	Lung Adenocarcinoma- Not Otherwise Specified (NOS)	2004	R0	[Not Available]	T2	N1	M0	Stage IIB	Alive	Current smoker	50	1375		55	1596	TUMOR FREE
TCGA-64-1676-01A	C4	Y	Y	Y	N	Y	Primary Tumor	MALE	WHITE	NOT HISPANIC OR LATINO	No	R-Lower	Lung Adenocarcinoma- Not Otherwise Specified (NOS)	2005	R0	[Not Available]	T1a	N0	M0	Stage IA	Alive	Current smoker	60	1728		58	1676	TUMOR FREE
TCGA-64-1680-01A	C4	Y	Y	Y	N	Y	Primary Tumor	MALE	WHITE	NOT HISPANIC OR LATINO	No	R-Middle	Lung Adenocarcinoma Mixed Subtype	2007	R0	6th	T2a	N2	M1	Stage IV	Alive	Current reformed smoker for > 15 years	50	1126		63	1680	TUMOR FREE
TCGA-67-3770-01A	C4	Y	Y	Y	N	N	Primary Tumor	FEMALE	WHITE	NOT HISPANIC OR LATINO	No	R-Upper	Lung Adenocarcinoma- Not Otherwise Specified (NOS)	2009	R0	[Not Available]	T1	N0	M0	Stage IA	Alive	Current reformed smoker for > 15 years	[Not Available]	31		70	3770	TUMOR FREE
TCGA-67-3771-01A	C1	Y	Y	Y	N	Y	Primary Tumor	FEMALE	BLACK OR AFRICAN AMERICAN	NOT HISPANIC OR LATINO	No	L-Upper	Lung Adenocarcinoma- Not Otherwise Specified (NOS)	2009	R0	6th	T1	N0	M0	Stage IA	Alive	Current reformed smoker for < or = 15 years	[Not Available]	610		77	3771	TUMOR FREE
TCGA-67-3774-01A	C3	Y	Y	Y	N	N	Primary Tumor	FEMALE	WHITE	NOT HISPANIC OR LATINO	No	L-Lower	Lung Adenocarcinoma- Not Otherwise Specified (NOS)	2009	RX	6th	T2	N0	M0	Stage IB	Alive	Current reformed smoker for > 15 years	[Not Available]	385		73	3774	TUMOR FREE
TCGA-05-4244-01A	C2	Y	Y	Y	N	Y	Primary Tumor	MALE	[Not Available]	[Not Available]	No	R-Lower	Lung Adenocarcinoma- Not Otherwise Specified (NOS)	2009	RX	6th	T2	N2	M1	Stage IV	Alive	Current reformed smoker for < or = 15 years	38	0		70	4244	TUMOR FREE
TCGA-05-4249-01A	C4	Y	Y	Y	N	Y	Primary Tumor	MALE	[Not Available]	[Not Available]	No	R-Lower	Lung Adenocarcinoma- Not Otherwise Specified (NOS)	2007	R0	6th	T2	N0	M0	Stage IB	Alive	Current reformed smoker for > 15 years	52	1158		67	4249	TUMOR FREE
TCGA-05-4250-01A	C1	Y	Y	Y	N	Y	Primary Tumor	FEMALE	[Not Available]	[Not Available]	No	R-Lower	Lung Adenocarcinoma- Not Otherwise Specified (NOS)	2007	R2	6th	T3	N1	M0	Stage IIIA	Dead	Current reformed smoker for < or = 15 years	47	[Not Available]	121	79	4250	[Not Available]
TCGA-05-4382-01A	C2	Y	Y	Y	N	N	Primary Tumor	MALE	[Not Available]	[Not Available]	Yes	L-Upper	Lung Adenocarcinoma Mixed Subtype	2009	R0	6th	T2	N0	M0	Stage IB	Alive	Current reformed smoker for < or = 15 years	62	607		68	4382	TUMOR FREE
TCGA-05-4384-01A	C3	Y	Y	Y	Y	Y	Primary Tumor	MALE	[Not Available]	[Not Available]	Yes	R-Lower	Lung Adenocarcinoma Mixed Subtype	2009	RX	6th	T2	N2	M0	Stage IIIA	Alive	Current reformed smoker for > 15 years	20	426		66	4384	[Not Available]
TCGA-05-4389-01A	C1	Y	Y	Y	N	N	Primary Tumor	MALE	[Not Available]	[Not Available]	No	R-Upper	Lung Adenocarcinoma Mixed Subtype	2005	R0	5th	T1	N0	M0	Stage IA	Alive	Current reformed smoker for > 15 years	43	1369		70	4389	TUMOR FREE
TCGA-05-4390-01A	C2	Y	Y	Y	Y	N	Primary Tumor	FEMALE	[Not Available]	[Not Available]	No	R-Upper	Lung Adenocarcinoma Mixed Subtype	2005	R0	5th	T2	N0	M0	Stage IB	Alive	Current reformed smoker for < or = 15 years	15	1126		58	4390	TUMOR FREE
TCGA-05-4395-01A	C1	Y	Y	Y	N	N	Primary Tumor	MALE	[Not Available]	[Not Available]	No	L-Upper	Lung Adenocarcinoma Mixed Subtype	2006	R0	5th	T4	N2	M0	Stage IIIB	Dead	Current reformed smoker for > 15 years	[Not Available]	[Not Available]	0	76	4395	TUMOR FREE
TCGA-05-4396-01A	C4	Y	Y	Y	Y	Y	Primary Tumor	MALE	[Not Available]	[Not Available]	Yes	R-Lower	Lung Adenocarcinoma Mixed Subtype	2006	R0	5th	T4	N1	M0	Stage IIIB	Dead	Current reformed smoker for > 15 years	19	[Not Available]	303	76	4396	[Not Available]
TCGA-05-4397-01A	C2	Y	Y	Y	N	Y	Primary Tumor	MALE	[Not Available]	[Not Available]	No	R-Middle	Lung Adenocarcinoma Mixed Subtype	2006	R0	5th	T2	N1	M0	Stage IIB	Dead	Current smoker	45	[Not Available]	731	65	4397	[Not Available]
TCGA-05-4398-01A	C2	Y	Y	Y	N	Y	Primary Tumor	FEMALE	[Not Available]	[Not Available]	No	R-Upper	Lung Adenocarcinoma Mixed Subtype	2006	R0	5th	T4	N3	M0	Stage IIIB	Alive	Current smoker	72	1431		47	4398	TUMOR FREE
TCGA-05-4402-01A	C3	Y	Y	Y	N	Y	Primary Tumor	FEMALE	[Not Available]	[Not Available]	Yes	R-Lower	Lung Adenocarcinoma Mixed Subtype	2007	R2	6th	T2	NX	M1	Stage IV	Dead	Lifelong Non-smoker	[Not Available]	[Not Available]	244	57	4402	TUMOR FREE
TCGA-05-4403-01A	C1	Y	Y	Y	N	N	Primary Tumor	MALE	[Not Available]	[Not Available]	No	R-Upper	Lung Adenocarcinoma Mixed Subtype	2006	R0	5th	T2	N0	M0	Stage IB	Alive	Current reformed smoker for > 15 years	[Not Available]	578		76	4403	[Not Available]
TCGA-05-4405-01A	C4	Y	Y	Y	Y	Y	Primary Tumor	FEMALE	[Not Available]	[Not Available]	Yes	R-Lower	Lung Adenocarcinoma Mixed Subtype	2006	R0	5th	T2	N0	M0	Stage IB	Alive	Current reformed smoker for < or = 15 years	65	610		74	4405	TUMOR FREE
TCGA-05-4410-01A	C4	Y	Y	Y	Y	Y	Primary Tumor	MALE	[Not Available]	[Not Available]	Yes	L-Upper	Lung Adenocarcinoma Mixed Subtype	2007	RX	6th	T2	N0	M0	Stage IB	Alive	Current reformed smoker for < or = 15 years	98	0		62	4410	[Not Available]
TCGA-05-4415-01A	C2	Y	Y	Y	Y	N	Primary Tumor	MALE	[Not Available]	[Not Available]	No	L-Lower	Lung Adenocarcinoma Mixed Subtype	2008	R0	6th	T4	N2	M0	Stage IIIB	Dead	Current reformed smoker for < or = 15 years	29	[Not Available]	91	57	4415	WITH TUMOR
TCGA-05-4417-01A	C4	Y	Y	Y	Y	Y	Primary Tumor	FEMALE	[Not Available]	[Not Available]	No	R-Upper	Lung Adenocarcinoma Mixed Subtype	2008	R0	6th	T2	N0	M0	Stage IB	Alive	Current reformed smoker for < or = 15 years	56	455		51	4417	TUMOR FREE
TCGA-05-4418-01A	C1	Y	Y	Y	N	Y	Primary Tumor	MALE	[Not Available]	[Not Available]	Yes	L-Lower	Lung Adenocarcinoma Mixed Subtype	2008	R0	6th	T3	N2	M0	Stage IIIA	Dead	Current smoker	25	[Not Available]	274	69	4418	[Not Available]
TCGA-05-4420-01A	C2	Y	Y	Y	N	Y	Primary Tumor	MALE	[Not Available]	[Not Available]	No	R-Lower	Lung Adenocarcinoma Mixed Subtype	2008	R0	6th	T2	N0	M0	Stage IB	Alive	Current smoker	38	912		41	4420	TUMOR FREE
TCGA-05-4422-01A	C2	Y	Y	Y	N	Y	Primary Tumor	MALE	[Not Available]	[Not Available]	No	L-Lower	Lung Adenocarcinoma Mixed Subtype	2008	R0	6th	T2	N0	M0	Stage IB	Alive	Current reformed smoker for < or = 15 years	147	365		68	4422	[Not Available]
TCGA-05-4424-01A	C2	Y	Y	Y	Y	N	Primary Tumor	MALE	[Not Available]	[Not Available]	No	R-Upper	Lung Adenocarcinoma Mixed Subtype	2008	R1	6th	T3	N0	M0	Stage IIB	Alive	Current reformed smoker for < or = 15 years	50	913		70	4424	WITH TUMOR
TCGA-05-4426-01A	C2	Y	Y	Y	N	Y	Primary Tumor	MALE	[Not Available]	[Not Available]	No	L-Lower	Lung Adenocarcinoma Mixed Subtype	2008	R0	6th	T2	N0	M0	Stage IB	Alive	Current reformed smoker for > 15 years	20	791		71	4426	TUMOR FREE
TCGA-05-4427-01A	C2	Y	Y	Y	Y	Y	Primary Tumor	FEMALE	[Not Available]	[Not Available]	Yes	L-Upper	Lung Adenocarcinoma Mixed Subtype	2008	R0	6th	T2	N1	M0	Stage IIB	Alive	Current reformed smoker for < or = 15 years	8	791		65	4427	TUMOR FREE
TCGA-05-4430-01A	C4	Y	Y	Y	N	Y	Primary Tumor	FEMALE	[Not Available]	[Not Available]	No	L-Lower	Lung Adenocarcinoma Mixed Subtype	2008	R0	6th	T2	N0	M0	Stage IB	Alive	Current reformed smoker for < or = 15 years	80	761		59	4430	TUMOR FREE
TCGA-05-4432-01A	C1	Y	Y	Y	N	N	Primary Tumor	MALE	[Not Available]	[Not Available]	No	R-Upper	Lung Adenocarcinoma Mixed Subtype	2008	R0	6th	T2	N1	M0	Stage IIB	Alive	Current smoker	58	761		66	4432	TUMOR FREE
TCGA-05-4433-01A	C1	Y	Y	Y	Y	N	Primary Tumor	MALE	[Not Available]	[Not Available]	No	L-Lower	Lung Adenocarcinoma Mixed Subtype	2008	R0	6th	T2	N0	M0	Stage IB	Alive	Current reformed smoker for > 15 years	1	730		82	4433	TUMOR FREE
TCGA-05-4434-01A	C1	Y	Y	Y	N	Y	Primary Tumor	FEMALE	[Not Available]	[Not Available]	Yes	R-Lower	Lung Adenocarcinoma Mixed Subtype	2008	R2	6th	T4	N1	M1	Stage IV	Dead	Current smoker	15	[Not Available]	457	67	4434	[Not Available]
TCGA-05-5420-01A	C1	Y	Y	Y	Y	Y	Primary Tumor	MALE	[Not Available]	[Not Available]	Yes	L-Upper	Lung Adenocarcinoma- Not Otherwise Specified (NOS)	2008	R0	6th	T2	N2	M0	Stage IIIA	Alive	Current reformed smoker for < or = 15 years	40	31		67	5420	TUMOR FREE
TCGA-05-5423-01A	C4	Y	Y	Y	Y	Y	Primary Tumor	MALE	[Not Available]	[Not Available]	No	L-Upper	Lung Adenocarcinoma Mixed Subtype	2006	R0	6th	T2	N1	M0	Stage IIB	Alive	Current reformed smoker for > 15 years	72	151		65	5423	TUMOR FREE
TCGA-05-5425-01A	C4	Y	Y	Y	Y	Y	Primary Tumor	MALE	[Not Available]	[Not Available]	No	R-Upper	Lung Adenocarcinoma Mixed Subtype	2009	R0	7th	T2b	N1	M0	Stage IIB	Alive	Current reformed smoker for > 15 years	40	90		68	5425	TUMOR FREE
TCGA-05-5428-01A	C2	Y	Y	Y	Y	N	Primary Tumor	MALE	[Not Available]	[Not Available]	No	R-Upper	Lung Adenocarcinoma Mixed Subtype	2010	R0	7th	T1b	N1	M0	Stage IIA	Alive	Current reformed smoker for > 15 years	30	0		57	5428	TUMOR FREE
TCGA-05-5429-01A	C1	Y	Y	Y	Y	Y	Primary Tumor	MALE	[Not Available]	[Not Available]	No	L-Upper	Lung Adenocarcinoma- Not Otherwise Specified (NOS)	2010	R0	7th	T3	N2	M0	Stage IIIA	Alive	Lifelong Non-smoker	[Not Available]	30		60	5429	TUMOR FREE
TCGA-05-5715-01A	C1	Y	Y	Y	Y	Y	Primary Tumor	FEMALE	[Not Available]	[Not Available]	No	L-Upper	Lung Adenocarcinoma Mixed Subtype	2010	R0	7th	T2a	N0	M0	Stage IB	Alive	Lifelong Non-smoker	[Not Available]	62		69	5715	TUMOR FREE
TCGA-35-4122-01A	C1	Y	Y	Y	N	Y	Primary Tumor	MALE	WHITE	NOT HISPANIC OR LATINO	No	L-Upper	Lung Adenocarcinoma- Not Otherwise Specified (NOS)	2010	R0	[Not Available]	T1	N0	M0	Stage IA	Alive	Current reformed smoker for < or = 15 years	45	225		69	4122	TUMOR FREE
TCGA-35-4123-01A	C2	Y	Y	Y	N	Y	Primary Tumor	MALE	WHITE	NOT HISPANIC OR LATINO	No	R-Upper	Lung Adenocarcinoma- Not Otherwise Specified (NOS)	2010	R0	[Not Available]	T1	N0	M0	Stage IA	Alive	Current reformed smoker for < or = 15 years	20	182		38	4123	TUMOR FREE
TCGA-35-5375-01A	C1	Y	Y	Y	Y	Y	Primary Tumor	MALE	WHITE	NOT HISPANIC OR LATINO	No	L-Upper	Lung Adenocarcinoma- Not Otherwise Specified (NOS)	2010	R0	[Not Available]	T2	N2	M0	Stage IIIA	Alive	Current reformed smoker for < or = 15 years	35	264		61	5375	TUMOR FREE
TCGA-38-4625-01A	C1	Y	Y	Y	N	Y	Primary Tumor	FEMALE	WHITE	NOT HISPANIC OR LATINO	No	R-Upper	Lung Adenocarcinoma- Not Otherwise Specified (NOS)	2002	R0	5th	T2a	N0	M0	Stage IB	Alive	Current smoker	50	2973		66	4625	[Not Available]
TCGA-38-4626-01A	C4	Y	Y	Y	N	Y	Primary Tumor	FEMALE	WHITE	NOT HISPANIC OR LATINO	No	L-Upper	Lung Adenocarcinoma- Not Otherwise Specified (NOS)	2003	R0	[Not Available]	T2b	N0	M0	Stage IIA	Alive	Current smoker	40	2595		57	4626	TUMOR FREE
TCGA-38-4627-01A	C3	Y	Y	Y	N	Y	Primary Tumor	FEMALE	WHITE	NOT HISPANIC OR LATINO	No	R-Upper	Lung Adenocarcinoma- Not Otherwise Specified (NOS)	2003	R0	[Not Available]	T1b	N1	M0	Stage IIA	Dead	Current reformed smoker for < or = 15 years	[Not Available]	1147	1147	64	4627	[Not Available]
TCGA-38-4628-01A	C4	Y	Y	Y	N	N	Primary Tumor	FEMALE	WHITE	NOT HISPANIC OR LATINO	No	R-Upper	Lung Adenocarcinoma- Not Otherwise Specified (NOS)	2002	R0	[Not Available]	T2	N1	M0	Stage IIB	Dead	Lifelong Non-smoker	[Not Available]	1492	1492	65	4628	WITH TUMOR
TCGA-38-4629-01A	C1	Y	Y	Y	N	Y	Primary Tumor	MALE	WHITE	NOT HISPANIC OR LATINO	Yes	R-Upper	Lung Adenocarcinoma- Not Otherwise Specified (NOS)	2003	R0	[Not Available]	T3	N0	M0	Stage IIB	Dead	Current reformed smoker for < or = 15 years	100	864	864	68	4629	WITH TUMOR
TCGA-38-4630-01A	C1	Y	Y	Y	N	N	Primary Tumor	FEMALE	WHITE	NOT HISPANIC OR LATINO	Yes	R-Upper	Lung Papillary Adenocarcinoma	2000	R1	6th	T2	N0	M0	Stage IB	Dead	Lifelong Non-smoker	[Not Available]	1073	1073	75	4630	WITH TUMOR
TCGA-38-4631-01A	C1	Y	Y	Y	Y	N	Primary Tumor	FEMALE	WHITE	NOT HISPANIC OR LATINO	Yes	L-Upper	Lung Adenocarcinoma- Not Otherwise Specified (NOS)	1997	R0	[Not Available]	T2	N0	M0	Stage IB	Dead	Current reformed smoker for < or = 15 years	40	354	354	72	4631	WITH TUMOR
TCGA-38-4632-01A	C2	Y	Y	Y	Y	N	Primary Tumor	MALE	BLACK OR AFRICAN AMERICAN	NOT HISPANIC OR LATINO	No	L-Upper	Lung Adenocarcinoma- Not Otherwise Specified (NOS)	1998	R0	[Not Available]	T2	N1	M1	Stage IV	Dead	Current reformed smoker for < or = 15 years	10	1357	1357	42	4632	WITH TUMOR
TCGA-38-6178-01A	C4	Y	Y	Y	Y	Y	Primary Tumor	FEMALE	WHITE	NOT HISPANIC OR LATINO	Yes	L-Upper	Lung Adenocarcinoma- Not Otherwise Specified (NOS)	2010	R1	[Not Available]	T2b	N2	[Not Available]	Stage IIIA	Alive	Lifelong Non-smoker	[Not Available]	158		70	6178	WITH TUMOR
TCGA-38-7271-01A	C4	Y	Y	Y	Y	N	Primary Tumor	FEMALE	WHITE	NOT HISPANIC OR LATINO	Yes	R-Upper	Lung Adenocarcinoma- Not Otherwise Specified (NOS)	2006	R0	6th	T1	N0	M0	Stage IA	Dead	Current reformed smoker for < or = 15 years	25	[Not Available]	800	72	7271	WITH TUMOR
TCGA-38-A44F-01A	C3	Y	Y	Y	Y	N	Primary Tumor	MALE	WHITE	NOT HISPANIC OR LATINO	No	R-Upper	Lung Adenocarcinoma Mixed Subtype	2012	R0	7th	T2a	N0	M0	Stage IB	Alive	Current reformed smoker for > 15 years	12	133		80	A44F	TUMOR FREE
TCGA-44-2657-01A	C4	Y	Y	Y	N	Y	Primary Tumor	FEMALE	WHITE	NOT HISPANIC OR LATINO	No	L-Upper	Lung Adenocarcinoma- Not Otherwise Specified (NOS)	2009	R0	6th	T2	NX	M0	Stage IB	Alive	Current reformed smoker for < or = 15 years	25	400		74	2657	TUMOR FREE
TCGA-44-2661-01A	C4	Y	Y	Y	N	Y	Primary Tumor	FEMALE	WHITE	NOT HISPANIC OR LATINO	Yes	L-Upper	Lung Adenocarcinoma- Not Otherwise Specified (NOS)	2009	R0	6th	T1	N0	M0	Stage IA	Alive	Lifelong Non-smoker	[Not Available]	103		69	2661	TUMOR FREE
TCGA-44-3396-01A	C2	Y	Y	Y	N	Y	Primary Tumor	FEMALE	WHITE	NOT HISPANIC OR LATINO	No	R-Middle	Lung Adenocarcinoma- Not Otherwise Specified (NOS)	2009	R0	7th	T2	N2	M0	Stage IIIA	Alive	Current smoker	50	311		74	3396	TUMOR FREE
TCGA-44-3398-01A	C1	Y	Y	Y	N	Y	Primary Tumor	FEMALE	WHITE	NOT HISPANIC OR LATINO	No	R-Lower	Lung Adenocarcinoma- Not Otherwise Specified (NOS)	2009	R0	6th	T1b	N0	M0	Stage IA	Alive	Current reformed smoker for < or = 15 years	60	253		77	3398	TUMOR FREE
TCGA-44-3918-01A	C4	Y	Y	Y	N	Y	Primary Tumor	FEMALE	WHITE	NOT HISPANIC OR LATINO	No	L-Upper	Lung Adenocarcinoma- Not Otherwise Specified (NOS)	2010	R0	6th	T1	N0	M0	Stage IA	Alive	Current reformed smoker for > 15 years	20	197		60	3918	TUMOR FREE
TCGA-44-5643-01A	C1	Y	Y	Y	Y	Y	Primary Tumor	MALE	BLACK OR AFRICAN AMERICAN	NOT HISPANIC OR LATINO	No	R-Lower	Lung Adenocarcinoma- Not Otherwise Specified (NOS)	2010	[Not Available]	7th	T2b	N2	M0	Stage IIIA	Alive	Current smoker	20	106		53	5643	TUMOR FREE
TCGA-44-5644-01A	C2	Y	Y	Y	Y	Y	Primary Tumor	FEMALE	WHITE	NOT HISPANIC OR LATINO	No	R-Lower	Lung Adenocarcinoma- Not Otherwise Specified (NOS)	2010	[Not Available]	7th	T2a	N0	[Not Available]	Stage IB	Alive	Current smoker	17.5	498		51	5644	TUMOR FREE
TCGA-44-5645-01A	C4	Y	Y	Y	N	Y	Primary Tumor	FEMALE	BLACK OR AFRICAN AMERICAN	NOT HISPANIC OR LATINO	No	L-Upper	Lung Adenocarcinoma- Not Otherwise Specified (NOS)	2010	[Not Available]	7th	T1	NX	[Not Available]	Stage IA	Alive	Current reformed smoker for > 15 years	5	208		61	5645	TUMOR FREE
TCGA-44-6145-01A	C1	Y	Y	Y	Y	Y	Primary Tumor	FEMALE	WHITE	NOT HISPANIC OR LATINO	No	R-Upper	Lung Adenocarcinoma- Not Otherwise Specified (NOS)	2011	[Not Available]	7th	T1	N0	M0	Stage IA	Alive	Current reformed smoker for < or = 15 years	75	103		62	6145	TUMOR FREE
TCGA-44-6146-01A	C3	Y	Y	Y	N	Y	Primary Tumor	MALE	WHITE	NOT HISPANIC OR LATINO	Yes	L-Lower	Lung Mucinous Adenocarcinoma	2010	[Not Available]	7th	T3	N0	M0	Stage IIB	Alive	Current reformed smoker for > 15 years	15	302		64	6146	TUMOR FREE
TCGA-44-6147-01A	C3	Y	Y	Y	Y	Y	Primary Tumor	FEMALE	WHITE	NOT HISPANIC OR LATINO	Yes	R-Upper	Lung Adenocarcinoma- Not Otherwise Specified (NOS)	2010	[Not Available]	7th	T1b	NX	M0	Stage IA	Alive	Current reformed smoker for > 15 years	[Not Available]	236		67	6147	TUMOR FREE
TCGA-44-6148-01A	C4	Y	Y	Y	Y	Y	Primary Tumor	MALE	WHITE	NOT HISPANIC OR LATINO	No	L-Lower	Lung Mucinous Adenocarcinoma	2011	RX	7th	T1b	N0	M0	Stage IA	Alive	Current reformed smoker for > 15 years	60	96		60	6148	TUMOR FREE
TCGA-44-6774-01A	C2	Y	Y	Y	Y	Y	Primary Tumor	FEMALE	WHITE	NOT HISPANIC OR LATINO	No	L-Lower	Lung Adenocarcinoma- Not Otherwise Specified (NOS)	2011	[Not Available]	7th	T1	N2	M0	Stage IIIA	Alive	Current smoker	20	166		56	6774	[Not Available]
TCGA-44-6775-01A	C4	Y	Y	Y	Y	Y	Primary Tumor	FEMALE	WHITE	HISPANIC OR LATINO	No	R-Upper	Lung Adenocarcinoma- Not Otherwise Specified (NOS)	2011	RX	7th	T2a	N0	MX	Stage IB	Alive	Current reformed smoker for < or = 15 years	25	83		72	6775	[Not Available]
TCGA-44-6776-01A	C4	Y	Y	Y	Y	Y	Primary Tumor	FEMALE	WHITE	[Not Available]	Yes	R-Upper	Lung Adenocarcinoma- Not Otherwise Specified (NOS)	2005	[Not Available]	6th	T1	N0	MX	Stage IA	Alive	Current reformed smoker for < or = 15 years	45	1938		60	6776	TUMOR FREE
TCGA-44-6777-01A	C4	Y	Y	Y	Y	Y	Primary Tumor	FEMALE	WHITE	[Not Available]	No	L-Upper	Lung Adenocarcinoma- Not Otherwise Specified (NOS)	2006	[Not Available]	6th	T2	NX	MX	Stage IB	Dead	Current reformed smoker for < or = 15 years	64	[Not Available]	987	85	6777	TUMOR FREE
TCGA-44-6778-01A	C1	Y	Y	Y	Y	Y	Primary Tumor	MALE	BLACK OR AFRICAN AMERICAN	[Not Available]	No	L-Upper	Lung Adenocarcinoma- Not Otherwise Specified (NOS)	2007	[Not Available]	6th	T1	N0	MX	Stage IA	Alive	Current reformed smoker for < or = 15 years	15	1110		59	6778	TUMOR FREE
TCGA-44-6779-01A	C1	Y	Y	Y	Y	Y	Primary Tumor	FEMALE	WHITE	[Not Available]	No	L-Lower	Lung Adenocarcinoma- Not Otherwise Specified (NOS)	2008	[Not Available]	6th	T2	N1	MX	Stage IIB	Dead	Current reformed smoker for < or = 15 years	15	[Not Available]	500	50	6779	WITH TUMOR
TCGA-44-7659-01A	C4	Y	Y	Y	Y	Y	Primary Tumor	MALE	WHITE	NOT HISPANIC OR LATINO	No	L-Upper	Lung Adenocarcinoma- Not Otherwise Specified (NOS)	2010	[Not Available]	7th	T1b	N0	MX	Stage IA	Alive	Current smoker	40	299		70	7659	TUMOR FREE
TCGA-44-7660-01A	C1	Y	Y	Y	Y	Y	Primary Tumor	MALE	WHITE	NOT HISPANIC OR LATINO	No	R-Upper	Lung Adenocarcinoma- Not Otherwise Specified (NOS)	2011	[Not Available]	7th	T2	N0	MX	Stage IB	Alive	Current smoker	124	162		72	7660	TUMOR FREE
TCGA-44-7661-01A	C1	Y	Y	Y	Y	Y	Primary Tumor	FEMALE	WHITE	NOT HISPANIC OR LATINO	Yes	R-Lower	Lung Adenocarcinoma- Not Otherwise Specified (NOS)	2011	[Not Available]	7th	T2a	N0	M0	Stage IB	Alive	Current reformed smoker for > 15 years	22	153		69	7661	TUMOR FREE
TCGA-44-7662-01A	C2	Y	Y	Y	Y	Y	Primary Tumor	MALE	WHITE	NOT HISPANIC OR LATINO	No	L-Upper	Lung Adenocarcinoma- Not Otherwise Specified (NOS)	2011	[Not Available]	7th	T2a	N0	MX	Stage IB	Alive	Current smoker	50	50		61	7662	TUMOR FREE
TCGA-44-7667-01A	C1	Y	Y	Y	Y	Y	Primary Tumor	FEMALE	WHITE	NOT HISPANIC OR LATINO	No	R-Lower	Lung Adenocarcinoma- Not Otherwise Specified (NOS)	2009	[Not Available]	6th	T3	N0	MX	Stage IIB	Alive	Current smoker	50	557		49	7667	TUMOR FREE
TCGA-44-7669-01A	C1	Y	Y	Y	Y	Y	Primary Tumor	MALE	BLACK OR AFRICAN AMERICAN	NOT HISPANIC OR LATINO	No	R-Upper	Lung Adenocarcinoma- Not Otherwise Specified (NOS)	2010	[Not Available]	7th	T1b	N1	MX	Stage IIA	Dead	Current smoker	20	[Not Available]	574	59	7669	WITH TUMOR
TCGA-44-7670-01A	C1	Y	Y	Y	Y	Y	Primary Tumor	FEMALE	WHITE	HISPANIC OR LATINO	Yes	L-Upper	Lung Adenocarcinoma- Not Otherwise Specified (NOS)	2010	[Not Available]	7th	T1b	N1	M0	Stage IIA	Alive	Current smoker	30	531		47	7670	TUMOR FREE
TCGA-44-7671-01A	C3	Y	Y	Y	Y	Y	Primary Tumor	MALE	BLACK OR AFRICAN AMERICAN	NOT HISPANIC OR LATINO	Yes	[Not Available]	Lung Adenocarcinoma Mixed Subtype	2010	[Not Available]	7th	T2a	N0	M0	Stage IB	Alive	Current reformed smoker for > 15 years	[Not Available]	535		64	7671	TUMOR FREE
TCGA-44-7672-01A	C2	Y	Y	Y	Y	Y	Primary Tumor	FEMALE	WHITE	NOT HISPANIC OR LATINO	No	L-Upper	Lung Adenocarcinoma- Not Otherwise Specified (NOS)	2010	[Not Available]	7th	T1b	N0	M0	Stage IA	Alive	Current smoker	20	418		52	7672	TUMOR FREE
TCGA-44-8117-01A	C2	Y	Y	Y	Y	N	Primary Tumor	FEMALE	WHITE	NOT HISPANIC OR LATINO	No	R-Upper	Lung Adenocarcinoma- Not Otherwise Specified (NOS)	2011	[Not Available]	7th	T2a	N0	M0	Stage IB	Alive	Current reformed smoker for < or = 15 years	54	259		54	8117	TUMOR FREE
TCGA-44-8119-01A	C1	Y	Y	Y	Y	N	Primary Tumor	MALE	WHITE	NOT HISPANIC OR LATINO	Yes, History of Prior Malignancy	R-Upper	Lung Adenocarcinoma- Not Otherwise Specified (NOS)	2012	[Not Available]	7th	T3	N0	M0	Stage IIB	Alive	Current smoker	50	99		73	8119	TUMOR FREE
TCGA-44-8120-01A	C2	Y	Y	Y	Y	N	Primary Tumor	MALE	BLACK OR AFRICAN AMERICAN	NOT HISPANIC OR LATINO	No	R-Upper	Lung Adenocarcinoma- Not Otherwise Specified (NOS)	2011	[Not Available]	7th	T2a	N0	M0	Stage IB	Alive	Current Reformed Smoker, Duration Not Specified	30	169		58	8120	TUMOR FREE
TCGA-44-A479-01A	C1	Y	Y	Y	Y	N	Primary Tumor	FEMALE	BLACK OR AFRICAN AMERICAN	NOT HISPANIC OR LATINO	No	R-Upper	Lung Adenocarcinoma- Not Otherwise Specified (NOS)	2012	R0	7th	T2	N0	MX	Stage IB	Alive	Current reformed smoker for < or = 15 years	40	256		73	A479	TUMOR FREE
TCGA-44-A47A-01A	C2	Y	Y	Y	Y	N	Primary Tumor	FEMALE	WHITE	NOT HISPANIC OR LATINO	No	R-Upper	Lung Adenocarcinoma- Not Otherwise Specified (NOS)	2012	R0	7th	T2a	N0	MX	Stage IB	Alive	Current reformed smoker for < or = 15 years	80	202		78	A47A	TUMOR FREE
TCGA-44-A47B-01A	C2	Y	Y	Y	Y	N	Primary Tumor	MALE	WHITE	NOT HISPANIC OR LATINO	No	R-Upper	Lung Adenocarcinoma- Not Otherwise Specified (NOS)	2012	R0	7th	T2a	N0	M0	Stage IB	Alive	Current reformed smoker for > 15 years	4.5	105		79	A47B	TUMOR FREE
TCGA-44-A47G-01A	C3	Y	Y	Y	Y	N	Primary Tumor	FEMALE	WHITE	NOT HISPANIC OR LATINO	No	R-Upper	Lung Adenocarcinoma- Not Otherwise Specified (NOS)	2012	R0	7th	T1	N0	M0	Stage IA	Alive	Current reformed smoker for < or = 15 years	28	135		73	A47G	TUMOR FREE
TCGA-44-A4SS-01A	C1	Y	Y	Y	Y	N	Primary Tumor	MALE	WHITE	NOT HISPANIC OR LATINO	No	L-Upper	Lung Adenocarcinoma- Not Otherwise Specified (NOS)	2012	[Not Available]	7th	T1b	N0	M0	Stage IA	Alive	Current reformed smoker for < or = 15 years	90	114		73	A4SS	TUMOR FREE
TCGA-44-A4SU-01A	C4	Y	Y	Y	Y	N	Primary Tumor	FEMALE	WHITE	NOT HISPANIC OR LATINO	No	R-Lower	Lung Adenocarcinoma- Not Otherwise Specified (NOS)	2012	R0	7th	T1a	N0	MX	Stage IA	Alive	Current reformed smoker for < or = 15 years	50	76		67	A4SU	TUMOR FREE
TCGA-49-4486-01A	C4	Y	Y	Y	N	Y	Primary Tumor	MALE	WHITE	NOT HISPANIC OR LATINO	No	R-Lower	Lung Adenocarcinoma- Not Otherwise Specified (NOS)	1992	R0	[Not Available]	T1	N0	M0	Stage IA	Dead	Current reformed smoker for > 15 years	17.5	2318	2318	72	4486	WITH TUMOR
TCGA-49-4487-01A	C1	Y	Y	Y	Y	Y	Primary Tumor	FEMALE	WHITE	NOT HISPANIC OR LATINO	No	L-Upper	Lung Adenocarcinoma- Not Otherwise Specified (NOS)	1992	R0	3rd	T1	N0	M0	Stage IA	Dead	Current reformed smoker for < or = 15 years	40	[Not Available]	855	72	4487	WITH TUMOR
TCGA-49-4488-01A	C2	Y	Y	Y	Y	Y	Primary Tumor	FEMALE	WHITE	NOT HISPANIC OR LATINO	No	L-Lower	Lung Adenocarcinoma- Not Otherwise Specified (NOS)	1992	R0	3rd	T1	N0	MX	Stage IA	Dead	Current reformed smoker for > 15 years	[Not Available]	[Not Available]	869	74	4488	[Not Available]
TCGA-49-4490-01A	C3	Y	Y	Y	Y	N	Primary Tumor	FEMALE	WHITE	NOT HISPANIC OR LATINO	No	L-Upper	Lung Adenocarcinoma- Not Otherwise Specified (NOS)	1993	[Not Available]	4th	T3	N2	M0	Stage IIIA	Dead	Current reformed smoker for > 15 years	5	[Not Available]	385	45	4490	[Not Available]
TCGA-49-4494-01A	C3	Y	Y	Y	N	Y	Primary Tumor	MALE	WHITE	NOT HISPANIC OR LATINO	No	L-Upper	Lung Adenocarcinoma- Not Otherwise Specified (NOS)	1995	R0	[Not Available]	T3	N2	M0	Stage IIIA	Dead	Current reformed smoker for > 15 years	50	1081	1081	77	4494	WITH TUMOR
TCGA-49-4501-01A	C4	Y	Y	Y	N	Y	Primary Tumor	FEMALE	WHITE	NOT HISPANIC OR LATINO	Yes	R-Upper	Lung Adenocarcinoma- Not Otherwise Specified (NOS)	1996	R0	[Not Available]	T2	N0	M0	Stage IB	Dead	Lifelong Non-smoker	[Not Available]	1421	1421	67	4501	WITH TUMOR
TCGA-49-4505-01A	C4	Y	Y	Y	N	Y	Primary Tumor	FEMALE	WHITE	NOT HISPANIC OR LATINO	No	R-Lower	Lung Adenocarcinoma- Not Otherwise Specified (NOS)	1996	R0	4th	T2	N1	M0	Stage IIB	Dead	Current reformed smoker for < or = 15 years	74	428	428	61	4505	WITH TUMOR
TCGA-49-4506-01A	C1	Y	Y	Y	N	Y	Primary Tumor	FEMALE	WHITE	NOT HISPANIC OR LATINO	No	L-Upper	Lung Adenocarcinoma- Not Otherwise Specified (NOS)	1997	R1	7th	T2	N1	M0	Stage IIB	Dead	Current smoker	100	999	999	68	4506	WITH TUMOR
TCGA-49-4507-01A	C1	Y	Y	Y	N	Y	Primary Tumor	FEMALE	WHITE	NOT HISPANIC OR LATINO	No	R-Middle	Lung Adenocarcinoma- Not Otherwise Specified (NOS)	1997	R0	[Not Available]	T3	N1	M0	Stage IIIA	Dead	Current reformed smoker for < or = 15 years	78	268	268	73	4507	WITH TUMOR
TCGA-49-4510-01A	C4	Y	Y	Y	N	Y	Primary Tumor	FEMALE	BLACK OR AFRICAN AMERICAN	NOT HISPANIC OR LATINO	No	L-Upper	Lung Adenocarcinoma- Not Otherwise Specified (NOS)	2001	R0	[Not Available]	T2	N1	M0	Stage IIB	Dead	Current smoker	55.5	896	896	51	4510	WITH TUMOR
TCGA-49-4512-01A	C4	Y	Y	Y	Y	Y	Primary Tumor	FEMALE	WHITE	NOT HISPANIC OR LATINO	No	R-Middle	Lung Adenocarcinoma- Not Otherwise Specified (NOS)	2007	R1	6th	T2	N2	MX	Stage IIIA	Dead	Lifelong Non-smoker	[Not Available]	157	905	69	4512	WITH TUMOR
TCGA-49-4514-01A	C1	Y	Y	Y	Y	Y	Primary Tumor	FEMALE	WHITE	[Not Available]	No	L-Upper	Lung Papillary Adenocarcinoma	2007	R0	6th	T1	N0	M0	Stage IA	Alive	Current reformed smoker for > 15 years	65	1314		79	4514	TUMOR FREE
TCGA-49-6742-01A	C1	Y	Y	Y	Y	Y	Primary Tumor	MALE	WHITE	NOT HISPANIC OR LATINO	Yes	L-Upper	Mucinous (Colloid) Carcinoma	2010	R0	7th	T2	N1	M0	Stage IIB	Alive	Current reformed smoker for > 15 years	10	445		70	6742	WITH TUMOR
TCGA-49-6743-01A	C1	Y	Y	Y	Y	Y	Primary Tumor	FEMALE	WHITE	[Not Available]	No	R-Upper	Lung Clear Cell Adenocarcinoma	2010	[Not Available]	7th	T1	N2	MX	Stage IIIA	Alive	Current reformed smoker for < or = 15 years	50	369		81	6743	[Not Available]
TCGA-49-6744-01A	C3	Y	Y	Y	Y	Y	Primary Tumor	FEMALE	WHITE	[Not Available]	No	L-Upper	Lung Adenocarcinoma Mixed Subtype	2010	R0	7th	T2a	N1	MX	Stage IIA	Alive	Current reformed smoker for < or = 15 years	20	890		64	6744	TUMOR FREE
TCGA-49-6745-01A	C1	Y	Y	Y	Y	Y	Primary Tumor	MALE	WHITE	[Not Available]	Yes	L-Upper	Lung Adenocarcinoma- Not Otherwise Specified (NOS)	2011	[Not Available]	7th	T2a	N2	M0	Stage IIIA	Alive	Current reformed smoker for < or = 15 years	20	156		82	6745	TUMOR FREE
TCGA-49-6761-01A	C2	Y	Y	Y	Y	Y	Primary Tumor	FEMALE	WHITE	NOT HISPANIC OR LATINO	Yes	R-Upper	Lung Adenocarcinoma- Not Otherwise Specified (NOS)	2009	R0	6th	T1	N2	MX	Stage IIIA	Alive	Current reformed smoker for < or = 15 years	50	1		68	6761	TUMOR FREE
TCGA-49-6767-01A	C1	Y	Y	Y	Y	Y	Primary Tumor	FEMALE	WHITE	[Not Available]	No	R-Middle	Lung Adenocarcinoma- Not Otherwise Specified (NOS)	2010	R0	7th	T3	N0	MX	Stage IIB	Alive	Current smoker	30	0		46	6767	[Not Available]
TCGA-50-5044-01A	C1	Y	Y	Y	Y	Y	Primary Tumor	FEMALE	WHITE	NOT HISPANIC OR LATINO	No	R-Lower	Lung Adenocarcinoma- Not Otherwise Specified (NOS)	2002	[Not Available]	5th	T4	N1	M0	Stage IIIB	Dead	[Not Available]	[Not Available]	[Not Available]	624	72	5044	WITH TUMOR
TCGA-50-5045-01A	C4	Y	Y	Y	Y	Y	Primary Tumor	FEMALE	BLACK OR AFRICAN AMERICAN	NOT HISPANIC OR LATINO	No	R-Lower	Lung Adenocarcinoma- Not Otherwise Specified (NOS)	2004	[Not Available]	6th	T2	N1	M0	Stage IA	Dead	[Not Available]	[Not Available]	2174	2174	57	5045	WITH TUMOR
TCGA-50-5049-01A	C4	Y	Y	Y	Y	Y	Primary Tumor	MALE	WHITE	NOT HISPANIC OR LATINO	No	R-Upper	Lung Adenocarcinoma- Not Otherwise Specified (NOS)	2006	[Not Available]	6th	T2	N0	M0	Stage IA	Alive	[Not Available]	[Not Available]	1485		70	5049	TUMOR FREE
TCGA-50-5051-01A	C4	Y	Y	Y	Y	Y	Primary Tumor	FEMALE	WHITE	NOT HISPANIC OR LATINO	No	L-Upper	Lung Adenocarcinoma- Not Otherwise Specified (NOS)	2007	R0	6th	T2	N2	M0	Stage IIIA	Alive	Current reformed smoker for < or = 15 years	30	455		42	5051	TUMOR FREE
TCGA-50-5055-01A	C4	Y	Y	Y	Y	N	Primary Tumor	FEMALE	WHITE	NOT HISPANIC OR LATINO	No	L-Lower	Lung Adenocarcinoma Mixed Subtype	2008	R0	6th	T1	N1	M0	Stage IIA	Alive	[Not Available]	[Not Available]	785		79	5055	WITH TUMOR
TCGA-50-5066-01A	C1	Y	Y	Y	Y	Y	Primary Tumor	MALE	BLACK OR AFRICAN AMERICAN	NOT HISPANIC OR LATINO	No	R-Upper	Lung Adenocarcinoma Mixed Subtype	2009	R0	6th	T2	N0	M0	Stage IB	Alive	Lifelong Non-smoker	[Not Available]	297		72	5066	[Not Available]
TCGA-50-5068-01A	C4	Y	Y	Y	Y	Y	Primary Tumor	FEMALE	WHITE	NOT HISPANIC OR LATINO	No	R-Lower	Lung Adenocarcinoma- Not Otherwise Specified (NOS)	2003	[Not Available]	6th	T2	N1	MX	Stage IIB	Dead	[Not Available]	[Not Available]	1499	1499	59	5068	WITH TUMOR
TCGA-50-5072-01A	C1	Y	Y	Y	Y	Y	Primary Tumor	MALE	WHITE	NOT HISPANIC OR LATINO	No	L-Upper	Lung Adenocarcinoma- Not Otherwise Specified (NOS)	2009	[Not Available]	6th	T2	N2	M0	Stage IIIA	Alive	Current reformed smoker for > 15 years	15	246		74	5072	WITH TUMOR
TCGA-50-5930-01A	C1	Y	Y	Y	Y	Y	Primary Tumor	MALE	WHITE	NOT HISPANIC OR LATINO	No	R-Upper	Lung Adenocarcinoma Mixed Subtype	2001	[Not Available]	5th	T2	N2	M0	Stage IIIA	Dead	[Not Available]	[Not Available]	282	282	47	5930	WITH TUMOR
TCGA-50-5931-01A	C1	Y	Y	Y	Y	Y	Primary Tumor	FEMALE	WHITE	NOT HISPANIC OR LATINO	No	L-Upper	Lung Adenocarcinoma- Not Otherwise Specified (NOS)	2001	R0	5th	T2	N0	M0	Stage IB	Dead	Current reformed smoker for < or = 15 years	40	267	434	75	5931	TUMOR FREE
TCGA-50-5932-01A	C4	Y	Y	Y	Y	Y	Primary Tumor	MALE	WHITE	NOT HISPANIC OR LATINO	Yes	R-Upper	Lung Adenocarcinoma- Not Otherwise Specified (NOS)	2001	[Not Available]	5th	T2	N1	M0	Stage IIB	Dead	[Not Available]	[Not Available]	1091	1235	75	5932	WITH TUMOR
TCGA-50-5933-01A	C1	Y	Y	Y	Y	Y	Primary Tumor	MALE	WHITE	NOT HISPANIC OR LATINO	No	L-Lower	Lung Adenocarcinoma- Not Otherwise Specified (NOS)	2001	[Not Available]	5th	T4	N2	M0	Stage IIIB	Dead	[Not Available]	[Not Available]	2370	2393	72	5933	TUMOR FREE
TCGA-50-5935-01A	C4	Y	Y	Y	Y	N	Primary Tumor	FEMALE	WHITE	NOT HISPANIC OR LATINO	Yes	L-Upper	Lung Adenocarcinoma- Not Otherwise Specified (NOS)	2006	[Not Available]	6th	T1	N0	M0	Stage IA	Dead	[Not Available]	[Not Available]	653	653	86	5935	[Not Available]
TCGA-50-5936-01A	C1	Y	Y	Y	Y	Y	Primary Tumor	MALE	WHITE	NOT HISPANIC OR LATINO	No	R-Lower	Mucinous (Colloid) Carcinoma	2007	[Not Available]	6th	T2	N2	M0	Stage IIIA	Dead	[Not Available]	[Not Available]	[Not Available]	257	58	5936	[Not Available]
TCGA-50-5939-01A	C1	Y	Y	Y	Y	Y	Primary Tumor	MALE	WHITE	NOT HISPANIC OR LATINO	No	R-Upper	Lung Adenocarcinoma Mixed Subtype	2008	[Not Available]	6th	T2	N0	M0	Stage IB	Dead	Current reformed smoker for > 15 years	15	[Not Available]	460	85	5939	TUMOR FREE
TCGA-50-5941-01A	C4	Y	Y	Y	Y	Y	Primary Tumor	FEMALE	WHITE	[Not Available]	No	R-Upper	Lung Adenocarcinoma- Not Otherwise Specified (NOS)	2010	[Not Available]	7th	T2a	N2	M0	Stage IIIA	Alive	Current smoker	25	285		55	5941	[Not Available]
TCGA-50-5942-01A	C4	Y	Y	Y	Y	Y	Primary Tumor	FEMALE	WHITE	NOT HISPANIC OR LATINO	No	R-Upper	Lung Adenocarcinoma- Not Otherwise Specified (NOS)	2009	R0	7th	T1	N0	M0	Stage IA	Alive	Current reformed smoker for < or = 15 years	30	136		67	5942	[Not Available]
TCGA-50-5944-01A	C3	Y	Y	Y	Y	Y	Primary Tumor	FEMALE	WHITE	[Not Available]	No	R-Upper	Lung Acinar Adenocarcinoma	2010	R0	7th	T1	N0	M0	Stage IA	Alive	[Not Available]	[Not Available]	373		69	5944	TUMOR FREE
TCGA-50-5946-01A	C4	Y	Y	Y	Y	Y	Primary Tumor	MALE	WHITE	[Not Available]	No	R-Upper	Lung Adenocarcinoma Mixed Subtype	2010	[Not Available]	[Not Available]	T1	N0	MX	Stage IA	Alive	Current reformed smoker for < or = 15 years	[Not Available]	349		62	5946	[Not Available]
TCGA-50-6590-01A	C1	Y	Y	Y	Y	Y	Primary Tumor	FEMALE	WHITE	NOT HISPANIC OR LATINO	No	R-Upper	Lung Adenocarcinoma- Not Otherwise Specified (NOS)	2005	[Not Available]	6th	T2	N0	M0	Stage IB	Dead	Current reformed smoker for < or = 15 years	50	[Not Available]	1288	72	6590	TUMOR FREE
TCGA-50-6591-01A	C1	Y	Y	Y	Y	Y	Primary Tumor	FEMALE	WHITE	NOT HISPANIC OR LATINO	No	L-Lower	Lung Adenocarcinoma- Not Otherwise Specified (NOS)	2007	[Not Available]	6th	T2	N0	M1	Stage IV	Dead	Lifelong Non-smoker	[Not Available]	[Not Available]	119	63	6591	WITH TUMOR
TCGA-50-6592-01A	C1	Y	Y	Y	Y	Y	Primary Tumor	FEMALE	WHITE	NOT HISPANIC OR LATINO	No	L-Lower	Lung Adenocarcinoma- Not Otherwise Specified (NOS)	2007	[Not Available]	6th	T2	N0	M0	Stage IB	Dead	Current reformed smoker for < or = 15 years	[Not Available]	[Not Available]	777	71	6592	WITH TUMOR
TCGA-50-6593-01A	C3	Y	Y	Y	Y	Y	Primary Tumor	FEMALE	WHITE	NOT HISPANIC OR LATINO	No	R-Upper	Lung Adenocarcinoma Mixed Subtype	2008	R0	6th	T1	N2	M0	Stage IIIA	Dead	Current reformed smoker for < or = 15 years	[Not Available]	[Not Available]	336	49	6593	WITH TUMOR
TCGA-50-6594-01A	C1	Y	Y	Y	Y	Y	Primary Tumor	FEMALE	BLACK OR AFRICAN AMERICAN	NOT HISPANIC OR LATINO	No	L-Upper	Lung Adenocarcinoma- Not Otherwise Specified (NOS)	2009	[Not Available]	6th	T3	N2	M0	Stage IIIA	Dead	Current reformed smoker for < or = 15 years	[Not Available]	[Not Available]	370	79	6594	WITH TUMOR
TCGA-50-6595-01A	C1	Y	Y	Y	Y	Y	Primary Tumor	FEMALE	WHITE	NOT HISPANIC OR LATINO	No	R-Upper	Lung Adenocarcinoma- Not Otherwise Specified (NOS)	2009	[Not Available]	6th	T2	N2	M0	Stage IIIA	Dead	Current reformed smoker for > 15 years	[Not Available]	[Not Available]	189	74	6595	WITH TUMOR
TCGA-50-6597-01A	C4	Y	Y	Y	Y	Y	Primary Tumor	FEMALE	WHITE	NOT HISPANIC OR LATINO	No	R-Lower	Lung Adenocarcinoma- Not Otherwise Specified (NOS)	2007	R0	6th	T2	N0	M0	Stage IB	Alive	Lifelong Non-smoker	[Not Available]	1015		79	6597	TUMOR FREE
TCGA-50-6673-01A	C1	Y	Y	Y	Y	Y	Primary Tumor	FEMALE	WHITE	[Not Available]	No	R-Upper	Lung Adenocarcinoma- Not Otherwise Specified (NOS)	2004	R0	6th	T1	N0	M0	Stage IA	Dead	Lifelong Non-smoker	[Not Available]	[Not Available]	22	84	6673	[Not Available]
TCGA-50-7109-01A	C2	Y	Y	Y	Y	Y	Primary Tumor	MALE	WHITE	NOT HISPANIC OR LATINO	No	R-Lower	Lung Adenocarcinoma- Not Otherwise Specified (NOS)	2011	[Not Available]	6th	T1	N0	MX	Stage I	Alive	Current smoker	120	255		60	7109	[Not Available]
TCGA-50-8457-01A	C4	Y	Y	Y	Y	N	Primary Tumor
TCGA-50-8459-01A	C1	Y	Y	Y	Y	N	Primary Tumor	MALE	WHITE	NOT HISPANIC OR LATINO	No	R-Lower	Mucinous (Colloid) Carcinoma	2012	[Not Available]	7th	T3	N0	M0	Stage IIB	Alive		10	231	[Not Applicable]	68	8459	TUMOR FREE
TCGA-50-8460-01A	C4	Y	Y	Y	Y	N	Primary Tumor	MALE	WHITE	NOT HISPANIC OR LATINO	No	R-Upper	Lung Papillary Adenocarcinoma	2012	R0	7th	T1a	N0	M0	Stage IA	Alive	[Unknown]	[Not Available]	105		74	8460	[Unknown]
TCGA-53-7624-01A	C1	Y	Y	Y	Y	Y	Primary Tumor	FEMALE	WHITE	HISPANIC OR LATINO	No	R-Upper	Lung Adenocarcinoma- Not Otherwise Specified (NOS)	2008	R0	6th	T2	N0	M1	Stage IV	Dead	Current smoker	50	[Not Available]	1043	40	7624	WITH TUMOR
TCGA-53-7626-01A	C4	Y	Y	Y	Y	Y	Primary Tumor	FEMALE	WHITE	NOT HISPANIC OR LATINO	No	R-Upper	Lung Adenocarcinoma- Not Otherwise Specified (NOS)	2008	R0	6th	T1	N1	M0	Stage IIA	Dead	Current reformed smoker for < or = 15 years	35	[Not Available]	929	76	7626	WITH TUMOR
TCGA-53-7813-01A	C2	Y	Y	Y	Y	Y	Primary Tumor	FEMALE	WHITE	NOT HISPANIC OR LATINO	No	R-Upper	Lung Bronchioloalveolar Carcinoma Nonmucinous	2008	[Not Available]	6th	T4	N0	M0	Stage IIIB	Alive	Current reformed smoker for < or = 15 years	35	418		51	7813	TUMOR FREE
TCGA-53-A4EZ-01A	C2	Y	Y	Y	Y	N	Primary Tumor	MALE	WHITE	HISPANIC OR LATINO	No	L-Upper	Lung Acinar Adenocarcinoma	2012	RX	7th	T2a	N1	MX	Stage IIA	Alive	Current reformed smoker for > 15 years	40	280		63	A4EZ	TUMOR FREE
TCGA-55-1595-01A	C2	Y	Y	Y	N	N	Primary Tumor	FEMALE	ASIAN	NOT HISPANIC OR LATINO	Yes	L-Lower	Lung Clear Cell Adenocarcinoma	2004	[Not Available]	[Not Available]	T1	N0	M0	Stage IA	Alive	Current reformed smoker for < or = 15 years	[Not Available]	1479		74	1595	TUMOR FREE
TCGA-55-5899-01A	C2	Y	Y	Y	Y	Y	Primary Tumor	MALE	WHITE	NOT HISPANIC OR LATINO	No	R-Upper	Lung Adenocarcinoma- Not Otherwise Specified (NOS)	2010	R0	7th	T1a	N1	M0	Stage IA	Alive	Current smoker	[Not Available]	87		58	5899	[Not Available]
TCGA-55-6543-01A	C4	Y	Y	Y	Y	Y	Primary Tumor	FEMALE	WHITE	[Not Available]	No	R-Upper	Lung Bronchioloalveolar Carcinoma Mucinous	2010	[Not Available]	7th	T1b	N0	MX	Stage IA	Alive	Current reformed smoker for < or = 15 years	60	2		60	6543	[Not Available]
TCGA-55-6642-01A	C2	Y	Y	Y	Y	N	Primary Tumor	MALE	WHITE	[Not Available]	No	R-Lower	Lung Adenocarcinoma- Not Otherwise Specified (NOS)	2006	R0	6th	T2	N0	MX	Stage IB	Alive	Current smoker	[Not Available]	993		63	6642	TUMOR FREE
TCGA-55-6712-01A	C1	Y	Y	Y	Y	Y	Primary Tumor	MALE	WHITE	[Not Available]	No	L-Upper	Lung Adenocarcinoma- Not Otherwise Specified (NOS)	2010	[Not Available]	7th	T2a	N1	MX	Stage IIA	Alive	Current reformed smoker for < or = 15 years	[Not Available]	24		71	6712	[Not Available]
TCGA-55-6968-01A	C1	Y	Y	Y	Y	N	Primary Tumor	MALE	WHITE	NOT HISPANIC OR LATINO	No	R-Lower	Lung Adenocarcinoma- Not Otherwise Specified (NOS)	2004	[Not Available]	6th	T1	N0	M1	Stage IV	Dead	Current smoker	[Not Available]	[Not Available]	1293	61	6968	WITH TUMOR
TCGA-55-6969-01A	C2	Y	Y	Y	Y	Y	Primary Tumor	MALE	WHITE	[Not Available]	No	L-Upper	Lung Adenocarcinoma- Not Otherwise Specified (NOS)	2004	[Not Available]	6th	T2	N0	M0	Stage IB	Alive	Current reformed smoker for < or = 15 years	[Not Available]	1239		52	6969	TUMOR FREE
TCGA-55-6970-01A	C1	Y	Y	Y	Y	Y	Primary Tumor	FEMALE	WHITE	[Not Available]	No	R-Upper	Lung Papillary Adenocarcinoma	2004	R1	6th	T2	N2	MX	Stage IIIA	Dead	Current reformed smoker for < or = 15 years	[Not Available]	[Not Available]	464	67	6970	WITH TUMOR
TCGA-55-6971-01A	C2	Y	Y	Y	Y	Y	Primary Tumor	FEMALE	WHITE	[Not Available]	No	L-Lower	Lung Adenocarcinoma- Not Otherwise Specified (NOS)	2010	R0	7th	T2	N0	MX	Stage IB	Alive	Current reformed smoker for < or = 15 years	60	25		59	6971	[Not Available]
TCGA-55-6972-01A	C4	Y	Y	Y	Y	N	Primary Tumor	MALE	WHITE	NOT HISPANIC OR LATINO	No	R-Upper	Lung Papillary Adenocarcinoma	2005	R0	6th	T2	N0	M0	Stage IB	Alive	Current smoker	[Not Available]	1475		72	6972	TUMOR FREE
TCGA-55-6975-01A	C1	Y	Y	Y	Y	N	Primary Tumor	MALE	WHITE	NOT HISPANIC OR LATINO	No	L-Lower	Lung Adenocarcinoma Mixed Subtype	2004	[Not Available]	6th	T2	N1	M0	Stage IIB	Dead	Current reformed smoker for < or = 15 years	[Not Available]	[Not Available]	118	61	6975	WITH TUMOR
TCGA-55-6978-01A	C1	Y	Y	Y	Y	Y	Primary Tumor	MALE	WHITE	NOT HISPANIC OR LATINO	Yes	R-Middle	Lung Adenocarcinoma- Not Otherwise Specified (NOS)	2010	[Not Available]	7th	T2b	N0	MX	Stage IIA	Dead	Lifelong Non-smoker	[Not Available]	[Not Available]	167	81	6978	WITH TUMOR
TCGA-55-6979-01A	C4	Y	Y	Y	Y	Y	Primary Tumor	FEMALE	WHITE	[Not Available]	Yes	L-Upper	Lung Adenocarcinoma- Not Otherwise Specified (NOS)	2006	[Not Available]	6th	T2	N1	M0	Stage IIB	Dead	Current reformed smoker for > 15 years	[Not Available]	[Not Available]	237	59	6979	WITH TUMOR
TCGA-55-6980-01A	C4	Y	Y	Y	Y	N	Primary Tumor	MALE	WHITE	[Not Available]	No	R-Lower	Lung Bronchioloalveolar Carcinoma Nonmucinous	2006	R0	6th	T1	N0	M0	Stage IA	Alive	Lifelong Non-smoker	[Not Available]	67		56	6980	TUMOR FREE
TCGA-55-6981-01A	C3	Y	Y	Y	Y	Y	Primary Tumor	FEMALE	WHITE	NOT HISPANIC OR LATINO	No	L-Upper	Lung Adenocarcinoma- Not Otherwise Specified (NOS)	2005	R0	6th	T1	N2	M0	Stage IIIA	Dead	Current reformed smoker for > 15 years	[Not Available]	[Not Available]	1379	53	6981	TUMOR FREE
TCGA-55-6982-01A	C4	Y	Y	Y	Y	Y	Primary Tumor	FEMALE	WHITE	[Not Available]	No	R-Lower	Lung Adenocarcinoma- Not Otherwise Specified (NOS)	2004	[Not Available]	6th	T2	N1	M0	Stage IIB	Dead	Lifelong Non-smoker	[Not Available]	[Not Available]	995	79	6982	WITH TUMOR
TCGA-55-6983-01A	C3	Y	Y	Y	Y	N	Primary Tumor	MALE	WHITE	NOT HISPANIC OR LATINO	No	L-Lower	Mucinous (Colloid) Carcinoma	2005	R0	6th	T2	N1	M0	Stage IIB	Alive	Current reformed smoker for < or = 15 years	60	1826		81	6983	TUMOR FREE
TCGA-55-6984-01A	C1	Y	Y	Y	Y	N	Primary Tumor	FEMALE	WHITE	NOT HISPANIC OR LATINO	No	L-Lower	Lung Adenocarcinoma- Not Otherwise Specified (NOS)	2006	[Not Available]	6th	T2	N1	M0	Stage IIB	Dead	[Not Available]	[Not Available]	[Not Available]	760	71	6984	WITH TUMOR
TCGA-55-6985-01A	C3	Y	Y	Y	Y	N	Primary Tumor	FEMALE	WHITE	[Not Available]	No	L-Upper	Lung Adenocarcinoma- Not Otherwise Specified (NOS)	2004	R0	6th	T2	N0	MX	Stage IB	Alive	Current reformed smoker for < or = 15 years	50	1233		58	6985	TUMOR FREE
TCGA-55-6986-01A	C4	Y	Y	Y	Y	N	Primary Tumor	FEMALE	WHITE	[Not Available]	No	R-Lower	Lung Bronchioloalveolar Carcinoma Nonmucinous	2004	[Not Available]	6th	T2	N0	M0	Stage IB	Alive	Lifelong Non-smoker	[Not Available]	2151		74	6986	TUMOR FREE
TCGA-55-6987-01A	C4	Y	Y	Y	Y	N	Primary Tumor	MALE	WHITE	NOT HISPANIC OR LATINO	No	L-Lower	Lung Adenocarcinoma- Not Otherwise Specified (NOS)	2006	[Not Available]	6th	T1	N0	M0	Stage IA	Alive	Current reformed smoker for < or = 15 years	[Not Available]	1170		77	6987	TUMOR FREE
TCGA-55-7227-01A	C4	Y	Y	N	Y	N	Primary Tumor	MALE	WHITE	NOT HISPANIC OR LATINO	No	R-Lower	Lung Adenocarcinoma- Not Otherwise Specified (NOS)	2011	[Not Available]	7th	T3	N1	MX	Stage IIIA	Alive	Current reformed smoker for > 15 years	[Not Available]	53		77	7227	[Not Available]
TCGA-55-7281-01A	C4	Y	Y	Y	Y	N	Primary Tumor	FEMALE	WHITE	[Not Available]	No	R-Middle	Lung Adenocarcinoma- Not Otherwise Specified (NOS)	2011	R0	7th	T1b	N0	M0	Stage IA	Alive	Current reformed smoker for < or = 15 years	20	18		70	7281	TUMOR FREE
TCGA-55-7283-01A	C4	Y	Y	Y	Y	N	Primary Tumor	FEMALE	WHITE	NOT HISPANIC OR LATINO	No	R-Upper	Lung Bronchioloalveolar Carcinoma Nonmucinous	2011	[Not Available]	7th	T3	N2	MX	Stage IIIA	Alive	Current reformed smoker for > 15 years	5	35		76	7283	WITH TUMOR
TCGA-55-7284-01B	C1	Y	Y	Y	Y	N	Primary Tumor	MALE	WHITE	NOT HISPANIC OR LATINO	Yes, History of Synchronous and or Bilateral Malignancy	R-Lower	Lung Bronchioloalveolar Carcinoma Nonmucinous	2011	R0	7th	T3	N0	MX	Stage IIB	Alive	Current reformed smoker for > 15 years	[Not Available]	121		74	7284	TUMOR FREE
TCGA-55-7570-01A	C1	Y	Y	Y	Y	N	Primary Tumor	MALE	BLACK OR AFRICAN AMERICAN	NOT HISPANIC OR LATINO	No	R-Upper	Lung Adenocarcinoma- Not Otherwise Specified (NOS)	2011	R0	7th	T1a	N0	MX	Stage IA	Alive	Current smoker	[Not Available]	6		60	7570	TUMOR FREE
TCGA-55-7573-01A	C4	Y	Y	Y	Y	Y	Primary Tumor	FEMALE	WHITE	NOT HISPANIC OR LATINO	Yes	R-Upper	Lung Adenocarcinoma- Not Otherwise Specified (NOS)	2011	[Not Available]	7th	T1b	N0	MX	Stage IA	Alive	Current reformed smoker for > 15 years	[Not Available]	4		72	7573	TUMOR FREE
TCGA-55-7574-01A	C4	Y	Y	Y	Y	Y	Primary Tumor	FEMALE	WHITE	NOT HISPANIC OR LATINO	No	R-Upper	Lung Adenocarcinoma- Not Otherwise Specified (NOS)	2011	R1	7th	T2a	N0	M0	Stage IB	Alive	Current reformed smoker for < or = 15 years	2	95		64	7574	[Not Available]
TCGA-55-7576-01A	C2	Y	Y	Y	Y	N	Primary Tumor	MALE	BLACK OR AFRICAN AMERICAN	NOT HISPANIC OR LATINO	No	R-Upper	Lung Adenocarcinoma- Not Otherwise Specified (NOS)	2011	R0	7th	T2a	N0	M0	Stage IB	Alive	Current smoker	[Not Available]	40		54	7576	TUMOR FREE
TCGA-55-7724-01A	C1	Y	Y	Y	Y	N	Primary Tumor	FEMALE	WHITE	NOT HISPANIC OR LATINO	Yes	L-Upper	Lung Adenocarcinoma- Not Otherwise Specified (NOS)	2011	R0	7th	T2a	N0	MX	Stage IB	Alive	Current reformed smoker for < or = 15 years	50	0		76	7724	TUMOR FREE
TCGA-55-7725-01A	C4	Y	Y	Y	Y	N	Primary Tumor	FEMALE	WHITE	NOT HISPANIC OR LATINO	Yes	R-Lower	Lung Adenocarcinoma- Not Otherwise Specified (NOS)	2011	R0	7th	T1a	N0	MX	Stage IA	Alive	Current reformed smoker for > 15 years	16	39		68	7725	[Not Available]
TCGA-55-7726-01A	C1	Y	Y	Y	Y	N	Primary Tumor	FEMALE	WHITE	NOT HISPANIC OR LATINO	Yes	L-Lower	Lung Adenocarcinoma- Not Otherwise Specified (NOS)	2011	R0	7th	T1b	N0	MX	Stage IA	Alive	Current reformed smoker for > 15 years	30	39		72	7726	[Not Available]
TCGA-55-7727-01A	C1	Y	Y	Y	Y	N	Primary Tumor	MALE	WHITE	NOT HISPANIC OR LATINO	No	L-Upper	Lung Adenocarcinoma- Not Otherwise Specified (NOS)	2011	R0	7th	T1a	N2	MX	Stage IIIA	Alive	Current smoker	[Not Available]	34		70	7727	[Not Available]
TCGA-55-7728-01A	C1	Y	Y	Y	Y	Y	Primary Tumor	FEMALE	[Not Available]	[Not Available]	No	L-Upper	Mucinous (Colloid) Carcinoma	2011	R0	7th	T2a	N0	MX	Stage IB	Alive	Current reformed smoker for < or = 15 years	30	24		64	7728	TUMOR FREE
TCGA-55-7815-01A	C1	Y	Y	Y	Y	Y	Primary Tumor	MALE	[Not Available]	[Not Available]	No	R-Lower	Lung Adenocarcinoma- Not Otherwise Specified (NOS)	2011	R0	7th	T2a	N0	MX	Stage IB	Alive	Lifelong Non-smoker	[Not Available]	54		76	7815	[Not Available]
TCGA-55-7903-01A	C2	Y	Y	Y	Y	N	Primary Tumor	MALE	WHITE	NOT HISPANIC OR LATINO	No	R-Lower	Lung Adenocarcinoma- Not Otherwise Specified (NOS)	2011	R0	7th	T1b	N0	MX	Stage IA	Alive	Current smoker	40	19		64	7903	TUMOR FREE
TCGA-55-7907-01A	C4	Y	Y	Y	Y	N	Primary Tumor	MALE	WHITE	NOT HISPANIC OR LATINO	No	L-Upper	Lung Adenocarcinoma- Not Otherwise Specified (NOS)	2011	R0	7th	T2a	N1	MX	Stage IIA	Alive	Current reformed smoker for > 15 years	80	16		77	7907	[Not Available]
TCGA-55-7910-01A	C2	Y	Y	Y	Y	Y	Primary Tumor	FEMALE	BLACK OR AFRICAN AMERICAN	NOT HISPANIC OR LATINO	No	L-Lower	Lung Adenocarcinoma- Not Otherwise Specified (NOS)	2011	R0	7th	T2b	N0	M0	Stage IIA	Alive	Current reformed smoker for < or = 15 years	15	197		50	7910	WITH TUMOR
TCGA-55-7911-01A	C2	Y	Y	Y	Y	Y	Primary Tumor	FEMALE	WHITE	NOT HISPANIC OR LATINO	No	R-Middle	Lung Adenocarcinoma- Not Otherwise Specified (NOS)	2011	R0	7th	T1a	N0	MX	Stage IA	Alive	Current reformed smoker for > 15 years	96	21		70	7911	TUMOR FREE
TCGA-55-7913-01B	C2	Y	Y	Y	Y	N	Primary Tumor
TCGA-55-7914-01A	C2	Y	Y	Y	Y	N	Primary Tumor	FEMALE	WHITE	NOT HISPANIC OR LATINO	Yes	R-Upper	Lung Adenocarcinoma- Not Otherwise Specified (NOS)	2011	R0	7th	T1b	N1	MX	Stage IIA	Alive	Current smoker	5	3		71	7914	WITH TUMOR
TCGA-55-7994-01A	C2	Y	Y	Y	Y	N	Primary Tumor	MALE	WHITE	NOT HISPANIC OR LATINO	No	R-Upper	Lung Adenocarcinoma- Not Otherwise Specified (NOS)	2011	R0	7th	T3	N0	MX	Stage IIB	Alive	Current smoker	28	31		81	7994	TUMOR FREE
TCGA-55-7995-01A	C4	Y	Y	Y	Y	N	Primary Tumor	FEMALE	WHITE	NOT HISPANIC OR LATINO	No	L-Upper	Lung Adenocarcinoma- Not Otherwise Specified (NOS)	2012	R0	7th	T1b	N0	M0	Stage IA	Alive	Current reformed smoker for < or = 15 years	60	5		73	7995	TUMOR FREE
TCGA-55-8085-01A	C2	Y	Y	Y	Y	N	Primary Tumor	MALE	WHITE	NOT HISPANIC OR LATINO	No	L-Lower	Lung Papillary Adenocarcinoma	2011	R0	7th	T1b	N0	M0	Stage IA	Alive	Current smoker	[Not Available]	33		64	8085	TUMOR FREE
TCGA-55-8087-01A	C4	Y	Y	Y	Y	N	Primary Tumor	FEMALE	WHITE	NOT HISPANIC OR LATINO	No	R-Upper	Lung Adenocarcinoma- Not Otherwise Specified (NOS)	2011	R0	7th	T2a	N0	MX	Stage IB	Alive	Lifelong Non-smoker	[Not Available]	21		59	8087	TUMOR FREE
TCGA-55-8089-01A	C1	Y	Y	Y	Y	N	Primary Tumor	MALE	WHITE	NOT HISPANIC OR LATINO	No	R-Upper	Lung Adenocarcinoma- Not Otherwise Specified (NOS)	2011	R0	7th	T1a	N0	M0	Stage IA	Alive	Current smoker	97	100		56	8089	[Not Available]
TCGA-55-8090-01A	C2	Y	Y	Y	Y	N	Primary Tumor	MALE	WHITE	NOT HISPANIC OR LATINO	Yes, History of Synchronous and or Bilateral Malignancy	R-Lower	Lung Adenocarcinoma- Not Otherwise Specified (NOS)	2011	R0	7th	T1a	N0	M0	Stage IA	Alive	Current smoker	[Not Available]	6		80	8090	WITH TUMOR
TCGA-55-8091-01A	C4	Y	Y	Y	Y	N	Primary Tumor	MALE	WHITE	NOT HISPANIC OR LATINO	Yes, History of Prior Malignancy	R-Lower	Lung Adenocarcinoma- Not Otherwise Specified (NOS)	2011	R0	7th	T2	N0	MX	Stage IB	Alive	Current reformed smoker for > 15 years	[Not Available]	43		74	8091	TUMOR FREE
TCGA-55-8092-01A	C2	Y	Y	Y	Y	N	Primary Tumor	MALE	WHITE	NOT HISPANIC OR LATINO	No	R-Upper	Lung Adenocarcinoma- Not Otherwise Specified (NOS)	2012	R0	7th	T3	N0	MX	Stage IIB	Alive	Current reformed smoker for < or = 15 years	40	26		75	8092	TUMOR FREE
TCGA-55-8094-01A	C2	Y	Y	Y	Y	N	Primary Tumor	MALE	WHITE	NOT HISPANIC OR LATINO	No	L-Upper	Lung Adenocarcinoma- Not Otherwise Specified (NOS)	2012	R0	7th	T2b	N0	M1b	Stage IV	Alive	Current reformed smoker for < or = 15 years	70	4		51	8094	WITH TUMOR
TCGA-55-8096-01A	C2	Y	Y	Y	Y	N	Primary Tumor	FEMALE	WHITE	NOT HISPANIC OR LATINO	No	L-Upper	Lung Adenocarcinoma- Not Otherwise Specified (NOS)	2011	[Not Available]	7th	T2a	N0	MX	Stage IB	Alive	Current smoker	104	47		67	8096	WITH TUMOR
TCGA-55-8097-01A	C4	Y	Y	Y	Y	N	Primary Tumor	FEMALE	WHITE	NOT HISPANIC OR LATINO	No	R-Upper	Lung Adenocarcinoma- Not Otherwise Specified (NOS)	2012	R0	7th	T1a	N0	MX	Stage IA	Alive	Current reformed smoker for < or = 15 years	35	15		60	8097	TUMOR FREE
TCGA-55-8203-01A	C2	Y	Y	Y	Y	N	Primary Tumor
TCGA-55-8204-01A	C1	Y	Y	Y	Y	N	Primary Tumor	FEMALE	WHITE	NOT HISPANIC OR LATINO	Yes, History of Prior Malignancy	L-Upper	Lung Adenocarcinoma- Not Otherwise Specified (NOS)	2011	R0	7th	T2a	N0	MX	Stage IB	Alive	Current reformed smoker for > 15 years	[Not Available]	0		87	8204	TUMOR FREE
TCGA-55-8205-01A	C1	Y	Y	Y	Y	N	Primary Tumor	FEMALE	WHITE	NOT HISPANIC OR LATINO	Yes, History of Prior Malignancy	R-Lower	Lung Adenocarcinoma- Not Otherwise Specified (NOS)	2012	R0	7th	T2b	N0	M0	Stage IIB	Alive	Current reformed smoker for < or = 15 years	30	33		76	8205	TUMOR FREE
TCGA-55-8206-01A	C4	Y	Y	Y	Y-QC NOT PASSED	N	Primary Tumor	MALE	WHITE	NOT HISPANIC OR LATINO	No	R-Upper	Lung Adenocarcinoma- Not Otherwise Specified (NOS)	2012	R0	7th	T1b	N0	M0	Stage IA	Alive	Lifelong Non-smoker	[Not Available]	46		56	8206	TUMOR FREE
TCGA-55-8207-01A	C4	Y	Y	Y	Y	N	Primary Tumor	MALE	WHITE	NOT HISPANIC OR LATINO	Yes, History of Synchronous and or Bilateral Malignancy	L-Lower	Lung Acinar Adenocarcinoma	2011	R0	7th	T2a	N0	MX	Stage IB	Alive	Current reformed smoker for > 15 years	[Not Available]	66		73	8207	TUMOR FREE
TCGA-55-8208-01A	C1	Y	Y	Y	Y	N	Primary Tumor	FEMALE	WHITE	NOT HISPANIC OR LATINO	No	R-Upper	Lung Adenocarcinoma- Not Otherwise Specified (NOS)	2012	R0	7th	T1b	N0	M0	Stage IA	Alive	Current smoker	50	0		73	8208	TUMOR FREE
TCGA-55-8299-01A	C1	Y	Y	Y	Y	N	Primary Tumor	FEMALE	WHITE	NOT HISPANIC OR LATINO	No	R-Upper	Lung Adenocarcinoma- Not Otherwise Specified (NOS)	2012	R0	7th	T1b	N0	MX	Stage IA	Alive	Current reformed smoker for < or = 15 years	20	216		61	8299	TUMOR FREE
TCGA-55-8301-01A	C4	Y	Y	Y	Y	N	Primary Tumor	MALE	WHITE	NOT HISPANIC OR LATINO	No	R-Lower	Lung Adenocarcinoma- Not Otherwise Specified (NOS)	2012	R0	7th	T2a	N0	MX	Stage IB	Alive	Current smoker	100	44		58	8301	TUMOR FREE
TCGA-55-8302-01A	C1	Y	Y	Y	Y	N	Primary Tumor	MALE	WHITE	[Not Evaluated]	No	R-Lower	Lung Adenocarcinoma- Not Otherwise Specified (NOS)	2012	R0	7th	T2	N0	MX	Stage IB	Alive	Current smoker	59	23		54	8302	TUMOR FREE
TCGA-55-8505-01A	C1	Y	Y	Y	Y	N	Primary Tumor	MALE	WHITE	NOT HISPANIC OR LATINO	No	R-Lower	Lung Adenocarcinoma- Not Otherwise Specified (NOS)	2012	R0	7th	T1a	N2	MX	Stage IIIA	Alive	Lifelong Non-smoker	[Not Available]	29		62	8505	TUMOR FREE
TCGA-55-8507-01A	C3	Y	Y	Y	Y	N	Primary Tumor	MALE	WHITE	NOT HISPANIC OR LATINO	No	R-Upper	Lung Adenocarcinoma- Not Otherwise Specified (NOS)	2012	R0	7th	T1a	N0	MX	Stage IA	Alive	Current smoker	120	8		53	8507	TUMOR FREE
TCGA-55-8508-01A	C1	Y	Y	Y	Y	N	Primary Tumor	FEMALE	BLACK OR AFRICAN AMERICAN	NOT HISPANIC OR LATINO	No	R-Upper	Mucinous (Colloid) Carcinoma	2012	R0	7th	T2a	N1	MX	Stage IIA	Alive	Current smoker	[Not Available]	15		60	8508	[Unknown]
TCGA-55-8510-01A	C4	Y	Y	Y	Y	N	Primary Tumor	FEMALE	WHITE	NOT HISPANIC OR LATINO	No	R-Lower	Lung Adenocarcinoma- Not Otherwise Specified (NOS)	2012	R0	7th	T2a	N0	MX	Stage IB	Alive	Current smoker	[Not Available]	228		55	8510	TUMOR FREE
TCGA-55-8511-01A	C3	Y	Y	Y	Y	N	Primary Tumor	FEMALE	WHITE	NOT HISPANIC OR LATINO	Yes, History of Prior Malignancy	R-Upper	Lung Adenocarcinoma- Not Otherwise Specified (NOS)	2012	R0	7th	T2a	N0	MX	Stage IB	Alive	Current smoker	58	9		73	8511	TUMOR FREE
TCGA-55-8512-01A	C3	Y	Y	Y	Y	N	Primary Tumor	MALE	WHITE	NOT HISPANIC OR LATINO	No	R-Lower	Lung Bronchioloalveolar Carcinoma Nonmucinous	2012	R0	7th	T1a	N1	M1b	Stage IV	Alive	Current smoker	19	3		41	8512	WITH TUMOR
TCGA-55-8513-01A	C3	Y	Y	Y	Y	N	Primary Tumor	FEMALE	WHITE	NOT HISPANIC OR LATINO	No	L-Lower	Mucinous (Colloid) Carcinoma	2012	R0	7th	T3	N0	MX	Stage IIB	Alive	Lifelong Non-smoker	[Not Available]	146		77	8513	TUMOR FREE
TCGA-55-8614-01A	C1	Y	Y	Y	Y	N	Primary Tumor	MALE	WHITE	NOT HISPANIC OR LATINO	No	L-Upper	Lung Adenocarcinoma- Not Otherwise Specified (NOS)	2011	R0	7th	T2a	N0	MX	Stage IB	Alive	Current reformed smoker for > 15 years	40	41		76	8614	TUMOR FREE
TCGA-55-8615-01A	C2	Y	Y	Y	Y	N	Primary Tumor	MALE	WHITE	NOT HISPANIC OR LATINO	No	R-Middle	Lung Adenocarcinoma- Not Otherwise Specified (NOS)	2012	R0	7th	T3	N2	MX	Stage IIIA	Alive	Current smoker	67	15		67	8615	[Unknown]
TCGA-55-8616-01A	C3	Y	Y	Y	Y	N	Primary Tumor	FEMALE	WHITE	NOT HISPANIC OR LATINO	No	R-Upper	Lung Adenocarcinoma- Not Otherwise Specified (NOS)	2012	R0	7th	T2a	N0	M0	Stage IB	Alive	Current reformed smoker for < or = 15 years	[Not Available]	48		58	8616	TUMOR FREE
TCGA-55-8619-01A	C3	Y	Y	Y	Y	N	Primary Tumor	FEMALE	WHITE	NOT HISPANIC OR LATINO	Yes, History of Prior Malignancy	R-Lower	Mucinous (Colloid) Carcinoma	2012	R0	7th	T3	N0	MX	Stage IIB	Alive	Lifelong Non-smoker	[Not Available]	49		72	8619	TUMOR FREE
TCGA-55-8620-01A	C2	Y	Y	Y	Y	N	Primary Tumor	MALE	WHITE	NOT HISPANIC OR LATINO	No	L-Upper	Lung Adenocarcinoma- Not Otherwise Specified (NOS)	2012	R0	7th	T1a	N1	M1b	Stage IV	Alive	Current reformed smoker for < or = 15 years	154	66		60	8620	WITH TUMOR
TCGA-55-A48X-01A	C3	Y	Y	Y	Y	N	Primary Tumor	FEMALE	WHITE	NOT HISPANIC OR LATINO	Yes, History of Prior Malignancy	L-Lower	Lung Adenocarcinoma- Not Otherwise Specified (NOS)	2012	R0	7th	T1b	N1	M0	Stage IIA	Alive	Current reformed smoker for < or = 15 years	36	33		63	A48X	TUMOR FREE
TCGA-55-A48Z-01A	C4	Y	Y	Y	Y	N	Primary Tumor	FEMALE	WHITE	NOT HISPANIC OR LATINO	No	R-Upper	Lung Adenocarcinoma Mixed Subtype	2012	R0	7th	T1a	N3	MX	Stage IIIB	Alive	Current reformed smoker for < or = 15 years	40	29		60	A48Z	WITH TUMOR
TCGA-55-A491-01A	C2	Y	Y	Y	Y	N	Primary Tumor	FEMALE	WHITE	NOT HISPANIC OR LATINO	Yes, History of Prior Malignancy	L-Lower	Lung Adenocarcinoma- Not Otherwise Specified (NOS)	2012	R0	7th	T1b	N0	MX	Stage IA	Alive	Current reformed smoker for > 15 years	45	0		81	A491	TUMOR FREE
TCGA-55-A492-01A	C4	Y	Y	Y	Y	N	Primary Tumor	FEMALE	WHITE	NOT HISPANIC OR LATINO	Yes, History of Prior Malignancy	R-Upper	Lung Adenocarcinoma- Not Otherwise Specified (NOS)	2012	R0	7th	T1a	N0	MX	Stage IA	Alive	Current reformed smoker for > 15 years	35	1		70	A492	TUMOR FREE
TCGA-55-A493-01A	C1	Y	Y	Y	Y	N	Primary Tumor	FEMALE	WHITE	NOT HISPANIC OR LATINO	No	R-Upper	Lung Adenocarcinoma- Not Otherwise Specified (NOS)	2012	R0	7th	T2a	N0	M0	Stage IB	Alive	Current smoker	53	28		54	A493	TUMOR FREE
TCGA-55-A494-01A	C2	Y	Y	Y	Y	N	Primary Tumor	FEMALE	WHITE	NOT HISPANIC OR LATINO	No	R-Lower	Lung Adenocarcinoma- Not Otherwise Specified (NOS)	2012	R0	7th	T2a	N0	MX	Stage IB	Alive	Current reformed smoker for > 15 years	7	5		61	A494	TUMOR FREE
TCGA-55-A4DF-01A	C1	Y	Y	Y	Y	N	Primary Tumor	MALE	WHITE	NOT HISPANIC OR LATINO	Yes, History of Synchronous and or Bilateral Malignancy	R-Lower	Lung Adenocarcinoma- Not Otherwise Specified (NOS)	2012	R0	7th	T1b	N0	MX	Stage IA	Alive	Current reformed smoker for > 15 years	60	47		88	A4DF	TUMOR FREE
TCGA-55-A4DG-01A	C4	Y	Y	Y	Y	N	Primary Tumor	MALE	WHITE	NOT HISPANIC OR LATINO	No	R-Upper	Lung Adenocarcinoma- Not Otherwise Specified (NOS)	2012	R0	7th	T1b	N0	MX	Stage IA	Alive	Current reformed smoker for < or = 15 years	100	162		71	A4DG	TUMOR FREE
TCGA-62-8395-01A	C4	Y	Y	Y	Y	N	Primary Tumor	FEMALE	WHITE	NOT HISPANIC OR LATINO	No	R-Upper	Lung Adenocarcinoma Mixed Subtype	2009	R0	6th	T3	N0	M0	Stage IIB	Alive	Lifelong Non-smoker	[Not Available]	705		80	8395	WITH TUMOR
TCGA-62-A46O-01A	C1	Y	Y	Y	Y	N	Primary Tumor	FEMALE	WHITE	NOT HISPANIC OR LATINO	No	R-Lower	Lung Adenocarcinoma- Not Otherwise Specified (NOS)	2006	R0	6th	T2	N0	M0	Stage IB	Dead	Current smoker	48	[Not Available]	1454	65	A46O	WITH TUMOR
TCGA-62-A46P-01A	C4	Y	Y	Y	Y	N	Primary Tumor	MALE	WHITE	NOT HISPANIC OR LATINO	No	L-Upper	Lung Adenocarcinoma Mixed Subtype	2006	R0	6th	T2	N0	M0	Stage IB	Dead	Current reformed smoker for < or = 15 years	40	[Not Available]	594	65	A46P	TUMOR FREE
TCGA-62-A46R-01A	C2	Y	Y	Y	Y	N	Primary Tumor	FEMALE	WHITE	NOT HISPANIC OR LATINO	No	L-Lower	Lung Adenocarcinoma Mixed Subtype	2006	R0	6th	T2	N0	M0	Stage IB	Dead	Current reformed smoker for < or = 15 years	25	[Not Available]	1725	54	A46R	TUMOR FREE
TCGA-62-A46U-01A	C2	Y	Y	Y	Y	N	Primary Tumor	FEMALE	WHITE	NOT HISPANIC OR LATINO	No	R-Lower	Lung Adenocarcinoma Mixed Subtype	2007	R0	6th	T2	N1	M0	Stage IIB	Alive	Lifelong Non-smoker	[Not Available]	1708		71	A46U	TUMOR FREE
TCGA-62-A46V-01A	C2	Y	Y	Y	Y	N	Primary Tumor	FEMALE	WHITE	NOT HISPANIC OR LATINO	No	L-Lower	Lung Adenocarcinoma Mixed Subtype	2007	R0	6th	T2	N0	M0	Stage IB	Alive	Current reformed smoker for > 15 years	[Not Available]	1631		78	A46V	TUMOR FREE
TCGA-62-A46Y-01A	C4	Y	Y	Y	Y	N	Primary Tumor	FEMALE	WHITE	NOT HISPANIC OR LATINO	No	R-Lower	Lung Adenocarcinoma Mixed Subtype	2008	R0	6th	T2	N2	M0	Stage IIIA	Dead	Lifelong Non-smoker	[Not Available]	[Not Available]	414	70	A46Y	WITH TUMOR
TCGA-62-A470-01A	C3	Y	Y	Y	Y	N	Primary Tumor	MALE	WHITE	NOT HISPANIC OR LATINO	No	R-Upper	Lung Acinar Adenocarcinoma	2009	R0	6th	T2	N0	M0	Stage IB	Dead	Current reformed smoker for > 15 years	30	[Not Available]	1194	84	A470	WITH TUMOR
TCGA-62-A471-01A	C1	Y	Y	Y	Y	N	Primary Tumor	MALE	WHITE	NOT HISPANIC OR LATINO	No	L-Upper	Lung Adenocarcinoma- Not Otherwise Specified (NOS)	2010	R0	7th	T2b	N1	M0	Stage IIB	Alive	Current reformed smoker for < or = 15 years	30	883		64	A471	TUMOR FREE
TCGA-62-A472-01A	C2	Y	Y	Y	Y	N	Primary Tumor	MALE	WHITE	NOT HISPANIC OR LATINO	No	R-Lower	Lung Adenocarcinoma- Not Otherwise Specified (NOS)	2011	R0	7th	T3	N0	M0	Stage IIB	Alive	Current smoker	60	540		70	A472	WITH TUMOR
TCGA-64-1677-01A	C1	Y	Y	Y	N	Y	Primary Tumor	FEMALE	WHITE	NOT HISPANIC OR LATINO	Yes	R-Lower	Lung Adenocarcinoma- Not Otherwise Specified (NOS)	2005	R0	[Not Available]	T2	N2	M0	Stage IIIA	Dead	Current smoker	50	628	628	77	1677	[Not Available]
TCGA-64-1678-01A	C1	Y	Y	Y	N	Y	Primary Tumor	FEMALE	WHITE	NOT HISPANIC OR LATINO	No	R-Middle	Lung Adenocarcinoma- Not Otherwise Specified (NOS)	2006	R0	6th	T2b	N0	M0	Stage IIA	Alive	Current reformed smoker for > 15 years	20	1189		70	1678	TUMOR FREE
TCGA-64-1679-01A	C2	Y	Y	Y	Y	Y	Primary Tumor	FEMALE	WHITE	NOT HISPANIC OR LATINO	No	R-Upper	Lung Adenocarcinoma- Not Otherwise Specified (NOS)	2007	R0	6th	T1	N2	M0	Stage IIIA	Alive	Current smoker	40	1686		58	1679	TUMOR FREE
TCGA-64-1681-01A	C4	Y	Y	Y	Y	Y	Primary Tumor	FEMALE	WHITE	NOT HISPANIC OR LATINO	No	R-Upper	Lung Adenocarcinoma- Not Otherwise Specified (NOS)	2008	R0	6th	T1	N0	M0	Stage IA	Dead	Current reformed smoker for > 15 years	[Not Available]	[Not Available]	1167	61	1681	[Not Available]
TCGA-64-5774-01A	C1	Y	Y	Y	Y	Y	Primary Tumor	MALE	WHITE	NOT HISPANIC OR LATINO	No	R-Middle	Lung Adenocarcinoma- Not Otherwise Specified (NOS)	2004	R0	6th	T2	N0	M0	Stage IB	Alive	Current reformed smoker for < or = 15 years	45	2550		60	5774	TUMOR FREE
TCGA-64-5775-01A	C1	Y	Y	Y	Y	N	Primary Tumor	MALE	WHITE	NOT HISPANIC OR LATINO	No	L-Upper	Lung Adenocarcinoma- Not Otherwise Specified (NOS)	2005	R0	[Not Available]	T4	N0	M0	Stage IIIA	Dead	Current smoker	110	62	62	71	5775	WITH TUMOR
TCGA-64-5778-01A	C4	Y	Y	Y	Y	Y	Primary Tumor	MALE	WHITE	NOT HISPANIC OR LATINO	No	R-Upper	Lung Bronchioloalveolar Carcinoma Nonmucinous	2008	R0	6th	T2	N0	M0	Stage IB	Alive	Current reformed smoker for < or = 15 years	68	926		60	5778	TUMOR FREE
TCGA-64-5779-01A	C2	Y	Y	Y	Y	Y	Primary Tumor	MALE	WHITE	NOT HISPANIC OR LATINO	No	L-Lower	Lung Acinar Adenocarcinoma	2009	R0	6th	T2	N2	M0	Stage IIIA	Alive	Current reformed smoker for < or = 15 years	40	507		61	5779	TUMOR FREE
TCGA-64-5781-01A	C1	Y	Y	Y	Y	Y	Primary Tumor	FEMALE	WHITE	NOT HISPANIC OR LATINO	No	R-Upper	Lung Adenocarcinoma Mixed Subtype	2007	R0	6th	T2	N0	M0	Stage IB	Alive	Current reformed smoker for < or = 15 years	25	1202		55	5781	TUMOR FREE
TCGA-64-5815-01A	C1	Y	Y	Y	Y	Y	Primary Tumor	MALE	WHITE	NOT HISPANIC OR LATINO	No	R-Upper	Lung Adenocarcinoma Mixed Subtype	2009	R0	6th	T2	N1	M0	Stage IIB	Alive	Current reformed smoker for > 15 years	30	224		74	5815	TUMOR FREE
TCGA-67-3772-01A	C3	Y	Y	Y	N	N	Primary Tumor	FEMALE	WHITE	NOT HISPANIC OR LATINO	No	R-Upper	Lung Adenocarcinoma- Not Otherwise Specified (NOS)	2009	[Not Available]	6th	T2	N0	M0	Stage IB	Alive	Lifelong Non-smoker	[Not Available]	573		82	3772	TUMOR FREE
TCGA-67-3773-01A	C4	Y	Y	Y	N	N	Primary Tumor	FEMALE	WHITE	NOT HISPANIC OR LATINO	No	L-Lower	Lung Adenocarcinoma- Not Otherwise Specified (NOS)	2009	R0	6th	T2	N0	M0	Stage IB	Alive	Current reformed smoker for > 15 years	[Not Available]	427		84	3773	TUMOR FREE
TCGA-67-4679-01B	C4	Y	Y	Y	Y	N	Primary Tumor	MALE	WHITE	NOT HISPANIC OR LATINO	No	R-Lower	Lung Adenocarcinoma- Not Otherwise Specified (NOS)	2009	R0	[Not Available]	T3	N0	M0	Stage IB	Alive	Current reformed smoker for < or = 15 years	[Not Available]	0		69	4679	TUMOR FREE
TCGA-67-6215-01A	C2	Y	Y	Y	Y	Y	Primary Tumor	FEMALE	WHITE	NOT HISPANIC OR LATINO	No	R-Lower	Lung Adenocarcinoma- Not Otherwise Specified (NOS)	2010	R0	7th	T2a	N0	M0	Stage IB	Alive	Lifelong Non-smoker	[Not Available]	162		52	6215	TUMOR FREE
TCGA-67-6216-01A	C4	Y	Y	Y	Y	Y	Primary Tumor	FEMALE	WHITE	NOT HISPANIC OR LATINO	No	R-Middle	Lung Adenocarcinoma- Not Otherwise Specified (NOS)	2010	R0	7th	T1a	N0	M0	Stage IA	Alive	Lifelong Non-smoker	[Not Available]	141		57	6216	TUMOR FREE
TCGA-67-6217-01A	C4	Y	Y	Y	Y	Y	Primary Tumor	FEMALE	WHITE	NOT HISPANIC OR LATINO	Yes	L-Upper	Lung Adenocarcinoma- Not Otherwise Specified (NOS)	2010	R0	7th	T2a	N1	M0	Stage IIA	Alive	Current reformed smoker for > 15 years	[Not Available]	422		73	6217	WITH TUMOR
TCGA-69-7760-01A	C2	Y	Y	Y	Y	Y	Primary Tumor	MALE	WHITE	NOT HISPANIC OR LATINO	No	R-Lower	Lung Acinar Adenocarcinoma	2011	[Not Available]	7th	T3	N0	M0	Stage IIB	Alive	Lifelong Non-smoker	[Not Available]	154		73	7760	[Not Available]
TCGA-69-7761-01A	C1	Y	Y	Y	Y	Y	Primary Tumor	MALE	WHITE	NOT HISPANIC OR LATINO	No	L-Lower	Lung Acinar Adenocarcinoma	2011	[Not Available]	7th	T2a	N0	MX	Stage IB	Alive	Current reformed smoker for > 15 years	20	186		84	7761	TUMOR FREE
TCGA-69-7763-01A	C3	Y	Y	Y	Y	Y	Primary Tumor	MALE	WHITE	NOT HISPANIC OR LATINO	No	R-Middle	Lung Adenocarcinoma Mixed Subtype	2010	[Not Available]	7th	T1b	N0	M0	Stage IA	Alive	Current reformed smoker for < or = 15 years	7.5	690		69	7763	[Not Available]
TCGA-69-7764-01A	C4	Y	Y	Y	Y	Y	Primary Tumor	MALE	WHITE	NOT HISPANIC OR LATINO	No	R-Upper	Lung Adenocarcinoma Mixed Subtype	2010	[Not Available]	7th	T1b	N0	M0	Stage IA	Alive	Current reformed smoker for > 15 years	30	414		75	7764	[Not Available]
TCGA-69-7765-01A	C4	Y	Y	Y	Y	Y	Primary Tumor	MALE	BLACK OR AFRICAN AMERICAN	NOT HISPANIC OR LATINO	No	R-Upper	Lung Adenocarcinoma Mixed Subtype	2011	[Not Available]	7th	T4	N0	MX	Stage IV	Alive	Current reformed smoker for < or = 15 years	[Not Available]	129		56	7765	[Not Available]
TCGA-69-7973-01A	C2	Y	Y	Y	Y	N	Primary Tumor	FEMALE	WHITE	NOT HISPANIC OR LATINO	No	R-Middle	Lung Adenocarcinoma Mixed Subtype	2011	[Not Available]	7th	T2a	N0	M0	Stage IB	Alive	Current reformed smoker for < or = 15 years	25	230		42	7973	TUMOR FREE
TCGA-69-7974-01A	C2	Y	Y	Y	Y	N	Primary Tumor	FEMALE	WHITE	NOT HISPANIC OR LATINO	No	L-Upper	Lung Adenocarcinoma Mixed Subtype	2011	[Not Available]	7th	T2a	N2	MX	Stage IIIA	Alive	Current reformed smoker for < or = 15 years	30	184		54	7974	WITH TUMOR
TCGA-69-7978-01A	C1	Y	Y	Y	Y	N	Primary Tumor	MALE	WHITE	NOT HISPANIC OR LATINO	No	R-Upper	Lung Adenocarcinoma Mixed Subtype	2011	[Not Available]	7th	T2b	N1	MX	Stage IIB	Alive	Current smoker	80	70		59	7978	WITH TUMOR
TCGA-69-7979-01A	C2	Y	Y	Y	Y	N	Primary Tumor	FEMALE	WHITE	NOT HISPANIC OR LATINO	No	R-Upper	Lung Acinar Adenocarcinoma	2011	[Not Available]	7th	T2a	N0	MX	Stage IB	Alive	Current smoker	28	89		71	7979	[Not Available]
TCGA-69-7980-01A	C4	Y	Y	Y	Y	N	Primary Tumor	FEMALE	WHITE	NOT HISPANIC OR LATINO	No	R-Upper	Lung Adenocarcinoma- Not Otherwise Specified (NOS)	2011	[Not Available]	7th	T1b	N0	M0	Stage I	Alive	Current reformed smoker for < or = 15 years	80	382		69	7980	[Not Available]
TCGA-69-8254-01A	C3	Y	Y	Y	Y	N	Primary Tumor	MALE	WHITE	NOT HISPANIC OR LATINO	No	R-Lower	Lung Adenocarcinoma Mixed Subtype	2012	[Not Available]	7th	T2b	[Not Available]	[Not Available]	[Not Available]	Alive	Current reformed smoker for > 15 years	40	77		85	8254	TUMOR FREE
TCGA-69-8255-01A	C2	Y	Y	Y	Y	N	Primary Tumor	MALE	WHITE	HISPANIC OR LATINO	No	R-Upper	Lung Solid Pattern Predominant Adenocarcinoma	2011	[Not Available]	7th	T1a	N0	M0	Stage IA	Alive	Current smoker	40	129		71	8255	[Unknown]
TCGA-71-6725-01A	C4	Y	Y	Y	Y	Y	Primary Tumor	FEMALE	ASIAN	NOT HISPANIC OR LATINO	No	R-Upper	Lung Papillary Adenocarcinoma	2011	RX	6th	T2	N0	M0	Stage IB	Alive	Current smoker	[Not Available]	61		48	6725	TUMOR FREE
TCGA-73-4659-01A	C4	Y	Y	Y	N	Y	Primary Tumor	MALE	WHITE	NOT HISPANIC OR LATINO	No	R-Upper	Lung Adenocarcinoma- Not Otherwise Specified (NOS)	2006	R0	6th	T2	N2	M0	Stage IIIA	Dead	Current reformed smoker for > 15 years	12	711	711	66	4659	WITH TUMOR
TCGA-73-4662-01A	C4	Y	Y	Y	N	N	Primary Tumor	FEMALE	WHITE	NOT HISPANIC OR LATINO	No	L-Upper	Lung Adenocarcinoma- Not Otherwise Specified (NOS)	2007	R0	[Not Available]	T1	N0	M0	Stage IA	Alive	Current reformed smoker for > 15 years	10	912		65	4662	TUMOR FREE
TCGA-73-4666-01A	C2	Y	Y	Y	N	N	Primary Tumor	FEMALE	WHITE	NOT HISPANIC OR LATINO	No	R-Upper	Lung Adenocarcinoma- Not Otherwise Specified (NOS)	2009	R0	[Not Available]	T1	N0	M1	Stage IV	Alive	Current reformed smoker for < or = 15 years	10	618		52	4666	TUMOR FREE
TCGA-73-4668-01A	C2	Y	Y	Y	N	N	Primary Tumor	FEMALE	AMERICAN INDIAN OR ALASKA NATIVE	NOT HISPANIC OR LATINO	No	L-Upper	Lung Micropapillary Adenocarcinoma	2009	R0	[Not Available]	T2	N1	M0	Stage IIB	Alive	Current reformed smoker for < or = 15 years	55	467		66	4668	WITH TUMOR
TCGA-73-4670-01A	C1	Y	Y	Y	N	Y	Primary Tumor	FEMALE	WHITE	NOT HISPANIC OR LATINO	No	L-Upper	Lung Adenocarcinoma- Not Otherwise Specified (NOS)	2010	R0	[Not Available]	T2	N0	M1	Stage IV	Alive	Current reformed smoker for < or = 15 years	30	14		69	4670	WITH TUMOR
TCGA-73-4675-01A	C1	Y	Y	Y	N	Y	Primary Tumor	MALE	WHITE	NOT HISPANIC OR LATINO	No	L-Lower	Lung Adenocarcinoma- Not Otherwise Specified (NOS)	2010	RX	7th	T3	N1	M0	Stage IIIA	Alive	Current reformed smoker for < or = 15 years	41	40		59	4675	TUMOR FREE
TCGA-73-4676-01A	C1	Y	Y	Y	Y	Y	Primary Tumor	MALE	WHITE	NOT HISPANIC OR LATINO	No	R-Upper	Lung Adenocarcinoma- Not Otherwise Specified (NOS)	2010	R0	[Not Available]	T2a	N1	M0	Stage IIA	Alive	Current reformed smoker for < or = 15 years	48	122		45	4676	[Not Available]
TCGA-73-4677-01A	C3	Y	Y	Y	N	N	Primary Tumor	MALE	WHITE	NOT HISPANIC OR LATINO	No	R-Upper	Lung Adenocarcinoma- Not Otherwise Specified (NOS)	2010	R0	[Not Available]	T2a	N0	M0	Stage IA	Dead	Current reformed smoker for > 15 years	[Not Available]	38	38	74	4677	WITH TUMOR
TCGA-73-7498-01A	C4	Y	Y	Y	Y	Y	Primary Tumor	FEMALE	WHITE	NOT HISPANIC OR LATINO	No	R-Lower	Lung Bronchioloalveolar Carcinoma Nonmucinous	2010	R0	7th	T1b	N0	M0	Stage IA	Alive	Current reformed smoker for < or = 15 years	28	621		58	7498	TUMOR FREE
TCGA-73-7499-01A	C4	Y	Y	Y	Y	Y	Primary Tumor	FEMALE	WHITE	NOT HISPANIC OR LATINO	No	R-Upper	Lung Adenocarcinoma Mixed Subtype	2010	R0	7th	T2a	N0	M0	Stage IB	Alive	Lifelong Non-smoker	[Not Available]	519		81	7499	TUMOR FREE
TCGA-75-5122-01A	C2	Y	Y	Y	Y	Y	Primary Tumor	MALE	[Not Available]	[Not Available]	No	L-Upper	Lung Adenocarcinoma- Not Otherwise Specified (NOS)	2005	R0	[Not Available]	T2	N0	M0	Stage IB	Dead	Current reformed smoker for > 15 years	20	[Not Available]		[Not Available]	5122	WITH TUMOR
TCGA-75-5125-01A	C2	Y	Y	Y	Y	Y	Primary Tumor	MALE	[Not Available]	[Not Available]	No	R-Upper	Lung Adenocarcinoma- Not Otherwise Specified (NOS)	2007	R0	[Not Available]	T2	N1	M0	Stage IIB	Alive	Current reformed smoker for > 15 years	25	[Not Available]		[Not Available]	5125	TUMOR FREE
TCGA-75-5126-01A	C1	Y	Y	Y	Y	N	Primary Tumor	FEMALE	[Not Available]	[Not Available]	No	L-Upper	Lung Papillary Adenocarcinoma	2007	R2	[Not Available]	T3	N2	M0	Stage IIIA	Alive	Current reformed smoker for < or = 15 years	40	[Not Available]		[Not Available]	5126	WITH TUMOR
TCGA-75-5146-01A	C4	Y	Y	Y	Y	N	Primary Tumor	MALE	[Not Available]	[Not Available]	No	R-Lower	Lung Adenocarcinoma- Not Otherwise Specified (NOS)	2007	R0	[Not Available]	T2	N0	M0	Stage IB	Alive	Current reformed smoker for > 15 years	[Not Available]	[Not Available]		[Not Available]	5146	TUMOR FREE
TCGA-75-5147-01A	C1	Y	Y	Y	Y	N	Primary Tumor	FEMALE	[Not Available]	[Not Available]	No	R-Upper	Lung Adenocarcinoma- Not Otherwise Specified (NOS)	2007	R0	[Not Available]	T2	N0	M0	Stage IB	Alive	Lifelong Non-smoker	[Not Available]	[Not Available]		[Not Available]	5147	TUMOR FREE
TCGA-75-6203-01A	C4	Y	Y	Y	Y	Y	Primary Tumor	FEMALE	[Not Available]	[Not Available]	No	L-Lower	Lung Adenocarcinoma- Not Otherwise Specified (NOS)	2008	R0	6th	T2	N2	M0	Stage IIIA	Alive	Lifelong Non-smoker	0	[Not Available]		[Not Available]	6203	TUMOR FREE
TCGA-75-6205-01A	C1	Y	Y	Y	Y	Y	Primary Tumor	FEMALE	[Not Available]	[Not Available]	No	L-Upper	Lung Adenocarcinoma- Not Otherwise Specified (NOS)	2006	R0	7th	T2a	N0	M0	Stage IB	Dead	Lifelong Non-smoker	[Not Available]	[Not Available]		[Not Available]	6205	TUMOR FREE
TCGA-75-6206-01A	C2	Y	Y	Y	Y	Y	Primary Tumor	MALE	[Not Available]	[Not Available]	No	R-Upper	Lung Adenocarcinoma- Not Otherwise Specified (NOS)	2007	R0	6th	T2	N0	M0	Stage IB	Alive	Current reformed smoker for > 15 years	20	[Not Available]		[Not Available]	6206	TUMOR FREE
TCGA-75-6207-01A	C2	Y	Y	Y	Y	Y	Primary Tumor	MALE	[Not Available]	[Not Available]	No	R-Upper	Lung Adenocarcinoma- Not Otherwise Specified (NOS)	2007	R0	6th	T2	N2	M0	Stage IIIA	Dead	Current reformed smoker for > 15 years	10	[Not Available]		[Not Available]	6207	[Not Available]
TCGA-75-6211-01A	C1	Y	Y	Y	Y	Y	Primary Tumor	FEMALE	[Not Available]	[Not Available]	No	Bronchial	Lung Adenocarcinoma- Not Otherwise Specified (NOS)	2009	R0	6th	T2	N0	M0	Stage IB	Dead	Current smoker	34	[Not Available]		[Not Available]	6211	WITH TUMOR
TCGA-75-6212-01A	C4	Y	Y	Y	Y	Y	Primary Tumor	FEMALE	[Not Available]	[Not Available]	No	L-Lower	Lung Micropapillary Adenocarcinoma	2009	R0	6th	T2	N1	M0	Stage IIA	Alive	Lifelong Non-smoker	[Not Available]	[Not Available]		[Not Available]	6212	TUMOR FREE
TCGA-75-6214-01A	C1	Y	Y	Y	Y	Y	Primary Tumor	FEMALE	[Not Available]	[Not Available]	No	R-Upper	Lung Adenocarcinoma- Not Otherwise Specified (NOS)	2010	R0	6th	T2	N2	M0	Stage IIIA	Alive	Current smoker	40	[Not Available]		[Not Available]	6214	WITH TUMOR
TCGA-75-7025-01A	C4	Y	Y	Y	Y	N	Primary Tumor	MALE	[Not Available]	[Not Available]	No	L-Lower	Lung Adenocarcinoma- Not Otherwise Specified (NOS)	2006	R0	6th	T2	N0	M0	Stage IB	Alive	Current reformed smoker for > 15 years	[Not Available]	[Not Available]		[Not Available]	7025	TUMOR FREE
TCGA-75-7027-01A	C1	Y	Y	Y	Y	Y	Primary Tumor	MALE	[Not Available]	[Not Available]	No	L-Lower	Lung Adenocarcinoma- Not Otherwise Specified (NOS)	2006	R0	6th	T2	N0	M0	Stage IB	Alive	Current smoker	50	[Not Available]		[Not Available]	7027	TUMOR FREE
TCGA-75-7030-01A	C3	Y	Y	Y	Y	Y	Primary Tumor	MALE	[Not Available]	[Not Available]	No	R-Lower	Lung Adenocarcinoma- Not Otherwise Specified (NOS)	2007	R0	6th	T3	N0	M0	Stage IIB	Alive	Lifelong Non-smoker	[Not Available]	[Not Available]		[Not Available]	7030	TUMOR FREE
TCGA-75-7031-01A	C4	Y	Y	Y	Y	Y	Primary Tumor	FEMALE	[Not Available]	[Not Available]	No	R-Upper	Lung Adenocarcinoma- Not Otherwise Specified (NOS)	2008	R0	6th	T2	N0	M0	Stage IB	Alive	Current reformed smoker for > 15 years	5	[Not Available]		[Not Available]	7031	TUMOR FREE
TCGA-78-7145-01A	C2	Y	Y	Y	Y	Y	Primary Tumor	FEMALE	WHITE	[Not Available]	No	R-Middle	Lung Adenocarcinoma- Not Otherwise Specified (NOS)	2000	R1	6th	T4	N1	M1	Stage IV	Dead	Current reformed smoker for < or = 15 years	25	[Not Available]	826	52	7145	WITH TUMOR
TCGA-78-7146-01A	C1	Y	Y	Y	Y	Y	Primary Tumor	FEMALE	WHITE	[Not Available]	No	L-Lower	Lung Adenocarcinoma Mixed Subtype	1999	R0	6th	T2	N2	M0	Stage IIIA	Dead	Current reformed smoker for < or = 15 years	6	[Not Available]	173	71	7146	[Not Available]
TCGA-78-7147-01A	C4	Y	Y	Y	Y	Y	Primary Tumor	FEMALE	WHITE	[Not Available]	No	R-Upper	Lung Adenocarcinoma- Not Otherwise Specified (NOS)	2001	R0	6th	T2	N1	M0	Stage IIB	Dead	Current smoker	50	[Not Available]	586	67	7147	WITH TUMOR
TCGA-78-7148-01A	C1	Y	Y	Y	Y	Y	Primary Tumor	MALE	WHITE	[Not Available]	No	L-Upper	Lung Adenocarcinoma Mixed Subtype	2001	R0	6th	T2	N1	M0	Stage IIB	Dead	Current smoker	57	[Not Available]	626	71	7148	[Not Available]
TCGA-78-7149-01A	C3	Y	Y	Y	Y	Y	Primary Tumor	MALE	WHITE	[Not Available]	No	R-Lower	Lung Adenocarcinoma Mixed Subtype	2002	R0	6th	T4	N0	M0	Stage IIIB	Alive	Current smoker	115	1093		71	7149	[Not Available]
TCGA-78-7150-01A	C1	Y	Y	Y	Y	Y	Primary Tumor	MALE	WHITE	[Not Available]	No	L-Lower	Lung Adenocarcinoma- Not Otherwise Specified (NOS)	2002	R0	6th	T2	N1	M0	Stage IIB	Dead	Current reformed smoker for < or = 15 years	37	[Not Available]	666	59	7150	WITH TUMOR
TCGA-78-7152-01A	C4	Y	Y	Y	Y	Y	Primary Tumor	MALE	WHITE	[Not Available]	No	R-Upper	Lung Adenocarcinoma Mixed Subtype	2003	R0	6th	T2	N0	M0	Stage IB	Alive	Current reformed smoker for < or = 15 years	40	1202		65	7152	WITH TUMOR
TCGA-78-7153-01A	C4	Y	Y	Y	Y	Y	Primary Tumor	FEMALE	WHITE	[Not Available]	No	R-Upper	Lung Adenocarcinoma Mixed Subtype	2003	R0	6th	T2	N0	M0	Stage IB	Alive	Current reformed smoker for < or = 15 years	20	760		65	7153	[Not Available]
TCGA-78-7154-01A	C1	Y	Y	Y	Y	Y	Primary Tumor	MALE	WHITE	[Not Available]	No	L-Upper	Lung Adenocarcinoma- Not Otherwise Specified (NOS)	2003	R0	6th	T3	N2	M0	Stage IIIA	Dead	Current reformed smoker for < or = 15 years	112.5	[Not Available]	593	72	7154	[Not Available]
TCGA-78-7155-01A	C3	Y	Y	Y	Y	Y	Primary Tumor	MALE	WHITE	[Not Available]	No	L-Upper	Lung Adenocarcinoma- Not Otherwise Specified (NOS)	2005	R0	6th	T2	N0	M0	Stage IB	Dead	Current reformed smoker for < or = 15 years	48	[Not Available]	1171	68	7155	[Not Available]
TCGA-78-7156-01A	C4	Y	Y	Y	Y	Y	Primary Tumor	MALE	WHITE	[Not Available]	No	[Not Available]	Lung Adenocarcinoma Mixed Subtype	2006	R0	6th	T4	N1	M1	Stage IV	Dead	Current reformed smoker for > 15 years	84	[Not Available]	976	62	7156	[Not Available]
TCGA-78-7158-01A	C2	Y	Y	Y	Y	Y	Primary Tumor	FEMALE	WHITE	[Not Available]	No	L-Lower	Lung Adenocarcinoma Mixed Subtype	2007	R1	6th	T4	N2	M0	Stage IIIB	Dead	Current reformed smoker for < or = 15 years	14	[Not Available]	179	59	7158	WITH TUMOR
TCGA-78-7159-01A	C1	Y	Y	Y	Y	Y	Primary Tumor	FEMALE	WHITE	[Not Available]	No	L-Upper	Lung Adenocarcinoma Mixed Subtype	2008	R0	6th	T1	NX	M0	Stage IA	Alive	Current reformed smoker for < or = 15 years	21	1221		60	7159	[Not Available]
TCGA-78-7160-01A	C1	Y	Y	Y	Y	Y	Primary Tumor	MALE	WHITE	[Not Available]	No	R-Lower	Lung Adenocarcinoma Mixed Subtype	2008	R0	6th	T4	N2	M1	Stage IV	Alive	Current reformed smoker for < or = 15 years	43.8	678		61	7160	[Not Available]
TCGA-78-7161-01A	C4	Y	Y	Y	Y	Y	Primary Tumor	FEMALE	WHITE	[Not Available]	No	L-Upper	Lung Adenocarcinoma Mixed Subtype	2011	R1	7th	T3	N0	M0	Stage IIB	Alive	Current reformed smoker for < or = 15 years	27.8	215		69	7161	WITH TUMOR
TCGA-78-7162-01A	C3	Y	Y	Y	Y	Y	Primary Tumor	MALE	WHITE	[Not Available]	No	L-Upper	Lung Adenocarcinoma Mixed Subtype	1991	R0	6th	T1	N0	M0	Stage IA	Dead	Current smoker	12	[Not Available]	3169	75	7162	[Not Available]
TCGA-78-7163-01A	C4	Y	Y	Y	Y	Y	Primary Tumor	MALE	WHITE	[Not Available]	No	R-Lower	Lung Adenocarcinoma- Not Otherwise Specified (NOS)	1992	R0	6th	T2	N0	M0	Stage IB	Alive	Current reformed smoker for < or = 15 years	41	6812		60	7163	TUMOR FREE
TCGA-78-7166-01A	C1	Y	Y	Y	Y	Y	Primary Tumor	MALE	WHITE	[Not Available]	Yes	L-Lower	Lung Adenocarcinoma- Not Otherwise Specified (NOS)	2002	R0	6th	T2	N1	M0	Stage IIB	Dead	Current reformed smoker for > 15 years	38	[Not Available]	258	84	7166	[Not Available]
TCGA-78-7167-01A	C3	Y	Y	Y	Y	Y	Primary Tumor	MALE	WHITE	[Not Available]	No	[Not Available]	Lung Papillary Adenocarcinoma	2002	R0	6th	T2	N0	M1	Stage IV	Dead	Current smoker	64	[Not Available]	2681	77	7167	WITH TUMOR
TCGA-78-7220-01A	C1	Y	Y	Y	Y	N	Primary Tumor	FEMALE	WHITE	[Not Available]	No	L-Upper	Lung Adenocarcinoma Mixed Subtype	2000	R0	6th	T2	N2	M0	Stage IIIA	Dead	Current smoker	35	[Not Available]	807	53	7220	WITH TUMOR
TCGA-78-7535-01A	C4	Y	Y	Y	Y	Y	Primary Tumor	MALE	WHITE	[Not Available]	No	L-Upper	Lung Adenocarcinoma- Not Otherwise Specified (NOS)	2000	R0	6th	T2	N0	M0	Stage IB	Dead	Current smoker	35	[Not Available]	949	45	7535	WITH TUMOR
TCGA-78-7536-01A	C1	Y	Y	Y	Y	Y	Primary Tumor	MALE	WHITE	[Not Available]	No	R-Upper	Lung Adenocarcinoma- Not Otherwise Specified (NOS)	2001	R0	6th	T2	N2	M0	Stage IIIA	Dead	Current reformed smoker for < or = 15 years	44	[Not Available]	244	69	7536	WITH TUMOR
TCGA-78-7537-01A	C4	Y	Y	Y	Y	Y	Primary Tumor	MALE	[Not Available]	[Not Available]	No	R-Upper	Lung Adenocarcinoma Mixed Subtype	2002	R0	6th	T2	N0	M0	Stage IB	Dead	Current reformed smoker for > 15 years	20	[Not Available]	1622	72	7537	[Not Available]
TCGA-78-7539-01A	C2	Y	Y	Y	Y	Y	Primary Tumor	FEMALE	WHITE	[Not Available]	No	R-Upper	Lung Adenocarcinoma Mixed Subtype	2011	R0	7th	T2b	N0	M0	Stage IIA	Alive	Current reformed smoker for > 15 years	2.2	327		75	7539	[Not Available]
TCGA-78-7540-01A	C1	Y	Y	Y	Y	Y	Primary Tumor	FEMALE	WHITE	[Not Available]	No	L-Lower	Lung Bronchioloalveolar Carcinoma Mucinous	1999	R0	6th	T2	N0	M0	Stage IB	Alive	Lifelong Non-smoker	[Not Available]	881		66	7540	[Not Available]
TCGA-78-7542-01A	C1	Y	Y	Y	Y	Y	Primary Tumor	MALE	WHITE	[Not Available]	No	R-Upper	Lung Adenocarcinoma- Not Otherwise Specified (NOS)	1993	R0	6th	T2	N0	M0	Stage IB	Dead	Current smoker	60	[Not Available]	321	56	7542	[Not Available]
TCGA-78-7633-01A	C3	Y	Y	Y	Y	Y	Primary Tumor	MALE	WHITE	[Not Available]	Yes	L-Upper	Lung Adenocarcinoma Mixed Subtype	2009	R0	6th	T2	N0	M0	Stage IA	Alive	Current reformed smoker for < or = 15 years	94	994		67	7633	[Not Available]
TCGA-78-8640-01A	C1	Y	Y	Y	Y	N	Primary Tumor	MALE	[Not Evaluated]	[Not Evaluated]	No	L-Upper	Lung Adenocarcinoma- Not Otherwise Specified (NOS)	1994	R0	6th	T1	N1	M0	Stage IIA	Alive	Current smoker	45	6346		59	8640	TUMOR FREE
TCGA-78-8648-01A	C3	Y	Y	Y	Y	N	Primary Tumor	FEMALE	[Not Evaluated]	[Not Evaluated]	No	R-Upper	Lung Adenocarcinoma- Not Otherwise Specified (NOS)	2002	R0	6th	T3	N0	M0	Stage IIB	Dead	Current smoker	45	[Not Available]	1209	58	8648	[Unknown]
TCGA-78-8660-01A	C3	Y	Y	Y	Y	N	Primary Tumor	MALE	[Not Evaluated]	[Not Evaluated]	Yes, History of Prior Malignancy	R-Lower	Lung Adenocarcinoma- Not Otherwise Specified (NOS)	2005	R0	6th	T2	N1	M0	Stage IIB	Dead	Current reformed smoker for < or = 15 years	11	[Not Available]	321	69	8660	WITH TUMOR
TCGA-80-5607-01A	C1	Y	Y	Y	Y	Y	Primary Tumor	FEMALE	[Not Available]	[Not Available]	Yes	L-Upper	Lung Adenocarcinoma- Not Otherwise Specified (NOS)	2007	R0	6th	T2	N1	M0	Stage IIB	Alive	Current reformed smoker for > 15 years	15	[Not Available]		[Not Available]	5607	WITH TUMOR
TCGA-80-5608-01A	C1	Y	Y	Y	Y	Y	Primary Tumor	FEMALE	[Not Available]	[Not Available]	No	R-Upper	Lung Adenocarcinoma- Not Otherwise Specified (NOS)	2007	R0	6th	T1	N0	M0	Stage IA	Alive	Current smoker	26	[Not Available]		[Not Available]	5608	TUMOR FREE
TCGA-80-5611-01A	C2	Y	Y	Y	Y	Y	Primary Tumor	MALE	[Not Available]	[Not Available]	Yes	L-Upper	Lung Solid Pattern Predominant Adenocarcinoma	2007	R0	6th	T2	N0	M0	Stage IB	Alive	Current reformed smoker for < or = 15 years	60	[Not Available]		[Not Available]	5611	TUMOR FREE
TCGA-86-6562-01A	C4	Y	Y	Y	Y	Y	Primary Tumor	MALE	WHITE	NOT HISPANIC OR LATINO	No	R-Upper	Lung Adenocarcinoma- Not Otherwise Specified (NOS)	2011	R0	7th	T2a	N1	M0	Stage IIA	Alive	Lifelong Non-smoker	[Not Available]	0		52	6562	TUMOR FREE
TCGA-86-6851-01A	C4	Y	Y	Y	Y	Y	Primary Tumor	FEMALE	WHITE	NOT HISPANIC OR LATINO	No	L-Upper	Lung Adenocarcinoma Mixed Subtype	2011	[Not Available]	7th	T1b	N1	M0	Stage IIA	Alive	Current smoker	52	0		73	6851	TUMOR FREE
TCGA-86-7701-01A	C2	Y	Y	Y	Y	Y	Primary Tumor	MALE	WHITE	NOT HISPANIC OR LATINO	No	R-Upper	Lung Adenocarcinoma- Not Otherwise Specified (NOS)	2011	R0	7th	T2	N0	M1	Stage IV	Alive	Lifelong Non-smoker	0	11		66	7701	[Not Available]
TCGA-86-7711-01A	C1	Y	Y	Y	Y	Y	Primary Tumor	MALE	WHITE	HISPANIC OR LATINO	No	R-Lower	Lung Adenocarcinoma- Not Otherwise Specified (NOS)	2011	R0	7th	T2a	N1	M0	Stage IIA	Alive	Current smoker	50	27		70	7711	TUMOR FREE
TCGA-86-7713-01A	C2	Y	Y	Y	Y	Y	Primary Tumor	MALE	WHITE	NOT HISPANIC OR LATINO	No	R-Middle	Lung Adenocarcinoma- Not Otherwise Specified (NOS)	2011	R0	7th	T2b	N0	M0	Stage IIA	Alive	Lifelong Non-smoker	[Not Available]	7		70	7713	TUMOR FREE
TCGA-86-7714-01A	C4	Y	Y	Y	Y	N	Primary Tumor	FEMALE	BLACK OR AFRICAN AMERICAN	NOT HISPANIC OR LATINO	No	R-Lower	Lung Adenocarcinoma Mixed Subtype	2011	R0	7th	T1b	N2	M0	Stage IIIA	Alive	Current smoker	43	0		61	7714	WITH TUMOR
TCGA-86-7953-01A	C1	Y	Y	Y	Y	Y	Primary Tumor	FEMALE	WHITE	NOT HISPANIC OR LATINO	No	L-Upper	Lung Adenocarcinoma- Not Otherwise Specified (NOS)	2011	RX	7th	T1b	N0	M0	Stage IA	Alive	Lifelong Non-smoker	[Not Available]	34		69	7953	WITH TUMOR
TCGA-86-7954-01A	C3	Y	Y	Y	Y	Y	Primary Tumor	FEMALE	WHITE	NOT HISPANIC OR LATINO	No	R-Lower	Lung Bronchioloalveolar Carcinoma Nonmucinous	2011	R0	7th	T2	N0	M0	Stage IB	Alive	Current reformed smoker for > 15 years	8	0		68	7954	TUMOR FREE
TCGA-86-7955-01A	C1	Y	Y	Y	Y	Y	Primary Tumor	MALE	WHITE	NOT HISPANIC OR LATINO	No	R-Lower	Lung Adenocarcinoma- Not Otherwise Specified (NOS)	2011	RX	7th	T2a	N0	M0	Stage IB	Alive	Lifelong Non-smoker	[Not Available]	14		62	7955	TUMOR FREE
TCGA-86-8054-01A	C1	Y	Y	Y	Y	N	Primary Tumor	MALE	WHITE	NOT HISPANIC OR LATINO	No	R-Upper	Lung Acinar Adenocarcinoma	2011	R0	7th	T2b	N1	M0	Stage IIB	Alive	Current smoker	9	19		61	8054	TUMOR FREE
TCGA-86-8055-01A	C3	Y	Y	Y	Y	N	Primary Tumor	MALE	WHITE	NOT HISPANIC OR LATINO	No	L-Upper	Lung Adenocarcinoma- Not Otherwise Specified (NOS)	2011	R0	7th	T2a	N1	M0	Stage IIA	Alive	Current smoker	60	10		79	8055	TUMOR FREE
TCGA-86-8056-01A	C3	Y	Y	Y	Y	N	Primary Tumor	FEMALE	WHITE	NOT HISPANIC OR LATINO	No	Other (please specify)	Lung Adenocarcinoma Mixed Subtype	2011	R0	7th	T4	N0	M0	Stage IIIA	Alive	Current reformed smoker for > 15 years	36	0		63	8056	[Unknown]
TCGA-86-8073-01A	C4	Y	Y	Y	Y	N	Primary Tumor	MALE	WHITE	NOT HISPANIC OR LATINO	No	L-Upper	Lung Bronchioloalveolar Carcinoma Nonmucinous	2011	R0	7th	T2a	N0	M0	Stage IB	Alive	Current smoker	40	13		58	8073	WITH TUMOR
TCGA-86-8074-01A	C4	Y	Y	Y	Y	N	Primary Tumor	FEMALE	WHITE	NOT HISPANIC OR LATINO	No	L-Lower	Lung Adenocarcinoma- Not Otherwise Specified (NOS)	2011	R0	7th	T1b	N1	M0	Stage IIA	Alive	Current smoker	40	24		62	8074	TUMOR FREE
TCGA-86-8075-01A	C4	Y	Y	Y	Y	N	Primary Tumor	FEMALE	WHITE	NOT HISPANIC OR LATINO	No	L-Upper	Lung Adenocarcinoma- Not Otherwise Specified (NOS)	2011	R0	7th	T2	N0	M0	Stage IB	Alive	Lifelong Non-smoker	[Not Available]	43		66	8075	TUMOR FREE
TCGA-86-8076-01A	C4	Y	Y	Y	Y	N	Primary Tumor	MALE	WHITE	NOT HISPANIC OR LATINO	No	R-Upper	Lung Papillary Adenocarcinoma	2011	R0	7th	T1	N0	M0	Stage IA	Alive	Lifelong Non-smoker	[Not Available]	26		42	8076	TUMOR FREE
TCGA-86-8278-01A	C2	Y	Y	Y	Y	N	Primary Tumor	FEMALE	WHITE	NOT HISPANIC OR LATINO	No	L-Lower	Lung Adenocarcinoma- Not Otherwise Specified (NOS)	2011	R0	7th	T2	N1	M0	Stage IIB	Alive	Lifelong Non-smoker	[Not Available]	23		63	8278	WITH TUMOR
TCGA-86-8279-01A	C4	Y	Y	Y	Y	N	Primary Tumor	MALE	WHITE	NOT HISPANIC OR LATINO	No	R-Upper	Lung Adenocarcinoma- Not Otherwise Specified (NOS)	2011	R0	7th	T2a	N1	M0	Stage IIA	Alive	Lifelong Non-smoker	[Not Available]	21		46	8279	TUMOR FREE
TCGA-86-8280-01A	C4	Y	Y	Y	Y	N	Primary Tumor	FEMALE	WHITE	NOT HISPANIC OR LATINO	No	L-Lower	Lung Bronchioloalveolar Carcinoma Nonmucinous	2011	R0	7th	T2b	N0	M0	Stage IIA	Alive	Lifelong Non-smoker	[Not Available]	16		54	8280	WITH TUMOR
TCGA-86-8281-01A	C4	Y	Y	Y	Y	N	Primary Tumor	MALE	WHITE	NOT HISPANIC OR LATINO	No	R-Lower	Lung Adenocarcinoma- Not Otherwise Specified (NOS)	2011	[Not Evaluated]	7th	T1	NX	M0	Stage IA	Alive	Current reformed smoker for > 15 years	30	0		75	8281	TUMOR FREE
TCGA-86-8358-01A	C1	Y	Y	Y	Y	N	Primary Tumor	MALE	WHITE	NOT HISPANIC OR LATINO	No	R-Upper	Lung Adenocarcinoma- Not Otherwise Specified (NOS)	2012	R0	7th	T2a	N0	M0	Stage IB	Alive	Current smoker	20	19		44	8358	TUMOR FREE
TCGA-86-8585-01A	C1	Y	Y	Y	Y	N	Primary Tumor	MALE	WHITE	NOT HISPANIC OR LATINO	No	L-Upper	Lung Solid Pattern Predominant Adenocarcinoma	2012	R0	7th	T2a	N0	M0	Stage IB	Alive	Lifelong Non-smoker	[Not Available]	35		57	8585	TUMOR FREE
TCGA-86-8668-01A	C4	Y	Y	Y	Y	N	Primary Tumor	FEMALE	WHITE	NOT HISPANIC OR LATINO	No	L-Lower	Lung Bronchioloalveolar Carcinoma Mucinous	2012	R0	7th	T1b	N0	M0	Stage IA	Alive	Lifelong Non-smoker	[Not Available]	45		61	8668	WITH TUMOR
TCGA-86-8669-01A	C4	Y	Y	Y	Y	N	Primary Tumor	MALE	WHITE	NOT HISPANIC OR LATINO	No	R-Upper	Lung Adenocarcinoma- Not Otherwise Specified (NOS)	2012	R0	7th	T1b	N0	M0	Stage IA	Alive	Current smoker	47	34		64	8669	TUMOR FREE
TCGA-86-8674-01A	C2	Y	Y	Y	Y	N	Primary Tumor	MALE	WHITE	NOT HISPANIC OR LATINO	No	R-Middle	Lung Papillary Adenocarcinoma	2012	R0	7th	T2a	N1	M0	Stage IIA	Alive	Current reformed smoker for < or = 15 years	37.5	0		50	8674	TUMOR FREE
TCGA-86-A456-01A	C4	Y	Y	Y	Y	N	Primary Tumor	FEMALE	ASIAN	NOT HISPANIC OR LATINO	No	L-Upper	Lung Papillary Adenocarcinoma	2012	R0	7th	T1a	N0	M0	Stage IA	Alive	Current reformed smoker for < or = 15 years	[Not Available]	10		78	A456	TUMOR FREE
TCGA-86-A4D0-01A	C1	Y	Y	Y	Y	N	Primary Tumor	MALE	WHITE	NOT HISPANIC OR LATINO	No	R-Upper	Lung Adenocarcinoma- Not Otherwise Specified (NOS)	2012	R0	7th	T2b	N0	M0	Stage IIA	Alive	Current smoker	[Not Available]	30		48	A4D0	TUMOR FREE
TCGA-86-A4JF-01A	C4	Y	Y	Y	Y	N	Primary Tumor	MALE	WHITE	NOT HISPANIC OR LATINO	No	R-Upper	Lung Adenocarcinoma- Not Otherwise Specified (NOS)	2012	R0	7th	T3	N0	M0	Stage IIB	Alive	Current reformed smoker for < or = 15 years	[Not Available]	0		56	A4JF	TUMOR FREE
TCGA-86-A4P8-01A	C4	Y	Y	Y	Y	N	Primary Tumor	FEMALE	WHITE	NOT HISPANIC OR LATINO	No	R-Lower	Lung Adenocarcinoma- Not Otherwise Specified (NOS)	2012	[Not Evaluated]	7th	T1b	N2	MX	Stage IIIA	Alive	Lifelong Non-smoker	[Not Available]	39		59	A4P8	[Unknown]
TCGA-91-6828-01A	C4	Y	Y	Y	Y	Y	Primary Tumor	MALE	WHITE	NOT HISPANIC OR LATINO	No	L-Lower	Lung Adenocarcinoma- Not Otherwise Specified (NOS)	2011	R0	7th	T1a	N0	M0	Stage IA	Alive	Current reformed smoker for > 15 years	[Not Available]	38		70	6828	[Not Available]
TCGA-91-6829-01A	C2	Y	Y	Y	Y	Y	Primary Tumor	MALE	WHITE	NOT HISPANIC OR LATINO	No	R-Lower	Lung Bronchioloalveolar Carcinoma Nonmucinous	2001	R0	5th	T2	N0	MX	Stage IB	Dead	Current reformed smoker for < or = 15 years	94.5	[Not Available]	1258	78	6829	TUMOR FREE
TCGA-91-6830-01A	C1	Y	Y	Y	Y	Y	Primary Tumor	FEMALE	WHITE	NOT HISPANIC OR LATINO	No	L-Upper	Lung Adenocarcinoma- Not Otherwise Specified (NOS)	2002	[Not Available]	5th	T1	N1	MX	Stage IIA	Alive	Current reformed smoker for < or = 15 years	12	1		65	6830	[Not Available]
TCGA-91-6831-01A	C1	Y	Y	Y	Y	Y	Primary Tumor	MALE	WHITE	NOT HISPANIC OR LATINO	No	R-Middle	Lung Adenocarcinoma- Not Otherwise Specified (NOS)	2001	[Not Available]	5th	T2	N0	MX	Stage IB	Alive	Current smoker	[Not Available]	39		66	6831	[Not Available]
TCGA-91-6835-01A	C4	Y	Y	Y	Y	Y	Primary Tumor	FEMALE	WHITE	NOT HISPANIC OR LATINO	No	R-Lower	Lung Adenocarcinoma- Not Otherwise Specified (NOS)	2010	R0	7th	T1	N0	M0	Stage IA	Alive	Current reformed smoker for > 15 years	25	35		81	6835	[Not Available]
TCGA-91-6836-01A	C2	Y	Y	Y	Y	Y	Primary Tumor	FEMALE	WHITE	NOT HISPANIC OR LATINO	Yes	R-Upper	Lung Adenocarcinoma- Not Otherwise Specified (NOS)	2010	[Not Available]	7th	T2	N0	MX	Stage IB	Alive	Current smoker	50	11		52	6836	[Not Available]
TCGA-91-6840-01A	C3	Y	Y	Y	Y	Y	Primary Tumor	FEMALE	WHITE	NOT HISPANIC OR LATINO	No	R-Upper	Lung Adenocarcinoma- Not Otherwise Specified (NOS)	2011	R0	7th	T1b	N0	M0	Stage IA	Alive	Current reformed smoker for > 15 years	50	0		59	6840	TUMOR FREE
TCGA-91-6847-01A	C1	Y	Y	Y	Y	Y	Primary Tumor	FEMALE	WHITE	NOT HISPANIC OR LATINO	No	R-Lower	Lung Adenocarcinoma- Not Otherwise Specified (NOS)	2002	[Not Available]	5th	T2	N0	MX	Stage IB	Alive	Current reformed smoker for > 15 years	[Not Available]	842		62	6847	[Not Available]
TCGA-91-6848-01A	C2	Y	Y	Y	Y	Y	Primary Tumor	MALE	WHITE	NOT HISPANIC OR LATINO	No	L-Upper	Lung Adenocarcinoma- Not Otherwise Specified (NOS)	2009	[Not Available]	6th	T2	N2	MX	Stage IIIA	Alive	Current reformed smoker for < or = 15 years	[Not Available]	127		59	6848	[Not Available]
TCGA-91-6849-01A	C4	Y	Y	Y	Y	Y	Primary Tumor	FEMALE	BLACK OR AFRICAN AMERICAN	NOT HISPANIC OR LATINO	No	L-Upper	Lung Adenocarcinoma- Not Otherwise Specified (NOS)	2009	[Not Available]	6th	T2	N2	MX	Stage IIIA	Alive	Current reformed smoker for > 15 years	30	35		75	6849	[Not Available]
TCGA-91-7771-01A	C2	Y	Y	Y	Y	Y	Primary Tumor	MALE	WHITE	NOT HISPANIC OR LATINO	Yes	R-Upper	Lung Adenocarcinoma- Not Otherwise Specified (NOS)	2011	[Not Available]	7th	T3	N0	MX	Stage IIB	Alive	Current reformed smoker for < or = 15 years	75	31		62	7771	[Not Available]
TCGA-91-8496-01A	C4	Y	Y	Y	Y	N	Primary Tumor	FEMALE	WHITE	NOT HISPANIC OR LATINO	No	L-Lower	Lung Bronchioloalveolar Carcinoma Nonmucinous	2011	[Not Evaluated]	7th	T2a	NX	MX	Stage IB	Alive	Lifelong Non-smoker	[Not Available]	197		63	8496	[Unknown]
TCGA-91-8499-01A	C2	Y	Y	Y	Y	N	Primary Tumor	FEMALE	WHITE	NOT HISPANIC OR LATINO	No	L-Lower	Lung Adenocarcinoma- Not Otherwise Specified (NOS)	2011	[Not Evaluated]	7th	T1b	N0	MX	Stage IA	Alive	Current smoker	90	36		76	8499	[Unknown]
TCGA-91-A4BC-01A	C2	Y	Y	Y	Y	N	Primary Tumor	MALE	WHITE	NOT HISPANIC OR LATINO	Yes, History of Synchronous and or Bilateral Malignancy	R-Upper	Lung Adenocarcinoma- Not Otherwise Specified (NOS)	2012	[Not Evaluated]	7th	T2b	N0	MX	Stage IIA	Alive	Current reformed smoker for < or = 15 years	30	44		59	A4BC	[Unknown]
TCGA-91-A4BD-01A	C4	Y	Y	Y	Y	N	Primary Tumor	MALE	WHITE	NOT HISPANIC OR LATINO	No	L-Lower	Lung Adenocarcinoma- Not Otherwise Specified (NOS)	2012	RX	7th	T1b	N1	MX	Stage IIA	Alive	Current reformed smoker for > 15 years	[Not Available]	218		78	A4BD	TUMOR FREE
TCGA-93-7347-01A	C4	Y	Y	Y	Y	N	Primary Tumor	FEMALE	WHITE	NOT HISPANIC OR LATINO	No	R-Upper	Lung Adenocarcinoma Mixed Subtype	2011	R0	7th	T1a	N0	MX	Stage IA	Alive	Current reformed smoker for > 15 years	11	297		76	7347	TUMOR FREE
TCGA-93-7348-01A	C3	Y	Y	Y	Y	Y	Primary Tumor	FEMALE	WHITE	NOT HISPANIC OR LATINO	No	R-Upper	Lung Adenocarcinoma- Not Otherwise Specified (NOS)	2011	R0	7th	T1a	N0	MX	Stage IA	Alive	Current reformed smoker for < or = 15 years	42	127		75	7348	TUMOR FREE
TCGA-93-8067-01A	C1	Y	Y	Y	Y	N	Primary Tumor	MALE	ASIAN	NOT HISPANIC OR LATINO	Yes, History of Prior Malignancy	L-Lower	Lung Adenocarcinoma- Not Otherwise Specified (NOS)	2011	RX	7th	T2a	N0	MX	Stage IB	Alive	Current reformed smoker for < or = 15 years	20	186		77	8067	TUMOR FREE
TCGA-93-A4JN-01A	C3	Y	Y	Y	Y	N	Primary Tumor
TCGA-93-A4JO-01A	C3	Y	Y	Y	Y	N	Primary Tumor	MALE	WHITE	NOT HISPANIC OR LATINO	No	R-Lower	Lung Adenocarcinoma Mixed Subtype	2012	RX	7th	T1a	N0	MX	Stage IA	Dead		50	[Not Available]	33	70	A4JO	TUMOR FREE
TCGA-93-A4JP-01A	C4	Y	Y	Y	Y	N	Primary Tumor	MALE	ASIAN	NOT HISPANIC OR LATINO	No	R-Lower	Lung Papillary Adenocarcinoma	2012	RX	7th	TX	NX	M1b	Stage IV	Alive		[Not Available]	269	[Not Applicable]	64	A4JP	WITH TUMOR
TCGA-93-A4JQ-01A	C1	Y	Y	Y	Y	N	Primary Tumor	MALE	WHITE	NOT HISPANIC OR LATINO	Yes, History of Prior Malignancy	R-Upper	Lung Acinar Adenocarcinoma	2012	RX	7th	T1b	N0	MX	Stage IA	Alive		[Not Available]	100	[Not Applicable]	49	A4JQ	TUMOR FREE
TCGA-95-7039-01A	C1	Y	Y	Y	Y	Y	Primary Tumor	FEMALE	WHITE	NOT HISPANIC OR LATINO	No	R-Upper	Lung Adenocarcinoma Mixed Subtype	2011	[Not Available]	7th	T3	N0	MX	Stage IIB	Alive	Current smoker	34	34		54	7039	TUMOR FREE
TCGA-95-7043-01A	C4	Y	Y	Y	Y	Y	Primary Tumor	FEMALE	WHITE	NOT HISPANIC OR LATINO	Yes	R-Upper	Lung Adenocarcinoma Mixed Subtype	2011	[Not Available]	7th	TX	N0	MX	Stage IA	Alive	Current reformed smoker for < or = 15 years	40	2		63	7043	[Not Available]
TCGA-95-7562-01A	C4	Y	Y	Y	Y	N	Primary Tumor	MALE	BLACK OR AFRICAN AMERICAN	NOT HISPANIC OR LATINO	Yes, History of Prior Malignancy	R-Lower	Lung Adenocarcinoma- Not Otherwise Specified (NOS)	2011	RX	7th	T2a	N1	M0	Stage IIA	Dead		10	[Not Available]	87	71	7562	TUMOR FREE
TCGA-95-7567-01A	C2	Y	Y	Y	Y	Y	Primary Tumor	MALE	WHITE	NOT HISPANIC OR LATINO	No	R-Upper	Lung Adenocarcinoma Mixed Subtype	2011	[Not Available]	7th	T2b	N1	M0	Stage IIB	Alive	Current reformed smoker for < or = 15 years	[Not Available]	163		61	7567	TUMOR FREE
TCGA-95-7944-01A	C2	Y	Y	Y	Y	Y	Primary Tumor	MALE	WHITE	NOT HISPANIC OR LATINO	No	L-Lower	Lung Adenocarcinoma- Not Otherwise Specified (NOS)	2011	R0	7th	T1a	N0	M0	Stage IA	Alive	Current smoker	50	21		71	7944	TUMOR FREE
TCGA-95-7947-01A	C4	Y	Y	Y	Y	Y	Primary Tumor	MALE	WHITE	NOT HISPANIC OR LATINO	Yes	L-Upper	Lung Adenocarcinoma Mixed Subtype	2011	R0	7th	T1a	N0	M0	Stage IA	Alive	Current reformed smoker for < or = 15 years	100	40		67	7947	TUMOR FREE
TCGA-95-7948-01A	C2	Y	Y	Y	Y	Y	Primary Tumor	FEMALE	WHITE	NOT HISPANIC OR LATINO	Yes	R-Lower	Lung Adenocarcinoma Mixed Subtype	2011	R0	7th	T2a	N0	M0	Stage IB	Alive	Current reformed smoker for > 15 years	0.15	133		42	7948	TUMOR FREE
TCGA-95-8039-01A	C4	Y	Y	Y	Y	N	Primary Tumor	MALE	WHITE	NOT HISPANIC OR LATINO	No	R-Upper	Lung Acinar Adenocarcinoma	2012	RX	7th	T1	N0	MX	Stage IA	Alive	Lifelong Non-smoker	[Not Available]	27		72	8039	TUMOR FREE
TCGA-97-7546-01A	C4	Y	Y	Y	Y	Y	Primary Tumor	FEMALE	WHITE	NOT HISPANIC OR LATINO	No	L-Upper	Lung Acinar Adenocarcinoma	2008	R0	6th	T1	N0	MX	Stage IA	Alive	Current reformed smoker for > 15 years	25	964		76	7546	TUMOR FREE
TCGA-97-7547-01A	C4	Y	Y	Y	Y	N	Primary Tumor	FEMALE	WHITE	NOT HISPANIC OR LATINO	No	R-Upper	Lung Papillary Adenocarcinoma	2007	[Not Available]	6th	T2	N0	MX	Stage IB	Alive	Current reformed smoker for > 15 years	30	1435		67	7547	TUMOR FREE
TCGA-97-7552-01A	C1	Y	Y	Y	Y	Y	Primary Tumor	MALE	WHITE	NOT HISPANIC OR LATINO	No	L-Lower	Lung Bronchioloalveolar Carcinoma Mucinous	2007	[Not Available]	6th	T2	N0	MX	Stage IB	Alive	Current reformed smoker for > 15 years	40	1476		70	7552	TUMOR FREE
TCGA-97-7553-01A	C4	Y	Y	Y	Y	Y	Primary Tumor	FEMALE	WHITE	NOT HISPANIC OR LATINO	No	L-Lower	Lung Bronchioloalveolar Carcinoma Nonmucinous	2007	[Not Available]	6th	T1	N0	MX	Stage IA	Alive	Current smoker	20	1332		58	7553	TUMOR FREE
TCGA-97-7554-01A	C4	Y	Y	Y	Y	Y	Primary Tumor	FEMALE	WHITE	NOT HISPANIC OR LATINO	No	L-Lower	Lung Papillary Adenocarcinoma	2010	R0	7th	T2a	N2	M0	Stage IIIA	Alive	Current reformed smoker for > 15 years	30	264		83	7554	TUMOR FREE
TCGA-97-7937-01A	C4	Y	Y	Y	Y	Y	Primary Tumor	MALE	WHITE	NOT HISPANIC OR LATINO	No	L-Upper	Lung Micropapillary Adenocarcinoma	2011	[Not Available]	7th	T2a	N0	MX	Stage IB	Alive	Current reformed smoker for > 15 years	35	181		65	7937	[Not Available]
TCGA-97-7938-01A	C3	Y	Y	Y	Y	Y	Primary Tumor	FEMALE	WHITE	NOT HISPANIC OR LATINO	No	R-Upper	Lung Bronchioloalveolar Carcinoma Nonmucinous	2011	R0	7th	T1a	N0	MX	Stage IA	Dead	Current reformed smoker for > 15 years	40	[Not Available]	18	76	7938	TUMOR FREE
TCGA-97-7941-01A	C1	Y	Y	Y	Y	Y	Primary Tumor	FEMALE	WHITE	NOT HISPANIC OR LATINO	No	L-Upper	Lung Acinar Adenocarcinoma	2011	R0	7th	T1b	N0	MX	Stage IA	Alive	Current reformed smoker for > 15 years	22.5	22		72	7941	TUMOR FREE
TCGA-97-8171-01A	C2	Y	Y	Y	Y	N	Primary Tumor	MALE	ASIAN	NOT HISPANIC OR LATINO	No	Other (please specify)	Lung Papillary Adenocarcinoma	2011	[Not Available]	7th	T2a	N2	M1a	Stage IV	Alive	Current smoker	65	107		81	8171	[Not Available]
TCGA-97-8172-01A	C4	Y	Y	Y	Y	N	Primary Tumor	FEMALE	WHITE	NOT HISPANIC OR LATINO	Yes, History of Prior Malignancy	R-Upper	Lung Acinar Adenocarcinoma	2011	[Not Available]	7th	T2a	N0	M0	Stage IB	Alive	Current reformed smoker for > 15 years	20	182		75	8172	[Not Available]
TCGA-97-8174-01A	C4	Y	Y	Y	Y	N	Primary Tumor	MALE	WHITE	NOT HISPANIC OR LATINO	No	R-Upper	Lung Papillary Adenocarcinoma	2011	[Not Available]	7th	T2b	N0	M0	Stage IIA	Dead	Current reformed smoker for > 15 years	40	[Not Available]	164	67	8174	[Not Available]
TCGA-97-8175-01A	C1	Y	Y	Y	Y	N	Primary Tumor	FEMALE	WHITE	NOT HISPANIC OR LATINO	No	L-Upper	Lung Solid Pattern Predominant Adenocarcinoma	2011	[Not Available]	7th	T2a	N0	M0	Stage IB	Alive	Current Reformed Smoker, Duration Not Specified	[Not Available]	87		55	8175	TUMOR FREE
TCGA-97-8176-01A	C1	Y	Y	Y	Y	N	Primary Tumor
TCGA-97-8177-01A	C4	Y	Y	Y	Y	N	Primary Tumor	FEMALE	WHITE	NOT HISPANIC OR LATINO	No	L-Lower	Lung Adenocarcinoma Mixed Subtype	2012	[Not Available]	7th	T2a	N0	M0	Stage IB	Alive	Lifelong Non-smoker	[Not Available]	147		59	8177	[Not Available]
TCGA-97-8179-01A	C2	Y	Y	Y	Y	N	Primary Tumor	MALE	WHITE	NOT HISPANIC OR LATINO	No	R-Upper	Lung Acinar Adenocarcinoma	2012	[Not Available]	7th	T1a	N0	M0	Stage IA	Alive	Current reformed smoker for > 15 years	60	15		72	8179	[Not Available]
TCGA-97-8552-01A	C4	Y	Y	Y	Y	N	Primary Tumor	FEMALE	WHITE	NOT HISPANIC OR LATINO	No	L-Lower	Lung Bronchioloalveolar Carcinoma Nonmucinous	2012	[Not Evaluated]	7th	T1a	N0	MX	Stage I	Alive	Lifelong Non-smoker	[Not Available]	115		55	8552	TUMOR FREE
TCGA-97-A4LX-01A	C4	Y	Y	Y	Y	N	Primary Tumor
TCGA-97-A4M1-01A	C4	Y	Y	Y	Y	N	Primary Tumor
TCGA-97-A4M2-01A	C4	Y	Y	Y	Y	N	Primary Tumor	MALE	WHITE	NOT HISPANIC OR LATINO	Yes, History of Prior Malignancy	R-Middle	Lung Adenocarcinoma Mixed Subtype	2012	R0	7th	T1a	N0	M0	Stage IA	Alive	Current smoker	100	197		66	A4M2	TUMOR FREE
TCGA-97-A4M3-01A	C4	Y	Y	Y	Y	N	Primary Tumor
TCGA-97-A4M5-01A	C1	Y	Y	Y	Y	N	Primary Tumor
TCGA-97-A4M6-01A	C4	Y	Y	Y	Y	N	Primary Tumor
TCGA-97-A4M7-01A	C3	Y	Y	Y	Y	N	Primary Tumor	MALE	WHITE	NOT HISPANIC OR LATINO	Yes, History of Synchronous and or Bilateral Malignancy	R-Middle	Lung Adenocarcinoma Mixed Subtype	2012	R0	7th	T1b	N0	M0	Stage IA	Alive	Current reformed smoker for > 15 years	40	271		74	A4M7	TUMOR FREE
TCGA-99-7458-01A	C4	Y	Y	Y	Y	Y	Primary Tumor	FEMALE	WHITE	NOT HISPANIC OR LATINO	No	R-Lower	Lung Bronchioloalveolar Carcinoma Nonmucinous	2010	R0	7th	T4	N0	M0	Stage IIIA	Alive	Current reformed smoker for < or = 15 years	52	251		74	7458	TUMOR FREE
TCGA-99-8025-01A	C4	Y	Y	Y	Y	N	Primary Tumor	FEMALE	BLACK OR AFRICAN AMERICAN	NOT HISPANIC OR LATINO	No	R-Upper	Lung Adenocarcinoma- Not Otherwise Specified (NOS)	2010	R0	7th	T3	N2	M0	Stage IIIA	Alive	Current reformed smoker for < or = 15 years	20	427		72	8025	TUMOR FREE
TCGA-99-8028-01A	C4	Y	Y	Y	Y	N	Primary Tumor	FEMALE	BLACK OR AFRICAN AMERICAN	NOT HISPANIC OR LATINO	No	L-Upper	Lung Adenocarcinoma- Not Otherwise Specified (NOS)	2011	R0	7th	T1a	N0	M0	Stage IA	Alive	Current reformed smoker for < or = 15 years	30	459		50	8028	TUMOR FREE
TCGA-99-8032-01A	C4	Y	Y	Y	Y	N	Primary Tumor	MALE	WHITE	NOT HISPANIC OR LATINO	No	R-Upper	Lung Adenocarcinoma- Not Otherwise Specified (NOS)	2011	R0	7th	T1a	N0	M0	Stage IA	Alive	Current smoker	90	44		61	8032	TUMOR FREE
TCGA-99-8033-01A	C2	Y	Y	Y	Y	N	Primary Tumor	FEMALE	WHITE	NOT HISPANIC OR LATINO	No	R-Upper	Lung Adenocarcinoma- Not Otherwise Specified (NOS)	2011	R0	7th	TX	NX	M1	Stage IV	Alive	Lifelong Non-smoker	[Not Available]	170		74	8033	WITH TUMOR
TCGA-J2-8192-01A	C3	Y	Y	Y	Y	N	Primary Tumor	FEMALE	WHITE	NOT HISPANIC OR LATINO	Yes, History of Prior Malignancy	L-Upper	Lung Adenocarcinoma- Not Otherwise Specified (NOS)	2011	[Not Available]	7th	T2a	N1	MX	Stage IIA	Alive	Lifelong Non-smoker	[Not Available]	154		65	8192	TUMOR FREE
TCGA-J2-8194-01A	C4	Y	Y	Y	Y	N	Primary Tumor	FEMALE	WHITE	NOT HISPANIC OR LATINO	Yes, History of Prior Malignancy	R-Lower	Lung Adenocarcinoma Mixed Subtype	2011	[Not Available]	7th	T3	N0	MX	Stage IIB	Alive	Current reformed smoker for > 15 years	20	114		69	8194	[Unknown]
TCGA-J2-A4AD-01A	C3	Y	Y	Y	Y	N	Primary Tumor	FEMALE	WHITE	NOT HISPANIC OR LATINO	No	L-Upper	Lung Adenocarcinoma- Not Otherwise Specified (NOS)	2012	RX	7th	T1a	N0	MX	Stage IA	Alive	Current smoker	120	287		61	A4AD	TUMOR FREE
TCGA-J2-A4AE-01A	C4	Y	Y	Y	Y	N	Primary Tumor	FEMALE	WHITE	NOT HISPANIC OR LATINO	No	L-Upper	Lung Adenocarcinoma- Not Otherwise Specified (NOS)	2012	R0	7th	T1a	N0	MX	Stage IA	Alive	Lifelong Non-smoker	[Not Available]	282		77	A4AE	TUMOR FREE
TCGA-J2-A4AG-01A	C4	Y	Y	Y	Y	N	Primary Tumor	FEMALE	WHITE	NOT HISPANIC OR LATINO	No	L-Upper	Lung Adenocarcinoma- Not Otherwise Specified (NOS)	2012	R0	7th	T1b	N0	MX	Stage IA	Alive	Current reformed smoker for > 15 years	25	238		66	A4AG	TUMOR FREE
TCGA-L4-A4E5-01A	C2	Y	Y	Y	Y	N	Primary Tumor	FEMALE	WHITE	NOT HISPANIC OR LATINO	No	L-Upper	Lung Adenocarcinoma- Not Otherwise Specified (NOS)	2012	R0	7th	T1	N0	M0	Stage I	Alive	Current reformed smoker for < or = 15 years	33	213		48	A4E5	TUMOR FREE
TCGA-L4-A4E6-01A	C4	Y	Y	Y	Y	N	Primary Tumor	MALE	WHITE	NOT HISPANIC OR LATINO	No	R-Upper	Lung Adenocarcinoma- Not Otherwise Specified (NOS)	2012	R0	7th	T1	N0	M0	Stage IA	Alive	Current reformed smoker for > 15 years	30	76		67	A4E6	TUMOR FREE
TCGA-L9-A443-01A	C4	Y	Y	Y	Y	N	Primary Tumor	FEMALE	WHITE	NOT HISPANIC OR LATINO	Yes, History of Prior Malignancy	L-Lower	Lung Adenocarcinoma- Not Otherwise Specified (NOS)	2012	R0	7th	T1a	N0	MX	Stage IA	Alive	Current reformed smoker for < or = 15 years	90	116		63	A443	[Not Available]
TCGA-L9-A444-01A	C2	Y	Y	Y	Y	N	Primary Tumor	FEMALE	WHITE	NOT HISPANIC OR LATINO	Yes, History of Prior Malignancy	R-Upper	Lung Adenocarcinoma- Not Otherwise Specified (NOS)	2012	R0	7th	T1a	N0	MX	Stage IA	Alive	Current smoker	10	6		60	A444	[Not Available]
TCGA-MN-A4N1-01A	C3	Y	Y	Y	Y	N	Primary Tumor	MALE	BLACK OR AFRICAN AMERICAN	NOT HISPANIC OR LATINO	Yes, History of Prior Malignancy	R-Upper	Lung Adenocarcinoma- Not Otherwise Specified (NOS)	2011	R0	7th	T2a	N1	M0	Stage IIA	Alive	Current smoker	[Not Available]	285		60	A4N1	[Unknown]
TCGA-MN-A4N4-01A	C3	Y	Y	Y	Y	N	Primary Tumor	MALE	WHITE	NOT HISPANIC OR LATINO	No	L-Upper	Lung Adenocarcinoma- Not Otherwise Specified (NOS)	2010	R0	7th	T1b	N0	M0	Stage IA	Alive	Current smoker	[Not Available]	622		57	A4N4	[Unknown]
TCGA-MN-A4N5-01A	C4	Y	Y	Y	Y	N	Primary Tumor	MALE	WHITE	NOT HISPANIC OR LATINO	No	L-Upper	Lung Adenocarcinoma- Not Otherwise Specified (NOS)	2011	R0	7th	T1a	N0	M0	Stage IA	Alive	Current reformed smoker for < or = 15 years	[Not Available]	353		63	A4N5	[Unknown]
TCGA-MP-A4SV-01A	C2	Y	Y	Y	Y	N	Primary Tumor	MALE	[Unknown]	[Unknown]	No	L-Lower	Lung Adenocarcinoma- Not Otherwise Specified (NOS)	2001	R0	5th	T2	N0	M0	Stage IB	Dead	Current smoker	110	[Not Available]	2620	67	A4SV	[Unknown]
TCGA-MP-A4SW-01A	C4	Y	Y	Y	Y	N	Primary Tumor	MALE	WHITE	[Unknown]	No	L-Upper	Lung Adenocarcinoma- Not Otherwise Specified (NOS)	2002	R0	5th	T2	N1	M0	Stage IIB	Dead	Current reformed smoker for > 15 years	15	[Not Available]	1778	53	A4SW	[Unknown]
TCGA-MP-A4SY-01A	C1	Y	Y	Y	Y	N	Primary Tumor	MALE	WHITE	NOT HISPANIC OR LATINO	No	R-Lower	Lung Adenocarcinoma- Not Otherwise Specified (NOS)	2002	R0	5th	T2	N1	M0	Stage IIB	Dead	Current reformed smoker for < or = 15 years	40	[Not Available]	1501	61	A4SY	TUMOR FREE
TCGA-MP-A4T7-01A	C1	Y	Y	Y	Y	N	Primary Tumor	FEMALE	[Unknown]	[Unknown]	No	R-Lower	Lung Adenocarcinoma- Not Otherwise Specified (NOS)	2005	R0	6th	T2	N0	M1	Stage IV	Dead	Current reformed smoker for < or = 15 years	50	[Not Available]	167	75	A4T7	[Unknown]
TCGA-MP-A4T8-01A	C2	Y	Y	Y	Y	N	Primary Tumor	MALE	[Unknown]	[Unknown]	Yes, History of Prior Malignancy	L-Upper	Lung Adenocarcinoma- Not Otherwise Specified (NOS)	2006	R0	6th	T2	N2	M0	Stage IIIA	Dead	Current reformed smoker for > 15 years	25	[Not Available]	161	68	A4T8	[Unknown]
TCGA-MP-A4T9-01A	C4	Y	Y	Y	Y	N	Primary Tumor	FEMALE	WHITE	NOT HISPANIC OR LATINO	No	L-Upper	Lung Adenocarcinoma- Not Otherwise Specified (NOS)	2006	RX	6th	T2	N2	MX	Stage IIIA	Dead	Current reformed smoker for < or = 15 years	24	[Not Available]	1265	54	A4T9	WITH TUMOR
TCGA-MP-A4TA-01A	C1	Y	Y	Y	Y	N	Primary Tumor	FEMALE	WHITE	NOT HISPANIC OR LATINO	Yes, History of Prior Malignancy	R-Upper	Lung Adenocarcinoma- Not Otherwise Specified (NOS)	2006	R0	6th	T1	N0	M0	Stage IA	Dead	Current reformed smoker for < or = 15 years	55	[Not Available]	950	75	A4TA	WITH TUMOR
TCGA-MP-A4TC-01A	C1	Y	Y	Y	Y	N	Primary Tumor	MALE	WHITE	NOT HISPANIC OR LATINO	Yes, History of Prior Malignancy	R-Middle	Lung Adenocarcinoma- Not Otherwise Specified (NOS)	2008	R0	6th	T1	N2	M0	Stage IIIA	Dead	Current reformed smoker for > 15 years	125	[Not Available]	74	77	A4TC	TUMOR FREE
TCGA-MP-A4TI-01A	C1	Y	Y	Y	Y	N	Primary Tumor	MALE	WHITE	NOT HISPANIC OR LATINO	No	R-Lower	Lung Adenocarcinoma- Not Otherwise Specified (NOS)	2010	R0	7th	T2a	N1	M0	Stage IIA	Dead	Current reformed smoker for > 15 years	35	[Not Available]	429	72	A4TI	WITH TUMOR
TCGA-MP-A4TK-01A	C3	Y	Y	Y	Y	N	Primary Tumor	FEMALE	[Unknown]	[Unknown]	No	R-Lower	Lung Adenocarcinoma- Not Otherwise Specified (NOS)	2002	R0	5th	T2	N1	MX	Stage IIB	Dead	Current reformed smoker for < or = 15 years	28	[Not Available]	582	56	A4TK	WITH TUMOR
TCGA-05-4425-01A	C4	Y	Y	Y	Y	N	Primary Tumor	FEMALE	[Not Available]	[Not Available]	No	R-Middle	Lung Adenocarcinoma Mixed Subtype	2008	R1	6th	T2	N0	M1	Stage IV	Alive	Current reformed smoker for > 15 years	28	669		70	4425	[Not Available]
TCGA-73-4658-01A	C4	Y	Y	Y	Y	Y	Primary Tumor	FEMALE	WHITE	NOT HISPANIC OR LATINO	Yes	L-Lower	Lung Adenocarcinoma- Not Otherwise Specified (NOS)	2004	R0	6th	T2	N0	M0	Stage IB	Dead	Current reformed smoker for > 15 years	25	1600	1600	80	4658	TUMOR FREE
TCGA-78-7143-01A	C4	Y	Y	Y	Y	Y	Primary Tumor	FEMALE	WHITE	[Not Available]	No	L-Upper	Lung Bronchioloalveolar Carcinoma Nonmucinous	1992	R0	6th	T2	N0	M0	Stage IB	Dead	Lifelong Non-smoker	[Not Available]	[Not Available]	4961	62	7143	WITH TUMOR
TCGA-55-8506-01A	C4	Y	N	Y	Y	N	Primary Tumor	FEMALE	WHITE	NOT HISPANIC OR LATINO	No	R-Upper	Lung Adenocarcinoma- Not Otherwise Specified (NOS)	2012	R0	7th	T3	N0	MX	Stage IIB	Alive		[Not Available]	11		62	8506	[Unknown]
TCGA-55-8514-01A	C4	Y	N	Y	Y	N	Primary Tumor	FEMALE	BLACK OR AFRICAN AMERICAN	NOT HISPANIC OR LATINO	No	R-Upper	Lung Adenocarcinoma- Not Otherwise Specified (NOS)	2012	R0	7th	T2a	N0	MX	Stage IB	Alive		20	202		70	8514	TUMOR FREE
TCGA-55-8621-01A	C3	Y	N	Y	Y	N	Primary Tumor	FEMALE	WHITE	NOT HISPANIC OR LATINO	Yes, History of Prior Malignancy	L-Lower	Lung Adenocarcinoma- Not Otherwise Specified (NOS)	2012	R0	7th	T1a	N0	MX	Stage IA	Alive		30	106		75	8621	TUMOR FREE
TCGA-62-8394-01A	C1	Y	N	Y	Y	N	Primary Tumor	FEMALE	WHITE	NOT HISPANIC OR LATINO	No	L-Lower	Lung Adenocarcinoma Mixed Subtype	2008	R0	6th	T4	N2	M0	Stage IIIB	Dead		[Not Available]	[Not Available]	139	65	8394	TUMOR FREE
TCGA-62-8397-01A	C2	Y	N	Y	Y	N	Primary Tumor	FEMALE	WHITE	NOT HISPANIC OR LATINO	No	R-Lower	Lung Adenocarcinoma Mixed Subtype	2008	R0	6th	T3	N0	M0	Stage IIB	Alive		[Not Available]	940		70	8397	TUMOR FREE
TCGA-62-8398-01A	C1	Y	N	Y	Y	N	Primary Tumor	MALE	WHITE	NOT HISPANIC OR LATINO	No	R-Lower	Lung Adenocarcinoma Mixed Subtype	2007	R0	6th	T2	N2	M0	Stage IIIA	Dead		20	[Not Available]	444	55	8398	TUMOR FREE
TCGA-62-8399-01A	C4	Y	N	Y	Y	N	Primary Tumor	MALE	WHITE	NOT HISPANIC OR LATINO	No	L-Upper	Lung Papillary Adenocarcinoma	2006	R0	6th	T2	N2	M0	Stage IIIA	Alive		70	2093		62	8399	TUMOR FREE
TCGA-62-8402-01A	C4	Y	N	Y	Y	N	Primary Tumor	FEMALE	WHITE	NOT HISPANIC OR LATINO	No	R-Upper	Lung Adenocarcinoma Mixed Subtype	2008	R0	6th	T2	N2	M0	Stage IIIA	Alive		[Not Available]	1445		73	8402	WITH TUMOR
TCGA-69-8253-01A	C3	Y	N	Y	Y	N	Primary Tumor	FEMALE	BLACK OR AFRICAN AMERICAN	NOT HISPANIC OR LATINO	No	R-Lower	Lung Adenocarcinoma Mixed Subtype	2012	[Not Available]	7th	T1a	N1	MX	Stage IIB	Alive		7.8	100		59	8253	[Unknown]
TCGA-69-8453-01A	C1	Y	N	Y	Y	N	Primary Tumor
TCGA-71-8520-01A	C2	Y	N	N	Y	N	Primary Tumor	FEMALE	ASIAN	NOT HISPANIC OR LATINO	No	L-Upper	Lung Adenocarcinoma- Not Otherwise Specified (NOS)	2011	R0	7th	T2	N0	M0	Stage IB	Alive		[Not Available]	3		60	8520	TUMOR FREE
TCGA-78-8655-01A	C4	Y	N	Y	Y	N	Primary Tumor	FEMALE	[Not Evaluated]	[Not Evaluated]	No	L-Lower	Lung Adenocarcinoma Mixed Subtype	2003	R0	6th	T1	N0	M0	Stage IA	Alive		10	2360		77	8655	[Unknown]
TCGA-78-8662-01A	C2	Y	N	Y	Y	N	Primary Tumor	FEMALE	[Not Evaluated]	[Not Evaluated]	No	R-Upper	Lung Adenocarcinoma- Not Otherwise Specified (NOS)	2000	R0	6th	T2	N0	M0	Stage IB	Dead		45	[Not Available]	3361	53	8662	[Unknown]
TCGA-83-5908-01A	C1	Y	N	Y	Y	Y	Primary Tumor	FEMALE	WHITE	NOT HISPANIC OR LATINO	No	L-Upper	Lung Adenocarcinoma- Not Otherwise Specified (NOS)	2009	R0	6th	T1	N0	M0	Stage IA	Alive		69	420		59	5908	TUMOR FREE
TCGA-86-8359-01A	C4	Y	N	Y	Y	N	Primary Tumor	MALE	WHITE	NOT HISPANIC OR LATINO	No	L-Lower	Lung Adenocarcinoma- Not Otherwise Specified (NOS)	2012	R0	7th	T3	N2	M0	Stage IIIA	Alive		36	26		52	8359	TUMOR FREE
TCGA-86-8671-01A	C4	Y	N	Y	Y	N	Primary Tumor	FEMALE	WHITE	NOT HISPANIC OR LATINO	No	R-Upper	Lung Papillary Adenocarcinoma	2012	R0	7th	T2b	N1	M0	Stage IIB	Alive		[Not Available]	18		72	8671	WITH TUMOR
TCGA-86-8672-01A	C1	Y	N	Y	Y	N	Primary Tumor	MALE	WHITE	NOT HISPANIC OR LATINO	No	R-Upper	Lung Adenocarcinoma- Not Otherwise Specified (NOS)	2012	R0	7th	T3	N0	M0	Stage IIB	Alive		[Not Available]	15		59	8672	TUMOR FREE
TCGA-86-8673-01A	C1	Y	N	Y	Y	N	Primary Tumor	MALE	WHITE	NOT HISPANIC OR LATINO	No	L-Upper	Lung Bronchioloalveolar Carcinoma Nonmucinous	2011	R0	7th	T2	N0	M0	Stage IB	Alive		54	0		61	8673	TUMOR FREE
TCGA-86-A4P7-01A	C4	Y	N	Y	Y	N	Primary Tumor	FEMALE	WHITE	NOT HISPANIC OR LATINO	No	L-Lower	Lung Adenocarcinoma- Not Otherwise Specified (NOS)	2012	R0	7th	T2a	N0	M0	Stage IB	Alive		[Not Available]	14		63	A4P7	TUMOR FREE
TCGA-91-8497-01A	C4	Y	N	Y	Y	N	Primary Tumor	FEMALE	WHITE	NOT HISPANIC OR LATINO	No	R-Upper	Lung Adenocarcinoma- Not Otherwise Specified (NOS)	2012	[Not Evaluated]	7th	T1a	N0	MX	Stage IA	Alive		[Not Available]	174		75	8497	[Unknown]
TCGA-95-8494-01A	C2	Y	N	Y	Y	N	Primary Tumor	MALE	WHITE	NOT HISPANIC OR LATINO	No	R-Middle	Lung Adenocarcinoma- Not Otherwise Specified (NOS)	2012	[Not Evaluated]	7th	T2a	N1	M0	Stage IIA	Alive		[Not Available]	71		67	8494	[Unknown]
TCGA-97-8547-01A	C2	Y	N	Y	Y	N	Primary Tumor	FEMALE	[Not Evaluated]	[Not Evaluated]	No	R-Lower	Lung Micropapillary Adenocarcinoma	2012	[Not Evaluated]	7th	T2a	N2	MX	Stage IIIA	Alive		[Not Available]	148		78	8547	[Not Available]
TCGA-97-A4M0-01A	C4	Y	N	Y	Y	N	Primary Tumor

## Sheet: Supplemental Table 6A
Gene Symbol	Stdev Filter (Q3=495.15413)	Selected	FDR<5%	d(i)	Geom mean of intensities in class 1	Geom mean of intensities in class 2	Fold-change (C1 vs Other)
SERPINB5	1009.89	YES	YES	18.35	692.53	9.43	73.4
AKR1B10	8849.1	YES	YES	7.509	421.28	20.5	20.55
UGT1A10	1125.96	YES	YES	12.458	77.59	4.56	17
KLK6	616.835	YES	YES	8.899	65.14	4.65	14.01
KRT6B	1333.4	YES	YES	8.656	105.87	7.63	13.88
MAGEA4	3535.07	YES	YES	8.826	40.05	3.32	12.07
EPS8L3	552.133	YES	YES	9.036	34.5	2.86	12.06
DEFA5	1298.73	YES	YES	17.174	30.58	2.74	11.16
KRT6A	7334.2	YES	YES	6.477	314.76	28.4	11.08
TFF2	3271.77	YES	YES	8.71	23.33	2.21	10.55
ANXA10	927.668	YES	YES	7.145	19.58	2.41	8.13
TFF1	4129.52	YES	YES	5.171	64.49	9.72	6.64
OLFM4	6183.87	YES	YES	6.602	19.1	2.9	6.58
KRT20	1144.72	YES	YES	7.565	13.78	2.11	6.54
SYT13	1507.54	YES	YES	5.353	101.88	15.9	6.41
KLK7	571.099	YES	YES	5.951	36.9	6.05	6.1
TNS4	1513.21	YES	YES	6.614	478.57	81.11	5.9
PI3	716.254	YES	YES	6.811	74.16	12.88	5.76
UPK1B	1588.48	YES	YES	6.089	12.83	2.25	5.71
REG4	10913.5	YES	YES	6.248	9.71	1.71	5.68
S100A7	1046.5	YES	YES	7.619	8.6	1.55	5.56
GPX2	5527.08	YES	YES	4.029	511.83	94.98	5.39
SST	717.212	YES	YES	6.525	13.65	2.59	5.28
MAGEA6	782.494	YES	YES	4.503	52.18	9.92	5.26
UGT1A6	3134.99	YES	YES	4.234	139.5	26.72	5.22
IGF2BP1	608.561	YES	YES	4.915	32.41	6.29	5.15
SERPINB3	1943.77	YES	YES	4.595	67.25	13.42	5.01
DKK4	790.561	YES	YES	10.14	5.64	1.13	5
ABCC2	869.54	YES	YES	5.825	56.01	11.22	4.99
CDHR2	536.131	YES	YES	6.14	9.54	1.92	4.96
CPLX2	3245.72	YES	YES	4.692	25.43	5.2	4.89
TRIM29	2029.91	YES	YES	5.095	395.74	81.5	4.86
HOXB9	1397.94	YES	YES	4.318	54.48	11.25	4.84
FGB	24409.6	YES	YES	3.143	196.55	42.73	4.6
MAGEA3	595.506	YES	YES	4.253	45.87	10.1	4.54
HMGA2	801.137	YES	YES	4.308	78.8	17.39	4.53
MMP1	5041.21	YES	YES	5.503	1362.36	305.58	4.46
DSG3	714.938	YES	YES	5.905	8.31	1.88	4.42
KRT16	740.316	YES	YES	4.801	109.87	24.9	4.41
MMP12	1287.91	YES	YES	5.507	680.51	155.63	4.37
GAGE12D	801.141	YES	YES	7.265	67.33	15.88	4.24
FER1L6	687.577	YES	YES	5.724	9.34	2.25	4.14
FGA	37930.9	YES	YES	3.397	581.93	142.18	4.09
ANXA8	659.77	YES	YES	5.006	98.66	24.21	4.08
MUC13	3803.51	YES	YES	3.458	210.19	51.88	4.05
DKK1	932.214	YES	YES	4.474	122.34	31.11	3.93
MYEOV	1327.93	YES	YES	4.362	135.66	35.22	3.85
SPRR1B	729.902	YES	YES	4.245	35.26	9.31	3.79
VIL1	1016.71	YES	YES	3.251	88.52	23.56	3.76
SERPINA3	4182.19	YES	YES	5.374	1193.29	320.66	3.72
LYPD3	771.095	YES	YES	6.791	344.6	93.37	3.69
AKR1C2	21457.1	YES	YES	3.2	883.61	247.29	3.57
MYBPC1	1194.62	YES	YES	4.705	9.9	2.77	3.57
TCN1	2372.64	YES	YES	3.2	77.69	22.03	3.53
SLC7A11	1453.74	YES	YES	5.921	887.27	254.75	3.48
SPRR2A	739.64	YES	YES	5.543	9.54	2.8	3.41
CNTNAP2	544.495	YES	YES	4.253	53.28	15.66	3.4
PSCA	8557.23	YES	YES	3.489	70.92	20.89	3.4
PKP2	544.92	YES	YES	5.601	386.26	114.25	3.38
KRT23	735.474	YES	YES	3.859	30.32	9	3.37
MUC16	1672.1	YES	YES	3.23	497.79	149.99	3.32
PADI3	635.167	YES	YES	4.185	11.49	3.5	3.29
PAH	708.444	YES	YES	4.196	21.48	6.57	3.27
SPRR3	570.578	YES	YES	4.411	15.98	4.91	3.26
CDH17	816.572	YES	YES	3.717	46.77	14.49	3.23
CPS1	15308.5	YES	YES	3.177	175.95	54.77	3.21
PSG3	637.557	YES	YES	7.328	5.91	1.86	3.18
MMP10	1642.1	YES	YES	3.776	46.83	14.79	3.17
EGLN3	1710.6	YES	YES	5.797	1354.85	442.51	3.06
VGLL2	933.109	YES	YES	7.549	2.96	0.97	3.06
TPX2	1343.96	YES	YES	7.112	1621.59	531.16	3.05
SLC2A1	4107.97	YES	YES	7.244	4591.56	1521.19	3.02
TAC1	2101.92	YES	YES	5.901	5.55	1.83	3.02
GABRP	1473.97	YES	YES	3.453	56.81	19.03	2.99
KRT14	4407.79	YES	YES	3.713	19.64	6.62	2.97
CA9	1213.38	YES	YES	3.172	194.05	66.01	2.94
F5	1125.99	YES	YES	4.598	278.96	96.87	2.88
KLK5	690.996	YES	YES	3.968	10.95	3.81	2.87
IGF2BP3	717.606	YES	YES	4.102	326.38	114.71	2.85
MYBL2	1164.82	YES	YES	5.612	1195.04	419.1	2.85
UBE2C	871.938	YES	YES	5.712	836.41	299.79	2.79
MFI2	742.115	YES	YES	5.427	294.9	105.94	2.78
SLC16A1	1075.36	YES	YES	6.203	611.03	219.8	2.78
ANLN	996.752	YES	YES	6.494	1180.56	425.95	2.77
CXCL5	1040.37	YES	YES	3.607	173.48	62.72	2.77
PTPRH	514.521	YES	YES	3.687	217.28	78.47	2.77
WDR72	551.604	YES	YES	3.144	87.25	31.51	2.77
FOXM1	850.358	YES	YES	6.58	1121.79	407.59	2.75
COL7A1	679.942	YES	YES	4.008	224.17	82.55	2.72
KIF2C	528.43	YES	YES	6.313	614.99	225.75	2.72
CA12	2431.19	YES	YES	4.155	615.72	227.98	2.7
TRIM31	677.144	YES	YES	3.885	48.3	17.97	2.69
GJB2	1417.99	YES	YES	4.848	694.62	258.8	2.68
KRT17	8090.15	YES	YES	3.613	975.49	365.86	2.67
STRA6	656.95	YES	YES	3.793	212.95	80.75	2.64
CYP24A1	4705.19	YES	YES	2.991	470.63	178.96	2.63
LAMC2	8928.07	YES	YES	5.722	6504.71	2472.92	2.63
GREM1	2007.33	YES	YES	3.783	1031.57	396.17	2.6
S100P	10702.2	YES	YES	2.866	1565.03	602.6	2.6
PRAME	1438.85	YES	YES	2.274	90.33	35.29	2.56
KYNU	1197.66	YES	YES	4.829	465.29	182.29	2.55
RRM2	967.9	YES	YES	6.546	1398.96	547.84	2.55
CDC20	723.909	YES	YES	5.943	865.15	340.8	2.54
MLLT11	776.858	YES	YES	5.245	218.23	87.23	2.5
TMEM45A	1167.67	YES	YES	5.657	705.28	281.95	2.5
CD109	1043.51	YES	YES	5.463	815.8	330.35	2.47
LAMA3	3943.95	YES	YES	4.083	1652.85	669.61	2.47
SDCBP2	773.613	YES	YES	4.676	426.15	172.59	2.47
PCK1	901.278	YES	YES	3.521	5.92	2.41	2.46
PCSK1	7480.73	YES	YES	2.801	25.23	10.27	2.46
FOSL1	537.256	YES	YES	4.592	181.95	74.11	2.45
IGF2BP2	566.457	YES	YES	4.944	553.76	226.22	2.45
MUC6	9729.31	YES	YES	2.712	26.75	10.9	2.45
SOX9	1119.31	YES	YES	3.85	720.22	293.9	2.45
MKI67	1465.39	YES	YES	5.822	1974.42	817.38	2.42
CLGN	757.126	YES	YES	3.432	82.77	34.4	2.41
ITGA6	3152.68	YES	YES	6.288	2295.3	951.58	2.41
KLK10	945.898	YES	YES	2.932	153.77	63.91	2.41
COL11A1	2315.37	YES	YES	2.501	437.76	182.57	2.4
SLC5A8	641.424	YES	YES	2.738	38.88	16.33	2.38
EREG	1917.87	YES	YES	2.425	96.22	40.68	2.37
PRC1	553.869	YES	YES	7.104	979.55	412.66	2.37
STEAP1	627.924	YES	YES	4.577	490.8	207.15	2.37
TOP2A	2361.52	YES	YES	5.617	3175.79	1342.5	2.37
GP2	1091.74	YES	YES	3.13	8.41	3.58	2.35
RHOV	907.204	YES	YES	4.339	370.45	159.06	2.33
EYA2	697.277	YES	YES	3.358	176.72	76.22	2.32
TNNT1	690.801	YES	YES	2.472	144.44	62.59	2.31
CALML5	982.621	YES	YES	3.104	6.87	2.99	2.3
KLK14	877.968	YES	YES	2.828	8.07	3.53	2.29
S100A8	2361.93	YES	YES	4.139	394.38	172.03	2.29
SPOCK1	527.3	YES	YES	3.547	156.75	68.42	2.29
AHNAK2	3841.05	YES	YES	3.781	2288.46	1005.45	2.28
CDK1	700.039	YES	YES	5.96	905.97	398.18	2.28
ECT2	894.684	YES	YES	7.109	1518.83	668.74	2.27
PLUNC	43355.7	YES	YES	1.789	373.95	165.34	2.26
KIF1A	2102.94	YES	YES	1.918	46.57	20.7	2.25
AKR1C1	26834.2	YES	YES	2.318	1346.46	599.94	2.24
CENPF	1071.99	YES	YES	5.053	1268.16	574.1	2.21
CCNB1	677.871	YES	YES	6.195	1051.92	477.09	2.2
L1CAM	495.671	YES	YES	3.388	33.33	15.17	2.2
FGG	32169.4	YES	YES	1.808	1156.16	527.65	2.19
GCNT3	2018.43	YES	YES	3.024	517.51	237.31	2.18
CDA	583.715	YES	YES	3.292	169.08	77.74	2.17
KIFC1	536.769	YES	YES	5.336	610.95	283.4	2.16
UBD	3243.34	YES	YES	3.38	1370.62	633.91	2.16
PLOD2	3217.32	YES	YES	4.692	2635.55	1227.35	2.15
CALML3	799.143	YES	YES	2.622	6.82	3.19	2.14
KLK12	3473.87	YES	YES	2.004	24.82	11.62	2.14
RSPO3	772.453	YES	YES	3.724	74.89	34.99	2.14
PRSS1	776.437	YES	YES	2.726	9.28	4.36	2.13
IGFBP1	754.198	YES	YES	3.078	5.62	2.65	2.12
SAA1	814.329	YES	YES	2.644	108.54	51.09	2.12
PFN2	2225.12	YES	YES	4.528	2398.91	1141.94	2.1
GCLC	3125.52	YES	YES	4.024	1804	864.07	2.09
PLCD3	536.493	YES	YES	5.411	396.11	189.37	2.09
AKR1C3	9516.86	YES	YES	2.839	1690.37	812.45	2.08
CDK6	654.396	YES	YES	5.581	800.7	385.13	2.08
KIAA1199	2259.74	YES	YES	3.584	1075.14	520.3	2.07
TXNRD1	10243	YES	YES	4.697	7368.92	3560.64	2.07
ADAM12	624.382	YES	YES	3.571	486.89	236.2	2.06
C15orf48	2212.6	YES	YES	3.566	932	452.01	2.06
SMOC1	896.721	YES	YES	2.372	92.65	44.98	2.06
AURKA	640.01	YES	YES	5.218	567.46	277.64	2.04
KRT5	8549.92	YES	YES	2.184	73.81	36.19	2.04
PKIB	615.163	YES	YES	3.855	236.84	116.27	2.04
RND3	679.832	YES	YES	5.212	920.84	452.28	2.04
TRY6	504.233	YES	YES	2.822	7.39	3.62	2.04
GGH	1080.11	YES	YES	4.373	591.48	291.65	2.03
IQGAP3	631.795	YES	YES	4.518	675.6	332.63	2.03
RARRES1	2371.56	YES	YES	4.099	730.24	360.16	2.03
TSPAN8	4301.75	YES	YES	2.527	774.88	381.89	2.03
CAMK2N1	1143.01	YES	YES	4.408	846.95	418.94	2.02
IL8	1998.41	YES	YES	3.432	847.24	420.12	2.02
RACGAP1	560.955	YES	YES	6.459	978.49	484.34	2.02
HEPACAM2	730.992	YES	YES	2.386	6.69	3.33	2.01
SERPINE2	5715.48	YES	YES	4.567	696.38	346	2.01
TRIM16L	648.101	YES	YES	3.872	282.48	141.04	2
FER1L4	564.165	YES	YES	2.973	218.21	109.59	1.99
SPAG5	663.898	YES	YES	4.862	783.8	394.73	1.99
ZWINT	505.295	YES	YES	5.569	784.73	395.87	1.98
FERMT1	679.143	YES	YES	4.576	714.07	362.61	1.97
TFAP2B	528.824	YES	YES	3.129	4.65	2.37	1.97
STEAP2	738.804	YES	YES	3.889	779.41	396.82	1.96
DUSP4	1029.35	YES	YES	3.827	639.28	328.27	1.95
FZD10	525.926	YES	YES	2.794	30.68	15.74	1.95
SEMA3A	628.648	YES	YES	2.965	257.36	132.01	1.95
GPC6	603.076	YES	YES	3.686	341.75	176.01	1.94
MDFI	847.905	YES	YES	4.269	504.39	259.68	1.94
C2CD4A	582.929	YES	YES	2.962	201.92	104.78	1.93
TF	11770.3	YES	YES	2.066	52.21	27	1.93
EIF3C	635.32	YES	YES	4.341	358.02	186.55	1.92
QPCT	1846.11	YES	YES	2.82	655.75	340.74	1.92
CDCP1	1338.12	YES	YES	4.403	1899.26	993.02	1.91
ERO1L	2755.8	YES	YES	5.395	3274.94	1712.29	1.91
HGD	906.765	YES	YES	1.918	104.6	54.72	1.91
LGALS4	4447.54	YES	YES	1.662	49.39	25.86	1.91
RHPN2	777.123	YES	YES	5.152	970.52	507.01	1.91
SLC26A4	716.132	YES	YES	2.512	35.53	18.59	1.91
APOL1	5789.84	YES	YES	4.751	4185.47	2203.47	1.9
C12orf75	763.515	YES	YES	3.662	312.59	164.95	1.9
NLRP2	917.388	YES	YES	2.117	223.35	117.7	1.9
AKAP12	3618.11	YES	YES	4.068	820.67	434.2	1.89
ASAP2	655.517	YES	YES	4.841	889.5	471.15	1.89
KCNMB4	527.08	YES	YES	3.316	197.02	104.35	1.89
B3GNT5	716.585	YES	YES	5.759	1306.22	693.32	1.88
B3GNT3	1089.53	YES	YES	3.382	907.65	484.55	1.87
DNER	699.397	YES	YES	2.402	47.48	25.35	1.87
PMAIP1	583.211	YES	YES	3.895	472.25	252.57	1.87
IDO1	1869.97	YES	YES	3.034	723.63	388.25	1.86
PCDH7	753.522	YES	YES	3.277	446.31	239.83	1.86
DSC3	976.902	YES	YES	2.273	19.42	10.5	1.85
GALNT14	520.429	YES	YES	2.555	273.94	147.77	1.85
UCHL1	2733.78	YES	YES	2.286	554.12	299.8	1.85
COL17A1	3074.47	YES	YES	1.854	343.06	187.84	1.83
FHL2	1175.45	YES	YES	3.751	1379.75	752.26	1.83
PKP1	2232.79	YES	YES	1.818	160.18	87.76	1.83
SCG3	606.885	YES	YES	2.315	7.04	3.85	1.83
PHGDH	927.532	YES	YES	3.179	596.32	327.02	1.82
LY6D	617.393	YES	YES	1.822	22.78	12.59	1.81
SERPINE1	2480.15	YES	YES	3.617	2106.25	1162.67	1.81
BACE2	1798.59	YES	YES	3.896	1896.43	1050.81	1.8
CABYR	728.974	YES	YES	2.361	137.9	77	1.79
DSC2	920.263	YES	YES	4.307	1186.59	662.59	1.79
HOXB6	501.231	YES	YES	3.001	152.88	85.19	1.79
PFKP	2614.41	YES	YES	4.335	3397.86	1904.44	1.78
SULF1	3774.1	YES	YES	3.239	3264.23	1829.08	1.78
CXCL10	1198.88	YES	YES	2.842	642.35	363.08	1.77
NCAPD2	1058.58	YES	YES	5.925	2189.9	1239.69	1.77
S100A9	9697.94	YES	YES	2.569	2709.91	1528.65	1.77
STC1	729.948	YES	YES	3.444	499.78	282.82	1.77
PI15	1734.46	YES	YES	2.842	104.34	59.22	1.76
SLC39A14	866.598	YES	YES	5.195	1376.3	781.8	1.76
CCL20	1600.28	YES	YES	2.284	331.41	188.84	1.75
FRMD6	615.725	YES	YES	3.898	629.84	359.8	1.75
FXYD3	2458.54	YES	YES	2.734	1654.54	946.02	1.75
IL1RN	534.687	YES	YES	3.31	410.56	233.96	1.75
PERP	4976.05	YES	YES	5.296	7577.14	4329.69	1.75
MTHFD2	1205.52	YES	YES	4.936	2000.33	1149.61	1.74
SAMD9	659.775	YES	YES	4.078	759.48	436.9	1.74
TACC3	814.928	YES	YES	4.937	1173.36	675.82	1.74
DSG2	3611.54	YES	YES	4.153	4805.8	2781.2	1.73
EIF4EBP1	2029.62	YES	YES	3.83	997.49	577.22	1.73
GNLY	4636.73	YES	YES	2.641	173.89	100.49	1.73
NTS	11847.4	YES	YES	1.82	10.93	6.33	1.73
TINAGL1	1080.82	YES	YES	4.014	1050.87	606.25	1.73
KLF4	613.876	YES	YES	3.453	669.56	390.28	1.72
GALNT4	882.443	YES	YES	4.399	984.95	575.05	1.71
GBP1	1807.42	YES	YES	3.565	1846.45	1076.8	1.71
LMNB1	763.607	YES	YES	4.617	1160.42	679.81	1.71
MCM4	1049.8	YES	YES	4.539	1627.89	950.85	1.71
SULF2	1034.69	YES	YES	4.031	1247.93	731.41	1.71
TRIM16	1093.35	YES	YES	4.096	1012.99	591.03	1.71
HK2	1504	YES	YES	3.955	1899.37	1117.77	1.7
HMGA1	3753.69	YES	YES	4.517	4874.89	2859.71	1.7
JAG1	1284.45	YES	YES	4.161	1241.75	736.85	1.69
KPNA2	1604.43	YES	YES	4.533	2757.84	1632.83	1.69
STMN1	3088.54	YES	YES	4.305	3750.25	2223.37	1.69
TYMS	599.391	YES	YES	4.205	751.01	443.39	1.69
CDH3	3328.25	YES	YES	2.383	2005.82	1195.55	1.68
FAM83A	2818.99	YES	YES	2.165	1248.65	743.46	1.68
FSCN1	2430.75	YES	YES	3.463	2155.89	1280.66	1.68
OAS1	1553.42	YES	YES	3.604	1680.28	1001.28	1.68
TGFA	1131.11	YES	YES	2.866	828.78	495.43	1.67
LAMB3	7879.99	YES	YES	3.038	7931.05	4782.56	1.66
LOXL2	1115.28	YES	YES	3.197	1006.79	607.33	1.66
MAPK6	601.815	YES	YES	6.519	1556.73	935	1.66
MMP14	5000.5	YES	YES	4.184	7600.23	4580.83	1.66
SLC38A1	1633.57	YES	YES	3.901	2733.73	1645.11	1.66
SNCG	1196.63	YES	YES	2.217	237.19	142.84	1.66
B4GALT4	561.996	YES	YES	5.502	893.31	543.03	1.65
LIN28A	497.868	YES	YES	2.769	2.21	1.34	1.65
MCM2	1062.25	YES	YES	4.126	1329.57	803.84	1.65
POSTN	5094.68	YES	YES	3.063	4939.88	2991.96	1.65
LAMA1	721.203	YES	YES	2.281	43.61	26.61	1.64
NAMPT	5200.32	YES	YES	3.775	5179.82	3165.55	1.64
SRXN1	4271.88	YES	YES	3.16	2091.23	1272.28	1.64
SLC2A10	580.586	YES	YES	3.169	630.32	386.2	1.63
SLC6A8	1063.07	YES	YES	3.02	833.22	511.96	1.63
TFRC	2997.26	YES	YES	4.069	3595.61	2206.18	1.63
CYP3A5	537.691	YES	YES	1.779	29.83	18.47	1.62
F2	530.015	YES	YES	2.28	3.02	1.86	1.62
S100A2	3177.77	YES	YES	2.002	343.53	211.56	1.62
FBXO32	762.555	YES	YES	3.309	575.32	357.06	1.61
FLNC	735.092	YES	YES	2.536	276.57	171.76	1.61
GAPDH	29538.4	YES	YES	4.784	63202.2	39345.8	1.61
KCTD3	545.462	YES	YES	4.558	1148.28	711.5	1.61
MICAL3	500.111	YES	YES	3.725	678.81	421.97	1.61
NQO1	10686.1	YES	YES	2.318	4490.76	2789.55	1.61
ATAD2	804.512	YES	YES	3.92	1128.86	707.39	1.6
DST	2782.78	YES	YES	3.229	2552.86	1594.52	1.6
FABP7	2468.89	YES	YES	2.093	3.5	2.19	1.6
ANO1	1799.34	YES	YES	2.769	560.6	352.17	1.59
TK1	945.424	YES	YES	3.342	1267.61	795.1	1.59
CTHRC1	1414.74	YES	YES	2.715	1420.18	897.93	1.58
FA2H	874.846	YES	YES	2.686	426.62	270.57	1.58
LBP	1970.57	YES	YES	1.69	4.14	2.63	1.58
COL12A1	4251.99	YES	YES	2.251	1830.13	1164.93	1.57
DSP	7358.02	YES	YES	2.452	6707.58	4275.25	1.57
PLAU	4930.11	YES	YES	2.429	2771.74	1761.55	1.57
TMPO	1019	YES	YES	5.089	2158.83	1370.99	1.57
UGT2B4	600.11	YES	YES	1.756	7.57	4.82	1.57
ACTN1	2717.91	YES	YES	4.721	4920.47	3164.1	1.56
CDCA7	548.723	YES	YES	2.674	469.47	300.42	1.56
ITGA5	2229.04	YES	YES	3.905	2339.28	1495.49	1.56
PLBD1	867.71	YES	YES	3.069	924.47	592.43	1.56
TIMELESS	655.39	YES	YES	4.333	1111.34	713.19	1.56
TNFRSF6B	657.897	YES	YES	2.376	138.49	88.87	1.56
TSPAN1	4002.59	YES	YES	1.981	1732.21	1109.29	1.56
ATP13A3	1502.54	YES	YES	4.873	3032.78	1958.67	1.55
EPT1	804.658	YES	YES	4.934	1429.64	923.61	1.55
MIAT	1184.77	YES	YES	2.29	366.63	236.5	1.55
TUBA1C	3347.28	YES	YES	4.914	7123.36	4603.79	1.55
CKS1B	842.478	YES	YES	3.889	1009.64	654.85	1.54
CXCL1	949.716	YES	YES	2.059	336.89	219.46	1.54
ITGB4	4874.46	YES	YES	2.41	4138.91	2688.18	1.54
MT2A	2537.92	YES	YES	2.783	2078.65	1349.98	1.54
MXRA5	2865.51	YES	YES	2.646	2572.61	1672.58	1.54
SCARB1	1034.4	YES	YES	3.605	991	641.55	1.54
SCN3A	665.686	YES	YES	1.671	20.09	13.08	1.54
ANXA2P2	4311.26	YES	YES	4.143	7373.39	4806.35	1.53
BASP1	1491.87	YES	YES	2.832	1403.36	919.72	1.53
DHRS9	635.959	YES	YES	1.941	149.85	98.16	1.53
G6PD	4940.25	YES	YES	2.856	3017.16	1973.98	1.53
GBP5	1019.47	YES	YES	2.329	634.66	415.98	1.53
MT1X	750.451	YES	YES	2.797	463.11	303.32	1.53
TUBA1B	8365.07	YES	YES	5.302	21859.4	14328	1.53
CLMN	579.151	YES	YES	2.847	640.59	421.24	1.52
LOX	767.24	YES	YES	2.955	689.08	454.03	1.52
MCM6	670.879	YES	YES	4.15	1365.49	896.53	1.52
S100A16	3104	YES	YES	3.161	4364.92	2879.16	1.52
ANXA2	11619.8	YES	YES	4.042	20581.8	13621.3	1.51
ANXA3	1185.38	YES	YES	2.845	1130.47	750.62	1.51
ATP2B1	632.664	YES	YES	4.482	1207.98	800.33	1.51
H2AFZ	1960.36	YES	YES	4.622	4120.21	2736.48	1.51
PLAUR	1535.81	YES	YES	3.095	1841.77	1221.86	1.51
SLC7A1	713.126	YES	YES	3.966	1227.75	812.42	1.51
VANGL2	624.87	YES	YES	2.124	443.09	293.25	1.51
ZNF703	623.719	YES	YES	2.353	137.35	90.88	1.51
GCLM	850.175	YES	YES	3.15	688.43	459.47	1.5
LAMB1	2060.79	YES	YES	3.523	3355.23	2237.3	1.5
MAP4K4	1832.41	YES	YES	4.514	3292.49	2194.75	1.5
MYO1E	908.271	YES	YES	3.956	1471.86	978.19	1.5
NFE2L3	941.511	YES	YES	2.981	1087.17	726.89	1.5
RAN	2779.8	YES	YES	4.66	5679.61	3795.71	1.5
RBP1	565.293	YES	YES	2.979	303.04	201.47	1.5
TUBB3	2101.77	YES	YES	2.195	1711.98	1144.41	1.5
PTGR1	2447.77	YES	YES	2.811	1001.08	673.82	1.49
SFRP1	624.959	YES	YES	1.653	58.63	39.23	1.49
SLC7A5	2447.62	YES	YES	2.784	2212.61	1480.97	1.49
XDH	726.816	YES	YES	1.709	244.7	164.13	1.49
EFNB2	786.765	YES	YES	3.152	1093.92	738.51	1.48
PSG4	1245.25	YES	YES	2.216	3.69	2.49	1.48
STAT1	5954.01	YES	YES	3.368	8916.61	6019.77	1.48
CKS2	508.831	YES	YES	3.107	585.85	397.88	1.47
DNAJC10	1652.65	YES	YES	4.545	3607.75	2448.43	1.47
LRP4	1013.17	YES	YES	1.955	213.57	145.14	1.47
PCNA	1269.62	YES	YES	4.132	2373.2	1618.15	1.47
SEMA3C	1043.85	YES	YES	2.777	1223.56	830.67	1.47
SFRP2	3089.4	YES	YES	1.652	1784.46	1215.37	1.47
SOD2	5666.63	YES	YES	3.515	7626.55	5185.15	1.47
STK38L	631.858	YES	YES	4.141	1051.07	716.74	1.47
TAP1	3881.46	YES	YES	3.037	4682.3	3176.36	1.47
TBC1D1	562.257	YES	YES	3.821	972.5	659.4	1.47
TOPBP1	550.805	YES	YES	4.113	1028.85	702.1	1.47
ATP1B3	1052.13	YES	YES	4.374	2159.74	1482.63	1.46
CXCR7	658.441	YES	YES	2.598	443	302.45	1.46
GNPNAT1	613.962	YES	YES	3.999	1335.67	915.15	1.46
HMGB2	1273.45	YES	YES	3.713	2092.23	1432.23	1.46
VCAN	5307.28	YES	YES	2.237	4385.46	3007.59	1.46
LPCAT4	916.82	YES	YES	3.664	699.83	484.14	1.45
MCM7	1689.37	YES	YES	3.722	2720.03	1875.11	1.45
PDLIM5	1663.54	YES	YES	3.777	2217.35	1531.5	1.45
ROBO1	553.949	YES	YES	2.989	754.32	519.74	1.45
TRNP1	1049.12	YES	YES	1.882	379.08	261.99	1.45
VILL	1602.26	YES	YES	1.971	256.01	176.54	1.45
CSE1L	1025.09	YES	YES	4.263	2361.74	1644.3	1.44
EFHD2	1776.75	YES	YES	3.532	2779.12	1923.91	1.44
MARCKS	1643.18	YES	YES	3.608	3776.93	2629.14	1.44
OAS3	2103.55	YES	YES	2.828	2700.1	1874.3	1.44
PAX8	1198.35	YES	YES	1.947	71.92	49.85	1.44
TPM4	4886.57	YES	YES	4.254	11923	8251.26	1.44
TSKU	2742.61	YES	YES	2.68	1426.51	991.78	1.44
AFP	4006.84	YES	YES	1.904	2.57	1.8	1.43
CKAP4	1427.31	YES	YES	4.239	3626.2	2528.03	1.43
FKBP4	1429.97	YES	YES	3.474	2641.28	1850.29	1.43
GNB4	600.363	YES	YES	3.269	1084.66	760.29	1.43
GPI	4202.62	YES	YES	4.098	8140.52	5702.98	1.43
GSR	1393.54	YES	YES	2.923	1467.7	1026.43	1.43
ITGB1	7400.23	YES	YES	4.397	15678.4	10972.4	1.43
KPNA4	658.592	YES	YES	5.181	2062.22	1437.94	1.43
NMD3	505.4	YES	YES	4.49	1279.13	894.39	1.43
PHLDA1	1931.33	YES	YES	2.47	1978.41	1385.88	1.43
ACTL6A	743.647	YES	YES	4.091	1449.68	1024.21	1.42
ASAP1	569.408	YES	YES	3.592	1191.83	837.9	1.42
CCT5	3730.94	YES	YES	3.774	7011.02	4941.64	1.42
ERMP1	810.814	YES	YES	3.478	1108.63	783.36	1.42
HIF1A	3113.58	YES	YES	3.674	5385.86	3783.51	1.42
HOXB3	624.507	YES	YES	1.965	250.42	175.81	1.42
OPA1	554.091	YES	YES	4.952	1646.25	1159.17	1.42
PHLDB2	561.621	YES	YES	2.479	490.13	345.12	1.42
PLSCR1	1025.65	YES	YES	3.357	1753.53	1237.24	1.42
ANKRD22	639.336	YES	YES	1.782	470.56	334.68	1.41
C6orf115	558.935	YES	YES	3.28	896.15	637.71	1.41
C7orf68	987.138	YES	YES	2.454	423.41	300.07	1.41
FAM162A	584.82	YES	YES	3.68	970.04	685.86	1.41
FKBP10	2309.43	YES	YES	2.251	2312.18	1639.33	1.41
FUCA2	732.645	YES	YES	4.254	1971.26	1400.29	1.41
PAICS	1733.29	YES	YES	3.72	3055.85	2170.01	1.41
PSAT1	729.286	YES	YES	1.987	494.26	351.26	1.41
SLC38A2	1958.49	YES	YES	3.947	4639.51	3296.53	1.41
ACTR3	2083.9	YES	YES	4.971	6525.37	4655.26	1.4
C20orf24	1415.44	YES	YES	3.51	2782.22	1987.43	1.4
FAP	539.247	YES	YES	2.026	509.64	365.11	1.4
FAT1	3887.93	YES	YES	2.392	3151.86	2254.04	1.4
LDHA	9430.8	YES	YES	3.638	20245.3	14478.9	1.4
LMNB2	1010.71	YES	YES	3.238	1754.4	1250.9	1.4
NCEH1	815.803	YES	YES	2.976	1151.09	824.35	1.4
SEMA4B	2913.59	YES	YES	3.122	4190.88	2983.95	1.4
STRAP	958.672	YES	YES	4.258	2483.37	1773.97	1.4
TTC9	1136.52	YES	YES	2.503	927.92	663.73	1.4
TTLL12	676.437	YES	YES	3.621	1333.7	952.8	1.4
UBE2E3	507.244	YES	YES	4.272	1227.97	874.15	1.4
WSB2	793.637	YES	YES	4.465	2139	1523.03	1.4
CBX2	530.138	YES	YES	1.854	266.18	191.47	1.39
CORO1C	1219.23	YES	YES	3.961	3255.15	2348.88	1.39
DYRK2	1029.73	YES	YES	3.326	792.88	571.63	1.39
GBP4	1423.13	YES	YES	2.204	1194.94	856.83	1.39
GMPS	659.769	YES	YES	3.764	1324.92	956.49	1.39
GULP1	710.158	YES	YES	2.255	604.52	434.33	1.39
IGFBP5	10546.1	YES	YES	2.113	7291.11	5246.34	1.39
PNP	798.302	YES	YES	3.393	1464.38	1050.68	1.39
TPI1	5048.21	YES	YES	3.843	11959.1	8611.97	1.39
TWF1	1204.41	YES	YES	3.888	2546.71	1832.33	1.39
UTP20	545.666	YES	YES	3.266	825.31	593.08	1.39
VOPP1	2229.58	YES	YES	3.561	1742.22	1249.15	1.39
ADAM28	604.007	YES	YES	2.016	447.1	324.79	1.38
APOL2	702.071	YES	YES	3.187	1209.88	875.94	1.38
BZW1	2466.54	YES	YES	4.102	6022.41	4358.86	1.38
C19orf21	1272.73	YES	YES	2.206	1301.86	940.52	1.38
CCL21	929.102	YES	YES	1.926	763.55	555.01	1.38
DIP2B	528.59	YES	YES	3.966	1373.68	998.36	1.38
GBP2	1776.13	YES	YES	2.551	2266.1	1648.01	1.38
MEST	1163.32	YES	YES	3.1	1706.9	1232.64	1.38
UBA2	1724.01	YES	YES	3.922	2762.39	2003.65	1.38
WARS	6771.08	YES	YES	2.494	6446.43	4685.4	1.38
ADAM10	721.187	YES	YES	3.711	1861.97	1355.02	1.37
ARHGAP21	791.295	YES	YES	3.678	1829.9	1334.7	1.37
COL5A2	3761.59	YES	YES	1.996	3331.88	2436.97	1.37
CTSL1	2474.37	YES	YES	2.882	3480.66	2544.91	1.37
EPHB2	929.162	YES	YES	1.93	672.56	490.58	1.37
FAM60A	1817.49	YES	YES	3.098	2125.05	1546.39	1.37
HEPH	503.407	YES	YES	2.4	374.84	272.9	1.37
HOXB2	703.801	YES	YES	1.648	158.6	115.5	1.37
MARCKSL1	2865.23	YES	YES	2.774	4731.34	3456.57	1.37
MYC	1329.81	YES	YES	2.226	1399.58	1024.4	1.37
NAA50	1052.71	YES	YES	4.422	3058.58	2225.96	1.37
NRAS	756.232	YES	YES	3.977	1961.78	1435.32	1.37
PAK2	897.988	YES	YES	4.63	2963.18	2156.09	1.37
PGK1	9087.75	YES	YES	3.163	14629.5	10669.9	1.37
PLEKHG3	519.238	YES	YES	2.47	665.53	486.49	1.37
PPIF	676.277	YES	YES	3.95	1484.71	1080.25	1.37
PPM1H	725.966	YES	YES	2.029	568.29	414.99	1.37
PTGFRN	1221.38	YES	YES	3.102	2141.22	1557.98	1.37
RANBP1	759.146	YES	YES	3.626	1197.7	874.96	1.37
SLC20A1	946.571	YES	YES	3.316	1783.04	1302.25	1.37
SMS	815.037	YES	YES	3.76	1828.09	1332.71	1.37
ST3GAL4	613.524	YES	YES	2.99	729.35	534	1.37
TUBB	8734.46	YES	YES	3.74	19765.7	14382	1.37
ZAK	616.2	YES	YES	3.298	1270.39	927.56	1.37
ADIPOR2	639.065	YES	YES	4.382	1942.73	1425.84	1.36
ATP11B	666.1	YES	YES	4.001	1547.14	1134.23	1.36
CEBPG	831.792	YES	YES	3.575	1168.01	859.97	1.36
CTAGE5	658.046	YES	YES	3.158	1304.45	959.16	1.36
EFNB1	645.56	YES	YES	2.495	646.04	473.32	1.36
LIMK2	782.664	YES	YES	3.47	1405.03	1029.47	1.36
MYO5B	809.822	YES	YES	2.95	1344.96	986.32	1.36
PKM2	11690.2	YES	YES	4.019	32315.3	23697.6	1.36
PSMB9	1167.16	YES	YES	2.148	1107.99	812.67	1.36
PSMD14	734.622	YES	YES	3.935	1829.35	1341.46	1.36
SH3BP4	1101.74	YES	YES	3.006	1911.44	1403.81	1.36
TGFBI	8932.47	YES	YES	2.029	4809.12	3542.33	1.36
TPBG	517.834	YES	YES	2.553	847.53	625.3	1.36
TUSC3	833.547	YES	YES	1.881	688.61	505.11	1.36
AGFG1	754.285	YES	YES	4.408	2135.15	1580.48	1.35
ATF5	731.443	YES	YES	3.051	1222.96	905.96	1.35
CPD	6110.44	YES	YES	2.359	6563.29	4852.3	1.35
DDX60	832.556	YES	YES	2.189	911.48	676.24	1.35
DOCK5	561.673	YES	YES	1.99	516.89	384.08	1.35
DUSP5	824.245	YES	YES	2.251	880.13	650.12	1.35
GLT25D1	1131.22	YES	YES	3.536	2948.97	2191.13	1.35
KRT19	15044.3	YES	YES	2.068	15061.5	11175.5	1.35
NUP155	498.06	YES	YES	2.864	748.41	554.42	1.35
PGD	4879.54	YES	YES	2.494	4888.68	3634.52	1.35
PLIN2	1831.24	YES	YES	2.287	1658.07	1230.45	1.35
ADAM9	4016.82	YES	YES	2.771	5292.09	3937.96	1.34
ARL6IP1	2514.49	YES	YES	3.799	6842.6	5102.65	1.34
C19orf48	567.856	YES	YES	2.838	958.18	713.83	1.34
DNAJB11	747.301	YES	YES	3.799	1953.94	1457.61	1.34
HTATIP2	880.231	YES	YES	2.986	1531.4	1141.92	1.34
IGF1R	1029.34	YES	YES	2.376	1598.92	1195.42	1.34
NDUFA9	550.816	YES	YES	3.707	1333.94	992.49	1.34
PRSS23	3215.72	YES	YES	2.283	3063.45	2284.57	1.34
PSMD11	677.904	YES	YES	3.663	1741.52	1302.4	1.34
PSMD2	1975.38	YES	YES	4.015	5470.52	4073.6	1.34
PVR	689.659	YES	YES	3.428	1482.8	1103.16	1.34
PXN	1492.92	YES	YES	3.601	3450.41	2576.89	1.34
TMEM132A	1069.23	YES	YES	2.039	1141.12	852.29	1.34
VASP	1228.15	YES	YES	3.659	2952.26	2205.97	1.34
VDAC1	1568.62	YES	YES	3.871	4199.74	3141.11	1.34
ABCC1	1391.99	YES	YES	2.913	2063.4	1553.38	1.33
CMAS	513.116	YES	YES	3.252	905.75	682.88	1.33
DYNLL1	1156.7	YES	YES	4.014	3551.4	2660.48	1.33
FYB	772.489	YES	YES	1.93	697.99	525.76	1.33
HSPD1	3839.31	YES	YES	3.573	8021.85	6011.32	1.33
MANSC1	577.462	YES	YES	2.56	797.07	598.45	1.33
OAS2	1442.1	YES	YES	2.013	1573.46	1182.73	1.33
OSBPL3	505.365	YES	YES	2.586	923.47	696.46	1.33
PGAM1	1634.32	YES	YES	3.757	4267.05	3205.6	1.33
POLE	502.593	YES	YES	2.773	892.57	670.6	1.33
PSMD1	803.607	YES	YES	4.271	2577.77	1940.14	1.33
RHOF	1164.42	YES	YES	1.863	866.98	652.03	1.33
TAP2	1565.89	YES	YES	2.549	2370.78	1787.65	1.33
TARS	1291.07	YES	YES	3.114	2439.02	1828.84	1.33
TCP1	1218.88	YES	YES	3.943	3465.99	2602.55	1.33
TGM2	8934.55	YES	YES	2.243	10432.4	7830.44	1.33
WHSC1	1056.01	YES	YES	3.052	1982.51	1491.56	1.33
AKR1B1	2277.26	YES	YES	1.974	1695.03	1283.47	1.32
ATP2C1	1190.28	YES	YES	3.428	3070.36	2325.84	1.32
CCT6A	6251.02	YES	YES	3.208	4985.21	3776.85	1.32
GMFB	694.57	YES	YES	3.398	1701.2	1291.22	1.32
HDAC2	922.073	YES	YES	3.61	2261.35	1711.17	1.32
KLF5	1909.22	YES	YES	2.387	2659.83	2016.47	1.32
LASS6	585.456	YES	YES	2.693	1070.78	811.66	1.32
RAB10	1402.68	YES	YES	4.171	4275.63	3243.75	1.32
RIOK3	1006.97	YES	YES	3.506	2126.16	1605.95	1.32
RRM1	615.905	YES	YES	3.574	1542.75	1168.03	1.32
SLC44A1	1076.61	YES	YES	3.491	2811.89	2130.89	1.32
TMEM106C	1253.83	YES	YES	2.742	1748.47	1321.81	1.32
TOMM40	645.447	YES	YES	3.283	1342.97	1014.18	1.32
TPM1	2346.1	YES	YES	2.651	3679.75	2794.08	1.32
VDAC2	536.516	YES	YES	3.735	1542.94	1171.31	1.32
BMP1	604.949	YES	YES	2.351	870.81	664.45	1.31
BUB3	625.405	YES	YES	4.082	2083.24	1585.44	1.31
CCT2	9590.4	YES	YES	2.527	3365.99	2573.24	1.31
CYCS	1433.32	YES	YES	3.113	3135.99	2385.03	1.31
DDX21	918.088	YES	YES	2.706	1974.32	1509.87	1.31
FBLIM1	772.924	YES	YES	2.765	1459.97	1111.09	1.31
GPR56	2445.83	YES	YES	2.128	3985.48	3033.26	1.31
IFI16	2400.67	YES	YES	1.953	2785.6	2134.5	1.31
LUZP6	1332.24	YES	YES	3.873	4304.41	3284.02	1.31
MCM5	790.178	YES	YES	2.932	1325.45	1008.24	1.31
NUP107	1245.5	YES	YES	2.946	970.13	738.36	1.31
PDLIM7	640.199	YES	YES	2.612	1124.61	858.07	1.31
SAMD9L	809.013	YES	YES	1.913	899.63	686.89	1.31
VDAC3	1480.41	YES	YES	2.949	2137.14	1632.21	1.31
AIM1	957.557	YES	YES	1.822	1154.51	890.3	1.3
ASNS	664.724	YES	YES	2.337	769.92	592.98	1.3
DDX39	498.798	YES	YES	2.942	1134.4	874.12	1.3
DSE	555.42	YES	YES	2.386	796.1	611.53	1.3
FAM108C1	1293.79	YES	YES	1.94	1205.4	925.35	1.3
GALNT3	1167.47	YES	YES	1.81	1349.18	1035.18	1.3
IRF1	1266.98	YES	YES	2.271	1870.42	1439.11	1.3
OLA1	682.963	YES	YES	3.52	1876.56	1444.01	1.3
OPTN	883.116	YES	YES	2.882	1842.53	1415.31	1.3
PMEPA1	3520.17	YES	YES	1.947	2458.66	1884.04	1.3
POMP	691.079	YES	YES	3.497	1875.99	1438.05	1.3
RALA	627.095	YES	YES	3.685	1801.87	1384.64	1.3
RASD2	533.6	YES	YES	1.723	78.56	60.64	1.3
SAE1	668.915	YES	YES	3.962	2161.85	1658.57	1.3
SMAD3	1091.5	YES	YES	2.758	1662.95	1277.31	1.3
TNFAIP2	3243.35	YES	YES	1.737	2478.54	1900.29	1.3
TNFAIP3	959.891	YES	YES	2.097	1240.02	953.92	1.3
TNFRSF21	2825.65	YES	YES	2.275	4547.03	3497.84	1.3
TUBA4A	1335.26	YES	YES	2.292	2062.16	1588.4	1.3
XPOT	1284.38	YES	YES	2.813	2103.1	1617.76	1.3
YBX1	3787.97	YES	YES	3.41	8329.49	6414.73	1.3
YEATS2	650.335	YES	YES	2.881	1169.8	899	1.3
ACSL3	1124.31	YES	YES	3.036	2501.04	1941.65	1.29
ANKLE2	701.708	YES	YES	3.367	1886.52	1458.81	1.29
ARL4C	1415.57	YES	YES	2.324	2128.5	1649.97	1.29
CALU	3251.54	YES	YES	2.679	6127.54	4756.02	1.29
CHPT1	624.629	YES	YES	2.136	762.85	590.54	1.29
HDAC1	983.066	YES	YES	3.748	3215.6	2487.28	1.29
HSP90AA1	10040.1	YES	YES	3.135	25466.1	19718.1	1.29
IFRD1	589.903	YES	YES	2.347	811.1	628.15	1.29
IL2RB	507.658	YES	YES	1.774	519.03	400.95	1.29
KIAA0090	639.558	YES	YES	3.291	1692.12	1308.82	1.29
KIAA1949	1065.18	YES	YES	2.346	1872.3	1450.72	1.29
KIF3B	595.897	YES	YES	3.213	1744.32	1354.71	1.29
KRT8	15702.4	YES	YES	2.346	23646.3	18272	1.29
MAPRE1	1064.67	YES	YES	3.918	3631.27	2814.32	1.29
ME1	803.775	YES	YES	1.688	621.21	481.74	1.29
MRPS35	1196.78	YES	YES	2.881	1595.06	1237.78	1.29
NUP205	671.703	YES	YES	3.126	1546.32	1197.69	1.29
OPN3	1539.43	YES	YES	1.772	983.22	764.56	1.29
PDCD5	796.381	YES	YES	2.71	975.27	755.32	1.29
PSMC4	1267.58	YES	YES	3.347	2249.34	1739.5	1.29
PYGL	964.549	YES	YES	2.015	1234.96	954.4	1.29
RALB	1018.69	YES	YES	3.17	1852.87	1433.01	1.29
SFN	2852.14	YES	YES	1.806	3317.57	2576.33	1.29
SLC16A3	2977.43	YES	YES	1.944	3556.24	2759.17	1.29
SNX6	1115.62	YES	YES	2.951	1916.5	1481	1.29
SPATS2L	1501.62	YES	YES	2.499	2985.19	2322.76	1.29
THOC4	658.69	YES	YES	2.791	1317.44	1022.43	1.29
TMEM176A	1763.27	YES	YES	1.673	1344.19	1040.69	1.29
WBP5	517.87	YES	YES	2.491	1132.99	878.36	1.29
AP2M1	2107.5	YES	YES	3.633	6572.07	5118.42	1.28
GADD45A	655.02	YES	YES	1.855	760.16	594.97	1.28
GPN1	585.979	YES	YES	3.261	1186.24	924.55	1.28
NDFIP2	538.999	YES	YES	2.832	1048.62	816.4	1.28
NOP56	932.772	YES	YES	3.002	2121.22	1659.08	1.28
PRKACB	742.331	YES	YES	2.11	954.3	747.98	1.28
UGDH	3909.3	YES	YES	1.718	2520.92	1967.36	1.28
YWHAG	1921.43	YES	YES	3.152	5439.45	4263.91	1.28
YWHAZ	9093.4	YES	YES	3.155	24704	19367.3	1.28
ABCE1	579.026	YES	YES	3.406	1720.55	1350.51	1.27
ADD3	1280.64	YES	YES	1.796	1601.76	1258.43	1.27
AFAP1	647.706	YES	YES	2.609	1192.51	939.02	1.27
AP2S1	554.476	YES	YES	3.231	1512.32	1191.01	1.27
ARHGAP32	582.436	YES	YES	2.241	1133.47	889.54	1.27
ATP5B	3492.76	YES	YES	3.373	11030.3	8694.51	1.27
CD99	1492.73	YES	YES	2.255	2522.87	1987.82	1.27
CHD7	516.569	YES	YES	2.038	691.04	545.7	1.27
CLIC4	1857.94	YES	YES	2.749	4371.76	3441.69	1.27
DNM1L	677.011	YES	YES	3.133	1403.83	1106.87	1.27
EIF2S1	605.002	YES	YES	3.22	1714.1	1353.21	1.27
ENO2	1277.69	YES	YES	1.759	1413.06	1115.42	1.27
GLRX3	638.761	YES	YES	2.988	1275.36	1000.72	1.27
GPD2	568.551	YES	YES	3.26	1688.57	1330.03	1.27
GSTO1	1533.25	YES	YES	2.376	1753.15	1380.5	1.27
HSPH1	1151.64	YES	YES	2.627	2433	1923.05	1.27
INF2	1738.97	YES	YES	2.215	2513.24	1985.43	1.27
LMO4	768.589	YES	YES	2.134	1136.13	896.08	1.27
MARS	1133.06	YES	YES	3.109	2619.09	2058.96	1.27
MRPL15	611.601	YES	YES	2.701	1183.96	932.13	1.27
NLRC5	758.155	YES	YES	1.826	934.51	737.53	1.27
PSME2	1455.49	YES	YES	2.562	2914.77	2303.9	1.27
PVRL1	1282.43	YES	YES	1.788	1061.99	834.12	1.27
SCOC	1162.14	YES	YES	2.659	2062.52	1627.45	1.27
SEC23A	1044.54	YES	YES	2.501	1557.95	1223.59	1.27
SEC61G	1114.77	YES	YES	2.672	1502.4	1185.29	1.27
SFRS9	843.734	YES	YES	3.551	2815.96	2212.26	1.27
SHMT2	1445.98	YES	YES	2.53	2255.22	1773.91	1.27
SNRPG	779.9	YES	YES	2.522	1022.54	805.19	1.27
SQRDL	1136.46	YES	YES	2.267	2226.04	1758.64	1.27
STK24	1243.62	YES	YES	3.236	3446.9	2707.83	1.27
ARPC2	1713.97	YES	YES	3.489	5999.57	4779.53	1.26
CAND1	3468.61	YES	YES	2.674	2891.92	2300.31	1.26
FAR1	721.044	YES	YES	2.885	1389.36	1104.79	1.26
FBL	1178.92	YES	YES	2.843	2470.67	1966.57	1.26
GTPBP4	611.489	YES	YES	2.637	1334.34	1063.2	1.26
HMGCS1	1048.82	YES	YES	2.201	1518.13	1203.53	1.26
HSPE1	1063.81	YES	YES	2.659	2168.56	1725.75	1.26
ITGAV	2801.35	YES	YES	2.167	4369.29	3466.49	1.26
LIMA1	1199.53	YES	YES	2.627	2248.12	1779.23	1.26
MRPL51	628.545	YES	YES	3.018	1699.07	1345.99	1.26
NARS	1105.49	YES	YES	3.198	3233.36	2572.63	1.26
NBN	496.274	YES	YES	3.121	1391.15	1101.53	1.26
PARP12	593.485	YES	YES	2.515	1232.05	977.75	1.26
PLOD3	857.104	YES	YES	2.72	1935.14	1538.47	1.26
POFUT1	665.883	YES	YES	3.124	1812.72	1439.14	1.26
PRMT5	669.211	YES	YES	2.821	1566.68	1246.26	1.26
RDH11	795.555	YES	YES	2.685	1891.74	1503.39	1.26
SH3PXD2B	842.461	YES	YES	1.96	1379.42	1098.59	1.26
SKAP2	682.345	YES	YES	2.415	1406.21	1114.26	1.26
SLC26A2	1927.03	YES	YES	1.774	699.32	553.56	1.26
SMC4	1253.16	YES	YES	2.183	1870.93	1489.65	1.26
SNX10	533.981	YES	YES	1.774	666.2	527.61	1.26
SSFA2	1695.23	YES	YES	2.692	2584.8	2049.87	1.26
TSN	1162.7	YES	YES	3.189	2262.7	1802.17	1.26
UBE2L6	1292.44	YES	YES	2.155	2300.36	1820.03	1.26
YWHAB	1784.73	YES	YES	3.811	7671.01	6079.56	1.26
ACSL4	1317.97	YES	YES	1.972	2047.16	1641.38	1.25
ACTN4	4835.48	YES	YES	2.647	11514.4	9233.43	1.25
ATP5G3	1289.97	YES	YES	2.981	3360.44	2696.8	1.25
DKC1	685.521	YES	YES	2.846	1733.12	1388.67	1.25
EIF5AL1	653.976	YES	YES	2.875	1644.57	1310.65	1.25
FXR1	706.682	YES	YES	3.117	2112.89	1696.1	1.25
HEBP2	677.728	YES	YES	2.387	1180.77	944.28	1.25
IFIT3	989.976	YES	YES	1.71	1033.1	825.12	1.25
MMADHC	632.066	YES	YES	3.237	1883.48	1509.66	1.25
NME1	1314.74	YES	YES	2.171	2132.65	1700.6	1.25
PALLD	1843.33	YES	YES	1.978	2988.28	2395.91	1.25
PSMA4	948.583	YES	YES	3.04	2601.37	2078.45	1.25
RUVBL1	620.997	YES	YES	2.548	1238.36	993.7	1.25
SNRPD2	1898.26	YES	YES	2.487	2776	2221.5	1.25
TIMP1	6712.5	YES	YES	1.918	10077.1	8034.63	1.25
TMX1	579.5	YES	YES	2.768	1500.68	1203.4	1.25
TRAM2	526.013	YES	YES	2.349	1208.2	968.35	1.25
UBE2N	717.587	YES	YES	3.168	2117.68	1691.89	1.25
CDV3	1215.83	YES	YES	2.927	3854	3102.13	1.24
CNIH	986.804	YES	YES	2.443	1757.83	1414.46	1.24
CPT1A	791.56	YES	YES	2.286	1508.37	1212.84	1.24
EIF2S2	605.715	YES	YES	3.313	2142.88	1731.35	1.24
FYTTD1	557.661	YES	YES	2.932	1544.79	1244.34	1.24
GYG1	501.013	YES	YES	2.618	1033.44	836.12	1.24
KLHL5	786.892	YES	YES	1.947	1015.05	817.72	1.24
LGALS1	4366.28	YES	YES	1.668	4162.13	3355.97	1.24
LSM1	702.697	YES	YES	2.244	667.62	539.8	1.24
LTBR	1360.18	YES	YES	2.395	2829.21	2282.19	1.24
MCM3	1110.48	YES	YES	2.453	2248.4	1811.52	1.24
MRPL13	533.983	YES	YES	2.358	801.56	643.92	1.24
MRPS10	542.771	YES	YES	2.803	1248.48	1006.96	1.24
MTHFD1	663.263	YES	YES	2.789	1590.35	1282.07	1.24
NOP10	614.981	YES	YES	2.569	1318.93	1066.72	1.24
NUAK1	560.326	YES	YES	1.654	536.78	432.89	1.24
P4HA1	1559.07	YES	YES	2.125	2274.51	1832.88	1.24
PA2G4	1292.29	YES	YES	2.977	3340.53	2702.1	1.24
PIP4K2C	916.497	YES	YES	2.687	1851.21	1494.74	1.24
PITPNC1	567.965	YES	YES	1.741	483.49	388.45	1.24
PLEKHA2	521.547	YES	YES	2.063	1005.19	812.54	1.24
PPP1CC	941.309	YES	YES	3.162	3170.27	2557.92	1.24
PRMT1	886.546	YES	YES	2.848	2416.51	1949.53	1.24
PSMA5	898.718	YES	YES	2.71	2126.87	1717.67	1.24
PTPN11	976.7	YES	YES	2.81	2745.49	2208.71	1.24
RAB11A	1119.61	YES	YES	3.084	3199.03	2582.49	1.24
RHOC	3018.32	YES	YES	2.231	4877.59	3927.81	1.24
TMSB10	20572.7	YES	YES	1.949	27373.3	22118.5	1.24
TRIB3	665.998	YES	YES	1.858	751.49	603.72	1.24
YEATS4	1241.17	YES	YES	1.927	379.01	306.5	1.24
ABHD4	599.358	YES	YES	2.289	1191.68	965.79	1.23
ACAA2	727.828	YES	YES	2.085	1239.44	1005.21	1.23
APOL6	1382.13	YES	YES	2.042	2501.47	2038.65	1.23
ARFGEF2	554.259	YES	YES	2.678	1635.47	1334.86	1.23
ARPC3	2138.26	YES	YES	2.721	5305.03	4310.34	1.23
ATP2A2	3303.19	YES	YES	2.602	9414.57	7649.32	1.23
CALD1	2341.07	YES	YES	1.843	3729.27	3037.21	1.23
CALM3	1539.61	YES	YES	3.046	5129.59	4174.21	1.23
CKAP5	1028.23	YES	YES	2.375	2301.48	1876.55	1.23
DNTTIP1	1226.26	YES	YES	1.793	1177.13	955.27	1.23
G3BP1	661.808	YES	YES	2.972	2233.8	1812.19	1.23
GOLGA7	826.262	YES	YES	2.457	1309.72	1067.99	1.23
KLF6	1844.36	YES	YES	2.091	3532.93	2864.76	1.23
KPNB1	1793.42	YES	YES	2.747	5662.57	4622.09	1.23
NAV1	737.765	YES	YES	1.775	1105.13	895.58	1.23
NCKAP1	1470.37	YES	YES	2.891	4595.58	3750.38	1.23
PLK2	906.611	YES	YES	1.649	925.01	754.13	1.23
PSMA2	985.081	YES	YES	2.715	2604.14	2122.06	1.23
PSMA3	893.24	YES	YES	2.428	1808.89	1471.43	1.23
PSMB5	996.923	YES	YES	2.72	2643.86	2145.49	1.23
RANGAP1	904.167	YES	YES	2.65	2272.89	1841.83	1.23
RCC2	1942.79	YES	YES	2.547	4181.36	3402.46	1.23
SH3BP2	562.938	YES	YES	2.331	1210.26	986.05	1.23
SR140	950.933	YES	YES	2.724	2236.57	1819.5	1.23
TFG	911.452	YES	YES	2.919	2754.06	2236.08	1.23
TMOD3	700.803	YES	YES	2.801	1978.45	1611.59	1.23
TPD52	1914.71	YES	YES	2.144	2840.78	2315.93	1.23
ARPC1A	1437.98	YES	YES	2.555	3226.1	2636.63	1.22
BRIX1	551.39	YES	YES	2.137	998.81	816.6	1.22
C12orf35	703.511	YES	YES	1.998	1147.93	942.7	1.22
CAPZA1	1297.47	YES	YES	2.815	4124.2	3385.38	1.22
DDHD2	1524.68	YES	YES	1.963	925.2	757.03	1.22
DLD	620.401	YES	YES	2.766	1597.43	1312.38	1.22
FAM3C	2372.3	YES	YES	1.834	2105.95	1722.48	1.22
FNDC3B	1322.93	YES	YES	2.27	2943.81	2419.98	1.22
GNAI3	642.321	YES	YES	2.963	2297.63	1886.33	1.22
GOLT1B	881.077	YES	YES	2.139	1440.72	1177.13	1.22
GTF2A2	565.752	YES	YES	2.547	827.33	680.48	1.22
H2AFX	536.156	YES	YES	1.964	940.35	772.01	1.22
IFIH1	799.905	YES	YES	1.768	793.02	650.05	1.22
LMAN1	1836.65	YES	YES	2.425	4676.94	3826.74	1.22
NUP62	565.074	YES	YES	2.854	1854.54	1524.62	1.22
PKIG	522.347	YES	YES	1.843	743.46	607.96	1.22
PL-5283	612.173	YES	YES	2.681	1560.64	1275.26	1.22
POP4	626.611	YES	YES	2.224	701.83	575.13	1.22
PRKDC	2603.9	YES	YES	1.957	4544.56	3724.57	1.22
PSMC2	777.283	YES	YES	2.706	2032.11	1667.35	1.22
PSMD7	710.367	YES	YES	2.814	2177.47	1783.22	1.22
PTGES3	2255.1	YES	YES	2.87	7072.4	5797.65	1.22
RUVBL2	578.4	YES	YES	2.581	1640.75	1342.64	1.22
SNRPB	2050.67	YES	YES	2.222	3756.67	3072.56	1.22
SULT1A3	518.134	YES	YES	1.896	824.08	673.76	1.22
TRIP12	1135.19	YES	YES	2.711	3461.19	2837.41	1.22
TUBG1	509.296	YES	YES	2.264	1142.27	938.84	1.22
UFD1L	537.919	YES	YES	2.766	1273.5	1040.61	1.22
USP14	596.012	YES	YES	2.587	1622.11	1330.73	1.22
VCL	1341.41	YES	YES	2.337	3153.26	2579.88	1.22
YKT6	1010.81	YES	YES	2.531	2715.94	2232.47	1.22
ALDH1B1	548.573	YES	YES	1.973	888.35	734.34	1.21
ARF6	1065.68	YES	YES	2.892	3733.62	3080.11	1.21
B3GNT2	524.769	YES	YES	2.381	953.43	786.87	1.21
B4GALT5	1287.58	YES	YES	2.198	2837.33	2349.51	1.21
CAPZA2	10255	YES	YES	1.884	3239.6	2671.5	1.21
CCT4	1557.12	YES	YES	2.626	3880.14	3194.93	1.21
CFL1	5478.7	YES	YES	2.984	19673.3	16247.1	1.21
EIF5A	3122.09	YES	YES	2.333	6942.88	5730.87	1.21
ERH	967.917	YES	YES	2.352	2152.61	1778.79	1.21
EXOC5	540.302	YES	YES	2.507	1428.16	1178.28	1.21
FKBP3	660.961	YES	YES	2.231	1390.94	1148.35	1.21
GSK3A	496.114	YES	YES	2.996	1697.12	1399.28	1.21
HSP90B1	11082	YES	YES	2.142	23827.5	19765.2	1.21
KDM1A	763.369	YES	YES	2.675	1887.07	1558.43	1.21
KPNA1	512.072	YES	YES	2.865	1598.7	1322.71	1.21
MIB1	620.363	YES	YES	2.356	1447.32	1201.08	1.21
MRPL3	769.963	YES	YES	2.603	2125.41	1751.48	1.21
MRPL37	670.059	YES	YES	2.721	1540.03	1272.01	1.21
NUDT4	532.627	YES	YES	2.164	839.08	694.5	1.21
PSMB8	1762.93	YES	YES	1.71	2630.52	2180.24	1.21
PSMC6	701.606	YES	YES	2.409	1594.34	1314.97	1.21
PSME3	687.971	YES	YES	3.144	2798.1	2314.11	1.21
RBBP8	604.484	YES	YES	2.189	1013.36	835.88	1.21
SLC25A24	498.121	YES	YES	2.107	1117.36	926.48	1.21
STOML2	879.765	YES	YES	2.173	1684.57	1396.35	1.21
TBRG4	550.617	YES	YES	2.197	1262.08	1046.88	1.21
TFDP1	669.01	YES	YES	2.411	1773.75	1462.31	1.21
TMED2	3891.33	YES	YES	2.382	9054.91	7458.89	1.21
TNPO1	785.589	YES	YES	2.751	2641.58	2191.16	1.21
TOMM5	643.185	YES	YES	2.175	990.83	819.12	1.21
WHSC1L1	1249.05	YES	YES	2.044	1215.79	1002.98	1.21
XRCC5	1868.59	YES	YES	3.104	7244.54	6000.45	1.21
ZNF146	991.06	YES	YES	2.377	2297.26	1894.39	1.21
BOLA2	819.308	YES	YES	1.957	1292.38	1073.48	1.2
CLSTN1	2403.64	YES	YES	2.123	5489.77	4569.1	1.2
COX5A	625.211	YES	YES	2.278	1546.35	1290.28	1.2
DNTTIP2	505.174	YES	YES	2.575	1514.32	1263.71	1.2
EIF4G1	3518.59	YES	YES	2.396	10202.9	8467.79	1.2
ERLIN2	1986.11	YES	YES	1.846	1752.89	1456.65	1.2
FAM65A	580.421	YES	YES	1.866	1137.05	945.22	1.2
GTF3A	1081.27	YES	YES	2.127	2166.51	1802.55	1.2
HDGF	3709.85	YES	YES	2.298	9181.68	7648.44	1.2
HS2ST1	734.456	YES	YES	2.06	1236.71	1033	1.2
LAP3	1286.86	YES	YES	2.103	2824.66	2350.76	1.2
LRP11	631.927	YES	YES	2.01	1364.79	1140.64	1.2
NCOA3	703.703	YES	YES	2.328	1741.8	1445.58	1.2
NDUFB5	776.111	YES	YES	2.135	1400.29	1170.21	1.2
PLIN3	871.101	YES	YES	2.168	1930.84	1608.24	1.2
PSMB2	855.193	YES	YES	2.765	2591.24	2152.72	1.2
PSME4	652.614	YES	YES	2.662	2086.7	1739.03	1.2
RAP1B	2044.12	YES	YES	1.989	2524.71	2110.18	1.2
RNF7	568.953	YES	YES	2.357	1362.99	1139.77	1.2
ROD1	1195.7	YES	YES	2.589	3663.77	3047.44	1.2
S100A11	6405.36	YES	YES	1.849	12123.7	10132.4	1.2
SPINT2	7925.21	YES	YES	1.918	13402.9	11176.8	1.2
SRPRB	688.886	YES	YES	2.286	1668.4	1392.16	1.2
TRIM25	510.927	YES	YES	2.061	1123.96	933.04	1.2
USP5	655.761	YES	YES	2.485	2055.86	1718.25	1.2
VBP1	549.007	YES	YES	2.308	1142.49	951.47	1.2
WBP11	560.456	YES	YES	2.8	1929.16	1602.44	1.2
ZNF532	567.304	YES	YES	2.026	1401.94	1166.19	1.2
CLIC1	4509.63	YES	YES	2.23	9412.47	7895.27	1.19
COX6B1	3359.99	YES	YES	1.845	3148.85	2643.66	1.19
DAD1	1217	YES	YES	2.264	3056.44	2575.22	1.19
DEK	1223.62	YES	YES	2.275	3243.84	2732.14	1.19
DHX15	875.236	YES	YES	2.654	3070.4	2585.99	1.19
DVL3	833.07	YES	YES	2.264	2270.94	1909.71	1.19
EIF4A3	874.941	YES	YES	2.275	2084.01	1746.7	1.19
ETFA	545.786	YES	YES	2.425	1445.55	1211.43	1.19
FOSL2	1153.58	YES	YES	1.648	1887.31	1588.02	1.19
FUBP1	497.132	YES	YES	2.327	1664.21	1392.96	1.19
H2AFY	1232.48	YES	YES	2.658	4323.1	3629.67	1.19
HLTF	656.966	YES	YES	1.68	1005.96	847.58	1.19
ITGB5	1575.47	YES	YES	1.934	3264.15	2742.68	1.19
KRT18	10214.2	YES	YES	1.737	15930.1	13386.1	1.19
LBR	637.24	YES	YES	2.193	1639.91	1377.17	1.19
MAFG	538.72	YES	YES	1.905	944.54	794.01	1.19
MARVELD1	588.037	YES	YES	1.649	957.45	803.99	1.19
MDH1	758.689	YES	YES	2.71	2510.53	2103.1	1.19
MGST3	712.092	YES	YES	2.106	1671.34	1403.16	1.19
MLXIP	536.051	YES	YES	1.837	1237.93	1037.5	1.19
MTCH2	564.791	YES	YES	2.467	1735.19	1457.02	1.19
OSTC	1105.48	YES	YES	2.109	2256.8	1900.16	1.19
PDIA4	6522.24	YES	YES	1.814	10175.4	8521.35	1.19
PIM1	643.505	YES	YES	1.857	1262.56	1057.65	1.19
PML	1189.34	YES	YES	1.824	2177.46	1835.1	1.19
PPP2R1B	694.828	YES	YES	1.982	844.86	711.39	1.19
PRDX1	7543.83	YES	YES	1.743	9545.4	8051.45	1.19
PSMD8	2062.38	YES	YES	2.224	3299.07	2763.92	1.19
RDX	1742.03	YES	YES	1.97	2067.3	1740.97	1.19
SEC14L1	1008.96	YES	YES	1.858	2091.32	1755.16	1.19
SNX9	602.371	YES	YES	2.177	1534.97	1288.95	1.19
SRC	915.34	YES	YES	2.009	1981.58	1669.55	1.19
SRP72	1097.66	YES	YES	2.478	2828.96	2371.97	1.19
TM2D2	1312.68	YES	YES	1.944	1129.61	948.32	1.19
TRA2B	588.646	YES	YES	3.191	2543.79	2129.96	1.19
UBE3C	661.31	YES	YES	2.56	2251.04	1892.2	1.19
WTAP	518.499	YES	YES	2.602	1750.1	1473.53	1.19
XPO5	616.943	YES	YES	2.073	1305.94	1100.58	1.19
AMFR	840.653	YES	YES	2.117	2116.64	1788.75	1.18
CCNG2	728.84	YES	YES	1.901	1313.3	1114.51	1.18
CCT7	1475.48	YES	YES	2.488	4920.45	4172.29	1.18
CD276	836.268	YES	YES	2.256	2382.2	2010.84	1.18
CDK2AP1	1093.46	YES	YES	2.025	2422.99	2050.04	1.18
COX7B	1089.14	YES	YES	1.744	1493.87	1262.13	1.18
CUL4B	512.065	YES	YES	2.644	1753.26	1480.08	1.18
DCTPP1	720.326	YES	YES	1.765	928.55	789.64	1.18
DNAJB1	1718.21	YES	YES	1.889	2983.48	2531.5	1.18
EIF5B	1542.32	YES	YES	1.904	3513.07	2984.54	1.18
GALNT2	1562.01	YES	YES	1.96	3513.37	2983.71	1.18
GART	625.198	YES	YES	2.167	1518.12	1289.08	1.18
GCN1L1	1126.49	YES	YES	2.041	3095.52	2631.06	1.18
HNRNPR	797.53	YES	YES	2.624	2928.17	2485.88	1.18
HPS3	506.449	YES	YES	2.09	1268.75	1074.9	1.18
JUP	4648.74	YES	YES	1.716	8587.66	7259.25	1.18
LSM14A	1107.38	YES	YES	2.305	2891.15	2454.81	1.18
M6PR	1144.92	YES	YES	2.405	3430.42	2910.91	1.18
PRPF40A	669.092	YES	YES	2.698	2463.86	2083.58	1.18
PSMB7	802.862	YES	YES	2.201	1857.07	1570.86	1.18
RBBP7	770.101	YES	YES	2.336	2415.57	2054.38	1.18
RFK	657.111	YES	YES	1.672	816.84	691.71	1.18
SERINC3	778.965	YES	YES	2.242	2456.67	2081.83	1.18
SH3BGRL3	2835.07	YES	YES	1.803	5024.62	4249.26	1.18
SLC35A2	1347.69	YES	YES	1.908	1369.93	1159.05	1.18
SMC3	639.122	YES	YES	2.107	1293.1	1091.55	1.18
SUPT16H	1037.31	YES	YES	2.311	2872.61	2428.98	1.18
TES	1346.55	YES	YES	1.997	2432.09	2058.8	1.18
TGIF1	832.922	YES	YES	1.864	1786.82	1518.71	1.18
TPM3	3805.82	YES	YES	2.372	11004.4	9352.47	1.18
YES1	655.399	YES	YES	2.028	1553.51	1316.06	1.18
YWHAQ	2887.8	YES	YES	2.136	7215.95	6137.21	1.18
ALG3	513.728	YES	YES	1.936	1198.84	1023.59	1.17
ANAPC5	800.559	YES	YES	2.236	2424.74	2079.56	1.17
ANKRD52	608.364	YES	YES	1.735	1322.31	1126.24	1.17
ANO6	689.751	YES	YES	1.856	1797.74	1532.11	1.17
ATIC	739.373	YES	YES	2.144	2157.63	1849.53	1.17
CANT1	1169.63	YES	YES	1.934	2713.91	2327.48	1.17
CAP1	2605	YES	YES	2.287	8616.22	7391.09	1.17
CLDND1	609.983	YES	YES	1.974	1429.21	1223.18	1.17
CSDA	1292.81	YES	YES	1.81	3116.94	2668.78	1.17
DNAJB6	573.032	YES	YES	2.138	1652.48	1415.5	1.17
EFTUD2	664.763	YES	YES	2.554	2558.13	2184.25	1.17
EIF4A2	2980.38	YES	YES	1.889	6821.17	5853.91	1.17
EIF5	1341.76	YES	YES	2.174	4295.22	3681.49	1.17
FAM91A1	603.917	YES	YES	2.163	1596.18	1365.49	1.17
GOT2	766.452	YES	YES	2.109	2057.59	1764.93	1.17
LRRC59	1530.16	YES	YES	2.271	4798.91	4095.62	1.17
MAST2	797.331	YES	YES	1.789	1272.14	1084.09	1.17
MFF	547.904	YES	YES	2.155	1239.22	1062.87	1.17
NRD1	1101.26	YES	YES	2.329	3062.39	2620.44	1.17
NSUN2	1044	YES	YES	1.82	2137.81	1832.45	1.17
OSBPL8	546.252	YES	YES	2.056	1591.71	1361.31	1.17
PAK1	738.248	YES	YES	1.947	1919.63	1642.5	1.17
PLRG1	960.696	YES	YES	2.193	924.23	786.92	1.17
POLR2H	499.885	YES	YES	1.866	1039.82	885.96	1.17
PPM1G	922.842	YES	YES	2.425	3223.76	2753.99	1.17
PRPS2	1678.38	YES	YES	1.718	1228.85	1054.5	1.17
PSMA7	1676.76	YES	YES	1.981	3635.42	3094.49	1.17
PTDSS1	651.498	YES	YES	2.185	1857.38	1589.6	1.17
SELT	1777.56	YES	YES	1.814	2505.75	2140.98	1.17
SEPHS2	1532.2	YES	YES	1.775	2416.83	2060.98	1.17
SHFM1	1027.61	YES	YES	1.818	1946.15	1656.56	1.17
SIPA1L1	610.859	YES	YES	1.86	1226.46	1045.33	1.17
SLBP	555.116	YES	YES	1.969	1310.4	1123.17	1.17
SLC3A2	1574.11	YES	YES	1.893	3578.44	3061	1.17
SP1	720.137	YES	YES	2.326	2517.41	2159.62	1.17
SSB	728.441	YES	YES	2.364	2238.12	1918.71	1.17
TM9SF4	755.264	YES	YES	2.279	2639.6	2257.89	1.17
TMEM181	673.017	YES	YES	1.782	1335.7	1140.99	1.17
U2AF2	913.447	YES	YES	2.378	3210.76	2743.03	1.17
UGGT1	1034.85	YES	YES	1.884	2614.05	2239.41	1.17
UQCRFS1	957.515	YES	YES	1.817	1478.48	1262.56	1.17
AMD1	681.97	YES	YES	2.067	1932.29	1668.98	1.16
AP2A1	666.702	YES	YES	1.931	2077.31	1796.71	1.16
ASH2L	950.744	YES	YES	1.723	1047.66	901.15	1.16
B4GALT1	3106.19	YES	YES	1.717	6701.5	5782.74	1.16
C22orf28	590.908	YES	YES	2.32	1817.69	1563.32	1.16
CCT8	1286.3	YES	YES	2.1	3720.27	3211.15	1.16
CD164	4713.35	YES	YES	1.814	8049.48	6926.46	1.16
CNBP	2167.51	YES	YES	2.231	7128.35	6139.59	1.16
COPB2	1253.68	YES	YES	2.314	4289.21	3686.46	1.16
DARS	619.795	YES	YES	2.29	2080.11	1788.61	1.16
EIF3M	743.039	YES	YES	2.277	2395.51	2057.98	1.16
FKBP9	1650.97	YES	YES	1.767	3411.47	2944.46	1.16
GNA13	672.382	YES	YES	2.08	2068.94	1781.86	1.16
HMGB1	1720.87	YES	YES	2.152	4912.95	4236	1.16
IPO4	664.564	YES	YES	1.679	1215.18	1044.11	1.16
ITCH	514.469	YES	YES	2.127	1633.7	1413.05	1.16
KARS	929.916	YES	YES	2.176	3107.14	2682.55	1.16
KCTD5	531.555	YES	YES	1.862	1051.21	905.34	1.16
KLF3	639.329	YES	YES	2.075	1849.63	1595.23	1.16
NAA20	610.532	YES	YES	1.735	1271.75	1099.34	1.16
NCBP2	634.467	YES	YES	2.165	1885.85	1623.54	1.16
NCL	3862.99	YES	YES	2.049	11911.5	10259.4	1.16
NPTN	1046.68	YES	YES	1.954	2729.42	2360.44	1.16
POLR2B	872.704	YES	YES	2.212	2319.6	2006.37	1.16
PPP3R1	512.888	YES	YES	2.37	1816.05	1567.5	1.16
PSMB1	1295.01	YES	YES	1.839	2798.13	2416.17	1.16
PTMA	5717.45	YES	YES	2.249	19897.4	17208.5	1.16
RPN2	4509.15	YES	YES	1.849	10546.2	9121.76	1.16
RPRD1A	751.419	YES	YES	1.694	1253.54	1076.87	1.16
SELS	578.906	YES	YES	1.941	1453.18	1253.08	1.16
SRPK1	747.775	YES	YES	1.934	1958.79	1682.01	1.16
STRN4	628.411	YES	YES	1.915	1850.25	1601.6	1.16
SYNCRIP	966.273	YES	YES	2.368	3540.42	3043.06	1.16
SYPL1	1212.56	YES	YES	1.921	2909.79	2513.23	1.16
TBL1XR1	1085.99	YES	YES	2.186	3293.79	2844.98	1.16
TDP2	616.883	YES	YES	1.877	1103.89	947.95	1.16
TXNL1	528.894	YES	YES	1.868	1312.73	1135	1.16
VPS29	656.311	YES	YES	1.864	1333.68	1151.37	1.16
WDR1	2190.58	YES	YES	2.188	6992.62	6051.37	1.16
XPO1	1190.45	YES	YES	2.291	4055.1	3486.11	1.16
YME1L1	1047.91	YES	YES	2.349	3664.99	3160.28	1.16
ZBTB38	669.636	YES	YES	1.898	1886.62	1632.11	1.16
ZNF410	497.956	YES	YES	1.887	1075.19	930.67	1.16
ACTR2	1769.7	YES	YES	2.365	7600.31	6600.19	1.15
ADNP	743.261	YES	YES	1.994	2275.49	1973.82	1.15
ARPC5	2332.48	YES	YES	1.802	5224.13	4541.77	1.15
ATP5C1	1205.9	YES	YES	1.771	2930.03	2552.61	1.15
C12orf23	747.034	YES	YES	1.71	1641.07	1425.25	1.15
C22orf9	930.79	YES	YES	1.659	2045.64	1776.67	1.15
CDC42BPB	1237.16	YES	YES	1.719	3096.21	2684.93	1.15
CDK16	1055.62	YES	YES	1.775	2298.43	2006.98	1.15
CLIP1	717.375	YES	YES	1.812	1945.53	1690.15	1.15
CRKL	1622.33	YES	YES	1.793	2115.01	1844.67	1.15
EBNA1BP2	567.511	YES	YES	1.891	1323.53	1150.23	1.15
GALNT1	1238.38	YES	YES	1.685	2564.15	2232.04	1.15
IPO5	1237.22	YES	YES	1.801	3060.11	2661.85	1.15
KIF5B	1627.15	YES	YES	1.985	4642.95	4044.15	1.15
LARP1	1662.58	YES	YES	1.674	4543.7	3957.6	1.15
MLF2	1546.24	YES	YES	1.849	3837.26	3331.37	1.15
MSH6	682.577	YES	YES	1.724	1467.45	1274.86	1.15
PLOD1	1865.47	YES	YES	1.707	3872.12	3352.55	1.15
PRR13	1067.74	YES	YES	1.912	2907.83	2528.38	1.15
RAB7A	1459.64	YES	YES	2.38	5982.92	5196.3	1.15
SAPS1	831.886	YES	YES	1.815	2360.11	2052.93	1.15
SERBP1	1607.49	YES	YES	2.228	5947.02	5169.3	1.15
SET	1985.5	YES	YES	2.017	5850.87	5074.31	1.15
SMARCD1	638.383	YES	YES	1.962	1386.32	1206.58	1.15
SUMO1	712.203	YES	YES	2.143	2472.14	2152.07	1.15
TOMM22	692.797	YES	YES	1.723	1474.41	1286.58	1.15
UBE2Z	740.399	YES	YES	2.387	3155.23	2739.17	1.15
VPS35	947.221	YES	YES	2.08	3077.4	2670.32	1.15
XRN2	734.477	YES	YES	1.788	2252.41	1960.5	1.15
ARPP19	1068.54	YES	YES	1.889	3579.41	3150	1.14
C14orf166	809.49	YES	YES	1.827	2320.28	2038.12	1.14
CDK12	1104.01	YES	YES	1.651	1486.01	1299.17	1.14
CMTM6	1159.56	YES	YES	1.861	3224.05	2818.12	1.14
COPS6	922.856	YES	YES	1.783	2053.99	1796.74	1.14
DDX18	799.099	YES	YES	2.056	2128.71	1862.84	1.14
DDX23	746.952	YES	YES	2.319	3005.4	2626.39	1.14
GRSF1	643.187	YES	YES	2.091	2295.49	2013.23	1.14
HNRNPD	1188.22	YES	YES	1.986	4165.01	3648.11	1.14
METTL9	782.931	YES	YES	1.778	2231.76	1962.15	1.14
MTA2	543.404	YES	YES	2.099	2101.27	1844.15	1.14
NUTF2	733.951	YES	YES	1.775	1867.63	1636.59	1.14
PAPOLA	1704.2	YES	YES	1.837	4293.2	3750.01	1.14
PCBP2	2826.84	YES	YES	1.985	10157.1	8934.44	1.14
PREB	548.428	YES	YES	1.845	1542.88	1357.9	1.14
PSMA1	1059.59	YES	YES	1.802	2705.69	2382.59	1.14
SFPQ	1526.21	YES	YES	2.034	4785.57	4202.52	1.14
SNX3	1307.86	YES	YES	1.669	2792.72	2456.86	1.14
TRIM28	2027.95	YES	YES	1.747	5549.91	4872.14	1.14
USP10	508.859	YES	YES	1.849	1529.76	1341.15	1.14
VPS26A	540.617	YES	YES	1.811	1600.45	1409.6	1.14
ZNF706	560.767	YES	YES	1.708	1321.03	1155.81	1.14
AHSA1	754.785	YES	YES	1.647	1990.78	1760.14	1.13
EIF4A1	3583.58	YES	YES	1.722	10373.3	9190.05	1.13
RALBP1	720.564	YES	YES	1.694	1894.5	1669.64	1.13
SF3B3	1147.99	YES	YES	1.799	3572.12	3148.38	1.13
STK38	597.661	YES	YES	1.647	1662.31	1471.19	1.13
UBC	9323.8	YES	YES	1.964	33675.6	29701.3	1.13
UBE2K	877.436	YES	YES	1.736	2216.35	1957.03	1.13
YWHAH	1284.8	YES	YES	1.743	3742.71	3302.42	1.13
ANP32B	837.332	YES	YES	1.72	2862.1	2556.22	1.12
DERL1	765.619	YES	YES	1.782	2456.83	2189.87	1.12
EIF4G2	6242.37	YES	YES	1.688	22672.6	20309.4	1.12
HSPA4	693.848	YES	YES	1.664	2226.83	1989.12	1.12
NRBP1	587.92	YES	YES	1.938	2445.94	2174.57	1.12
NUDT21	553.351	YES	YES	1.709	1993.95	1783.52	1.12
PES1	567.191	YES	YES	1.651	1569.13	1394.97	1.12
PTP4A2	1010.34	YES	YES	1.679	2912.91	2589.45	1.12
RPN1	2729.32	YES	YES	1.726	8736.8	7786.69	1.12
SSRP1	1229.01	YES	YES	1.671	3795.14	3379.57	1.12
STARD7	1052.43	YES	YES	1.827	3880.63	3477.21	1.12
STAU1	1039.87	YES	YES	1.684	3683.29	3294.6	1.12
UBE2L3	738.777	YES	YES	1.697	2023	1805.89	1.12
UBE2V1	783.137	YES	YES	1.841	3041.11	2710.1	1.12
CAPRIN1	1420.28	YES	YES	1.689	5845.24	5279.79	1.11
HNRNPC	2583.27	YES	YES	1.754	9679.5	8687.63	1.11
HNRNPL	1156.12	YES	YES	1.937	5713.03	5159.59	1.11
KHDRBS1	774.141	YES	YES	1.965	3746.11	3375.33	1.11
PPP2CA	790.655	YES	YES	1.659	2813.14	2526.45	1.11
PRPF19	738.314	YES	YES	1.671	2481.74	2229.68	1.11
SFRS1	945.608	YES	YES	1.745	4403.57	4000.08	1.1
NMT1	559.5	YES	YES	1.646	2656.81	2428.09	1.09
BSDC1	602.351	YES	YES	-1.626	1859.13	2054.07	0.91
DDX5	2787.58	YES	YES	-1.698	10882.5	11993	0.91
GSPT1	1341.49	YES	YES	-1.556	3287.41	3661.42	0.9
OAZ2	526.394	YES	YES	-1.645	1587.16	1764	0.9
QARS	1046.33	YES	YES	-1.668	2980.76	3322.68	0.9
TOR1AIP1	511.991	YES	YES	-1.651	1523.65	1701.62	0.9
ACOX1	654.732	YES	YES	-1.709	1726.53	1939.61	0.89
ARF1	4269.62	YES	YES	-1.731	12080.6	13586	0.89
ATF6B	875.251	YES	YES	-1.637	2195	2466.03	0.89
ATP6V0D1	1037.91	YES	YES	-1.557	2169.75	2451.13	0.89
C6orf89	731.348	YES	YES	-1.889	2333.97	2632.99	0.89
CPSF3L	502.347	YES	YES	-1.736	1425.11	1608.84	0.89
CTDSP1	844.231	YES	YES	-1.773	2625.28	2948.32	0.89
EIF3G	783.923	YES	YES	-1.601	1977.85	2217.96	0.89
ENSA	1936.24	YES	YES	-1.562	4303.79	4837.32	0.89
EXOC7	904.419	YES	YES	-1.829	2785.21	3128.61	0.89
PRMT2	506.709	YES	YES	-1.819	1492.39	1685.7	0.89
PTPN18	687.27	YES	YES	-1.56	1425.53	1605.63	0.89
SLC35A4	588.929	YES	YES	-1.85	1730.71	1952.65	0.89
SURF4	2359.62	YES	YES	-1.792	6774.84	7632.92	0.89
TMED4	576.707	YES	YES	-1.592	1343.6	1505.73	0.89
UFC1	1006.29	YES	YES	-1.56	2221.58	2504.6	0.89
WDR26	873.426	YES	YES	-1.866	2832.26	3176.84	0.89
WDTC1	601.223	YES	YES	-1.672	1750.95	1968.15	0.89
YY1AP1	688.89	YES	YES	-1.753	1802.01	2024.54	0.89
AK2	1469.54	YES	YES	-1.611	2847.31	3238.35	0.88
ANKRD13A	635.511	YES	YES	-1.668	1359.41	1547.92	0.88
ARHGAP1	1030.99	YES	YES	-1.783	2783.03	3162.62	0.88
BET1L	654.915	YES	YES	-1.942	1815.75	2070.47	0.88
C19orf56	601.611	YES	YES	-1.781	1491.95	1692.21	0.88
CREBBP	936.841	YES	YES	-1.584	2063.64	2349.45	0.88
DCTN4	525.252	YES	YES	-1.821	1331.9	1510.25	0.88
DDX17	2871.65	YES	YES	-1.885	7331.63	8378.24	0.88
EDF1	1640.15	YES	YES	-1.617	3216.41	3654.71	0.88
GLYR1	662.869	YES	YES	-2.028	2086.77	2373.08	0.88
INTS3	855.118	YES	YES	-1.553	1876.93	2124.41	0.88
ISCU	545.011	YES	YES	-1.687	1342.84	1517.5	0.88
LMAN2	2034.4	YES	YES	-1.556	3671.15	4181.94	0.88
LRRC41	662.708	YES	YES	-1.969	1875.54	2129.83	0.88
MTMR12	522.579	YES	YES	-1.563	1078.43	1221.46	0.88
NDUFV1	789.107	YES	YES	-1.723	1990.26	2260.22	0.88
PIK3R2	607.983	YES	YES	-1.663	1276.49	1448.47	0.88
PYGO2	678.302	YES	YES	-1.786	1580.99	1793.8	0.88
SCAMP2	1467.68	YES	YES	-1.704	2573.84	2927.42	0.88
SLC44A2	1611.17	YES	YES	-1.676	3763.02	4276.08	0.88
SSR2	3473.97	YES	YES	-1.597	6335.53	7225.43	0.88
STAT6	1505.69	YES	YES	-1.768	3703.43	4230.65	0.88
STXBP2	682.977	YES	YES	-1.749	1759.97	1999.52	0.88
TCEB3	688.026	YES	YES	-1.845	1658.61	1885.13	0.88
TRAK2	538.624	YES	YES	-1.624	1188.78	1348.49	0.88
WBP2	1083.91	YES	YES	-1.904	2802.66	3202.45	0.88
YPEL5	1219.36	YES	YES	-1.592	2265.67	2575.71	0.88
ZC3H7B	852.19	YES	YES	-1.588	2110.32	2392.15	0.88
ANXA11	1941.44	YES	YES	-1.76	4798.52	5488.39	0.87
ARNT	552.581	YES	YES	-1.962	1313.77	1508.01	0.87
BTBD6	621.308	YES	YES	-1.75	1243.22	1435.79	0.87
C17orf62	821.265	YES	YES	-1.786	1874.58	2147	0.87
C19orf6	942.423	YES	YES	-1.568	1900.8	2179.1	0.87
C2orf24	515.536	YES	YES	-2.15	1565.27	1795.2	0.87
CCDC6	903.932	YES	YES	-1.612	1930.03	2210.81	0.87
CCPG1	1198.31	YES	YES	-1.638	2170.45	2497.18	0.87
CDIPT	774.458	YES	YES	-2.068	1755.7	2029.26	0.87
CHD2	896.95	YES	YES	-1.639	2001.37	2306.46	0.87
CTTN	2421.75	YES	YES	-1.632	4980.31	5722.92	0.87
DUSP16	627.483	YES	YES	-1.552	1181.97	1356.32	0.87
DYNLL2	694.781	YES	YES	-1.825	1534.72	1772.52	0.87
F11R	3195.04	YES	YES	-1.899	7111.89	8198.44	0.87
FARP1	1010.18	YES	YES	-1.601	1692.28	1950.76	0.87
FKBP8	1781.7	YES	YES	-1.686	3901.21	4509.73	0.87
GLB1	809.901	YES	YES	-1.778	1694.55	1938.95	0.87
GNAQ	688.54	YES	YES	-1.757	1398.98	1615.28	0.87
GOLPH3L	554.624	YES	YES	-1.642	1090.39	1254.67	0.87
KIAA0494	1346.07	YES	YES	-1.847	3176.88	3656.96	0.87
KIAA1191	1151.9	YES	YES	-1.855	2080.37	2392.81	0.87
KIDINS220	733.854	YES	YES	-1.717	1781.14	2036.68	0.87
LMBRD1	526.721	YES	YES	-1.783	1093.73	1262.07	0.87
MAPKAPK2	1081.98	YES	YES	-2.059	3379.65	3868.72	0.87
MEAF6	672.452	YES	YES	-1.812	1315.21	1511.81	0.87
PARN	583.078	YES	YES	-1.749	1097.1	1261.47	0.87
PBX2	736.703	YES	YES	-1.753	1355.18	1550.78	0.87
PDE4DIP	854.825	YES	YES	-1.745	1848.99	2120.3	0.87
PI4KB	628.042	YES	YES	-2.208	1801.88	2068.41	0.87
PIAS3	647.047	YES	YES	-1.638	1190.62	1367.61	0.87
PTK2	1224.3	YES	YES	-1.793	2396.39	2744.06	0.87
SLC35E1	623.801	YES	YES	-2.054	1666.76	1922.98	0.87
STX6	510.475	YES	YES	-2.143	1398.63	1615.61	0.87
TCEAL4	505.976	YES	YES	-1.828	1154.93	1327.49	0.87
TMEM109	777.938	YES	YES	-2.111	2234.47	2581.05	0.87
UBB	5070.67	YES	YES	-1.771	11745	13433	0.87
WBP1	584.133	YES	YES	-1.877	1202.5	1390.05	0.87
WDR13	700.301	YES	YES	-1.652	1316.54	1507.38	0.87
ABR	1168.81	YES	YES	-1.691	2022.15	2359.24	0.86
ANAPC16	946.736	YES	YES	-1.978	1850.33	2160.62	0.86
ARAF	495.329	YES	YES	-2.174	1348.46	1560.52	0.86
ARHGEF12	1632.13	YES	YES	-1.827	3578.69	4165.61	0.86
ATP6V0E1	2301.4	YES	YES	-1.663	3430.92	3979.05	0.86
C19orf63	1745.09	YES	YES	-1.782	3144.7	3676.15	0.86
C21orf33	558.286	YES	YES	-2.113	1330.54	1547.47	0.86
CTSZ	4589.37	YES	YES	-1.68	7009.86	8173.79	0.86
CUL7	686.725	YES	YES	-1.731	1199.05	1395.86	0.86
CYB5R3	2093.9	YES	YES	-1.88	4052.34	4704.04	0.86
EEF1A1	46899.3	YES	YES	-1.684	63243.1	73852.3	0.86
EEF1G	7342.63	YES	YES	-1.919	15230.8	17683.8	0.86
EGLN2	740.418	YES	YES	-1.881	1525.92	1775.1	0.86
FAM3A	499.625	YES	YES	-1.603	860.02	1000.8	0.86
FNBP1L	800.562	YES	YES	-1.758	1606.86	1863.15	0.86
JTB	1708.29	YES	YES	-1.859	2901.15	3376.31	0.86
LSS	597.982	YES	YES	-1.718	951.6	1106.88	0.86
MRPL38	521.291	YES	YES	-1.847	1009.65	1176.59	0.86
MYO1C	1712.67	YES	YES	-1.978	3817.6	4442.36	0.86
NCOR2	2306.08	YES	YES	-1.606	4304.98	4998.87	0.86
PDCD4	729.816	YES	YES	-1.699	1253.08	1454.14	0.86
PRPF6	1460.16	YES	YES	-1.894	2633.42	3052.16	0.86
RAB11FIP4	695.561	YES	YES	-1.557	783.45	908.69	0.86
RPL3	14534.5	YES	YES	-1.8	25440.7	29592.9	0.86
RPL30	7787.65	YES	YES	-1.616	12041.6	13963.6	0.86
RPS25	3515.24	YES	YES	-1.888	6734.8	7856.63	0.86
RPS6KA1	831.495	YES	YES	-1.947	1700.82	1987.28	0.86
SCAMP3	740.259	YES	YES	-2.174	1675.54	1959.34	0.86
SIPA1	548.7	YES	YES	-1.781	1066.59	1238.16	0.86
SRRM2	5696.69	YES	YES	-1.58	9310.19	10885.6	0.86
SUCLG2	771.847	YES	YES	-1.739	1206.44	1406.53	0.86
TAOK2	631.281	YES	YES	-1.874	1276.28	1484.27	0.86
TBC1D9B	1121.2	YES	YES	-2.047	2673.62	3115.64	0.86
TMEM87A	1079.61	YES	YES	-1.889	2000.18	2337.5	0.86
TMEM9B	578.701	YES	YES	-1.909	1270.25	1473.65	0.86
UBE2G2	537.628	YES	YES	-2.137	1286.46	1498.75	0.86
ACADVL	2092.35	YES	YES	-1.946	3847.78	4521.02	0.85
APRT	1167.6	YES	YES	-1.745	1628.96	1925.95	0.85
ASH1L	888.513	YES	YES	-1.763	1567.63	1834.22	0.85
ATL2	852.169	YES	YES	-1.962	1491.11	1762.35	0.85
BCAS4	747.261	YES	YES	-1.593	960.12	1127.66	0.85
CHID1	752.224	YES	YES	-2.157	1478.14	1747.83	0.85
CSNK1D	1107.37	YES	YES	-2.663	3653.66	4290.98	0.85
DDX42	963.171	YES	YES	-2.314	2641.75	3112.47	0.85
EEF1A1P9	3752.2	YES	YES	-1.878	5484.81	6465.27	0.85
FAM190B	633.746	YES	YES	-1.86	985.35	1153.93	0.85
FBXW5	1055.57	YES	YES	-1.738	1932.45	2274.75	0.85
HMOX2	555.611	YES	YES	-1.932	965.89	1132.01	0.85
KIAA1109	625.928	YES	YES	-1.74	1072.51	1268.91	0.85
LRPAP1	1749.66	YES	YES	-1.854	2593.78	3045.42	0.85
LYPLA2	839.516	YES	YES	-1.874	1647.91	1933.75	0.85
MAN2C1	497.191	YES	YES	-1.767	807.57	953.55	0.85
MKNK2	1633.95	YES	YES	-1.883	3009.79	3546.12	0.85
MRPL24	779.18	YES	YES	-1.752	1019.03	1198.42	0.85
NAGLU	528.493	YES	YES	-1.774	888.14	1040.8	0.85
NR1H2	571.873	YES	YES	-2.147	1460.94	1725.54	0.85
NXF1	495.995	YES	YES	-2.283	1361.58	1599.51	0.85
PEBP1	2176.54	YES	YES	-1.947	4103.96	4843.08	0.85
PIK3R1	504.588	YES	YES	-1.843	855.97	1011.74	0.85
PRKAR1A	2575.22	YES	YES	-2.245	6384.95	7481.26	0.85
RANBP9	524.176	YES	YES	-2.277	1188.5	1399.43	0.85
RBM47	1146.71	YES	YES	-2.006	2601.48	3046.03	0.85
RFX5	620.079	YES	YES	-2.14	1224.8	1447.41	0.85
RPL14	4163.27	YES	YES	-1.744	6017.38	7054.31	0.85
RPL32	7959.27	YES	YES	-1.792	11074.2	13092.2	0.85
RPRD2	649.76	YES	YES	-2.047	1417.57	1664.13	0.85
SCP2	1334.51	YES	YES	-2.219	2833.54	3329.66	0.85
SGSM3	613.191	YES	YES	-1.876	1123.26	1321.68	0.85
SMARCA2	881.905	YES	YES	-1.697	1334.46	1577.03	0.85
SMURF2	504.946	YES	YES	-1.732	745.62	875.38	0.85
ST7	513.91	YES	YES	-2.019	682.23	802.86	0.85
TCF25	969.672	YES	YES	-2.031	1875.73	2199.49	0.85
TCIRG1	1250.91	YES	YES	-1.625	1879.66	2209.14	0.85
TMBIM4	1514.37	YES	YES	-1.702	1459.79	1725.73	0.85
TMEM111	570.901	YES	YES	-2.085	982.54	1157.58	0.85
TMEM179B	560.264	YES	YES	-2.106	1094.43	1290.75	0.85
TMEM219	1159.82	YES	YES	-1.862	1993.04	2334.34	0.85
TMEM8A	1215.34	YES	YES	-1.857	2307.69	2721.09	0.85
TRAPPC1	684.673	YES	YES	-2.1	1353.03	1587.42	0.85
VAPA	2318.8	YES	YES	-1.876	3722.24	4372.79	0.85
YIPF2	558.671	YES	YES	-1.899	1121.29	1315.6	0.85
ARHGEF1	1164.03	YES	YES	-1.833	1986.49	2374	0.84
ATP9A	1285.95	YES	YES	-1.67	1711.99	2042.08	0.84
CAPN2	4493.47	YES	YES	-1.853	7980.2	9489.93	0.84
CDK5RAP3	1413.22	YES	YES	-1.815	1977.9	2358.23	0.84
CUX1	759.224	YES	YES	-2.226	1618.07	1921.85	0.84
DDRGK1	586.179	YES	YES	-1.941	942.09	1116.31	0.84
DSTN	5522.46	YES	YES	-1.826	7479.52	8880.33	0.84
EEF2	18702.7	YES	YES	-2.077	31574.8	37681.8	0.84
FAM129B	3440.2	YES	YES	-1.971	6030.99	7221.98	0.84
FPGS	538.78	YES	YES	-2.09	1060.24	1262.87	0.84
GIGYF1	790.631	YES	YES	-1.831	1055.61	1263.47	0.84
HGSNAT	1858.05	YES	YES	-1.781	2299.7	2745.01	0.84
KLHDC2	625.082	YES	YES	-1.989	940.77	1119.53	0.84
LMO7	4261.32	YES	YES	-1.587	3823.62	4563.69	0.84
MBNL1	1696.36	YES	YES	-2.169	3235.05	3851.01	0.84
MEF2D	750.564	YES	YES	-2.238	1634.57	1945.73	0.84
MRPS6	743.873	YES	YES	-1.751	752.41	891.6	0.84
NEU1	1525.85	YES	YES	-1.992	2231.03	2660.83	0.84
NR3C1	950.62	YES	YES	-1.917	1510.83	1804.69	0.84
NUMA1	2811.05	YES	YES	-1.94	5794.95	6910.42	0.84
PLXNB2	4572.95	YES	YES	-1.728	6789.86	8117.17	0.84
RAB34	965.992	YES	YES	-2.026	1776.21	2109.11	0.84
RALGDS	619.782	YES	YES	-2.291	1390.22	1656.23	0.84
RPLP1	12370.1	YES	YES	-1.866	18445.3	21850.2	0.84
RPLP2	5978.24	YES	YES	-1.881	9118.29	10861.8	0.84
RPS2	6078.14	YES	YES	-1.982	9972.99	11849.9	0.84
RPS20	7821.24	YES	YES	-2.038	13451.3	16079.3	0.84
SDC3	1405.52	YES	YES	-1.702	2039.12	2422.47	0.84
SECISBP2L	3047.11	YES	YES	-1.608	1154.3	1373.2	0.84
SH3RF1	565.127	YES	YES	-1.709	824.47	977.78	0.84
SPR	514.178	YES	YES	-1.798	745.41	888.4	0.84
STK40	552.647	YES	YES	-2.382	1350.4	1604.84	0.84
TGFB1	823.921	YES	YES	-1.679	1296.08	1546.25	0.84
TMEM41B	642.343	YES	YES	-2.096	1146.76	1367.79	0.84
TOM1	654.473	YES	YES	-2.283	1402.86	1678.65	0.84
TPCN1	828.015	YES	YES	-2.001	1300.95	1557.94	0.84
TYK2	536.038	YES	YES	-2.232	1233.73	1470.62	0.84
VKORC1	961.719	YES	YES	-2.125	1489.2	1777.44	0.84
ZBTB7B	686.826	YES	YES	-2.185	1434.19	1711.25	0.84
ALDH7A1	504.247	YES	YES	-1.924	813.91	980.67	0.83
ARAP1	1011.75	YES	YES	-2.502	2407.81	2912.94	0.83
ARRDC1	522.802	YES	YES	-2.102	944.92	1139.44	0.83
CD320	581.982	YES	YES	-1.715	611.45	733.24	0.83
CNOT8	1195.9	YES	YES	-2.166	1505.3	1807.89	0.83
CRYZ	756.323	YES	YES	-1.655	890.31	1073.53	0.83
CYB561	1460.44	YES	YES	-2.328	2862.74	3453.12	0.83
FAM89B	583.074	YES	YES	-2.108	1042.3	1255.62	0.83
FLJ45340	669.822	YES	YES	-1.638	768.39	927.87	0.83
IMPDH1	938.798	YES	YES	-1.815	1178.93	1415.12	0.83
IQSEC1	580.733	YES	YES	-2.165	1161.05	1396.91	0.83
IRF2BP2	1747.89	YES	YES	-2.629	4326.95	5195.5	0.83
ITFG3	977.116	YES	YES	-2.254	1942.59	2331.87	0.83
KIF1C	1221.03	YES	YES	-2.15	2185.72	2627.52	0.83
LMF2	750.483	YES	YES	-2.121	1400.93	1685.35	0.83
MTHFR	531.595	YES	YES	-1.935	785.25	940.78	0.83
NIPAL3	543.171	YES	YES	-1.993	824.97	997.03	0.83
PCMTD2	599.063	YES	YES	-2.36	1097.24	1316.98	0.83
PCYOX1	1461.15	YES	YES	-2.191	2237.61	2684.74	0.83
PDPK1	538.317	YES	YES	-2.391	1137.52	1377.52	0.83
PHF15	654.002	YES	YES	-1.881	1035.18	1243.05	0.83
PHKB	929.779	YES	YES	-2.163	1570.92	1888.33	0.83
POLR2C	1115.03	YES	YES	-2.125	1644.35	1980.79	0.83
PREPL	556.014	YES	YES	-2.538	1254.43	1514.97	0.83
RAB11B	691.995	YES	YES	-2.519	1772.7	2131.15	0.83
RAB25	1590.33	YES	YES	-1.643	2190.21	2654.6	0.83
RBM5	668.989	YES	YES	-2.406	1405.56	1702.06	0.83
RBMS2	593.621	YES	YES	-2.244	1148.93	1385.62	0.83
RPL10	9442.35	YES	YES	-2.22	13642.5	16526	0.83
RPL11	6767.99	YES	YES	-2.4	11909.9	14396.3	0.83
RPS14	10087.4	YES	YES	-1.837	10839	13104.4	0.83
RPS15	2120.95	YES	YES	-1.947	3087.67	3737.73	0.83
RUNX1	1119.76	YES	YES	-2.322	2483.67	3010.01	0.83
SCAND1	511.487	YES	YES	-1.762	701.21	842	0.83
SMARCA1	1094.39	YES	YES	-1.608	1198.18	1439.07	0.83
SPRED1	1028.17	YES	YES	-1.835	1371.48	1648.48	0.83
STK17B	1002.82	YES	YES	-2.073	1614.92	1941.94	0.83
SUMF2	4040.31	YES	YES	-2.034	3631.58	4395.91	0.83
SVIL	995.136	YES	YES	-1.909	1513.26	1831.92	0.83
SYNGR2	4134.19	YES	YES	-1.945	6300.09	7566.2	0.83
TAGLN2	12626.1	YES	YES	-1.923	20680.9	24900.4	0.83
TRIB1	1647.22	YES	YES	-1.909	1970.3	2378	0.83
UNC93B1	1055.79	YES	YES	-1.792	1347.59	1615.32	0.83
UQCR10	967.851	YES	YES	-2.056	1334.62	1599.02	0.83
UXS1	646.96	YES	YES	-2.501	1275.07	1539.13	0.83
VPS28	975.203	YES	YES	-2.042	1569.15	1880.89	0.83
WNK1	3106.42	YES	YES	-1.905	4449.43	5370.55	0.83
ADCY7	1119.22	YES	YES	-1.747	1026.27	1252.34	0.82
AGAP3	653.903	YES	YES	-2.551	1376.72	1687.71	0.82
AHR	4117.33	YES	YES	-1.606	3529.62	4292.18	0.82
ARSA	639.233	YES	YES	-1.873	898.48	1100.55	0.82
ATP1A1	12315.5	YES	YES	-2.065	15705	19175.9	0.82
C12orf62	539.375	YES	YES	-2.203	673.08	821.03	0.82
C8orf83	517.726	YES	YES	-2.305	819.74	1005.02	0.82
CALCOCO1	747.342	YES	YES	-2.182	1219.39	1480.64	0.82
CCDC47	1360.37	YES	YES	-2.79	3054.01	3725.22	0.82
CCDC56	1048.94	YES	YES	-2.011	1091.2	1334.21	0.82
CCDC69	690.42	YES	YES	-1.615	705.64	861.29	0.82
CDH5	704.388	YES	YES	-1.756	683.21	830.97	0.82
CDK10	498.844	YES	YES	-2.04	712.45	874.16	0.82
CLDN7	1779.05	YES	YES	-2.104	2732.02	3344.38	0.82
CLN3	614.167	YES	YES	-2.527	1111.95	1363.52	0.82
CORO1A	1179.64	YES	YES	-1.584	1333.44	1618.81	0.82
DCAF12	877.674	YES	YES	-2.53	1696.77	2079.1	0.82
DENND3	516.669	YES	YES	-1.956	657.58	799	0.82
EEF1D	5040.72	YES	YES	-2.234	6991.79	8564.8	0.82
FAM195B	754.109	YES	YES	-1.934	1094.85	1337.41	0.82
GAA	2100.19	YES	YES	-1.86	2967.55	3621.5	0.82
GADD45B	1032.59	YES	YES	-1.766	834.08	1022.77	0.82
GUSB	1217.19	YES	YES	-2.405	2124.35	2597.85	0.82
HADH	583.744	YES	YES	-2.352	909.18	1113.22	0.82
KCTD12	1591.74	YES	YES	-1.675	1955.71	2390.62	0.82
KLF9	688.999	YES	YES	-1.877	859.46	1043.89	0.82
KRTCAP2	1388.87	YES	YES	-2.184	1970.32	2403.41	0.82
LMNA	4329.38	YES	YES	-2.054	7325.37	8911.23	0.82
MAN2B1	1358.49	YES	YES	-2.472	2853.07	3492.46	0.82
MAPK9	602.168	YES	YES	-2.545	975.19	1191.79	0.82
METTL7A	1193.02	YES	YES	-1.564	1101.81	1349.32	0.82
MPST	837.897	YES	YES	-1.973	1070.3	1303.57	0.82
NKTR	855	YES	YES	-1.844	1104.6	1352.95	0.82
PIK3IP1	631.036	YES	YES	-1.947	960.93	1174.37	0.82
PRKCD	712.415	YES	YES	-2.501	1415.05	1734.92	0.82
REEP5	1330.6	YES	YES	-2.639	2956.03	3591.03	0.82
RHBDD2	948.511	YES	YES	-2.493	2136.52	2592.54	0.82
RPL10A	6892.75	YES	YES	-2.158	8499.12	10379	0.82
RPL12	6944.66	YES	YES	-2.072	8147.94	9994.03	0.82
RPL36	3901.63	YES	YES	-1.934	5158.62	6264.77	0.82
RPS4X	14177.2	YES	YES	-2.161	21616.1	26374.4	0.82
RPS9	8995.48	YES	YES	-2.045	11661.5	14189.1	0.82
SEPN1	1401.43	YES	YES	-2.733	3075.2	3768.02	0.82
SHARPIN	812.508	YES	YES	-2.116	1202.04	1473.34	0.82
SLC29A1	903.598	YES	YES	-2.157	1437.78	1749.53	0.82
SSR4	4427.79	YES	YES	-1.821	4903.97	5950.38	0.82
SWAP70	755.379	YES	YES	-2.486	1497.51	1826.96	0.82
TEAD2	706.46	YES	YES	-1.666	877.62	1066.43	0.82
TMEM205	602.208	YES	YES	-2.335	1174.32	1425.13	0.82
TOMM7	1040.89	YES	YES	-2.298	1585.63	1927.58	0.82
TRIM8	1582.67	YES	YES	-2.281	2697.25	3303.26	0.82
TTC3	1466.96	YES	YES	-2.5	3001.69	3645.34	0.82
UBA7	578.596	YES	YES	-1.818	860.53	1047.12	0.82
UBAP1	931.235	YES	YES	-2.441	1795.25	2180.58	0.82
UBL3	683.512	YES	YES	-2.303	1237.64	1510.45	0.82
VEGFB	578.333	YES	YES	-2.826	1394.47	1703.15	0.82
VWA5A	569.967	YES	YES	-1.576	685.11	836.29	0.82
ACO1	989.294	YES	YES	-2.214	1223.92	1513.23	0.81
ACP5	2229.05	YES	YES	-1.785	1791.99	2221.18	0.81
AKAP1	959.506	YES	YES	-2.601	1703.3	2110.79	0.81
ANKRD50	581.255	YES	YES	-2.147	827.76	1020.23	0.81
BCKDHA	521.543	YES	YES	-2.496	928.22	1150.85	0.81
CD151	3987.16	YES	YES	-2.148	5907.45	7299.07	0.81
DUS1L	995.704	YES	YES	-2.37	1639.76	2023.7	0.81
ERBB2	20354.5	YES	YES	-1.698	5299.18	6560.93	0.81
ERGIC1	3239.69	YES	YES	-2.362	4569.6	5625.15	0.81
FAM46A	1092.66	YES	YES	-1.71	862.6	1071.32	0.81
FKBP2	881.137	YES	YES	-2.196	1067.05	1322.12	0.81
GNB2L1	10534.5	YES	YES	-2.464	16766.9	20798.5	0.81
HPCAL1	921.349	YES	YES	-2.1	1282.81	1575.25	0.81
HSPB1	6355.6	YES	YES	-1.712	7008.24	8609.85	0.81
IL1R1	1879.75	YES	YES	-1.762	2328.47	2864.34	0.81
KIAA0467	547.884	YES	YES	-2.17	807.82	996.55	0.81
KIFC3	639.964	YES	YES	-1.896	904.79	1119.56	0.81
KITLG	1534.94	YES	YES	-1.568	1526.82	1876.34	0.81
MAL2	5966.64	YES	YES	-2.119	7427.01	9191.12	0.81
MAN1A1	1004.68	YES	YES	-1.614	737.51	905.81	0.81
MFSD10	979.224	YES	YES	-2.228	1550.01	1924.42	0.81
MKL2	582.722	YES	YES	-2.493	1040.99	1286.85	0.81
MTMR3	695.186	YES	YES	-2.437	1226.78	1509.35	0.81
OSBPL5	575.564	YES	YES	-1.592	440.22	545.66	0.81
PCBD1	745.542	YES	YES	-2.515	1212.01	1500.76	0.81
PNPLA2	771.563	YES	YES	-2.189	1192.8	1473.06	0.81
RALGAPA1	500.639	YES	YES	-2.016	368.1	452.33	0.81
RBL2	846.017	YES	YES	-2.62	1695.9	2094.69	0.81
RNF19A	1493.18	YES	YES	-2.187	1682.21	2086.2	0.81
RRBP1	4137.21	YES	YES	-2.053	6020.42	7445.29	0.81
SCPEP1	2780.39	YES	YES	-1.894	2627.96	3233.48	0.81
SNTA1	768.666	YES	YES	-1.833	388.86	482.7	0.81
SPAG9	1327.69	YES	YES	-2.374	2006.74	2482.62	0.81
SSH3	550.699	YES	YES	-2.289	944.87	1168.34	0.81
STEAP3	1538.97	YES	YES	-1.596	1332.15	1638.6	0.81
STS	719.174	YES	YES	-1.692	644	796.02	0.81
TSPAN3	5974.36	YES	YES	-2.128	6199.28	7613.46	0.81
VIM	12366.4	YES	YES	-1.967	14173	17447.5	0.81
WWP2	670.275	YES	YES	-2.681	1261.7	1561.04	0.81
YAP1	1296.86	YES	YES	-2.424	2518.32	3115.65	0.81
ZFAND5	2060.25	YES	YES	-2.723	3682.12	4553.91	0.81
ZNF710	1126.87	YES	YES	-1.58	466.2	573.48	0.81
ACSL1	1403.91	YES	YES	-2.188	1908.82	2392.13	0.8
ADI1	1932.2	YES	YES	-2.358	1972.53	2462.07	0.8
AKAP13	2324.82	YES	YES	-2.182	3037.93	3806.63	0.8
ANKHD1	845.464	YES	YES	-2.849	1595.43	2004.59	0.8
ATP6V0A1	598.313	YES	YES	-2.752	1191.25	1491.91	0.8
BRPF3	669.519	YES	YES	-2.609	1175.6	1469.89	0.8
BSCL2	1014.23	YES	YES	-2.681	1654.16	2072.99	0.8
CAMK2D	818.105	YES	YES	-2.325	1077.45	1354.33	0.8
CRTAP	1274.28	YES	YES	-2.906	2628.27	3298.17	0.8
DOCK8	733.258	YES	YES	-1.79	754.7	946.3	0.8
ECHDC1	680.309	YES	YES	-2.372	1036.1	1295.7	0.8
ESRP2	856.131	YES	YES	-2.332	1368.52	1704.03	0.8
FAM84B	1665.98	YES	YES	-2.088	1650.17	2069.69	0.8
HAUS4	700.274	YES	YES	-2.499	1001	1251.61	0.8
IMPA2	1286.97	YES	YES	-1.66	1210.15	1508.44	0.8
INPPL1	1443.58	YES	YES	-2.563	2424.12	3021.54	0.8
ITPR3	3742.29	YES	YES	-1.746	4230.36	5275.44	0.8
KIF13A	514.848	YES	YES	-2.196	728.52	912.75	0.8
LLGL2	1365.43	YES	YES	-2.127	1965.29	2469.29	0.8
MLLT1	626.784	YES	YES	-2.861	1245.59	1566.63	0.8
MSN	6400.56	YES	YES	-2.149	10664.4	13309.1	0.8
MTRR	736.917	YES	YES	-2.3	752.41	944.2	0.8
MYO5C	884.998	YES	YES	-1.85	933.73	1167.16	0.8
NDUFA2	726.666	YES	YES	-2.398	804.33	1008.06	0.8
NME4	1081.21	YES	YES	-2.106	1344.17	1671.68	0.8
PELI1	928.997	YES	YES	-2.208	1094.67	1366.44	0.8
PHLDB1	656.849	YES	YES	-2.575	1174.45	1476.63	0.8
PNKD	1653.72	YES	YES	-2.358	2238.6	2813.71	0.8
PTPRM	688.9	YES	YES	-1.849	684.48	850.31	0.8
RAG1AP1	1678.01	YES	YES	-2.098	1675.99	2106.29	0.8
ROBLD3	558.718	YES	YES	-2.539	868.47	1080.38	0.8
RPL15	8185.08	YES	YES	-2.558	12338.6	15350.7	0.8
SC5DL	2206.13	YES	YES	-1.815	1497.83	1873.75	0.8
SKI	837.104	YES	YES	-2.642	1714	2134.72	0.8
SLC2A4RG	832.516	YES	YES	-2.262	1145.92	1433.05	0.8
SYVN1	841.643	YES	YES	-2.935	1880.05	2338.63	0.8
TBC1D2	1040.18	YES	YES	-1.769	766.92	957.54	0.8
TMEM129	509.531	YES	YES	-2.498	885.73	1114	0.8
TMEM43	1092.14	YES	YES	-2.807	2330.74	2905.09	0.8
TSPAN31	1620.35	YES	YES	-2.121	1023.58	1274.25	0.8
ACSS2	1081.82	YES	YES	-2.342	1185.47	1500.74	0.79
C7orf27	563.897	YES	YES	-2.423	916.8	1154.58	0.79
CD34	547.774	YES	YES	-2.348	710.14	902.65	0.79
CD37	670.991	YES	YES	-1.664	508.42	643.41	0.79
CD46	4688.93	YES	YES	-2.828	8081.98	10235.5	0.79
CNIH4	793.743	YES	YES	-2.714	1126.29	1430.86	0.79
CUTA	881.385	YES	YES	-3.036	1778	2243.67	0.79
CYB5R1	1011.1	YES	YES	-2.658	1400.34	1780.72	0.79
DGCR2	1354.75	YES	YES	-2.885	2808.24	3544.9	0.79
ELMO3	502.504	YES	YES	-1.969	621.49	785.95	0.79
ENC1	1608.93	YES	YES	-1.971	1594.04	2008.29	0.79
GALNT10	1628.06	YES	YES	-1.906	1537.93	1944.55	0.79
GPAA1	1319.82	YES	YES	-2.507	2153.69	2716.27	0.79
GSDMD	978.244	YES	YES	-2.215	1380.04	1737.29	0.79
HOOK3	1035.48	YES	YES	-2.465	1265.51	1598.58	0.79
HSD17B4	1021.19	YES	YES	-2.793	1802.78	2270.67	0.79
IKBKB	927.625	YES	YES	-2.415	1167.94	1478.93	0.79
ITGB2	3458.49	YES	YES	-1.594	2841.01	3598.5	0.79
KIAA0182	1430.95	YES	YES	-2.349	1834.49	2314.73	0.79
KRTCAP3	689.526	YES	YES	-1.625	567.68	715.64	0.79
LDB1	514.682	YES	YES	-3.286	1065.05	1354.38	0.79
LTBP4	1548.68	YES	YES	-1.832	1284.53	1624.33	0.79
MAP3K6	524.476	YES	YES	-2.348	707.13	896.32	0.79
MAPKAPK3	774.092	YES	YES	-2.482	1100.61	1388.67	0.79
MPRIP	1188.04	YES	YES	-2.796	1678.98	2135.21	0.79
MRPL14	1153.27	YES	YES	-2.359	1213.38	1533.41	0.79
MTSS1L	849.074	YES	YES	-2.114	999.77	1272.3	0.79
NFKBIA	2935.75	YES	YES	-2.288	3386.3	4301.74	0.79
OGT	2446.85	YES	YES	-2.308	2622.6	3321.68	0.79
PEX6	578.092	YES	YES	-2.129	575.96	728.17	0.79
PLXNB1	973.562	YES	YES	-2.091	1174.35	1487.64	0.79
PMF1	640.906	YES	YES	-2.758	976.52	1236.36	0.79
PPP1R16A	567.253	YES	YES	-2.119	696.77	880.36	0.79
PYCR2	661.836	YES	YES	-3.333	1485.12	1882.44	0.79
RAB11FIP1	3440.99	YES	YES	-2.146	3737.75	4750.13	0.79
RAI1	653.462	YES	YES	-2.384	1016.89	1290.64	0.79
RASSF5	534.096	YES	YES	-2.338	813.68	1035.22	0.79
RNF130	775.562	YES	YES	-3.079	1516.83	1932.09	0.79
SCAMP4	648.06	YES	YES	-3.095	1470.1	1849.73	0.79
SLC12A9	574.157	YES	YES	-2.668	908.15	1154.03	0.79
SPRY1	585.41	YES	YES	-2.18	677.77	855.22	0.79
SRD5A3	1522.95	YES	YES	-1.793	1064.55	1346.99	0.79
STUB1	634.565	YES	YES	-2.954	1324.32	1672.77	0.79
SYNPO	1646.12	YES	YES	-2.078	1860.37	2362.41	0.79
USP54	746.884	YES	YES	-2.213	974.92	1236.26	0.79
YIPF3	1295.78	YES	YES	-3.334	2816.5	3554.05	0.79
ADCY6	512.775	YES	YES	-2.711	916.14	1168.49	0.78
AP2A2	692.672	YES	YES	-3.5	1617.49	2066.73	0.78
ASPSCR1	627.786	YES	YES	-2.185	515.1	657.65	0.78
C14orf4	827.545	YES	YES	-2.69	1159.1	1490.99	0.78
C20orf108	889.235	YES	YES	-2.883	1458.61	1871.61	0.78
C6orf48	1255.07	YES	YES	-2.695	1480.99	1901.66	0.78
C9orf5	1251.25	YES	YES	-2.778	1772.68	2262.74	0.78
CLCN7	969.016	YES	YES	-2.948	1713.99	2210.86	0.78
DCAF8	662.261	YES	YES	-3.826	1689.73	2169.96	0.78
DPYD	715.562	YES	YES	-1.88	743.48	955.81	0.78
EPAS1	4628.95	YES	YES	-2.359	5522.28	7072.99	0.78
FOXP4	1901.39	YES	YES	-2.436	1816.04	2320.04	0.78
GGA2	821.435	YES	YES	-3.621	1912.26	2456.95	0.78
GUCY1A3	683.251	YES	YES	-2.237	762.55	981.07	0.78
HCFC1R1	529.93	YES	YES	-2.533	668.19	854.23	0.78
INPP5B	531.066	YES	YES	-2.589	454.85	581.26	0.78
KDM6B	509.198	YES	YES	-2.639	876.4	1118.51	0.78
LGALS3BP	14696.9	YES	YES	-2.083	19471.8	24964.5	0.78
LRP6	505.058	YES	YES	-2.583	744.25	958.85	0.78
MS4A7	628.223	YES	YES	-1.806	452.15	580.62	0.78
NEURL1B	1066.14	YES	YES	-1.674	698.68	895.2	0.78
PON2	2452.58	YES	YES	-2.26	2644.41	3407.11	0.78
RAPH1	1192.93	YES	YES	-2.558	1606.73	2057.35	0.78
RHOT2	628.838	YES	YES	-2.632	1127.79	1437.23	0.78
RPL13	10076	YES	YES	-2.542	13152.4	16769.8	0.78
RPL29	5981.94	YES	YES	-2.488	6942.47	8909.56	0.78
RXRA	824.629	YES	YES	-2.739	1391.38	1773.91	0.78
SH3BGRL2	1004.05	YES	YES	-1.782	926.49	1184.49	0.78
SLC22A23	1128.92	YES	YES	-1.748	983.39	1258.81	0.78
TEX264	499.781	YES	YES	-3.136	914.03	1170.6	0.78
TGFBR2	2096.78	YES	YES	-2.458	2895.34	3721.97	0.78
TKT	6736.37	YES	YES	-2.575	8665.86	11107.1	0.78
TMC6	1248.31	YES	YES	-2.531	1704.68	2175.82	0.78
TSPAN12	555.09	YES	YES	-2.029	648.02	826.99	0.78
TSPAN13	3065.16	YES	YES	-2.455	3789.93	4844.26	0.78
TXNDC17	1157.98	YES	YES	-2.099	1128.05	1442.32	0.78
VAMP8	2899.1	YES	YES	-2.556	3393.02	4343.33	0.78
WDR6	1127.47	YES	YES	-3.105	2365.19	3014.46	0.78
XPR1	2862.04	YES	YES	-2.091	2496.12	3195.67	0.78
ACSF2	726.131	YES	YES	-2.201	695.22	901.77	0.77
AKNA	629.079	YES	YES	-2.548	836.57	1090.96	0.77
C7orf50	810.576	YES	YES	-2.619	1104.96	1443.6	0.77
CABIN1	833.902	YES	YES	-2.952	1349.23	1749.05	0.77
CAT	1138.16	YES	YES	-2.653	1516.19	1965.56	0.77
CCND1	5775.44	YES	YES	-1.817	4101.08	5316.27	0.77
CTDSPL	635.673	YES	YES	-2.898	893.24	1167.22	0.77
CTNNBIP1	700.917	YES	YES	-2.773	900.1	1162.42	0.77
ERBB3	3202.31	YES	YES	-2.237	3746.46	4851.4	0.77
ETV1	839.01	YES	YES	-1.777	516.25	674.48	0.77
FCHO2	722.643	YES	YES	-2.732	952.13	1242.56	0.77
GGT5	770.195	YES	YES	-2.022	603.87	785.58	0.77
IRF7	727.504	YES	YES	-2.242	731.44	945.67	0.77
JMJD8	707.149	YES	YES	-3.109	1278.12	1652.71	0.77
LASS2	2982.3	YES	YES	-3.055	4963.93	6419.86	0.77
MYH10	1810.6	YES	YES	-2.238	1540.66	2008.42	0.77
NENF	884.531	YES	YES	-2.753	1026.3	1327.1	0.77
PARP10	997.66	YES	YES	-2.358	1264.19	1647.72	0.77
PDGFA	511.323	YES	YES	-1.958	382.83	498.09	0.77
POLR2L	990.316	YES	YES	-2.819	1419.59	1849.91	0.77
POR	1798.53	YES	YES	-2.821	2431.97	3152.59	0.77
PTPRS	616.727	YES	YES	-2.05	679.28	879.37	0.77
RASSF8	598.839	YES	YES	-1.851	295.51	381.59	0.77
RGS3	591.933	YES	YES	-3.045	1066.4	1383.84	0.77
SDC4	6917.4	YES	YES	-2.453	8173.38	10597	0.77
SH3YL1	636.274	YES	YES	-2.714	920.13	1194.27	0.77
SHC2	519.598	YES	YES	-1.578	254.15	329.29	0.77
SLC11A2	954.877	YES	YES	-3.154	1415.77	1833.4	0.77
SREBF1	1532.12	YES	YES	-2.537	1762.4	2282.07	0.77
TBCD	923.631	YES	YES	-3.266	1717.47	2233.97	0.77
TMEM9	1912.99	YES	YES	-2.736	2370.23	3066.04	0.77
TNKS1BP1	1889.29	YES	YES	-2.88	3244.33	4227.21	0.77
TRIM24	573.031	YES	YES	-2.834	769.47	994.76	0.77
UTRN	1324.9	YES	YES	-2.512	1671.12	2165.96	0.77
ZFP36L1	5829.06	YES	YES	-2.614	7126.62	9314.27	0.77
ACAA1	553.412	YES	YES	-3.193	881.14	1153.58	0.76
ADAM15	2459.27	YES	YES	-2.699	3464.4	4528.66	0.76
AHDC1	534.424	YES	YES	-2.632	683.21	899.36	0.76
ANK3	839.926	YES	YES	-1.873	533.46	701.21	0.76
BLVRA	748.384	YES	YES	-2.923	1132.68	1488.5	0.76
BTG2	3330.88	YES	YES	-1.973	2197.96	2901.41	0.76
C13orf15	637.772	YES	YES	-2.336	648.75	849.63	0.76
C17orf28	1079.29	YES	YES	-2.381	1282.65	1680.94	0.76
CCNL2	1711.72	YES	YES	-2.327	1761.97	2317.86	0.76
CSRNP1	771.689	YES	YES	-2.641	730.76	967.76	0.76
EHD2	1995.94	YES	YES	-2.327	2295.9	3023.98	0.76
FMO2	641.338	YES	YES	-1.679	390.27	515.76	0.76
GLTSCR2	2117.57	YES	YES	-3.045	3308.87	4348.7	0.76
GPX4	2074.85	YES	YES	-2.987	3028.79	3987.13	0.76
ID4	510.676	YES	YES	-1.632	205.85	270.32	0.76
IL6ST	881.684	YES	YES	-1.825	698.95	918.32	0.76
LAPTM4B	6904.01	YES	YES	-2.24	5312.86	6960.8	0.76
NOTCH1	598.963	YES	YES	-2.596	828.23	1092.88	0.76
PPAP2A	1001.04	YES	YES	-2.453	575.62	755.36	0.76
PRDX5	2946.9	YES	YES	-2.91	3930.36	5160.7	0.76
RAB20	1529.01	YES	YES	-2.753	595.11	782.61	0.76
RAB27A	682.676	YES	YES	-2.781	917.68	1211.7	0.76
RNH1	1203.85	YES	YES	-3.545	2721.85	3603.3	0.76
SCNN1A	7173.9	YES	YES	-1.881	4367.11	5752.44	0.76
SLC22A18	549.15	YES	YES	-2.1	419.68	555.03	0.76
SLC39A4	990.807	YES	YES	-2.118	682.59	896.18	0.76
SNRPN	1176.63	YES	YES	-2.187	1353.16	1774.67	0.76
ST5	844.83	YES	YES	-3.046	1318.99	1733.55	0.76
VAMP5	1384.75	YES	YES	-1.832	641.68	838.99	0.76
ABCA2	582.634	YES	YES	-2.565	746.85	995.59	0.75
AGA	792.35	YES	YES	-2.689	544.31	721.32	0.75
AOC3	1064.12	YES	YES	-1.924	808.04	1077.28	0.75
ARHGEF2	1224.41	YES	YES	-3.204	1760.34	2343.1	0.75
C8orf55	725.282	YES	YES	-2.646	679.53	900.21	0.75
CABLES1	663.924	YES	YES	-2.178	497.86	663.32	0.75
COL8A1	1108.82	YES	YES	-1.754	582.26	775.98	0.75
CTSO	557.591	YES	YES	-2.935	839.34	1123.37	0.75
DGAT1	699.87	YES	YES	-2.914	843.79	1127.32	0.75
DHCR24	9184.76	YES	YES	-2.749	10436.6	13976	0.75
EGR1	5836.03	YES	YES	-1.799	2676.38	3559.69	0.75
ELF3	4306.12	YES	YES	-2.631	5665.09	7557.45	0.75
EPS8L2	1335.14	YES	YES	-2.706	1797.71	2400.26	0.75
ETV5	624.016	YES	YES	-2.461	698.2	935.5	0.75
F13A1	2765.22	YES	YES	-1.576	633.78	845.13	0.75
FZD1	810.107	YES	YES	-2.655	758.48	1014.66	0.75
GAS5	2566.95	YES	YES	-2.31	1624.82	2162.53	0.75
GAS6	1332.54	YES	YES	-2.368	1358.22	1815.4	0.75
GDE1	1455.81	YES	YES	-3.494	2364.7	3153.51	0.75
GNPTG	668.527	YES	YES	-3.393	1034.84	1384.14	0.75
KIAA0319L	1288.84	YES	YES	-3.469	2348.34	3111.14	0.75
LOC146880	558.265	YES	YES	-2.378	432.43	578.53	0.75
LTBP2	4530.93	YES	YES	-2.059	3201.15	4255.18	0.75
NFIB	931.217	YES	YES	-2.82	1217.45	1625.16	0.75
NRP1	2423.8	YES	YES	-2.582	2734.71	3661.53	0.75
PGAP3	2586.1	YES	YES	-2.599	969.45	1284.6	0.75
PKD1	703.531	YES	YES	-2.632	950.26	1261.07	0.75
PLA2G16	1560.68	YES	YES	-2.03	793.86	1064.47	0.75
PLXND1	2876.36	YES	YES	-2.582	2987.06	3957.28	0.75
PMVK	559.776	YES	YES	-3.453	833.62	1116.27	0.75
PPL	1999.05	YES	YES	-2.217	2030.63	2716.66	0.75
SMARCA4	1739.47	YES	YES	-2.614	2465.25	3274.58	0.75
SPATA20	733.223	YES	YES	-3.058	1061.39	1417.26	0.75
STOM	3219.96	YES	YES	-2.839	4370.21	5850.79	0.75
TNRC18	2097.74	YES	YES	-2.841	2829.71	3784.82	0.75
TP53INP1	1026.98	YES	YES	-2.835	1217.08	1632.69	0.75
TREM2	714.406	YES	YES	-1.803	331.32	438.98	0.75
VKORC1L1	890.066	YES	YES	-3.605	1537.93	2049.55	0.75
WWC3	741.365	YES	YES	-2.952	1181.76	1570.88	0.75
ASS1	2938.8	YES	YES	-1.889	1863.07	2512.78	0.74
ATP6V1C2	532.273	YES	YES	-1.815	129.63	174.15	0.74
C11orf2	652.344	YES	YES	-3.958	1420	1915.02	0.74
CLDN4	5437.43	YES	YES	-2.66	6962.75	9365.53	0.74
CST3	8128.91	YES	YES	-2.651	5182.86	7025.02	0.74
EFEMP1	2312.26	YES	YES	-2.134	1570.24	2119.96	0.74
FAM8A1	609.473	YES	YES	-3.749	978.69	1324.72	0.74
FASN	10130.5	YES	YES	-2.045	4138.48	5579.82	0.74
FHL1	892.669	YES	YES	-1.832	410.02	551.26	0.74
FYCO1	594.277	YES	YES	-3.434	993.85	1351.38	0.74
GNG11	978.197	YES	YES	-2.05	424.28	570.06	0.74
ITPR1	701.545	YES	YES	-2.411	544.14	733.67	0.74
JUND	1395.42	YES	YES	-3.134	1759.51	2372.47	0.74
LDOC1	695.617	YES	YES	-1.75	444.2	599.77	0.74
LOC100129034	1010.08	YES	YES	-3.133	1688.01	2275.55	0.74
MVP	4516.57	YES	YES	-2.77	5864.57	7877.89	0.74
NOS3	2801.83	YES	YES	-1.763	249.21	335.71	0.74
PHPT1	1028.75	YES	YES	-2.873	1008.39	1355.88	0.74
POLR3H	1953.08	YES	YES	-2.814	846.25	1150.1	0.74
PPP1R12B	1226.77	YES	YES	-2.366	887.48	1193.69	0.74
QSOX1	6134.28	YES	YES	-2.677	6605.82	8881.81	0.74
RGL2	994.469	YES	YES	-3.364	1367.08	1842.68	0.74
SEPW1	3515.13	YES	YES	-2.771	3656.24	4924.22	0.74
SIL1	781.044	YES	YES	-3.322	948.31	1273.05	0.74
SLC39A8	1971.89	YES	YES	-2.376	1666.73	2244.27	0.74
SNX21	801.776	YES	YES	-2.502	489.39	659.98	0.74
SPRED2	622.595	YES	YES	-3.431	1023.48	1376.84	0.74
TMEM50B	716.982	YES	YES	-3.415	1020.4	1372.12	0.74
TMEM98	1096.47	YES	YES	-2.401	1097.05	1478.12	0.74
TP53I11	1563.71	YES	YES	-2.87	2210.53	2972.21	0.74
TSC2	701.39	YES	YES	-3.845	1421.52	1919.22	0.74
TUBGCP6	542.803	YES	YES	-2.82	662.04	893.28	0.74
TXNIP	10137.4	YES	YES	-2.428	10061.4	13546.5	0.74
WNT5A	501.246	YES	YES	-2.047	397.14	533.26	0.74
ZFP36	5344.7	YES	YES	-2.154	3042.11	4084.66	0.74
ZNF512B	715.672	YES	YES	-2.89	774.68	1048.91	0.74
ALDH3A2	3750.21	YES	YES	-2.379	2482.61	3383.38	0.73
ATP8B2	535.735	YES	YES	-2.834	624.66	859.48	0.73
BMF	697.756	YES	YES	-3.017	756.32	1040.22	0.73
CAPN12	577.057	YES	YES	-2.075	305.58	417.43	0.73
CD81	5035.91	YES	YES	-3.628	8613.42	11793.4	0.73
CDK2AP2	1778.35	YES	YES	-2.892	1554.08	2115.62	0.73
CELSR1	1882.05	YES	YES	-2.664	2049.47	2800.65	0.73
CFI	1585.35	YES	YES	-2.286	954.63	1315.74	0.73
CHKA	554.496	YES	YES	-3.017	589.39	804.21	0.73
COL18A1	3054.26	YES	YES	-2.457	2983.18	4106.32	0.73
CRIP1	2990.5	YES	YES	-2.207	1754.31	2409.22	0.73
CRLS1	958.317	YES	YES	-3.418	1095.94	1497.34	0.73
DPM2	619.946	YES	YES	-3.826	845.24	1163.49	0.73
EDEM1	1570.9	YES	YES	-3.276	1983.96	2699.94	0.73
FOLR2	671.749	YES	YES	-1.901	261.76	358.77	0.73
FUCA1	1700.74	YES	YES	-3.048	1987	2707.34	0.73
FUT3	738.117	YES	YES	-1.79	406.53	554.04	0.73
HLA-DMB	2413.93	YES	YES	-2.139	1734.32	2370.32	0.73
HLA-DQA2	1571.21	YES	YES	-1.673	532.6	733.71	0.73
ITGBL1	823.438	YES	YES	-2.078	517.2	712.89	0.73
IVD	1053.62	YES	YES	-3.052	1115.38	1538.42	0.73
KANK2	773.012	YES	YES	-3.78	1309.72	1796.4	0.73
LAMB2	1737.55	YES	YES	-3.394	2635.23	3611.42	0.73
NPEPL1	608.561	YES	YES	-3.001	590.48	810.64	0.73
PACSIN3	521.046	YES	YES	-2.596	493.39	679.3	0.73
PPDPF	3683.17	YES	YES	-2.771	3173.66	4340.26	0.73
PRELP	1581.91	YES	YES	-2.064	1025.43	1411.25	0.73
PVRL4	970.497	YES	YES	-2.177	930.22	1279.57	0.73
RNF145	3555.4	YES	YES	-2.74	3166.94	4346.48	0.73
RPS6KA3	1374.47	YES	YES	-3.558	1960.54	2691.55	0.73
RRM2B	770.13	YES	YES	-3.307	953.52	1305.04	0.73
SFRP4	1716.73	YES	YES	-1.558	707.27	969.48	0.73
TMEM159	905.9	YES	YES	-2.69	940.63	1295.38	0.73
TXNDC11	1208.29	YES	YES	-3.762	1876.98	2575.16	0.73
VASN	870.971	YES	YES	-2.276	541.83	745.03	0.73
ZNF323	576.761	YES	YES	-2.111	261.46	356.56	0.73
ABCA7	565.333	YES	YES	-2.639	463.57	643.98	0.72
AIF1L	1158.67	YES	YES	-2.13	365.88	507.89	0.72
ALDH2	4675.8	YES	YES	-2.713	4003.67	5597.63	0.72
ANPEP	7287.12	YES	YES	-1.619	418.58	579.88	0.72
ARHGAP31	529.332	YES	YES	-2.618	505.39	702.46	0.72
ARMC9	604.258	YES	YES	-2.906	286.44	398.42	0.72
ASAH1	4606.05	YES	YES	-3.206	5408.59	7504.36	0.72
C16orf58	1275.11	YES	YES	-3.959	2081.92	2889.12	0.72
C8orf4	6840.74	YES	YES	-1.791	3408.18	4721.83	0.72
CCND3	1997.1	YES	YES	-3.062	1832.34	2545.26	0.72
CLPTM1L	4354.47	YES	YES	-3.486	4020.45	5568.58	0.72
CTSD	25100.5	YES	YES	-3.153	29496.8	41152	0.72
CXCL16	1596.07	YES	YES	-3.264	2179.48	3027.03	0.72
ENDOD1	1366.17	YES	YES	-2.785	1175.84	1635.09	0.72
ERO1LB	728.805	YES	YES	-2.112	276.38	383.03	0.72
FZD8	510.833	YES	YES	-2.469	196.94	272.55	0.72
GEM	1596.69	YES	YES	-2.133	562.23	785.48	0.72
GSTA4	561.526	YES	YES	-2.528	343.13	479.11	0.72
INHBB	1150.66	YES	YES	-1.81	308.72	426.29	0.72
JUN	3506.98	YES	YES	-2.867	3126.01	4323.85	0.72
LRCH4	587.744	YES	YES	-3.733	1011.66	1402.18	0.72
LRP3	731.397	YES	YES	-2.482	443.5	618.79	0.72
MPG	627.558	YES	YES	-3.184	809.12	1119.48	0.72
MXRA8	2027.07	YES	YES	-2.37	1203.48	1667.37	0.72
NEDD4L	1899.79	YES	YES	-2.898	1539.34	2147.74	0.72
NINJ1	779.09	YES	YES	-3.394	1028.9	1432.18	0.72
NISCH	684.717	YES	YES	-4.009	1232.75	1709.03	0.72
OPLAH	527.7	YES	YES	-2.433	334.35	466.38	0.72
PTP4A3	1446.35	YES	YES	-2.471	924.36	1277.71	0.72
SEPP1	5794.27	YES	YES	-2.302	4013.57	5574.24	0.72
SERPINF2	949.253	YES	YES	-1.836	185.22	257.41	0.72
SPARCL1	2449.81	YES	YES	-2.689	2377.48	3309.16	0.72
VAMP2	572.264	YES	YES	-4.141	992.93	1382.42	0.72
WDFY4	551.012	YES	YES	-1.995	293.13	406.13	0.72
ZDHHC16	528.713	YES	YES	-4.094	884.49	1228.98	0.72
ABHD11	574.232	YES	YES	-3.341	656.13	924.95	0.71
AG2	666.947	YES	YES	-2.259	362.17	507.32	0.71
ATP2C2	605.373	YES	YES	-2.03	381.49	540.76	0.71
BCAT2	495.575	YES	YES	-3.795	679.59	959.98	0.71
C1orf21	645.548	YES	YES	-2.554	555.95	784.29	0.71
CDC42EP3	1131.44	YES	YES	-3.087	923.76	1293.5	0.71
CGN	2288.14	YES	YES	-2.749	2195.46	3094.83	0.71
COBLL1	506.463	YES	YES	-3.202	563.01	787.66	0.71
CYFIP2	718.746	YES	YES	-2.47	674.67	949.58	0.71
DGKD	810.046	YES	YES	-3.27	847.91	1192.6	0.71
DOCK9	1152.83	YES	YES	-3.13	1276.34	1797.72	0.71
ENG	1676.71	YES	YES	-3.481	2231.43	3149.69	0.71
FAM46C	1111.41	YES	YES	-2.561	909.15	1274.27	0.71
FBXW4	516.341	YES	YES	-4.035	825	1163.35	0.71
HBA2	1485.98	YES	YES	-1.651	276.5	388.44	0.71
ISYNA1	840.941	YES	YES	-2.683	602.47	848.26	0.71
LOC80154	1106.63	YES	YES	-2.521	665.68	943.19	0.71
MAPK8IP3	1052.9	YES	YES	-2.56	817.65	1155.62	0.71
MID1IP1	912.874	YES	YES	-3.135	962.5	1348.68	0.71
MPZL2	3297.08	YES	YES	-2.473	2494.23	3521.83	0.71
NRBP2	629.976	YES	YES	-2.823	536.04	754.87	0.71
ORMDL3	1120.88	YES	YES	-4.215	1935.72	2715.05	0.71
PAM	3007.08	YES	YES	-3.433	3525.38	4978.25	0.71
PLD3	9832.47	YES	YES	-3.123	6948.78	9815.36	0.71
SEMA4A	766.386	YES	YES	-3.022	763.32	1067.71	0.71
SLC25A23	962.738	YES	YES	-3.673	1384.2	1945.39	0.71
TMEM63A	1122.32	YES	YES	-3.505	1433.67	2032.02	0.71
TNFSF13	764.403	YES	YES	-3.294	1025.41	1447.25	0.71
TRAM1	7048.98	YES	YES	-3.444	7869.94	11038	0.71
ARSD	1899.88	YES	YES	-2.796	1858.17	2647.21	0.7
BHMT	1203.49	YES	YES	-1.56	2.17	3.11	0.7
C1orf198	1308.54	YES	YES	-4.109	1783.87	2547.22	0.7
C3	28489.7	YES	YES	-1.904	11861.6	16889.7	0.7
C5orf4	1249.37	YES	YES	-2.089	400.97	574.71	0.7
CLIC2	685.558	YES	YES	-2.467	495.97	706.69	0.7
DPP7	1193.15	YES	YES	-3.436	1522.65	2172.34	0.7
DTX4	1293.2	YES	YES	-2.817	1164.64	1655.1	0.7
GABRE	564.75	YES	YES	-1.628	130.66	186.95	0.7
KCNJ15	1181.63	YES	YES	-1.575	302.4	432.15	0.7
MYO6	1719.98	YES	YES	-3.935	2352.26	3357.12	0.7
NEAT1	13701.8	YES	YES	-2.363	7260.67	10415	0.7
PLS3	5871.81	YES	YES	-3.285	5266.4	7518.66	0.7
PPP2R5A	1086.74	YES	YES	-4	1443.21	2051.31	0.7
PRSS8	3642.71	YES	YES	-2.817	3858.97	5504.34	0.7
RARA	574.535	YES	YES	-4.343	960.57	1381.47	0.7
RHOB	5110.98	YES	YES	-3.018	4281.98	6145.58	0.7
SLC40A1	4028.84	YES	YES	-2.49	2588.97	3701.23	0.7
SNX18	712.868	YES	YES	-4.069	751.58	1074.64	0.7
SPNS2	940.593	YES	YES	-2.289	457.62	654.48	0.7
TJP3	538.239	YES	YES	-2.798	520.02	746.61	0.7
VWF	3661.9	YES	YES	-2.499	2561.75	3639.41	0.7
ABI3BP	537.388	YES	YES	-2.012	261.92	379.91	0.69
ACAT1	760.976	YES	YES	-3.91	737.06	1067.75	0.69
BCAT1	2623.69	YES	YES	-2.035	943.43	1360.95	0.69
CABC1	577.307	YES	YES	-3.667	652.46	946.73	0.69
CADPS2	902.171	YES	YES	-3.465	930.98	1354.32	0.69
CDC42EP1	2223.68	YES	YES	-2.628	1651.15	2382.01	0.69
CRIP2	2186.84	YES	YES	-2.722	1722.42	2497.46	0.69
DUSP6	4227.33	YES	YES	-2.428	2838.49	4091.47	0.69
HLA-DQA1	5651.03	YES	YES	-2.009	2299.69	3334.88	0.69
HMCN1	1291.82	YES	YES	-2.36	400.38	579.17	0.69
HSDL2	674.699	YES	YES	-4.231	798.59	1165.43	0.69
LRIG1	1312.37	YES	YES	-3.431	1432.65	2066.62	0.69
MLPH	3588.22	YES	YES	-2.144	2114.15	3074.28	0.69
MTUS1	2913.05	YES	YES	-2.908	2401.49	3463.96	0.69
NAB2	511.213	YES	YES	-3.818	616.02	887.99	0.69
PLEKHB1	832.465	YES	YES	-2.458	480.3	698.41	0.69
RGS5	1583.56	YES	YES	-2.891	1292.68	1865.25	0.69
SGMS2	1218.58	YES	YES	-3.067	986.84	1433.91	0.69
SLC38A10	1834.24	YES	YES	-4.359	2872.93	4186.52	0.69
SYTL1	662.157	YES	YES	-2.747	574.57	835.26	0.69
TCF7L1	555.37	YES	YES	-2.507	319.15	461.07	0.69
TMEM63B	1234.6	YES	YES	-3.968	1545.84	2242.45	0.69
TSPAN11	1207.62	YES	YES	-1.65	192.72	279.81	0.69
WSB1	5894.98	YES	YES	-2.816	3180.43	4614.66	0.69
ZBTB4	969.787	YES	YES	-4.543	1647.21	2370.16	0.69
ABHD14B	727.958	YES	YES	-4.174	1020.37	1489.66	0.68
AHCYL2	4050.6	YES	YES	-2.313	1813.42	2668.65	0.68
ARHGDIB	3223.86	YES	YES	-3.416	3729.68	5455.21	0.68
BTG3	793.218	YES	YES	-3.941	869.12	1274.75	0.68
CAPS	1957.19	YES	YES	-2.095	517.05	759.66	0.68
CDC42BPA	1642	YES	YES	-3.102	1300	1908.56	0.68
CIITA	526.181	YES	YES	-2.535	410.71	602.58	0.68
CIRBP	1842.85	YES	YES	-4.672	2888.62	4277.25	0.68
CSF3R	1528.55	YES	YES	-2.159	497.44	730.15	0.68
CTSF	701.033	YES	YES	-3.355	703.9	1033.86	0.68
DUSP1	7115.09	YES	YES	-2.501	3537.51	5203.44	0.68
FAM176A	570.2	YES	YES	-2.472	287.28	422.38	0.68
FBXO2	676.585	YES	YES	-2.054	204.74	300.88	0.68
FNIP2	744.042	YES	YES	-2.86	593.89	878.29	0.68
HLA-DOA	1489.39	YES	YES	-2.294	843.84	1234.71	0.68
HNMT	831.439	YES	YES	-3.465	775.95	1148.78	0.68
LAMP3	2806.16	YES	YES	-2.248	1134.37	1658.67	0.68
LTA4H	2430.84	YES	YES	-4.217	3021.97	4453.33	0.68
MGP	4363.91	YES	YES	-2.631	2580.39	3815.63	0.68
MXD4	698.995	YES	YES	-4.615	1132.11	1663.29	0.68
MYO1G	1163.74	YES	YES	-2.193	404.84	595.03	0.68
RAPGEF5	677.983	YES	YES	-3.317	660.64	975.65	0.68
RHOU	819.632	YES	YES	-3.219	805.87	1180.64	0.68
SEZ6L2	2285.96	YES	YES	-2.106	1074.41	1570.27	0.68
SLC41A1	707.274	YES	YES	-3.886	794.82	1172.46	0.68
SMOC2	534.329	YES	YES	-2.364	290.89	430.4	0.68
TRIP6	822.907	YES	YES	-3.174	949.58	1395.45	0.68
AXIN2	582.01	YES	YES	-2.93	252.95	380.34	0.67
CD47	2555.25	YES	YES	-3.97	3355.51	4987.26	0.67
CPNE2	660.431	YES	YES	-4.276	794.04	1178.32	0.67
CYBRD1	2960.91	YES	YES	-2.976	1774	2667.6	0.67
FGFR2	602.09	YES	YES	-2.375	295	442.21	0.67
GGCX	969.207	YES	YES	-4.166	1100.2	1645.12	0.67
GLIS2	499.838	YES	YES	-3.926	597.06	895.38	0.67
GOLGA8B	604.107	YES	YES	-2.217	279.41	416.55	0.67
HLA-DRA	31072.7	YES	YES	-2.617	20170.2	30220.4	0.67
IL27RA	500.508	YES	YES	-3.501	502.51	751.48	0.67
MEGF9	1605.31	YES	YES	-3.251	1099.84	1638.54	0.67
PHLDA3	918.055	YES	YES	-3.148	844.28	1251.13	0.67
PODN	792.778	YES	YES	-2.941	606.15	901.13	0.67
SIAE	919.361	YES	YES	-3.202	711.58	1066.71	0.67
SLCO2A1	1314.23	YES	YES	-2.607	764.14	1133.27	0.67
WLS	1185.98	YES	YES	-2.946	1074.98	1598.7	0.67
YPEL3	850.323	YES	YES	-4.041	943.55	1400.22	0.67
ZDHHC9	2473.34	YES	YES	-3.785	2608.64	3918.22	0.67
ZNF238	707.373	YES	YES	-3.41	689.27	1028.96	0.67
A2M	20537.7	YES	YES	-3.073	14236.7	21461.2	0.66
ALCAM	3243.37	YES	YES	-3.764	3357.8	5105.2	0.66
APLP2	12708.1	YES	YES	-4.577	16816.5	25644.1	0.66
C10orf116	1073.52	YES	YES	-2.102	224.23	340.83	0.66
EFCAB4A	642.272	YES	YES	-2.829	361.43	546.1	0.66
FLRT3	1010.34	YES	YES	-2.286	484.62	728.92	0.66
FOS	8499.33	YES	YES	-2.463	3270.09	4939.37	0.66
HMGN3	1324.1	YES	YES	-4.076	1142.23	1727.72	0.66
KCNS3	716.995	YES	YES	-3.019	770.54	1162.35	0.66
LOC388152	587.46	YES	YES	-3.27	414.8	628.46	0.66
MALAT1	3673.47	YES	YES	-3.064	2535.22	3842.61	0.66
MEG3	876.946	YES	YES	-1.69	32.92	49.85	0.66
MGLL	3010.55	YES	YES	-3.255	2597.24	3952.87	0.66
NXN	874.481	YES	YES	-3.606	820.7	1234.81	0.66
PTPRU	1490.16	YES	YES	-2.757	1010.87	1536.91	0.66
RHPN1	521.127	YES	YES	-2.909	334.1	508.05	0.66
SH3BP5	942.687	YES	YES	-3.776	762.13	1157.61	0.66
SLIT3	508.919	YES	YES	-2.452	216.47	329.4	0.66
TMC4	1120.64	YES	YES	-3.724	1295.21	1969.97	0.66
TSC22D3	4689.61	YES	YES	-3.279	2802.38	4235.52	0.66
ARHGEF17	596.906	YES	YES	-4.682	878.97	1343.91	0.65
ARRDC3	3207.78	YES	YES	-3.736	2485.01	3834.41	0.65
CRABP2	7040.01	YES	YES	-1.646	1098.16	1697.48	0.65
DAPK1	1453.47	YES	YES	-3.649	1215.62	1878.21	0.65
FBLN5	791.44	YES	YES	-3.336	606.92	928.19	0.65
FCGRT	2222.72	YES	YES	-4.524	2694.26	4166.88	0.65
GPC3	1572.92	YES	YES	-2.138	219.64	336.26	0.65
HMHA1	742.867	YES	YES	-4.016	917.2	1408.47	0.65
LIMD1	1005.18	YES	YES	-4.324	974.74	1495.48	0.65
LTBP3	1981.02	YES	YES	-4.162	2322.62	3577.41	0.65
NCRNA00201	803.974	YES	YES	-3.223	537.17	829.54	0.65
NR4A1	4234.5	YES	YES	-2.351	1272.3	1947.53	0.65
PER1	1672.36	YES	YES	-3.196	1139.52	1764.39	0.65
PLLP	654.121	YES	YES	-2.613	313.47	481.57	0.65
RCAN2	758.477	YES	YES	-2.702	258.04	395.57	0.65
RGL1	613.131	YES	YES	-4.001	632.59	978.48	0.65
SCEL	1330.99	YES	YES	-1.844	393.97	605.52	0.65
SLC29A4	1311.11	YES	YES	-1.994	213.98	327.78	0.65
SPRY4	1059.11	YES	YES	-3.508	730.53	1129.61	0.65
ST6GALNAC6	567.574	YES	YES	-4.94	847.53	1297.03	0.65
VWA1	2066.24	YES	YES	-4.009	2183.26	3380.19	0.65
ACADSB	816.636	YES	YES	-3.727	556.02	872.96	0.64
C8orf73	879.356	YES	YES	-2.602	416.69	646.68	0.64
CD74	66940.2	YES	YES	-3.07	50058.5	78672.7	0.64
CKB	2980.22	YES	YES	-2.698	1136.21	1779.86	0.64
CRTAC1	912.454	YES	YES	-1.596	149.68	232.96	0.64
DCXR	972.941	YES	YES	-4.27	675.59	1057.45	0.64
ENPP4	626.844	YES	YES	-4.42	723.03	1122.52	0.64
ESAM	926.024	YES	YES	-3.589	607.72	944.63	0.64
FAM105A	2585.34	YES	YES	-3.001	483.04	753.85	0.64
FHOD1	774.478	YES	YES	-4.581	790.9	1241.06	0.64
LRAT	504.649	YES	YES	-1.86	32.8	51.36	0.64
MEF2C	541.215	YES	YES	-3.923	470.09	736.96	0.64
MMP15	1643.86	YES	YES	-3.421	1274.17	1992.03	0.64
MPP7	659.565	YES	YES	-3.878	679.7	1058.18	0.64
MRPS25	769.239	YES	YES	-4.856	819.86	1291.09	0.64
MYH11	2551.36	YES	YES	-2.431	988.15	1546.68	0.64
NECAB3	727.519	YES	YES	-3.926	553.03	870.37	0.64
OLFML3	2142.78	YES	YES	-3.055	545.18	853.1	0.64
PC	515.268	YES	YES	-4.033	477.02	745.27	0.64
PODNL1	567.757	YES	YES	-2.325	110.84	173.71	0.64
PODXL2	979.949	YES	YES	-2.215	497.15	780.08	0.64
SGSM2	794.673	YES	YES	-4.401	795.4	1251.19	0.64
TENC1	968.433	YES	YES	-4.232	963.11	1510	0.64
VSTM2L	2716.34	YES	YES	-1.898	540.1	840.5	0.64
ZNF322A	1969.67	YES	YES	-3.4	757.92	1178.7	0.64
ANO9	499.567	YES	YES	-3.512	300.61	479.88	0.63
B3GNT7	3840.29	YES	YES	-2.563	1004.22	1598.43	0.63
B4GALNT3	849.906	YES	YES	-2.822	409.99	651.95	0.63
C1QTNF3	1897.67	YES	YES	-3.053	109.84	175.27	0.63
C7orf41	571.102	YES	YES	-4.037	509.72	815.41	0.63
CSPG5	522.398	YES	YES	-2.56	58.13	92.74	0.63
CYTH3	1069.16	YES	YES	-4.124	729.25	1160.95	0.63
EFHD1	667.422	YES	YES	-2.283	108.57	173.39	0.63
ELF5	598.103	YES	YES	-1.756	72.04	114.28	0.63
FAM13A	1190.26	YES	YES	-3.829	918.1	1448.24	0.63
GALNT11	804.53	YES	YES	-5.483	933.25	1481.59	0.63
HLA-DPA1	11088	YES	YES	-3.055	6990.75	11153.6	0.63
HLA-DPB1	6481.83	YES	YES	-3.043	4448.26	7032.83	0.63
LPIN2	2278.94	YES	YES	-4.293	1772.92	2811.22	0.63
NEDD9	3734.59	YES	YES	-3.535	1743.69	2778.04	0.63
PRKCZ	1007.41	YES	YES	-4.048	662.28	1059.08	0.63
SDC1	9781.64	YES	YES	-4.176	8747.65	13906.1	0.63
SLC25A29	688.692	YES	YES	-4.01	507.15	806.25	0.63
SLC27A3	531.889	YES	YES	-4.514	411.49	657.97	0.63
SLC43A3	1724.26	YES	YES	-3.779	1607.42	2554.02	0.63
SOD3	796.241	YES	YES	-3.162	452.12	716.7	0.63
SORBS2	900.056	YES	YES	-2.479	353.22	562.28	0.63
SYT7	1330.04	YES	YES	-2.413	506.93	809.58	0.63
ABCA13	539.391	YES	YES	-1.703	58.87	94.38	0.62
ADRA2A	1347.28	YES	YES	-1.973	105.13	169.91	0.62
CACHD1	597.99	YES	YES	-2.638	203.56	328.39	0.62
CGNL1	684.528	YES	YES	-3.557	445.97	715.03	0.62
CRY2	617.192	YES	YES	-5.057	662.06	1062.47	0.62
CYP4X1	558.135	YES	YES	-2.182	122.66	199.16	0.62
DDAH1	1370.18	YES	YES	-4.911	1550.28	2488.69	0.62
DUOX1	1191	YES	YES	-2.088	279	448.72	0.62
ECHDC2	508.268	YES	YES	-4.211	485.51	780.98	0.62
HIF3A	680.509	YES	YES	-2.016	81.28	131.05	0.62
ITPR2	782.719	YES	YES	-3.878	594.85	954.64	0.62
LOC651250	1641.16	YES	YES	-5.261	1580.71	2543.92	0.62
LYNX1	787.037	YES	YES	-2.58	129.51	209.13	0.62
MAOA	3746.43	YES	YES	-2.813	1494.82	2396.64	0.62
NPNT	2332.14	YES	YES	-2.84	802.23	1298.57	0.62
ProSAPiP1	782.775	YES	YES	-3.947	743.4	1194.7	0.62
PTN	1072.27	YES	YES	-2.574	58.36	93.95	0.62
SDR16C5	1324.85	YES	YES	-2.427	557.49	892.1	0.62
SLC44A4	2460.73	YES	YES	-2.394	1330.58	2156.41	0.62
SLC9A3R2	1638.81	YES	YES	-4.133	1406.15	2264.27	0.62
SMPDL3B	1341.86	YES	YES	-3.485	736.55	1187.17	0.62
[truncated: 18,502 more rows]

## Sheet: Supplemental Table 6B
Ensembl ID	Gene Symbol	Stdev Filter (Q3=0.1042161)	Selected	FDR<5%	d(i)	Geom mean of intensities in class 1	Geom mean of intensities in class 2	Fold-change (C1 vs Other)
ENSG00000000419	DPM1	0.0150938	NO	NO
ENSG00000000457		0.00825178	NO	NO
ENSG00000000460	C1ORF112	0.0900326	NO	NO
ENSG00000000938	FGR	0.107504	YES	NO
ENSG00000000971	CFH	0.0751101	NO	NO
ENSG00000001036	FUCA2	0.0238201	NO	NO
ENSG00000001167	NFYA	0.00652876	NO	NO
ENSG00000001460	STPG1	0.0970889	NO	NO
ENSG00000001461	NIPAL3	0.0153939	NO	NO
ENSG00000001561	ENPP4	0.0190723	NO	NO
ENSG00000001617	SEMA3F	0.0108638	NO	NO
ENSG00000001629	ANKIB1	0.0136549	NO	NO
ENSG00000001630	CYP51A1	0.0153133	NO	NO
ENSG00000001631	KRIT1	0.00869072	NO	NO
ENSG00000002016	RAD52	0.0153056	NO	NO
ENSG00000002330	BAD	0.00979967	NO	NO
ENSG00000002549	LAP3	0.00815337	NO	NO
ENSG00000002587	HS3ST1	0.035202	NO	NO
ENSG00000002745	WNT16	0.0749059	NO	NO
ENSG00000002746	HECW1	0.111742	YES	NO
ENSG00000002822	MAD1L1	0.00858288	NO	NO
ENSG00000002834	LASP1	0.0283639	NO	NO
ENSG00000002919	SNX11	0.119638	YES	NO
ENSG00000002933	TMEM176A	0.143058	YES	YES	-2.09	-2.09	-2.09	-2.09
ENSG00000003137	CYP26B1	0.0608475	NO	NO
ENSG00000003147	ICA1	0.0566627	NO	NO
ENSG00000003249	DBNDD1	0.0451361	NO	NO
ENSG00000003393	ALS2	0.010461	NO	NO
ENSG00000003400	CASP10	0.0835494	NO	NO
ENSG00000003402	CFLAR	0.0204762	NO	NO
ENSG00000003509	NDUFAF7	0.0097142	NO	NO
ENSG00000003756	RBM5	0.0294016	NO	NO
ENSG00000003987	MTMR7	0.12606	YES	NO
ENSG00000003989	SLC7A2	0.0556033	NO	NO
ENSG00000004059	ARF5	0.0260893	NO	NO
ENSG00000004142	POLDIP2	0.0107418	NO	NO
ENSG00000004399	PLXND1	0.0291994	NO	NO
ENSG00000004455	AK2	0.0367291	NO	NO
ENSG00000004468	CD38	0.127395	YES	NO
ENSG00000004478	FKBP4	0.0396738	NO	NO
ENSG00000004487	KDM1A	0.0184091	NO	NO
ENSG00000004534	RBM6	0.0140729	NO	NO
ENSG00000004700	RECQL	0.0135205	NO	NO
ENSG00000004766		0.0147333	NO	NO
ENSG00000004776	HSPB6	0.0176137	NO	NO
ENSG00000004777	ARHGAP33	0.217372	YES	YES	-2.481	-2.481	-2.481	-2.481
ENSG00000004779	NDUFAB1	0.0136097	NO	NO
ENSG00000004809	SLC22A16	0.11514	YES	NO
ENSG00000004838	ZMYND10	0.0221765	NO	NO
ENSG00000004846	ABCB5	0.0940772	NO	NO
ENSG00000004864	SLC25A13	0.0105749	NO	NO
ENSG00000004866		0.0214269	NO	NO
ENSG00000004897	CDC27	0.00815528	NO	NO
ENSG00000004939	SLC4A1	0.0974791	NO	NO
ENSG00000004948	CALCR	0.105341	YES	NO
ENSG00000004975	DVL2	0.0234953	NO	NO
ENSG00000005001	PRSS22	0.0625417	NO	NO
ENSG00000005007	UPF1	0.00548026	NO	NO
ENSG00000005020	SKAP2	0.188108	YES	YES	5.527	5.527	5.527	5.527
ENSG00000005059	CCDC109B	0.0300098	NO	NO
ENSG00000005073	HOXA11	0.105462	YES	NO
ENSG00000005100	DHX33	0.0195102	NO	NO
ENSG00000005102	MEOX1	0.101828	NO	NO
ENSG00000005108	THSD7A	0.124812	YES	YES	-2.669	-2.669	-2.669	-2.669
ENSG00000005156	LIG3	0.0166588	NO	NO
ENSG00000005175	RPAP3	0.0260107	NO	NO
ENSG00000005189		0.00920465	NO	NO
ENSG00000005194	CIAPIN1	0.0056633	NO	NO
ENSG00000005206	SPPL2B	0.0220508	NO	NO
ENSG00000005238	FAM214B	0.0121198	NO	NO
ENSG00000005243	COPZ2	0.0688391	NO	NO
ENSG00000005249	PRKAR2B	0.0486439	NO	NO
ENSG00000005339	CREBBP	0.0413833	NO	NO
ENSG00000005379	BZRAP1	0.124728	YES	YES	-2.265	-2.265	-2.265	-2.265
ENSG00000005381	MPO	0.100974	NO	NO
ENSG00000005436	GCFC2	0.0312986	NO	NO
ENSG00000005448	WDR54	0.0359837	NO	NO
ENSG00000005469	CROT	0.0183817	NO	NO
ENSG00000005471	ABCB4	0.100349	NO	NO
ENSG00000005483	KMT2E	0.00883326	NO	NO
ENSG00000005513	SOX8	0.131355	YES	YES	-1.865	-1.865	-1.865	-1.865
ENSG00000005700	IBTK	0.0144469	NO	NO
ENSG00000005801	ZNF195	0.0152819	NO	NO
ENSG00000005810	MYCBP2	0.00750816	NO	NO
ENSG00000005812	FBXL3	0.00642641	NO	NO
ENSG00000005844	ITGAL	0.0871353	NO	NO
ENSG00000005882	PDK2	0.011366	NO	NO
ENSG00000005884	ITGA3	0.0216676	NO	NO
ENSG00000005955		0.00694026	NO	NO
ENSG00000005961	ITGA2B	0.0842275	NO	NO
ENSG00000006007	GDE1	0.031664	NO	NO
ENSG00000006015	C19ORF60	0.0784786	NO	NO
ENSG00000006016	CRLF1	0.0559262	NO	NO
ENSG00000006025	OSBPL7	0.0681014	NO	NO
ENSG00000006042	TMEM98	0.077865	NO	NO
ENSG00000006047	YBX2	0.0661986	NO	NO
ENSG00000006059	KRT33A	0.100886	NO	NO
ENSG00000006062	MAP3K14	0.00856395	NO	NO
ENSG00000006071	ABCC8	0.099267	NO	NO
ENSG00000006074		0.136669	YES	NO
ENSG00000006075		0.143669	YES	NO
ENSG00000006114		0.00997652	NO	NO
ENSG00000006116	CACNG3	0.110525	YES	NO
ENSG00000006118	TMEM132A	0.0257753	NO	NO
ENSG00000006125	AP2B1	0.0153	NO	NO
ENSG00000006128	TAC1	0.145471	YES	NO
ENSG00000006194	ZNF263	0.0325885	NO	NO
ENSG00000006210	CX3CL1	0.107142	YES	NO
ENSG00000006282	SPATA20	0.0740826	NO	NO
ENSG00000006283	CACNA1G	0.0722539	NO	NO
ENSG00000006327	TNFRSF12A	0.12218	YES	NO
ENSG00000006377	DLX6	0.124869	YES	NO
ENSG00000006432	MAP3K9	0.0420923	NO	NO
ENSG00000006451	RALA	0.0210426	NO	NO
ENSG00000006453	BAIAP2L1	0.0159473	NO	NO
ENSG00000006459	KDM7A	0.0173849	NO	NO
ENSG00000006468	ETV1	0.0411911	NO	NO
ENSG00000006530	AGK	0.0317049	NO	NO
ENSG00000006534	ALDH3B1	0.0760104	NO	NO
ENSG00000006555	TTC22	0.037024	NO	NO
ENSG00000006576	PHTF2	0.00913222	NO	NO
ENSG00000006606	CCL26	0.0768982	NO	NO
ENSG00000006607	FARP2	0.0367114	NO	NO
ENSG00000006611	USH1C	0.0881655	NO	NO
ENSG00000006634	DBF4	0.00990814	NO	NO
ENSG00000006638	TBXA2R	0.0429066	NO	NO
ENSG00000006652	IFRD1	0.0963434	NO	NO
ENSG00000006659	LGALS14	0.0874267	NO	NO
ENSG00000006695	COX10	0.0248467	NO	NO
ENSG00000006704	GTF2IRD1	0.0684919	NO	NO
ENSG00000006712	PAF1	0.0101182	NO	NO
ENSG00000006740	ARHGAP44	0.0522364	NO	NO
ENSG00000006744	ELAC2	0.00576758	NO	NO
ENSG00000006747	SCIN	0.04355	NO	NO
ENSG00000006788	MYH13	0.139906	YES	NO
ENSG00000006831	ADIPOR2	0.0365016	NO	NO
ENSG00000006837	CDKL3	0.00998885	NO	NO
ENSG00000007001	UPP2	0.0208169	NO	NO
ENSG00000007038	PRSS21	0.093883	NO	NO
ENSG00000007047	MARK4	0.0181141	NO	NO
ENSG00000007062	PROM1	0.162302	YES	YES	-2.29	-2.29	-2.29	-2.29
ENSG00000007080	CCDC124	0.01325	NO	NO
ENSG00000007168	PAFAH1B1	0.020286	NO	NO
ENSG00000007171		0.0845734	NO	NO
ENSG00000007174	DNAH9	0.108718	YES	NO
ENSG00000007202	KIAA0100	0.00954872	NO	NO
ENSG00000007216	SLC13A2	0.0549409	NO	NO
ENSG00000007237	GAS7	0.141486	YES	NO
ENSG00000007255	TRAPPC6A	0.00683544	NO	NO
ENSG00000007264	MATK	0.0857809	NO	NO
ENSG00000007306	CEACAM7	0.114872	YES	YES	-2.562	-2.562	-2.562	-2.562
ENSG00000007312	CD79B	0.0773687	NO	NO
ENSG00000007314	SCN4A	0.0595441	NO	NO
ENSG00000007341	ST7L	0.180113	YES	YES	-5.427	-5.427	-5.427	-5.427
ENSG00000007372	PAX6	0.122293	YES	NO
ENSG00000007376	RPUSD1	0.0221518	NO	NO
ENSG00000007384	RHBDF1	0.061164	NO	NO
ENSG00000007392	LUC7L	0.0624357	NO	NO
ENSG00000007402	CACNA2D2	0.0408643	NO	NO
ENSG00000007516	BAIAP3	0.0888214	NO	NO
ENSG00000007520	TSR3	0.022882	NO	NO
ENSG00000007545		0.0134446	NO	NO
ENSG00000007866	TEAD3	0.0544646	NO	NO
ENSG00000007908	SELE	0.0981284	NO	NO
ENSG00000007923	DNAJC11	0.0517145	NO	NO
ENSG00000007933	FMO3	0.114419	YES	NO
ENSG00000007944	MYLIP	0.00676325	NO	NO
ENSG00000007968	E2F2	0.0130944	NO	NO
ENSG00000008083	JARID2	0.00900152	NO	NO
ENSG00000008118	CAMK1G	0.0997402	NO	NO
ENSG00000008128	CDK11A	0.0515168	NO	NO
ENSG00000008130	NADK	0.0500264	NO	NO
ENSG00000008196	TFAP2B	0.161613	YES	YES	-2.551	-2.551	-2.551	-2.551
ENSG00000008197	TFAP2D	0.222342	YES	YES	-2.854	-2.854	-2.854	-2.854
ENSG00000008226	DLEC1	0.135063	YES	NO
ENSG00000008256	CYTH3	0.0500941	NO	NO
ENSG00000008277	ADAM22	0.0613034	NO	NO
ENSG00000008282	SYPL1	0.0296608	NO	NO
ENSG00000008283	CYB561	0.0373907	NO	NO
ENSG00000008294	SPAG9	0.00638238	NO	NO
ENSG00000008300	CELSR3	0.101137	NO	NO
ENSG00000008311	AASS	0.0321632	NO	NO
ENSG00000008323	PLEKHG6	0.0439549	NO	NO
ENSG00000008324	SS18L2	0.00565437	NO	NO
ENSG00000008382	MPND	0.0180536	NO	NO
ENSG00000008394	MGST1	0.102257	NO	NO
ENSG00000008405	CRY1	0.0165626	NO	NO
ENSG00000008438	PGLYRP1	0.0986462	NO	NO
ENSG00000008441	NFIX	0.0265618	NO	NO
ENSG00000008513	ST3GAL1	0.0358202	NO	NO
ENSG00000008516	MMP25	0.117032	YES	YES	-2.975	-2.975	-2.975	-2.975
ENSG00000008517	IL32	0.073037	NO	NO
ENSG00000008735	MAPK8IP2	0.0506176	NO	NO
ENSG00000008838		0.0222651	NO	NO
ENSG00000008853	RHOBTB2	0.110483	YES	NO
ENSG00000008869	HEATR5B	0.00961709	NO	NO
ENSG00000008952	SEC62	0.0394342	NO	NO
ENSG00000008988	RPS20	0.0176103	NO	NO
ENSG00000009307	CSDE1	0.0322868	NO	NO
ENSG00000009335	UBE3C	0.0172368	NO	NO
ENSG00000009413	REV3L	0.00776764	NO	NO
ENSG00000009709	PAX7	0.155971	YES	NO
ENSG00000009724	MASP2	0.0456138	NO	NO
ENSG00000009765	IYD	0.10487	YES	NO
ENSG00000009780	FAM76A	0.0247918	NO	NO
ENSG00000009790	TRAF3IP3	0.126048	YES	NO
ENSG00000009830	POMT2	0.00834076	NO	NO
ENSG00000009844	VTA1	0.00676623	NO	NO
ENSG00000009950	MLXIPL	0.0367028	NO	NO
ENSG00000009954	BAZ1B	0.00628503	NO	NO
ENSG00000010017	RANBP9	0.00799869	NO	NO
ENSG00000010030	ETV7	0.0911892	NO	NO
ENSG00000010072	SPRTN	0.0901754	NO	NO
ENSG00000010165	METTL13	0.0118543	NO	NO
ENSG00000010219	DYRK4	0.109421	YES	NO
ENSG00000010244	ZNF207	0.0205669	NO	NO
ENSG00000010270	STARD3NL	0.0163755	NO	NO
ENSG00000010278	CD9	0.165932	YES	NO
ENSG00000010282	HHATL	0.105693	YES	NO
ENSG00000010292	NCAPD2	0.00996005	NO	NO
ENSG00000010295	IFFO1	0.0954689	NO	NO
ENSG00000010310	GIPR	0.0390689	NO	NO
ENSG00000010318	PHF7	0.0223738	NO	NO
ENSG00000010319	SEMA3G	0.0503699	NO	NO
ENSG00000010322	NISCH	0.0540232	NO	NO
ENSG00000010327	STAB1	0.0804115	NO	NO
ENSG00000010361	FUZ	0.00701407	NO	NO
ENSG00000010379	SLC6A13	0.107275	YES	NO
ENSG00000010438	PRSS3	0.081306	NO	NO
ENSG00000010539	ZNF200	0.173928	YES	NO
ENSG00000010610	CD4	0.0829853	NO	NO
ENSG00000010626	LRRC23	0.0155957	NO	NO
ENSG00000010704	HFE	0.0449849	NO	NO
ENSG00000010803	SCMH1	0.0222011	NO	NO
ENSG00000010810	FYN	0.0121721	NO	NO
ENSG00000010818	HIVEP2	0.00602014	NO	NO
ENSG00000010932	FMO1	0.100022	NO	NO
ENSG00000011007	TCEB3	0.0105655	NO	NO
ENSG00000011009	LYPLA2	0.0315383	NO	NO
ENSG00000011021	CLCN6	0.00820261	NO	NO
ENSG00000011028	MRC2	0.0468575	NO	NO
ENSG00000011052	NME2	0.00882649	NO	NO
ENSG00000011083	SLC6A7	0.0877905	NO	NO
ENSG00000011105	TSPAN9	0.0145372	NO	NO
ENSG00000011114	BTBD7	0.0101027	NO	NO
ENSG00000011143	MKS1	0.038043	NO	NO
ENSG00000011198	ABHD5	0.0150535	NO	NO
ENSG00000011243	AKAP8L	0.0138903	NO	NO
ENSG00000011258	MBTD1	0.00898451	NO	NO
ENSG00000011260	UTP18	0.00928631	NO	NO
ENSG00000011275	RNF216	0.0135284	NO	NO
ENSG00000011295	TTC19	0.0160466	NO	NO
ENSG00000011304	PTBP1	0.00805545	NO	NO
ENSG00000011332	DPF1	0.0858234	NO	NO
ENSG00000011347	SYT7	0.027881	NO	NO
ENSG00000011376	LARS2	0.0152497	NO	NO
ENSG00000011405	PIK3C2A	0.00657764	NO	NO
ENSG00000011422	PLAUR	0.0464971	NO	NO
ENSG00000011426	ANLN	0.0116381	NO	NO
ENSG00000011451	WIZ	0.0466953	NO	NO
ENSG00000011454	RABGAP1	0.056602	NO	NO
ENSG00000011465	DCN	0.141317	YES	NO
ENSG00000011478	QPCTL	0.0076267	NO	NO
ENSG00000011485	PPP5C	0.0146287	NO	NO
ENSG00000011523	CEP68	0.00973191	NO	NO
ENSG00000011566	MAP4K3	0.00920542	NO	NO
ENSG00000011590	ZBTB32	0.0959987	NO	NO
ENSG00000011600	TYROBP	0.0962971	NO	NO
ENSG00000011638	TMEM159	0.0371756	NO	NO
ENSG00000012048	BRCA1	0.0735112	NO	NO
ENSG00000012171	SEMA3B	0.0602251	NO	NO
ENSG00000012504	NR1H4	0.117923	YES	NO
ENSG00000012779	ALOX5	0.0635228	NO	NO
ENSG00000012822	CALCOCO1	0.00818837	NO	NO
ENSG00000012963	UBR7	0.00730562	NO	NO
ENSG00000012983	MAP4K5	0.0848303	NO	NO
ENSG00000013016	EHD3	0.0612533	NO	NO
ENSG00000013275	PSMC4	0.0155093	NO	NO
ENSG00000013288	MAN2B2	0.0209923	NO	NO
ENSG00000013293	SLC7A14	0.0995399	NO	NO
ENSG00000013297	CLDN11	0.124156	YES	NO
ENSG00000013306	SLC25A39	0.0108223	NO	NO
ENSG00000013364	MVP	0.0571947	NO	NO
ENSG00000013374	NUB1	0.0257448	NO	NO
ENSG00000013375	PGM3	0.0532316	NO	NO
ENSG00000013392	RWDD2A	0.0173627	NO	NO
ENSG00000013441	CLK1	0.0127117	NO	NO
ENSG00000013503	POLR3B	0.0171078	NO	NO
ENSG00000013523	ANGEL1	0.0711642	NO	NO
ENSG00000013573	DDX11	0.00902507	NO	NO
ENSG00000013583	HEBP1	0.00987563	NO	NO
ENSG00000013588	GPRC5A	0.0303481	NO	NO
ENSG00000013725	CD6	0.0889129	NO	NO
ENSG00000013810	TACC3	0.0085859	NO	NO
ENSG00000014123	UFL1	0.0134039	NO	NO
ENSG00000014138	POLA2	0.00834413	NO	NO
ENSG00000014216	CAPN1	0.0737102	NO	NO
ENSG00000014257	ACPP	0.0912763	NO	NO
ENSG00000014641	MDH1	0.00956399	NO	NO
ENSG00000014824	SLC30A9	0.0116372	NO	NO
ENSG00000014914	MTMR11	0.110941	YES	NO
ENSG00000014919	COX15	0.0115956	NO	NO
ENSG00000015133	CCDC88C	0.018375	NO	NO
ENSG00000015153	YAF2	0.0231874	NO	NO
ENSG00000015171	ZMYND11	0.0181927	NO	NO
ENSG00000015413	DPEP1	0.0465028	NO	NO
ENSG00000015475	BID	0.0413981	NO	NO
ENSG00000015479	MATR3	0.0280633	NO	NO
ENSG00000015520	NPC1L1	0.0660279	NO	NO
ENSG00000015532	XYLT2	0.0316933	NO	NO
ENSG00000015592	STMN4	0.0948418	NO	NO
ENSG00000015676	NUDCD3	0.00863624	NO	NO
ENSG00000016082	ISL1	0.164694	YES	YES	-2.005	-2.005	-2.005	-2.005
ENSG00000016391	CHDH	0.0514271	NO	NO
ENSG00000016402	IL20RA	0.146904	YES	NO
ENSG00000016490	CLCA1	0.09615	NO	NO
ENSG00000016602	CLCA4	0.0418002	NO	NO
ENSG00000016864	GLT8D1	0.00572192	NO	NO
ENSG00000017260	ATP2C1	0.099826	NO	NO
ENSG00000017373		0.0313116	NO	NO
ENSG00000017427	IGF1	0.124383	YES	NO
ENSG00000017797	RALBP1	0.0399322	NO	NO
ENSG00000018189	RUFY3	0.00885515	NO	NO
ENSG00000018236	CNTN1	0.0885625	NO	NO
ENSG00000018280	SLC11A1	0.0896822	NO	NO
ENSG00000018408	WWTR1	0.173907	YES	NO
ENSG00000018510	AGPS	0.00808466	NO	NO
ENSG00000018607		0.0779075	NO	NO
ENSG00000018625	ATP1A2	0.113495	YES	NO
ENSG00000018699	TTC27	0.0312588	NO	NO
ENSG00000019102	VSIG2	0.119694	YES	NO
ENSG00000019144	PHLDB1	0.0903936	NO	NO
ENSG00000019169	MARCO	0.127176	YES	NO
ENSG00000019186	CYP24A1	0.0660465	NO	NO
ENSG00000019485	PRDM11	0.125005	YES	YES	-3.017	-3.017	-3.017	-3.017
ENSG00000019505	SYT13	0.0944511	NO	NO
ENSG00000019549	SNAI2	0.0868565	NO	NO
ENSG00000019582	CD74	0.0798758	NO	NO
ENSG00000019991		0.158774	YES	NO
ENSG00000019995	ZRANB1	0.0277126	NO	NO
ENSG00000020129	NCDN	0.0189924	NO	NO
ENSG00000020181		0.060921	NO	NO
ENSG00000020426	MNAT1	0.025589	NO	NO
ENSG00000020577	SAMD4A	0.013725	NO	NO
ENSG00000020633	RUNX3	0.0868206	NO	NO
ENSG00000020922	MRE11A	0.00600219	NO	NO
ENSG00000021300	PLEKHB1	0.0836629	NO	NO
ENSG00000021355	SERPINB1	0.0168377	NO	NO
ENSG00000021461	CYP3A43	0.105496	YES	NO
ENSG00000021488	SLC7A9	0.100921	NO	NO
ENSG00000021574	SPAST	0.00695032	NO	NO
ENSG00000021762	OSBPL5	0.0823119	NO	NO
ENSG00000021776	AQR	0.0213569	NO	NO
ENSG00000021826		0.00685424	NO	NO
ENSG00000022277	RTFDC1	0.0215479	NO	NO
ENSG00000022355	GABRA1	0.112099	YES	NO
ENSG00000022567	SLC45A4	0.0860743	NO	NO
ENSG00000022840	RNF10	0.0133161	NO	NO
ENSG00000022976	ZNF839	0.0043392	NO	NO
ENSG00000023041	ZDHHC6	0.00766389	NO	NO
ENSG00000023171	GRAMD1B	0.124482	YES	NO
ENSG00000023191		0.0143979	NO	NO
ENSG00000023228	NDUFS1	0.0175465	NO	NO
ENSG00000023318	ERP44	0.0130608	NO	NO
ENSG00000023330	ALAS1	0.045211	NO	NO
ENSG00000023445	BIRC3	0.0158147	NO	NO
ENSG00000023516	AKAP11	0.021349	NO	NO
ENSG00000023572	GLRX2	0.0465704	NO	NO
ENSG00000023608	SNAPC1	0.0133242	NO	NO
ENSG00000023697	DERA	0.0164934	NO	NO
ENSG00000023734		0.0146398	NO	NO
ENSG00000023839	ABCC2	0.098283	NO	NO
ENSG00000023892		0.0828114	NO	NO
ENSG00000023902	PLEKHO1	0.129916	YES	YES	-2.333	-2.333	-2.333	-2.333
ENSG00000023909	GCLM	0.0131506	NO	NO
ENSG00000024048	UBR2	0.00618166	NO	NO
ENSG00000024422	EHD2	0.0385401	NO	NO
ENSG00000024526	DEPDC1	0.0371143	NO	NO
ENSG00000024862	CCDC28A	0.00825289	NO	NO
ENSG00000025039	RRAGD	0.0360028	NO	NO
ENSG00000025156	HSF2	0.00821031	NO	NO
ENSG00000025293	PHF20	0.0246625	NO	NO
ENSG00000025423	HSD17B6	0.00792956	NO	NO
ENSG00000025434	NR1H3	0.0115273	NO	NO
ENSG00000025708	TYMP	0.0265091	NO	NO
ENSG00000025770	NCAPH2	0.0161006	NO	NO
ENSG00000025772	TOMM34	0.0124108	NO	NO
ENSG00000025796	SEC63	0.016695	NO	NO
ENSG00000025800	KPNA6	0.0101264	NO	NO
ENSG00000026025	VIM	0.0613649	NO	NO
ENSG00000026036		0.0382401	NO	NO
ENSG00000026103		0.0174322	NO	NO
ENSG00000026297	RNASET2	0.0133359	NO	NO
ENSG00000026508	CD44	0.0509037	NO	NO
ENSG00000026559	KCNG1	0.125694	YES	NO
ENSG00000026652	AGPAT4	0.0555719	NO	NO
ENSG00000026751	SLAMF7	0.10218	NO	NO
ENSG00000026950	BTN3A1	0.0439914	NO	NO
ENSG00000027001	MIPEP	0.0266383	NO	NO
ENSG00000027644	INSRR	0.0913697	NO	NO
ENSG00000027697	IFNGR1	0.00760974	NO	NO
ENSG00000027847	B4GALT7	0.0111852	NO	NO
ENSG00000027869	SH2D2A	0.148981	YES	YES	-2.216	-2.216	-2.216	-2.216
ENSG00000028116	VRK2	0.0362997	NO	NO
ENSG00000028137	TNFRSF1B	0.0337307	NO	NO
ENSG00000028203	VEZT	0.00626566	NO	NO
ENSG00000028277	POU2F2	0.033305	NO	NO
ENSG00000028310	BRD9	0.00953989	NO	NO
ENSG00000028528	SNX1	0.00822488	NO	NO
ENSG00000028839	TBPL1	0.0306049	NO	NO
ENSG00000029153	ARNTL2	0.0954203	NO	NO
ENSG00000029363	BCLAF1	0.00835996	NO	NO
ENSG00000029364	SLC39A9	0.0185067	NO	NO
ENSG00000029534	ANK1	0.162806	YES	NO
ENSG00000029559	IBSP	0.1019	NO	NO
ENSG00000029639	TFB1M	0.0184387	NO	NO
ENSG00000029725	RABEP1	0.0390273	NO	NO
ENSG00000030066	NUP160	0.0107494	NO	NO
ENSG00000030110	BAK1	0.0333496	NO	NO
ENSG00000030304	MUSK	0.0806946	NO	NO
ENSG00000030419	IKZF2	0.0155644	NO	NO
ENSG00000030582	GRN	0.022531	NO	NO
ENSG00000031081	ARHGAP31	0.0227374	NO	NO
ENSG00000031544		0.067183	NO	NO
ENSG00000031691	CENPQ	0.0143011	NO	NO
ENSG00000031698		0.0454866	NO	NO
ENSG00000032219	ARID4A	0.0110913	NO	NO
ENSG00000032389	TSSC1	0.0276289	NO	NO
ENSG00000032444	PNPLA6	0.0327367	NO	NO
ENSG00000032742	IFT88	0.0250953	NO	NO
ENSG00000033011	ALG1	0.0128597	NO	NO
ENSG00000033030	ZCCHC8	0.0391217	NO	NO
ENSG00000033050	ABCF2	0.0156483	NO	NO
ENSG00000033100	CHPF2	0.009188	NO	NO
ENSG00000033122	LRRC7	0.142305	YES	NO
ENSG00000033170	FUT8	0.0303169	NO	NO
ENSG00000033327	GAB2	0.0773933	NO	NO
ENSG00000033627	ATP6V0A1	0.0159302	NO	NO
ENSG00000033800	PIAS1	0.0288277	NO	NO
ENSG00000033867	SLC4A7	0.00927404	NO	NO
ENSG00000034063		0.0496316	NO	NO
ENSG00000034152	MAP2K3	0.0141675	NO	NO
ENSG00000034239	EFCAB1	0.134468	YES	YES	-1.832	-1.832	-1.832	-1.832
ENSG00000034510	TMSB10	0.00841542	NO	NO
ENSG00000034693	PEX3	0.00821715	NO	NO
ENSG00000034713	GABARAPL2	0.0128095	NO	NO
ENSG00000034971	MYOC	0.0743141	NO	NO
ENSG00000035141	FAM136A	0.055842	NO	NO
ENSG00000035403	VCL	0.00706932	NO	NO
ENSG00000035499	DEPDC1B	0.00633278	NO	NO
ENSG00000035681	NSMAF	0.0193671	NO	NO
ENSG00000035687	ADSS	0.0119975	NO	NO
ENSG00000035720		0.0788116	NO	NO
ENSG00000035862	TIMP2	0.0637605	NO	NO
ENSG00000035928	RFC1	0.0209484	NO	NO
ENSG00000036054	TBC1D23	0.0307632	NO	NO
ENSG00000036257	CUL3	0.00676861	NO	NO
ENSG00000036448	MYOM2	0.0813485	NO	NO
ENSG00000036530	CYP46A1	0.0221234	NO	NO
ENSG00000036549	ZZZ3	0.00678469	NO	NO
ENSG00000036565	SLC18A1	0.0867515	NO	NO
ENSG00000036672	USP2	0.0236662	NO	NO
ENSG00000036828	CASR	0.10919	YES	NO
ENSG00000037042	TUBG2	0.0211147	NO	NO
ENSG00000037241	RPL26L1	0.043631	NO	NO
ENSG00000037280	FLT4	0.12105	YES	NO
ENSG00000037474	NSUN2	0.00878022	NO	NO
ENSG00000037637	FBXO42	0.0165098	NO	NO
ENSG00000037749	MFAP3	0.00739212	NO	NO
ENSG00000037757	MRI1	0.0385705	NO	NO
ENSG00000037897	METTL1	0.00852398	NO	NO
ENSG00000037965	HOXC8	0.124466	YES	NO
ENSG00000038002	AGA	0.0263873	NO	NO
ENSG00000038210	PI4K2B	0.0167767	NO	NO
ENSG00000038274	MAT2B	0.0680241	NO	NO
ENSG00000038295	TLL1	0.109563	YES	NO
ENSG00000038358	EDC4	0.00848724	NO	NO
ENSG00000038382	TRIO	0.0202006	NO	NO
ENSG00000038427	VCAN	0.168748	YES	YES	-2.738	-2.738	-2.738	-2.738
ENSG00000038532	CLEC16A	0.0288115	NO	NO
ENSG00000039068		0.0466965	NO	NO
ENSG00000039123	SKIV2L2	0.0103506	NO	NO
ENSG00000039139	DNAH5	0.0905928	NO	NO
ENSG00000039319	ZFYVE16	0.0125844	NO	NO
ENSG00000039537		0.115842	YES	NO
ENSG00000039560	RAI14	0.0116835	NO	NO
ENSG00000039600	SOX30	0.116898	YES	NO
ENSG00000039650	PNKP	0.0126866	NO	NO
ENSG00000039987	BEST2	0.0734087	NO	NO
ENSG00000040199	PHLPP2	0.0159452	NO	NO
ENSG00000040275	SPDL1	0.01614	NO	NO
ENSG00000040341	STAU2	0.0750647	NO	NO
ENSG00000040487	PQLC2	0.0174509	NO	NO
ENSG00000040531	CTNS	0.00695756	NO	NO
ENSG00000040633	PHF23	0.0268591	NO	NO
ENSG00000040731	CDH10	0.146218	YES	NO
ENSG00000040933	INPP4A	0.0101745	NO	NO
ENSG00000041357	PSMA4	0.0215596	NO	NO
ENSG00000041515	MYO16	0.12726	YES	NO
ENSG00000041802	LSG1	0.0140091	NO	NO
ENSG00000041880	PARP3	0.0117708	NO	NO
ENSG00000041982	TNC	0.0459004	NO	NO
ENSG00000041988	THAP3	0.0311022	NO	NO
ENSG00000042088	TDP1	0.0876256	NO	NO
ENSG00000042286	AIFM2	0.0343109	NO	NO
ENSG00000042304	C2ORF83	0.0509335	NO	NO
ENSG00000042317	SPATA7	0.0151584	NO	NO
ENSG00000042429	MED17	0.009445	NO	NO
ENSG00000042445	RETSAT	0.0131165	NO	NO
ENSG00000042753	AP2S1	0.0262095	NO	NO
ENSG00000042781	USH2A	0.150842	YES	NO
ENSG00000042832	TG	0.127883	YES	NO
ENSG00000042980	ADAM28	0.124269	YES	NO
ENSG00000043039	BARX2	0.0546455	NO	NO
ENSG00000043143	JADE2	0.0120767	NO	NO
ENSG00000043355	ZIC2	0.107231	YES	NO
ENSG00000043462	LCP2	0.100212	NO	NO
ENSG00000043514	TRIT1	0.0496942	NO	NO
ENSG00000043591	ADRB1	0.0497805	NO	NO
ENSG00000044012	GUCA2B	0.0822287	NO	NO
ENSG00000044090	CUL7	0.0482259	NO	NO
ENSG00000044115	CTNNA1	0.152354	YES	NO
ENSG00000044459	CNTLN	0.0840055	NO	NO
ENSG00000044524	EPHA3	0.0828955	NO	NO
ENSG00000044574	HSPA5	0.0306104	NO	NO
ENSG00000046604	DSG2	0.03861	NO	NO
ENSG00000046889	PREX2	0.159086	YES	NO
ENSG00000047056	WDR37	0.00684496	NO	NO
ENSG00000047188	YTHDC2	0.0253939	NO	NO
ENSG00000047249	ATP6V1H	0.0105496	NO	NO
ENSG00000047315	POLR2B	0.0101952	NO	NO
ENSG00000047365	ARAP2	0.0298189	NO	NO
ENSG00000047410	TPR	0.00831259	NO	NO
ENSG00000047457	CP	0.121154	YES	NO
ENSG00000047578	KIAA0556	0.00544909	NO	NO
ENSG00000047579	DTNBP1	0.0192245	NO	NO
ENSG00000047617	ANO2	0.121349	YES	NO
ENSG00000047621	C12ORF4	0.0137346	NO	NO
ENSG00000047662	FAM184B	0.0961142	NO	NO
ENSG00000047849	MAP4	0.0103361	NO	NO
ENSG00000047932	GOPC	0.0344129	NO	NO
ENSG00000047936	ROS1	0.114272	YES	YES	3.412	3.412	3.412	3.412
ENSG00000048028	USP28	0.0257648	NO	NO
ENSG00000048052	HDAC9	0.0719624	NO	NO
ENSG00000048140	TSPAN17	0.0130162	NO	NO
ENSG00000048162	NOP16	0.0156354	NO	NO
ENSG00000048342	CC2D2A	0.0893676	NO	NO
ENSG00000048392	RRM2B	0.0101602	NO	NO
ENSG00000048462	TNFRSF17	0.0646426	NO	NO
ENSG00000048471	SNX29	0.0191739	NO	NO
ENSG00000048540	LMO3	0.152451	YES	YES	4.21	4.21	4.21	4.21
ENSG00000048544	MRPS10	0.0148701	NO	NO
ENSG00000048649	RSF1	0.0183703	NO	NO
ENSG00000048707	VPS13D	0.0402184	NO	NO
ENSG00000048740	CELF2	0.120194	YES	NO
ENSG00000048828	FAM120A	0.00807974	NO	NO
ENSG00000048991	R3HDM1	0.01168	NO	NO
ENSG00000049089	COL9A2	0.110611	YES	NO
ENSG00000049167	ERCC8	0.0169361	NO	NO
ENSG00000049192	ADAMTS6	0.0109689	NO	NO
ENSG00000049239	H6PD	0.0317188	NO	NO
ENSG00000049245	VAMP3	0.00973746	NO	NO
ENSG00000049246	PER3	0.0336377	NO	NO
ENSG00000049247	UTS2	0.0858776	NO	NO
ENSG00000049249	TNFRSF9	0.0778713	NO	NO
ENSG00000049283	EPN3	0.0507617	NO	NO
ENSG00000049319		0.0953714	NO	NO
ENSG00000049323	LTBP1	0.0844181	NO	NO
ENSG00000049449	RCN1	0.103307	NO	NO
ENSG00000049540	ELN	0.0945498	NO	NO
ENSG00000049541	RFC2	0.00773902	NO	NO
ENSG00000049618	ARID1B	0.0110861	NO	NO
ENSG00000049656	CLPTM1L	0.0495179	NO	NO
ENSG00000049759	NEDD4L	0.0149103	NO	NO
ENSG00000049860	HEXB	0.0730225	NO	NO
ENSG00000049883	PTCD2	0.00704076	NO	NO
ENSG00000050130	JKAMP	0.00966244	NO	NO
ENSG00000050165	DKK3	0.127601	YES	NO
ENSG00000050327	ARHGEF5	0.085166	NO	NO
ENSG00000050344	NFE2L3	0.0495573	NO	NO
ENSG00000050393	MCUR1	0.0245399	NO	NO
ENSG00000050405	LIMA1	0.0188097	NO	NO
ENSG00000050426	LETMD1	0.0174208	NO	NO
ENSG00000050438	SLC4A8	0.0547119	NO	NO
ENSG00000050555	LAMC3	0.0850404	NO	NO
ENSG00000050748	MAPK9	0.0135178	NO	NO
ENSG00000050767	COL23A1	0.128848	YES	NO
ENSG00000050820	BCAR1	0.0503348	NO	NO
ENSG00000051009	FAM160A2	0.0101396	NO	NO
ENSG00000051108	HERPUD1	0.0335622	NO	NO
ENSG00000051128	HOMER3	0.0415022	NO	NO
ENSG00000051180	RAD51	0.0077183	NO	NO
ENSG00000051341		0.00920485	NO	NO
ENSG00000051382	PIK3CB	0.0250269	NO	NO
ENSG00000051523	CYBA	0.191146	YES	NO
ENSG00000051620	HEBP2	0.0432673	NO	NO
ENSG00000052126	PLEKHA5	0.023921	NO	NO
ENSG00000052344	PRSS8	0.0787244	NO	NO
ENSG00000052723	SIKE1	0.0117123	NO	NO
ENSG00000052749	RRP12	0.0225249	NO	NO
ENSG00000052795	FNIP2	0.0417922	NO	NO
ENSG00000052802	MSMO1	0.00801309	NO	NO
ENSG00000052841	TTC17	0.0321005	NO	NO
ENSG00000052850	ALX4	0.101886	NO	NO
ENSG00000053108	FSTL4	0.0498554	NO	NO
ENSG00000053254	FOXN3	0.112955	YES	YES	-1.997	-1.997	-1.997	-1.997
ENSG00000053328	METTL24	0.128812	YES	NO
ENSG00000053371	AKR7A2	0.0213973	NO	NO
ENSG00000053372	MRTO4	0.0088405	NO	NO
ENSG00000053438	NNAT	0.0500551	NO	NO
ENSG00000053501		0.00880658	NO	NO
ENSG00000053524	MCF2L2	0.0729575	NO	NO
ENSG00000053702	NRIP2	0.183167	YES	NO
ENSG00000053747		0.0325681	NO	NO
ENSG00000053770	AP5M1	0.00939966	NO	NO
ENSG00000053900	ANAPC4	0.0221279	NO	NO
ENSG00000053918	KCNQ1	0.0802195	NO	NO
ENSG00000054116	TRAPPC3	0.0351066	NO	NO
ENSG00000054118	THRAP3	0.0127301	NO	NO
ENSG00000054148	PHPT1	0.0228629	NO	NO
ENSG00000054179	ENTPD2	0.0534613	NO	NO
ENSG00000054219	LY75	0.100037	NO	NO
ENSG00000054267	ARID4B	0.0102217	NO	NO
ENSG00000054282	SDCCAG8	0.00826704	NO	NO
ENSG00000054356	PTPRN	0.124506	YES	NO
ENSG00000054392	HHAT	0.0567452	NO	NO
ENSG00000054523	KIF1B	0.00609986	NO	NO
ENSG00000054598	FOXC1	0.0309321	NO	NO
ENSG00000054611	TBC1D22A	0.00716218	NO	NO
ENSG00000054654	SYNE2	0.0423827	NO	NO
ENSG00000054690	PLEKHH1	0.0412304	NO	NO
ENSG00000054793	ATP9A	0.0402515	NO	NO
ENSG00000054796	SPO11	0.0832392	NO	NO
ENSG00000054803	CBLN4	0.0950149	NO	NO
ENSG00000054938	CHRDL2	0.117951	YES	YES	-2.395	-2.395	-2.395	-2.395
ENSG00000054965	FAM168A	0.00919117	NO	NO
ENSG00000054967	RELT	0.0236671	NO	NO
ENSG00000054983	GALC	0.039584	NO	NO
ENSG00000055044	NOP58	0.0118981	NO	NO
ENSG00000055070	SZRD1	0.0155367	NO	NO
ENSG00000055118	KCNH2	0.0995894	NO	NO
ENSG00000055130	CUL1	0.109932	YES	YES	-3.751	-3.751	-3.751	-3.751
ENSG00000055147	FAM114A2	0.00793494	NO	NO
ENSG00000055163	CYFIP2	0.0403181	NO	NO
ENSG00000055211	GINM1	0.00861933	NO	NO
ENSG00000055332	EIF2AK2	0.0275419	NO	NO
ENSG00000055483	USP36	0.0258731	NO	NO
ENSG00000055732	MCOLN3	0.0546985	NO	NO
ENSG00000055813	CCDC85A	0.0459413	NO	NO
ENSG00000055917	PUM2	0.0942318	NO	NO
ENSG00000055950	MRPL43	0.0106114	NO	NO
ENSG00000055955	ITIH4	0.116271	YES	NO
ENSG00000055957	ITIH1	0.0522647	NO	NO
ENSG00000056050	C4ORF27	0.0208197	NO	NO
ENSG00000056097	ZFR	0.0680182	NO	NO
ENSG00000056291	NPFFR2	0.115197	YES	NO
ENSG00000056487	PHF21B	0.140561	YES	NO
ENSG00000056558	TRAF1	0.0732084	NO	NO
ENSG00000056586	RC3H2	0.0220259	NO	NO
ENSG00000056661		0.0160525	NO	NO
ENSG00000056736	IL17RB	0.0477231	NO	NO
ENSG00000056972	TRAF3IP2	0.0250892	NO	NO
ENSG00000057019	DCBLD2	0.0242479	NO	NO
ENSG00000057149	SERPINB3	0.102497	NO	NO
ENSG00000057252	SOAT1	0.00889045	NO	NO
ENSG00000057294	PKP2	0.0442499	NO	NO
ENSG00000057468	MSH4	0.110166	YES	NO
ENSG00000057593	F7	0.115065	YES	NO
ENSG00000057608	GDI2	0.038391	NO	NO
ENSG00000057657	PRDM1	0.0100512	NO	NO
ENSG00000057663	ATG5	0.0281317	NO	NO
ENSG00000057704	TMCC3	0.0656467	NO	NO
ENSG00000057757	PITHD1	0.00723729	NO	NO
ENSG00000057935	MTA3	0.0303239	NO	NO
ENSG00000058056	USP13	0.00813147	NO	NO
ENSG00000058063	ATP11B	0.0104394	NO	NO
ENSG00000058085	LAMC2	0.0563456	NO	NO
ENSG00000058091	CDK14	0.0855396	NO	NO
ENSG00000058262	SEC61A1	0.0180678	NO	NO
ENSG00000058272	PPP1R12A	0.00974715	NO	NO
ENSG00000058335	RASGRF1	0.0943975	NO	NO
ENSG00000058600	POLR3E	0.00766351	NO	NO
ENSG00000058668	ATP2B4	0.051053	NO	NO
ENSG00000058673	ZC3H11A	0.0200523	NO	NO
ENSG00000058799	YIPF1	0.124459	YES	NO
ENSG00000058804	NDC1	0.0355806	NO	NO
ENSG00000058866	DGKG	0.112774	YES	NO
ENSG00000059122	FLYWCH1	0.0241943	NO	NO
ENSG00000059145	UNKL	0.0430825	NO	NO
ENSG00000059377	TBXAS1	0.0153147	NO	NO
ENSG00000059378	PARP12	0.128466	YES	NO
ENSG00000059573	ALDH18A1	0.00745878	NO	NO
ENSG00000059588	TARBP1	0.0277162	NO	NO
ENSG00000059691	GATB	0.0130966	NO	NO
ENSG00000059758	CDK17	0.00918248	NO	NO
ENSG00000059804	SLC2A3	0.110554	YES	YES	-1.92	-1.92	-1.92	-1.92
ENSG00000059915	PSD	0.0251305	NO	NO
ENSG00000060069	CTDP1	0.0197088	NO	NO
ENSG00000060138	YBX3	0.0138183	NO	NO
ENSG00000060140	STYK1	0.0259972	NO	NO
ENSG00000060237	WNK1	0.00532378	NO	NO
ENSG00000060339	CCAR1	0.0172647	NO	NO
ENSG00000060491	OGFR	0.0182529	NO	NO
ENSG00000060558	GNA15	0.0464369	NO	NO
ENSG00000060566	CREB3L3	0.100373	NO	NO
ENSG00000060642	PIGV	0.04388	NO	NO
ENSG00000060656	PTPRU	0.0109345	NO	NO
ENSG00000060718	COL11A1	0.117593	YES	NO
ENSG00000060749	QSER1	0.00650939	NO	NO
ENSG00000060762	MPC1	0.00936661	NO	NO
ENSG00000060971	ACAA1	0.0162358	NO	NO
ENSG00000060982	BCAT1	0.0926748	NO	NO
ENSG00000061337	LZTS1	0.0838702	NO	NO
ENSG00000061455	PRDM6	0.106522	YES	NO
ENSG00000061492	WNT8A	0.0512286	NO	NO
ENSG00000061656	SPAG4	0.0316368	NO	NO
ENSG00000061676	NCKAP1	0.0149033	NO	NO
ENSG00000061794		0.00646625	NO	NO
ENSG00000061918	GUCY1B3	0.0632783	NO	NO
ENSG00000061936	SFSWAP	0.0194163	NO	NO
ENSG00000061987	MON2	0.00806211	NO	NO
ENSG00000062194	GPBP1	0.00914056	NO	NO
ENSG00000062485	CS	0.0319803	NO	NO
ENSG00000062524	LTK	0.110856	YES	NO
ENSG00000062582	MRPS24	0.0126502	NO	NO
ENSG00000062650		0.00713472	NO	NO
ENSG00000062716	VMP1	0.0138149	NO	NO
ENSG00000062725	APPBP2	0.00649541	NO	NO
ENSG00000062822	POLD1	0.0192794	NO	NO
ENSG00000063015	SEZ6	0.102684	NO	NO
ENSG00000063046	EIF4B	0.0332953	NO	NO
ENSG00000063127	SLC6A16	0.0496568	NO	NO
ENSG00000063169	GLTSCR1	0.0308115	NO	NO
ENSG00000063176	SPHK2	0.00610999	NO	NO
ENSG00000063177	RPL18	0.00624622	NO	NO
ENSG00000063180		0.00659494	NO	NO
ENSG00000063241	ISOC2	0.0530664	NO	NO
ENSG00000063244	U2AF2	0.0202832	NO	NO
ENSG00000063245	EPN1	0.0283327	NO	NO
ENSG00000063322	MED29	0.0112715	NO	NO
ENSG00000063438	AHRR	0.0609315	NO	NO
ENSG00000063515	GSC2	0.140956	YES	NO
ENSG00000063660	GPC1	0.0350905	NO	NO
ENSG00000063761	ADCK1	0.00933855	NO	NO
ENSG00000063854	HAGH	0.0128844	NO	NO
ENSG00000063978	RNF4	0.0633148	NO	NO
ENSG00000064012	CASP8	0.0454868	NO	NO
ENSG00000064042	LIMCH1	0.121493	YES	NO
ENSG00000064102	ASUN	0.00664338	NO	NO
ENSG00000064115	TM7SF3	0.0107032	NO	NO
ENSG00000064195	DLX3	0.0394543	NO	NO
ENSG00000064199	SPA17	0.0239096	NO	NO
ENSG00000064201	TSPAN32	0.112735	YES	YES	-1.914	-1.914	-1.914	-1.914
ENSG00000064205	WISP2	0.0835245	NO	NO
ENSG00000064218	DMRT3	0.11866	YES	NO
ENSG00000064225	ST3GAL6	0.0405111	NO	NO
ENSG00000064270	ATP2C2	0.0518453	NO	NO
ENSG00000064300	NGFR	0.092744	NO	NO
ENSG00000064309	CDON	0.0317417	NO	NO
ENSG00000064313	TAF2	0.0139685	NO	NO
ENSG00000064393	HIPK2	0.00819869	NO	NO
ENSG00000064419	TNPO3	0.0133608	NO	NO
ENSG00000064489		0.00729784	NO	NO
ENSG00000064490	RFXANK	0.016164	NO	NO
ENSG00000064545	TMEM161A	0.0137629	NO	NO
ENSG00000064547	LPAR2	0.020764	NO	NO
ENSG00000064601	CTSA	0.107334	YES	NO
ENSG00000064607	SUGP2	0.00740304	NO	NO
ENSG00000064651	SLC12A2	0.00684505	NO	NO
ENSG00000064655	EYA2	0.119182	YES	NO
ENSG00000064666	CNN2	0.0212306	NO	NO
ENSG00000064687	ABCA7	0.00668251	NO	NO
ENSG00000064692	SNCAIP	0.0900506	NO	NO
ENSG00000064703	DDX20	0.0129053	NO	NO
ENSG00000064726	BTBD1	0.0122374	NO	NO
ENSG00000064763	FAR2	0.170879	YES	YES	-2.168	-2.168	-2.168	-2.168
ENSG00000064787	BCAS1	0.0637115	NO	NO
ENSG00000064835	POU1F1	0.0744744	NO	NO
ENSG00000064886	CHI3L2	0.138679	YES	NO
ENSG00000064932	SBNO2	0.0308997	NO	NO
ENSG00000064933	PMS1	0.00692703	NO	NO
ENSG00000064961	HMG20B	0.00758019	NO	NO
ENSG00000064989	CALCRL	0.172328	YES	NO
ENSG00000064995	TAF11	0.00725509	NO	NO
ENSG00000064999	ANKS1A	0.00728777	NO	NO
ENSG00000065000	AP3D1	0.00922456	NO	NO
ENSG00000065029	ZNF76	0.0589285	NO	NO
ENSG00000065054	SLC9A3R2	0.0415519	NO	NO
ENSG00000065057	NTHL1	0.0199271	NO	NO
ENSG00000065060	UHRF1BP1	0.0172196	NO	NO
ENSG00000065135	GNAI3	0.00802825	NO	NO
ENSG00000065150	IPO5	0.0767095	NO	NO
ENSG00000065154	OAT	0.0141596	NO	NO
ENSG00000065183	WDR3	0.00800205	NO	NO
ENSG00000065243	PKN2	0.0065079	NO	NO
ENSG00000065268	WDR18	0.0109315	NO	NO
ENSG00000065308	TRAM2	0.0323147	NO	NO
ENSG00000065320	NTN1	0.0399529	NO	NO
ENSG00000065325	GLP2R	0.102182	NO	NO
ENSG00000065328	MCM10	0.0109414	NO	NO
ENSG00000065357	DGKA	0.00685278	NO	NO
ENSG00000065361	ERBB3	0.0148261	NO	NO
ENSG00000065371	ROPN1	0.100303	NO	NO
ENSG00000065413	ANKRD44	0.0231007	NO	NO
ENSG00000065427	KARS	0.010958	NO	NO
ENSG00000065457	ADAT1	0.00881422	NO	NO
ENSG00000065485	PDIA5	0.0290514	NO	NO
ENSG00000065491	TBC1D22B	0.0162894	NO	NO
ENSG00000065518	NDUFB4	0.013871	NO	NO
ENSG00000065526	SPEN	0.00784235	NO	NO
ENSG00000065534	MYLK	0.100073	NO	NO
ENSG00000065548	ZC3H15	0.00899698	NO	NO
ENSG00000065559	MAP2K4	0.015332	NO	NO
ENSG00000065600	TMEM206	0.0252678	NO	NO
ENSG00000065609	SNAP91	0.14713	YES	NO
ENSG00000065613		0.00594532	NO	NO
ENSG00000065615	CYB5R4	0.0211839	NO	NO
ENSG00000065618	COL17A1	0.0695886	NO	NO
ENSG00000065621	GSTO2	0.0559043	NO	NO
ENSG00000065665	SEC61A2	0.0192954	NO	NO
ENSG00000065717	TLE2	0.0226483	NO	NO
ENSG00000065802	ASB1	0.0488989	NO	NO
ENSG00000065809	FAM107B	0.0673139	NO	NO
ENSG00000065833		0.0627443	NO	NO
ENSG00000065882	TBC1D1	0.0619487	NO	NO
ENSG00000065883	CDK13	0.0087606	NO	NO
ENSG00000065911	MTHFD2	0.0555791	NO	NO
ENSG00000065970	FOXJ2	0.00846477	NO	NO
ENSG00000065978	YBX1	0.00719015	NO	NO
ENSG00000065989	PDE4A	0.0752993	NO	NO
ENSG00000066027	PPP2R5A	0.0179277	NO	NO
ENSG00000066032	CTNNA2	0.145873	YES	NO
ENSG00000066044	ELAVL1	0.0111027	NO	NO
ENSG00000066056	TIE1	0.0622602	NO	NO
ENSG00000066084	DIP2B	0.031187	NO	NO
ENSG00000066117	SMARCD1	0.010284	NO	NO
ENSG00000066135	KDM4A	0.0237088	NO	NO
ENSG00000066136	NFYC	0.0619953	NO	NO
ENSG00000066185	ZMYND12	0.0252959	NO	NO
ENSG00000066230	SLC9A3	0.133121	YES	NO
ENSG00000066248	NGEF	0.0930405	NO	NO
ENSG00000066279	ASPM	0.0342526	NO	NO
ENSG00000066294	CD84	0.186038	YES	NO
ENSG00000066322	ELOVL1	0.014364	NO	NO
ENSG00000066336	SPI1	0.0695003	NO	NO
ENSG00000066379	ZNRD1	0.0208665	NO	NO
ENSG00000066382	MPPED2	0.156644	YES	NO
ENSG00000066405	CLDN18	0.133633	YES	YES	-1.896	-1.896	-1.896	-1.896
ENSG00000066422	ZBTB11	0.0447092	NO	NO
ENSG00000066427	ATXN3	0.0152127	NO	NO
ENSG00000066455	GOLGA5	0.0200124	NO	NO
ENSG00000066468	FGFR2	0.057103	NO	NO
ENSG00000066557	LRRC40	0.0074077	NO	NO
ENSG00000066583	ISOC1	0.00602501	NO	NO
ENSG00000066629	EML1	0.0612831	NO	NO
ENSG00000066651	TRMT11	0.0251131	NO	NO
ENSG00000066654	THUMPD1	0.0456117	NO	NO
ENSG00000066697	MSANTD3	0.0184179	NO	NO
ENSG00000066735	KIF26A	0.0895144	NO	NO
ENSG00000066739	ATG2B	0.00790131	NO	NO
ENSG00000066777	ARFGEF1	0.00857694	NO	NO
ENSG00000066827	ZFAT	0.067373	NO	NO
ENSG00000066855	MTFR1	0.00816816	NO	NO
ENSG00000066923	STAG3	0.0705964	NO	NO
ENSG00000066926	FECH	0.0252775	NO	NO
ENSG00000066933	MYO9A	0.0342508	NO	NO
ENSG00000067057	PFKP	0.0442036	NO	NO
ENSG00000067064	IDI1	0.0072435	NO	NO
ENSG00000067066	SP100	0.03292	NO	NO
ENSG00000067082	KLF6	0.0146178	NO	NO
ENSG00000067113	PPAP2A	0.0102977	NO	NO
ENSG00000067141	NEO1	0.0295635	NO	NO
ENSG00000067167	TRAM1	0.0460176	NO	NO
ENSG00000067182	TNFRSF1A	0.0375451	NO	NO
ENSG00000067191	CACNB1	0.0138835	NO	NO
ENSG00000067208	EVI5	0.0876153	NO	NO
ENSG00000067221	STOML1	0.013419	NO	NO
ENSG00000067225	PKM	0.0237322	NO	NO
ENSG00000067248	DHX29	0.00622993	NO	NO
ENSG00000067334	DNTTIP2	0.0480655	NO	NO
ENSG00000067365	METTL22	0.031069	NO	NO
ENSG00000067369	TP53BP1	0.0184877	NO	NO
ENSG00000067533	RRP15	0.0257282	NO	NO
ENSG00000067560		0.0278201	NO	NO
ENSG00000067596	DHX8	0.00909687	NO	NO
ENSG00000067601		0.00811673	NO	NO
ENSG00000067606	PRKCZ	0.0379231	NO	NO
ENSG00000067704	IARS2	0.0179983	NO	NO
ENSG00000067715	SYT1	0.071152	NO	NO
ENSG00000067798	NAV3	0.193738	YES	NO
ENSG00000067836	ROGDI	0.0127318	NO	NO
ENSG00000067900	ROCK1	0.00568034	NO	NO
ENSG00000067955	CBFB	0.0288957	NO	NO
ENSG00000068001	HYAL2	0.0904932	NO	NO
ENSG00000068024	HDAC4	0.0157556	NO	NO
ENSG00000068028	RASSF1	0.172867	YES	NO
ENSG00000068078	FGFR3	0.0477194	NO	NO
ENSG00000068079	IFI35	0.0421646	NO	NO
ENSG00000068097	HEATR6	0.0254264	NO	NO
ENSG00000068120		0.0552083	NO	NO
ENSG00000068137	PLEKHH3	0.00482819	NO	NO
ENSG00000068305	MEF2A	0.122547	YES	NO
ENSG00000068383	INPP5A	0.0143042	NO	NO
ENSG00000068489	PRR11	0.00757828	NO	NO
ENSG00000068615	REEP1	0.0696852	NO	NO
ENSG00000068650	ATP11A	0.0275994	NO	NO
ENSG00000068654	POLR1A	0.00711803	NO	NO
ENSG00000068697	LAPTM4A	0.0141384	NO	NO
ENSG00000068724	TTC7A	0.00667207	NO	NO
ENSG00000068781		0.0504085	NO	NO
ENSG00000068784	SRBD1	0.105917	YES	NO
ENSG00000068793		0.0217607	NO	NO
ENSG00000068796	KIF2A	0.0332546	NO	NO
ENSG00000068831	RASGRP2	0.117508	YES	YES	-1.98	-1.98	-1.98	-1.98
ENSG00000068878	PSME4	0.00675762	NO	NO
ENSG00000068885	IFT80	0.00904124	NO	NO
ENSG00000068903	SIRT2	0.00885112	NO	NO
ENSG00000068912	ERLEC1	0.0123247	NO	NO
ENSG00000068971	PPP2R5B	0.00766553	NO	NO
ENSG00000068976	PYGM	0.0685856	NO	NO
ENSG00000069011	PITX1	0.0458617	NO	NO
ENSG00000069020	MAST4	0.0333102	NO	NO
ENSG00000069122		0.108731	YES	NO
ENSG00000069188	SDK2	0.140164	YES	NO
ENSG00000069206	ADAM7	0.130367	YES	NO
ENSG00000069248	NUP133	0.0229985	NO	NO
ENSG00000069275	NUCKS1	0.0181964	NO	NO
ENSG00000069329	VPS35	0.0101181	NO	NO
ENSG00000069345	DNAJA2	0.0162026	NO	NO
ENSG00000069399	BCL3	0.00935011	NO	NO
ENSG00000069424	KCNAB2	0.0230838	NO	NO
ENSG00000069431	ABCC9	0.160161	YES	NO
ENSG00000069482	GAL	0.125975	YES	NO
ENSG00000069667	RORA	0.099409	NO	NO
ENSG00000069696	DRD4	0.154168	YES	NO
ENSG00000069712	KIAA1107	0.0303987	NO	NO
ENSG00000069812	HES2	0.0684832	NO	NO
ENSG00000069849	ATP1B3	0.00845475	NO	NO
ENSG00000069869	NEDD4	0.0240828	NO	NO
ENSG00000069943	PIGB	0.0342375	NO	NO
ENSG00000069966	GNB5	0.0353049	NO	NO
ENSG00000069998	CECR5	0.0936158	NO	NO
ENSG00000070010	UFD1L	0.0107003	NO	NO
ENSG00000070018	LRP6	0.0252173	NO	NO
ENSG00000070019	GUCY2C	0.114622	YES	NO
ENSG00000070031	SCT	0.0734431	NO	NO
ENSG00000070047	PHRF1	0.00782943	NO	NO
ENSG00000070061	IKBKAP	0.0210416	NO	NO
ENSG00000070081	NUCB2	0.00628885	NO	NO
ENSG00000070159	PTPN3	0.0871986	NO	NO
ENSG00000070182	SPTB	0.0159937	NO	NO
ENSG00000070190	DAPP1	0.11527	YES	NO
ENSG00000070193	FGF10	0.141205	YES	NO
ENSG00000070214	SLC44A1	0.0107289	NO	NO
ENSG00000070366	SMG6	0.00620348	NO	NO
ENSG00000070367	EXOC5	0.00888676	NO	NO
ENSG00000070371	CLTCL1	0.0262679	NO	NO
ENSG00000070388	FGF22	0.0625609	NO	NO
ENSG00000070404	FSTL3	0.0539884	NO	NO
ENSG00000070413	DGCR2	0.0179061	NO	NO
ENSG00000070423	RNF126	0.0195525	NO	NO
ENSG00000070444	MNT	0.0223832	NO	NO
ENSG00000070476	ZXDC	0.0222561	NO	NO
ENSG00000070495	JMJD6	0.00998896	NO	NO
ENSG00000070501	POLB	0.00732507	NO	NO
ENSG00000070526	ST6GALNAC1	0.14455	YES	YES	2.527	2.527	2.527	2.527
ENSG00000070540	WIPI1	0.00741813	NO	NO
ENSG00000070601	FRMPD1	0.0728662	NO	NO
ENSG00000070610	GBA2	0.0401715	NO	NO
ENSG00000070614	NDST1	0.0324037	NO	NO
ENSG00000070669	ASNS	0.0264918	NO	NO
ENSG00000070718	AP3M2	0.0457238	NO	NO
ENSG00000070729	CNGB1	0.0721282	NO	NO
ENSG00000070731	ST6GALNAC2	0.0879914	NO	NO
ENSG00000070748	CHAT	0.101874	NO	NO
ENSG00000070756	PABPC1	0.0351946	NO	NO
ENSG00000070759	TESK2	0.0169674	NO	NO
ENSG00000070770	CSNK2A2	0.0104394	NO	NO
ENSG00000070778	PTPN21	0.00863091	NO	NO
ENSG00000070785	EIF2B3	0.0392494	NO	NO
ENSG00000070808	CAMK2A	0.0925433	NO	NO
ENSG00000070814	TCOF1	0.0333743	NO	NO
ENSG00000070831	CDC42	0.0448798	NO	NO
ENSG00000070882	OSBPL3	0.0617955	NO	NO
ENSG00000070886	EPHA8	0.126617	YES	NO
ENSG00000070915	SLC12A3	0.0579928	NO	NO
ENSG00000070950	RAD18	0.0180511	NO	NO
ENSG00000070961	ATP2B1	0.00867823	NO	NO
ENSG00000070985	TRPM5	0.101102	NO	NO
ENSG00000071051	NCK2	0.0436674	NO	NO
ENSG00000071054	MAP4K4	0.0564039	NO	NO
ENSG00000071073	MGAT4A	0.0149446	NO	NO
ENSG00000071082	RPL31	0.0372017	NO	NO
ENSG00000071127	WDR1	0.0402498	NO	NO
ENSG00000071189	SNX13	0.010959	NO	NO
ENSG00000071203	MS4A12	0.0559807	NO	NO
ENSG00000071205		0.0582406	NO	NO
ENSG00000071243	ING3	0.0102693	NO	NO
ENSG00000071246	VASH1	0.137098	YES	NO
ENSG00000071282	LMCD1	0.0175488	NO	NO
ENSG00000071462	WBSCR22	0.0122951	NO	NO
ENSG00000071537	SEL1L	0.0153842	NO	NO
ENSG00000071539	TRIP13	0.0244453	NO	NO
ENSG00000071564		0.00605557	NO	NO
ENSG00000071575	TRIB2	0.0793513	NO	NO
ENSG00000071626	DAZAP1	0.0205952	NO	NO
ENSG00000071655	MBD3	0.0307826	NO	NO
ENSG00000071677	PRLH	0.057226	NO	NO
ENSG00000071794	HLTF	0.0598514	NO	NO
ENSG00000071909	MYO3B	0.0882735	NO	NO
ENSG00000071967	CYBRD1	0.0528681	NO	NO
ENSG00000071991	CDH19	0.0955115	NO	NO
ENSG00000071994	PDCD2	0.00730681	NO	NO
ENSG00000072041	SLC6A15	0.175627	YES	YES	-2.444	-2.444	-2.444	-2.444
ENSG00000072042	RDH11	0.0226913	NO	NO
ENSG00000072071		0.012735	NO	NO
ENSG00000072080		0.104318	YES	NO
ENSG00000072110	ACTN1	0.0132511	NO	NO
ENSG00000072121	ZFYVE26	0.0111277	NO	NO
ENSG00000072135	PTPN18	0.0190584	NO	NO
ENSG00000072163	LIMS2	0.0619667	NO	NO
ENSG00000072182	ASIC4	0.110036	YES	NO
ENSG00000072195	SPEG	0.132388	YES	NO
ENSG00000072201	LNX1	0.0525229	NO	NO
ENSG00000072210	ALDH3A2	0.0286794	NO	NO
ENSG00000072274	TFRC	0.00686829	NO	NO
ENSG00000072310	SREBF1	0.0332029	NO	NO
ENSG00000072364	AFF4	0.00998885	NO	NO
ENSG00000072401	UBE2D1	0.0193014	NO	NO
ENSG00000072415	MPP5	0.00556435	NO	NO
ENSG00000072422	RHOBTB1	0.0892632	NO	NO
ENSG00000072518	MARK2	0.0127669	NO	NO
ENSG00000072571	HMMR	0.00709242	NO	NO
ENSG00000072682	P4HA2	0.0676162	NO	NO
ENSG00000072736	NFATC3	0.0616478	NO	NO
ENSG00000072756	TRNT1	0.0133484	NO	NO
ENSG00000072778	ACADVL	0.102126	NO	NO
ENSG00000072786	STK10	0.036229	NO	NO
ENSG00000072803	FBXW11	0.00952255	NO	NO
ENSG00000072818	ACAP1	0.104873	YES	YES	-2.154	-2.154	-2.154	-2.154
ENSG00000072832	CRMP1	0.140081	YES	NO
ENSG00000072840	EVC	0.0521783	NO	NO
ENSG00000072849	DERL2	0.0165283	NO	NO
ENSG00000072858	SIDT1	0.0393835	NO	NO
ENSG00000072952	MRVI1	0.0732849	NO	NO
ENSG00000072954	TMEM38A	0.0104214	NO	NO
ENSG00000072958	AP1M1	0.0168585	NO	NO
ENSG00000073008	PVR	0.0234212	NO	NO
ENSG00000073067	CYP2W1	0.0870106	NO	NO
ENSG00000073111		0.0128042	NO	NO
ENSG00000073146	MOV10L1	0.0874495	NO	NO
ENSG00000073150	PANX2	0.0403067	NO	NO
ENSG00000073169		0.0115098	NO	NO
ENSG00000073282	TP63	0.139441	YES	NO
ENSG00000073331	ALPK1	0.00490322	NO	NO
ENSG00000073350	LLGL2	0.0350823	NO	NO
ENSG00000073417	PDE8A	0.0786166	NO	NO
ENSG00000073536	NLE1	0.0193647	NO	NO
ENSG00000073578	SDHA	0.042959	NO	NO
ENSG00000073584	SMARCE1	0.0170018	NO	NO
ENSG00000073598	FNDC8	0.0348464	NO	NO
ENSG00000073605	GSDMB	0.0298523	NO	NO
ENSG00000073614	KDM5A	0.0184512	NO	NO
ENSG00000073670	ADAM11	0.0836552	NO	NO
ENSG00000073711	PPP2R3A	0.0604745	NO	NO
ENSG00000073712	FERMT2	0.0942107	NO	NO
ENSG00000073734	ABCB11	0.119212	YES	NO
ENSG00000073737	DHRS9	0.0869097	NO	NO
ENSG00000073756	PTGS2	0.064638	NO	NO
ENSG00000073792	IGF2BP2	0.0564835	NO	NO
ENSG00000073803	MAP3K13	0.0447493	NO	NO
ENSG00000073849	ST6GAL1	0.046205	NO	NO
ENSG00000073861	TBX21	0.129924	YES	YES	-1.859	-1.859	-1.859	-1.859
ENSG00000073910	FRY	0.0859774	NO	NO
ENSG00000073921	PICALM	0.0903547	NO	NO
ENSG00000074047	GLI2	0.0426856	NO	NO
ENSG00000074054	CLASP1	0.0133359	NO	NO
ENSG00000074071	MRPS34	0.00808782	NO	NO
ENSG00000074181	NOTCH3	0.0530144	NO	NO
ENSG00000074201	CLNS1A	0.0117215	NO	NO
ENSG00000074211	PPP2R2C	0.0990324	NO	NO
ENSG00000074219	TEAD2	0.0276064	NO	NO
ENSG00000074266	EED	0.00949333	NO	NO
ENSG00000074276	CDHR2	0.116419	YES	YES	-2.67	-2.67	-2.67	-2.67
ENSG00000074317	SNCB	0.141475	YES	NO
ENSG00000074319	TSG101	0.0136252	NO	NO
ENSG00000074356		0.00886285	NO	NO
ENSG00000074370	ATP2A3	0.0471597	NO	NO
ENSG00000074410	CA12	0.0473626	NO	NO
ENSG00000074416	MGLL	0.0293085	NO	NO
ENSG00000074527		0.0252491	NO	NO
ENSG00000074582	BCS1L	0.0225304	NO	NO
ENSG00000074590		0.141708	YES	NO
ENSG00000074603	DPP8	0.0126412	NO	NO
ENSG00000074621	SLC24A1	0.0139093	NO	NO
ENSG00000074657	ZNF532	0.0901263	NO	NO
ENSG00000074660	SCARF1	0.0825477	NO	NO
ENSG00000074695	LMAN1	0.0229985	NO	NO
ENSG00000074696		0.0223774	NO	NO
ENSG00000074706	IPCEF1	0.0829228	NO	NO
ENSG00000074755	ZZEF1	0.0107282	NO	NO
ENSG00000074771	NOX3	0.0933846	NO	NO
ENSG00000074800	ENO1	0.0198963	NO	NO
ENSG00000074803	SLC12A1	0.097359	NO	NO
ENSG00000074842	MYDGF	0.0205276	NO	NO
ENSG00000074855	ANO8	0.0293441	NO	NO
ENSG00000074964	ARHGEF10L	0.0613006	NO	NO
ENSG00000074966	TXK	0.0412737	NO	NO
ENSG00000075035	WSCD2	0.167874	YES	YES	-2.054	-2.054	-2.054	-2.054
ENSG00000075043	KCNQ2	0.0940123	NO	NO
ENSG00000075073	TACR2	0.0618579	NO	NO
ENSG00000075089	ACTR6	0.0694138	NO	NO
ENSG00000075131	TIPIN	0.0148004	NO	NO
ENSG00000075142	SRI	0.0741408	NO	NO
ENSG00000075218	GTSE1	0.0108695	NO	NO
ENSG00000075223	SEMA3C	0.139915	YES	NO
ENSG00000075234	TTC38	0.0150163	NO	NO
ENSG00000075239	ACAT1	0.00624975	NO	NO
ENSG00000075240	GRAMD4	0.136389	YES	NO
ENSG00000075275	CELSR1	0.0283596	NO	NO
ENSG00000075290	WNT8B	0.0598669	NO	NO
ENSG00000075292	ZNF638	0.187025	YES	NO
ENSG00000075303	SLC25A40	0.0098189	NO	NO
ENSG00000075336	TIMM21	0.00640058	NO	NO
ENSG00000075340	ADD2	0.147485	YES	NO
ENSG00000075388	FGF4	0.126953	YES	NO
ENSG00000075391	RASAL2	0.0248935	NO	NO
ENSG00000075399	VPS9D1	0.00875999	NO	NO
ENSG00000075407	ZNF37A	0.0272767	NO	NO
ENSG00000075413	MARK3	0.0235002	NO	NO
ENSG00000075415	SLC25A3	0.0304224	NO	NO
ENSG00000075420	FNDC3B	0.0186466	NO	NO
ENSG00000075426	FOSL2	0.0110632	NO	NO
ENSG00000075429	CACNG5	0.110286	YES	NO
ENSG00000075461	CACNG4	0.114065	YES	NO
ENSG00000075539	FRYL	0.00937489	NO	NO
ENSG00000075568	TMEM131	0.0130179	NO	NO
ENSG00000075618	FSCN1	0.080598	NO	NO
ENSG00000075624	ACTB	0.0433619	NO	NO
ENSG00000075643	MOCOS	0.0267979	NO	NO
ENSG00000075651		0.08178	NO	NO
ENSG00000075673	ATP12A	0.0483954	NO	NO
ENSG00000075702	WDR62	0.00835889	NO	NO
ENSG00000075711		0.0217693	NO	NO
ENSG00000075785	RAB7A	0.0181681	NO	NO
ENSG00000075790	BCAP29	0.0217541	NO	NO
ENSG00000075856	SART3	0.0102547	NO	NO
ENSG00000075886	TUBA3D	0.0193512	NO	NO
ENSG00000075891	PAX2	0.109943	YES	NO
ENSG00000075914	EXOSC7	0.00753594	NO	NO
ENSG00000075975	MKRN2	0.0262396	NO	NO
ENSG00000076003	MCM6	0.0212267	NO	NO
ENSG00000076043	REXO2	0.022544	NO	NO
ENSG00000076053	RBM7	0.00939325	NO	NO
ENSG00000076067	RBMS2	0.0303536	NO	NO
ENSG00000076108	BAZ2A	0.00881872	NO	NO
ENSG00000076201	PTPN23	0.0145527	NO	NO
ENSG00000076242	MLH1	0.0264159	NO	NO
ENSG00000076248	UNG	0.0292962	NO	NO
ENSG00000076258	FMO4	0.0345063	NO	NO
ENSG00000076321	KLHL20	0.0175877	NO	NO
ENSG00000076344	RGS11	0.0612128	NO	NO
ENSG00000076351	SLC46A1	0.0373671	NO	NO
ENSG00000076356	PLXNA2	0.0206873	NO	NO
ENSG00000076382	SPAG5	0.0123361	NO	NO
ENSG00000076513	ANKRD13A	0.0115583	NO	NO
ENSG00000076554	TPD52	0.0636043	NO	NO
ENSG00000076555	ACACB	0.127328	YES	NO
ENSG00000076604	TRAF4	0.0110794	NO	NO
ENSG00000076641	PAG1	0.0296252	NO	NO
ENSG00000076650	GPATCH1	0.0488069	NO	NO
ENSG00000076662	ICAM3	0.0644115	NO	NO
ENSG00000076685	NT5C2	0.029238	NO	NO
ENSG00000076706	MCAM	0.0614429	NO	NO
ENSG00000076826	CAMSAP3	0.0151716	NO	NO
ENSG00000076864	RAP1GAP	0.0567992	NO	NO
ENSG00000076928	ARHGEF1	0.113022	YES	YES	3.124	3.124	3.124	3.124
ENSG00000076944	STXBP2	0.0443434	NO	NO
ENSG00000076984	MAP2K7	0.0136679	NO	NO
ENSG00000077009	NMRK2	0.0908209	NO	NO
ENSG00000077063	CTTNBP2	0.0789746	NO	NO
ENSG00000077080	ACTL6B	0.125599	YES	YES	-1.948	-1.948	-1.948	-1.948
ENSG00000077092	RARB	0.0549174	NO	NO
ENSG00000077147	TM9SF3	0.0180704	NO	NO
ENSG00000077150	NFKB2	0.00691721	NO	NO
ENSG00000077152	UBE2T	0.0295111	NO	NO
ENSG00000077157	PPP1R12B	0.0153471	NO	NO
ENSG00000077232	DNAJC10	0.0147975	NO	NO
ENSG00000077238	IL4R	0.0233487	NO	NO
ENSG00000077254	USP33	0.0157245	NO	NO
ENSG00000077312	SNRPA	0.0334063	NO	NO
ENSG00000077327	SPAG6	0.141107	YES	NO
ENSG00000077348	EXOSC5	0.00958343	NO	NO
ENSG00000077380	DYNC1I2	0.0236319	NO	NO
ENSG00000077420	APBB1IP	0.11358	YES	NO
ENSG00000077454	LRCH4	0.0119872	NO	NO
ENSG00000077458	FAM76B	0.005196	NO	NO
ENSG00000077463	SIRT6	0.024715	NO	NO
ENSG00000077498	TYR	0.202227	YES	YES	-2.464	-2.464	-2.464	-2.464
ENSG00000077514	POLD3	0.00639228	NO	NO
ENSG00000077522	ACTN2	0.130284	YES	NO
ENSG00000077549	CAPZB	0.0236615	NO	NO
ENSG00000077585	GPR137B	0.0826759	NO	NO
ENSG00000077684	JADE1	0.00843382	NO	NO
ENSG00000077782	FGFR1	0.086943	NO	NO
ENSG00000077800		0.0295985	NO	NO
ENSG00000077809		0.00864278	NO	NO
ENSG00000077935	SMC1B	0.0725211	NO	NO
ENSG00000077942	FBLN1	0.0704292	NO	NO
ENSG00000077943	ITGA8	0.161675	YES	NO
ENSG00000077984	CST7	0.170013	YES	YES	-3.529	-3.529	-3.529	-3.529
ENSG00000078018		0.0282093	NO	NO
ENSG00000078043	PIAS2	0.0750701	NO	NO
ENSG00000078053	AMPH	0.13753	YES	NO
ENSG00000078070	MCCC1	0.149347	YES	NO
ENSG00000078081	LAMP3	0.0578829	NO	NO
ENSG00000078098	FAP	0.151439	YES	YES	2.73	2.73	2.73	2.73
ENSG00000078114	NEBL	0.0511125	NO	NO
ENSG00000078124	ACER3	0.0402232	NO	NO
ENSG00000078140	UBE2K	0.0074191	NO	NO
ENSG00000078142	PIK3C3	0.0114359	NO	NO
ENSG00000078177	N4BP2	0.00990435	NO	NO
ENSG00000078237		0.0085724	NO	NO
ENSG00000078246	TULP3	0.0210064	NO	NO
ENSG00000078269	SYNJ2	0.0288925	NO	NO
ENSG00000078295	ADCY2	0.0987365	NO	NO
ENSG00000078304	PPP2R5C	0.011814	NO	NO
ENSG00000078328	RBFOX1	0.121422	YES	NO
ENSG00000078369	GNB1	0.015481	NO	NO
ENSG00000078399	HOXA9	0.155098	YES	YES	-2.803	-2.803	-2.803	-2.803
ENSG00000078401	EDN1	0.0095815	NO	NO
ENSG00000078403	MLLT10	0.0175986	NO	NO
ENSG00000078487	ZCWPW1	0.00938676	NO	NO
ENSG00000078549	ADCYAP1R1	0.0976584	NO	NO
ENSG00000078579	FGF20	0.11216	YES	NO
ENSG00000078618	NRD1	0.0114486	NO	NO
ENSG00000078668		0.0246603	NO	NO
ENSG00000078674		0.00943011	NO	NO
ENSG00000078687	TNRC6C	0.0750283	NO	NO
ENSG00000078699	CBFA2T2	0.00728568	NO	NO
ENSG00000078725	BRINP1	0.127632	YES	NO
ENSG00000078747	ITCH	0.0362318	NO	NO
ENSG00000078804	TP53INP2	0.0291401	NO	NO
ENSG00000078808	SDF4	0.0472925	NO	NO
ENSG00000078814	MYH7B	0.0677825	NO	NO
ENSG00000078898	BPIFB2	0.131637	YES	NO
ENSG00000078900	TP73	0.0866952	NO	NO
ENSG00000078902	TOLLIP	0.0444909	NO	NO
ENSG00000078967	UBE2D4	0.00780132	NO	NO
ENSG00000079101	CLUL1	0.0260508	NO	NO
ENSG00000079102	RUNX1T1	0.0824715	NO	NO
ENSG00000079112	CDH17	0.11101	YES	NO
ENSG00000079150	FKBP7	0.0241513	NO	NO
ENSG00000079156	OSBPL6	0.0438769	NO	NO
ENSG00000079215	SLC1A3	0.109373	YES	YES	-3.228	-3.228	-3.228	-3.228
ENSG00000079257	LXN	0.156326	YES	NO
ENSG00000079277	MKNK1	0.0180692	NO	NO
ENSG00000079308	TNS1	0.104716	YES	NO
ENSG00000079313	REXO1	0.00826335	NO	NO
ENSG00000079332	SAR1A	0.0285749	NO	NO
ENSG00000079387	SENP1	0.006487	NO	NO
ENSG00000079393	DUSP13	0.0636398	NO	NO
ENSG00000079432	CIC	0.0131272	NO	NO
ENSG00000079435	LIPE	0.0465966	NO	NO
ENSG00000079459	FDFT1	0.0386068	NO	NO
ENSG00000079462	PAFAH1B3	0.132869	YES	NO
ENSG00000079557	AFM	0.0299387	NO	NO
ENSG00000079616	KIF22	0.0167015	NO	NO
ENSG00000079689	SCGN	0.118434	YES	NO
ENSG00000079691	LRRC16A	0.00773088	NO	NO
ENSG00000079739	PGM1	0.0319222	NO	NO
ENSG00000079785	DDX1	0.0398649	NO	NO
ENSG00000079805	DNM2	0.00671713	NO	NO
ENSG00000079819	EPB41L2	0.0420284	NO	NO
ENSG00000079841	RIMS1	0.0652688	NO	NO
ENSG00000079931	MOXD1	0.102766	NO	NO
ENSG00000079950	STX7	0.0146609	NO	NO
ENSG00000079974	RABL2B	0.0103473	NO	NO
ENSG00000079999	KEAP1	0.0380737	NO	NO
ENSG00000080007	DDX43	0.102735	NO	NO
ENSG00000080031	PTPRH	0.101705	NO	NO
ENSG00000080166	DCT	0.113646	YES	NO
ENSG00000080189	SLC35C2	0.0579511	NO	NO
ENSG00000080200	CRYBG3	0.0386944	NO	NO
ENSG00000080224	EPHA6	0.111202	YES	NO
ENSG00000080293	SCTR	0.100574	NO	NO
ENSG00000080345		0.0135916	NO	NO
ENSG00000080371	RAB21	0.0180564	NO	NO
ENSG00000080493	SLC4A4	0.0172517	NO	NO
ENSG00000080503	SMARCA2	0.031794	NO	NO
ENSG00000080511	RDH8	0.0965169	NO	NO
ENSG00000080546	SESN1	0.0103347	NO	NO
ENSG00000080573	COL5A3	0.0633691	NO	NO
ENSG00000080603	SRCAP	0.0142968	NO	NO
ENSG00000080608		0.0151811	NO	NO
ENSG00000080618	CPB2	0.120818	YES	NO
ENSG00000080644	CHRNA3	0.0834592	NO	NO
ENSG00000080709	KCNN2	0.111662	YES	YES	-1.968	-1.968	-1.968	-1.968
ENSG00000080802	CNOT4	0.00986885	NO	NO
ENSG00000080815	PSEN1	0.0460631	NO	NO
ENSG00000080819	CPOX	0.031659	NO	NO
ENSG00000080822	CLDND1	0.00864922	NO	NO
ENSG00000080823	MOK	0.0173248	NO	NO
ENSG00000080824	HSP90AA1	0.00684637	NO	NO
ENSG00000080839	RBL1	0.0156068	NO	NO
ENSG00000080845	DLGAP4	0.109935	YES	NO
ENSG00000080854	IGSF9B	0.0939848	NO	NO
ENSG00000080910	CFHR2	0.140613	YES	NO
ENSG00000080947		0.0141522	NO	NO
ENSG00000080986	NDC80	0.00901682	NO	NO
ENSG00000081014	AP4E1	0.0168479	NO	NO
ENSG00000081019	RSBN1	0.0266052	NO	NO
ENSG00000081026	MAGI3	0.0110073	NO	NO
ENSG00000081041	CXCL2	0.0354606	NO	NO
ENSG00000081051	AFP	0.111929	YES	NO
ENSG00000081052	COL4A4	0.0283082	NO	NO
ENSG00000081059	TCF7	0.0472772	NO	NO
ENSG00000081087	OSTM1	0.148389	YES	NO
ENSG00000081138		0.127253	YES	NO
ENSG00000081148	IMPG2	0.0708486	NO	NO
ENSG00000081154	PCNP	0.00642438	NO	NO
ENSG00000081177	EXD2	0.0052334	NO	NO
ENSG00000081181	ARG2	0.0102092	NO	NO
ENSG00000081237	PTPRC	0.139581	YES	NO
ENSG00000081248	CACNA1S	0.0659865	NO	NO
ENSG00000081277	PKP1	0.11439	YES	NO
ENSG00000081307	UBA5	0.030661	NO	NO
ENSG00000081377	CDC14B	0.0392728	NO	NO
ENSG00000081386	ZNF510	0.017771	NO	NO
ENSG00000081479	LRP2	0.0729808	NO	NO
ENSG00000081665	ZNF506	0.0973351	NO	NO
ENSG00000081692	JMJD4	0.0392719	NO	NO
ENSG00000081721	DUSP12	0.0151266	NO	NO
ENSG00000081760	AACS	0.0082628	NO	NO
ENSG00000081791	KIAA0141	0.0287187	NO	NO
ENSG00000081800	SLC13A1	0.091081	NO	NO
ENSG00000081803	CADPS2	0.0220791	NO	NO
ENSG00000081818		0.131761	YES	NO
ENSG00000081842		0.0997447	NO	NO
ENSG00000081853		0.125786	YES	NO
ENSG00000081870	HSPB11	0.00892356	NO	NO
ENSG00000081913	PHLPP1	0.0104235	NO	NO
ENSG00000081923	ATP8B1	0.0346882	NO	NO
ENSG00000081985	IL12RB2	0.163308	YES	YES	-1.878	-1.878	-1.878	-1.878
ENSG00000082014	SMARCD3	0.0169677	NO	NO
ENSG00000082068	WDR70	0.0128972	NO	NO
ENSG00000082126		0.0733575	NO	NO
ENSG00000082153	BZW1	0.0793394	NO	NO
ENSG00000082175	PGR	0.122561	YES	NO
ENSG00000082212		0.0156416	NO	NO
ENSG00000082213	C5ORF22	0.00897546	NO	NO
ENSG00000082258	CCNT2	0.0121793	NO	NO
ENSG00000082269	FAM135A	0.0364718	NO	NO
ENSG00000082293	COL19A1	0.121	YES	NO
ENSG00000082397	EPB41L3	0.111897	YES	NO
ENSG00000082438	COBLL1	0.0250947	NO	NO
ENSG00000082482	KCNK2	0.146072	YES	NO
ENSG00000082497	SERTAD4	0.0487481	NO	NO
ENSG00000082512	TRAF5	0.0473207	NO	NO
ENSG00000082515	MRPL22	0.0135587	NO	NO
ENSG00000082516	GEMIN5	0.0251046	NO	NO
ENSG00000082556	OPRK1	0.122714	YES	NO
ENSG00000082641	NFE2L1	0.0462336	NO	NO
ENSG00000082684	SEMA5B	0.0558892	NO	NO
ENSG00000082701	GSK3B	0.00646318	NO	NO
ENSG00000082781	ITGB5	0.0110449	NO	NO
ENSG00000082805	ERC1	0.0375774	NO	NO
ENSG00000082898	XPO1	0.0102317	NO	NO
ENSG00000082929		0.112407	YES	NO
ENSG00000082996	RNF13	0.0385153	NO	NO
ENSG00000083067	TRPM3	0.157082	YES	NO
ENSG00000083097	DOPEY1	0.0191361	NO	NO
ENSG00000083099	LYRM2	0.0118863	NO	NO
ENSG00000083123	BCKDHB	0.00695205	NO	NO
ENSG00000083168	KAT6A	0.0257171	NO	NO
ENSG00000083223	ZCCHC6	0.0101929	NO	NO
ENSG00000083290	ULK2	0.0602411	NO	NO
ENSG00000083307	GRHL2	0.0459337	NO	NO
ENSG00000083312	TNPO1	0.0144559	NO	NO
ENSG00000083444	PLOD1	0.0299877	NO	NO
ENSG00000083454	P2RX5	0.0656188	NO	NO
ENSG00000083457	ITGAE	0.0706704	NO	NO
ENSG00000083520	DIS3	0.00967113	NO	NO
ENSG00000083535	PIBF1	0.00929183	NO	NO
ENSG00000083544	TDRD3	0.00733652	NO	NO
ENSG00000083635	NUFIP1	0.0152552	NO	NO
ENSG00000083642	PDS5B	0.0122994	NO	NO
ENSG00000083720	OXCT1	0.055677	NO	NO
ENSG00000083799	CYLD	0.0138551	NO	NO
ENSG00000083807	SLC27A5	0.0810236	NO	NO
ENSG00000083812	ZNF324	0.0165717	NO	NO
ENSG00000083814	ZNF671	0.162223	YES	YES	3.249	3.249	3.249	3.249
ENSG00000083817	ZNF416	0.0442723	NO	NO
ENSG00000083828	ZNF586	0.0883764	NO	NO
ENSG00000083838	ZNF446	0.0438111	NO	NO
ENSG00000083844	ZNF264	0.0373296	NO	NO
ENSG00000083845	RPS5	0.0335732	NO	NO
ENSG00000083857	FAT1	0.0621701	NO	NO
ENSG00000083896	YTHDC1	0.032486	NO	NO
ENSG00000083937	CHMP2B	0.00983953	NO	NO
ENSG00000084072	PPIE	0.0437164	NO	NO
ENSG00000084073	ZMPSTE24	0.00818743	NO	NO
ENSG00000084090	STARD7	0.0185142	NO	NO
ENSG00000084092	NOA1	0.0101681	NO	NO
ENSG00000084093	REST	0.0325504	NO	NO
ENSG00000084110	HAL	0.0761432	NO	NO
ENSG00000084112	SSH1	0.0237309	NO	NO
ENSG00000084207	GSTP1	0.075175	NO	NO
ENSG00000084234	APLP2	0.0128007	NO	NO
ENSG00000084444		0.0445254	NO	NO
ENSG00000084453	SLCO1A2	0.108858	YES	NO
ENSG00000084463	WBP11	0.011309	NO	NO
ENSG00000084623		0.0247254	NO	NO
ENSG00000084628	NKAIN1	0.0677562	NO	NO
ENSG00000084636	COL16A1	0.101003	NO	NO
ENSG00000084652	TXLNA	0.0322763	NO	NO
ENSG00000084674	APOB	0.0848499	NO	NO
ENSG00000084676	NCOA1	0.0426851	NO	NO
ENSG00000084693	AGBL5	0.0415985	NO	NO
ENSG00000084710	EFR3B	0.0140151	NO	NO
ENSG00000084731	KIF3C	0.0444072	NO	NO
ENSG00000084733	RAB10	0.00542183	NO	NO
ENSG00000084734		0.0887134	NO	NO
ENSG00000084754	HADHA	0.00826688	NO	NO
ENSG00000084764	MAPRE3	0.00765228	NO	NO
ENSG00000084774		0.0307853	NO	NO
ENSG00000085063	CD59	0.0340061	NO	NO
ENSG00000085117	CD82	0.152062	YES	NO
ENSG00000085231	TAF9	0.00777668	NO	NO
ENSG00000085265	FCN1	0.151906	YES	NO
ENSG00000085274	MYNN	0.0117312	NO	NO
ENSG00000085276	MECOM	0.101982	NO	NO
ENSG00000085365	SCAMP1	0.00583397	NO	NO
ENSG00000085377		0.0169783	NO	NO
ENSG00000085382	HACE1	0.0232522	NO	NO
ENSG00000085415	SEH1L	0.0106852	NO	NO
ENSG00000085433	WDR47	0.0128697	NO	NO
ENSG00000085449	WDFY1	0.0456455	NO	NO
ENSG00000085465	OVGP1	0.0921915	NO	NO
ENSG00000085491	SLC25A24	0.012428	NO	NO
ENSG00000085511	MAP3K4	0.0105464	NO	NO
ENSG00000085514	PILRA	0.110253	YES	NO
ENSG00000085552	IGSF9	0.040284	NO	NO
ENSG00000085563	ABCB1	0.152104	YES	NO
ENSG00000085644	ZNF213	0.0259095	NO	NO
ENSG00000085662	AKR1B1	0.152213	YES	NO
ENSG00000085721	RRN3	0.0259436	NO	NO
ENSG00000085733	CTTN	0.0129412	NO	NO
ENSG00000085741	WNT11	0.0884501	NO	NO
ENSG00000085760	MTIF2	0.0139744	NO	NO
ENSG00000085831	TTC39A	0.0357149	NO	NO
ENSG00000085832	EPS15	0.0289432	NO	NO
ENSG00000085840		0.00909095	NO	NO
ENSG00000085871	MGST2	0.0293008	NO	NO
ENSG00000085872	CHERP	0.00685992	NO	NO
ENSG00000085978	ATG16L1	0.113194	YES	YES	-3.003	-3.003	-3.003	-3.003
ENSG00000085998	POMGNT1	0.0264675	NO	NO
ENSG00000085999	RAD54L	0.0099205	NO	NO
ENSG00000086061	DNAJA1	0.0101602	NO	NO
ENSG00000086062	B4GALT1	0.0307467	NO	NO
ENSG00000086065	CHMP5	0.011832	NO	NO
ENSG00000086102	NFX1	0.0084933	NO	NO
ENSG00000086159	AQP6	0.0120016	NO	NO
ENSG00000086200	IPO11	0.00991266	NO	NO
ENSG00000086205	FOLH1	0.10675	YES	NO
ENSG00000086232		0.0215762	NO	NO
ENSG00000086288	NME8	0.117196	YES	NO
ENSG00000086300	SNX10	0.0643944	NO	NO
ENSG00000086475	SEPHS1	0.00987611	NO	NO
ENSG00000086504	MRPL28	0.0743683	NO	NO
ENSG00000086506	HBQ1	0.0996738	NO	NO
ENSG00000086544	ITPKC	0.0176243	NO	NO
ENSG00000086570	FAT2	0.074501	NO	NO
ENSG00000086589	RBM22	0.0158038	NO	NO
ENSG00000086598	TMED2	0.00899246	NO	NO
ENSG00000086619		0.0417174	NO	NO
ENSG00000086666	ZFAND6	0.00873178	NO	NO
ENSG00000086696	HSD17B2	0.110739	YES	NO
ENSG00000086827	ZW10	0.00673721	NO	NO
ENSG00000086848	ALG9	0.0224404	NO	NO
ENSG00000086967	MYBPC2	0.0359659	NO	NO
ENSG00000087008	ACOX3	0.0196716	NO	NO
ENSG00000087053	MTMR2	0.102712	NO	NO
ENSG00000087074	PPP1R15A	0.0154269	NO	NO
ENSG00000087076	HSD17B14	0.171865	YES	NO
ENSG00000087077	TRIP6	0.0887662	NO	NO
ENSG00000087085	ACHE	0.0760241	NO	NO
ENSG00000087086	FTL	0.0186016	NO	NO
ENSG00000087087	SRRT	0.0377555	NO	NO
ENSG00000087088	BAX	0.0285336	NO	NO
ENSG00000087095		0.0092076	NO	NO
ENSG00000087111	PIGS	0.040536	NO	NO
ENSG00000087116	ADAMTS2	0.134353	YES	NO
ENSG00000087128	TMPRSS11E	0.078857	NO	NO
ENSG00000087152	ATXN7L3	0.015651	NO	NO
ENSG00000087157		0.0101587	NO	NO
ENSG00000087191	PSMC5	0.014694	NO	NO
ENSG00000087237	CETP	0.0616172	NO	NO
ENSG00000087250	MT3	0.130466	YES	NO
ENSG00000087253	LPCAT2	0.0683186	NO	NO
ENSG00000087258	GNAO1	0.102561	NO	NO
ENSG00000087263	OGFOD1	0.0120962	NO	NO
ENSG00000087266	SH3BP2	0.0302353	NO	NO
ENSG00000087269	NOP14	0.0126609	NO	NO
ENSG00000087274	ADD1	0.0116565	NO	NO
ENSG00000087299	L2HGDH	0.0322033	NO	NO
ENSG00000087302	C14ORF166	0.0215139	NO	NO
ENSG00000087303	NID2	0.156383	YES	NO
ENSG00000087338	GMCL1	0.0122408	NO	NO
ENSG00000087365	SF3B2	0.0814077	NO	NO
ENSG00000087448	KLHL42	0.0869701	NO	NO
ENSG00000087460	GNAS	0.0825122	NO	NO
ENSG00000087470	DNM1L	0.0357687	NO	NO
ENSG00000087494	PTHLH	0.148797	YES	YES	3.299	3.299	3.299	3.299
ENSG00000087495	PHACTR3	0.12173	YES	NO
ENSG00000087502	ERGIC2	0.0227841	NO	NO
ENSG00000087510	TFAP2C	0.0298061	NO	NO
ENSG00000087586	AURKA	0.02168	NO	NO
ENSG00000087589	CASS4	0.126814	YES	NO
ENSG00000087884	AAMDC	0.00613702	NO	NO
ENSG00000087903	RFX2	0.0220768	NO	NO
ENSG00000087995	METTL2A	0.0117737	NO	NO
ENSG00000088002	SULT2B1	0.0818092	NO	NO
ENSG00000088035	ALG6	0.0173041	NO	NO
ENSG00000088038	CNOT3	0.00652112	NO	NO
ENSG00000088053	GP6	0.0904474	NO	NO
ENSG00000088179	PTPN4	0.017493	NO	NO
ENSG00000088205	DDX18	0.00724313	NO	NO
ENSG00000088247	KHSRP	0.0549085	NO	NO
ENSG00000088256	GNA11	0.0231365	NO	NO
ENSG00000088280	ASAP3	0.0205677	NO	NO
ENSG00000088305	DNMT3B	0.0351648	NO	NO
ENSG00000088320	REM1	0.125697	YES	NO
ENSG00000088325	TPX2	0.00591166	NO	NO
ENSG00000088340		0.0842063	NO	NO
ENSG00000088356	PDRG1	0.0264283	NO	NO
ENSG00000088367	EPB41L1	0.133889	YES	NO
ENSG00000088386	SLC15A1	0.100171	NO	NO
ENSG00000088387	DOCK9	0.0093581	NO	NO
ENSG00000088448	ANKRD10	0.00841252	NO	NO
ENSG00000088451	TGDS	0.013698	NO	NO
ENSG00000088538	DOCK3	0.0549011	NO	NO
ENSG00000088543	C3ORF18	0.0468446	NO	NO
ENSG00000088682	COQ9	0.0157031	NO	NO
ENSG00000088726	TMEM40	0.117026	YES	NO
ENSG00000088727	KIF9	0.0100182	NO	NO
ENSG00000088756	ARHGAP28	0.0854279	NO	NO
ENSG00000088766	CRLS1	0.00574422	NO	NO
ENSG00000088782	DEFB127	0.0905182	NO	NO
ENSG00000088808	PPP1R13B	0.0430111	NO	NO
ENSG00000088812	ATRN	0.0131284	NO	NO
ENSG00000088827	SIGLEC1	0.0827069	NO	NO
ENSG00000088832	FKBP1A	0.0276339	NO	NO
ENSG00000088833	NSFL1C	0.0909173	NO	NO
ENSG00000088836	SLC4A11	0.0880798	NO	NO
ENSG00000088854	C20ORF194	0.0392731	NO	NO
ENSG00000088876	ZNF343	0.0245577	NO	NO
ENSG00000088881	EBF4	0.074996	NO	NO
ENSG00000088882	CPXM1	0.150251	YES	YES	-2.011	-2.011	-2.011	-2.011
ENSG00000088888	MAVS	0.00661927	NO	NO
ENSG00000088899		0.0210787	NO	NO
ENSG00000088926		0.0745198	NO	NO
ENSG00000088930	XRN2	0.01513	NO	NO
ENSG00000088970	KIZ	0.0168997	NO	NO
ENSG00000088986	DYNLL1	0.0182385	NO	NO
ENSG00000088992	TESC	0.0589867	NO	NO
ENSG00000089006	SNX5	0.00572898	NO	NO
ENSG00000089009	RPL6	0.0100849	NO	NO
ENSG00000089012	SIRPG	0.151682	YES	NO
ENSG00000089022	MAPKAPK5	0.00835321	NO	NO
ENSG00000089041	P2RX7	0.0880844	NO	NO
ENSG00000089048	ESF1	0.008868	NO	NO
ENSG00000089050	RBBP9	0.0126624	NO	NO
ENSG00000089053	ANAPC5	0.00594822	NO	NO
ENSG00000089057		0.0585267	NO	NO
ENSG00000089060	SLC8B1	0.0318946	NO	NO
ENSG00000089063	TMEM230	0.0156592	NO	NO
ENSG00000089091	DZANK1	0.00994641	NO	NO
ENSG00000089094	KDM2B	0.108259	YES	YES	-1.965	-1.965	-1.965	-1.965
ENSG00000089101	CFAP61	0.00561057	NO	NO
ENSG00000089116	LHX5	0.102916	NO	NO
ENSG00000089123	TASP1	0.0151477	NO	NO
ENSG00000089127	OAS1	0.073991	NO	NO
ENSG00000089154		0.00684337	NO	NO
ENSG00000089157	RPLP0	0.00636117	NO	NO
ENSG00000089159		0.0312668	NO	NO
ENSG00000089163	SIRT4	0.018523	NO	NO
ENSG00000089177	KIF16B	0.0285047	NO	NO
ENSG00000089195	TRMT6	0.00768407	NO	NO
ENSG00000089199	CHGB	0.105108	YES	YES	-2.569	-2.569	-2.569	-2.569
ENSG00000089220	PEBP1	0.0380867	NO	NO
ENSG00000089225	TBX5	0.131768	YES	NO
ENSG00000089234		0.00876438	NO	NO
ENSG00000089248		0.0058497	NO	NO
ENSG00000089280	FUS	0.0122001	NO	NO
ENSG00000089327	FXYD5	0.0235408	NO	NO
ENSG00000089335	ZNF302	0.00868998	NO	NO
ENSG00000089356	FXYD3	0.0779758	NO	NO
ENSG00000089486	CDIP1	0.0167825	NO	NO
ENSG00000089505	CMTM1	0.0216712	NO	NO
ENSG00000089558	KCNH4	0.101248	NO	NO
ENSG00000089597	GANAB	0.0363607	NO	NO
ENSG00000089639	GMIP	0.0125287	NO	NO
ENSG00000089685	BIRC5	0.0215917	NO	NO
ENSG00000089692	LAG3	0.109435	YES	NO
ENSG00000089693	MLF2	0.0626979	NO	NO
ENSG00000089723	OTUB2	0.0332018	NO	NO
ENSG00000089737	DDX24	0.0099455	NO	NO
ENSG00000089775	ZBTB25	0.028213	NO	NO
ENSG00000089818	NECAP1	0.0122493	NO	NO
ENSG00000089847	ANKRD24	0.0279676	NO	NO
ENSG00000089876	DHX32	0.0349347	NO	NO
ENSG00000089902	RCOR1	0.0168312	NO	NO
ENSG00000089916	GPATCH2L	0.0260214	NO	NO
ENSG00000090006	LTBP4	0.051036	NO	NO
ENSG00000090013	BLVRB	0.0085351	NO	NO
ENSG00000090054	SPTLC1	0.0143333	NO	NO
ENSG00000090060	PAPOLA	0.0580238	NO	NO
ENSG00000090061	CCNK	0.00598992	NO	NO
ENSG00000090104	RGS1	0.152825	YES	NO
ENSG00000090238	YPEL3	0.0454447	NO	NO
ENSG00000090263	MRPS33	0.0383423	NO	NO
ENSG00000090273		0.0137569	NO	NO
ENSG00000090316	MAEA	0.00821939	NO	NO
ENSG00000090339	ICAM1	0.0242541	NO	NO
ENSG00000090372	STRN4	0.0806018	NO	NO
ENSG00000090376	IRAK3	0.128614	YES	YES	-2.65	-2.65	-2.65	-2.65
ENSG00000090382	LYZ	0.11748	YES	YES	-3.54	-3.54	-3.54	-3.54
ENSG00000090432	MUL1	0.0359703	NO	NO
ENSG00000090447	TFAP4	0.010266	NO	NO
ENSG00000090470	PDCD7	0.0169903	NO	NO
ENSG00000090487	SPG21	0.0199302	NO	NO
ENSG00000090512	FETUB	0.0891317	NO	NO
ENSG00000090520	DNAJB11	0.00642237	NO	NO
ENSG00000090530	P3H2	0.0655487	NO	NO
ENSG00000090534	THPO	0.102621	NO	NO
ENSG00000090539	CHRD	0.064741	NO	NO
ENSG00000090554	FLT3LG	0.0145542	NO	NO
ENSG00000090565	RAB11FIP3	0.0580024	NO	NO
ENSG00000090581	GNPTG	0.0213559	NO	NO
ENSG00000090612	ZNF268	0.0132435	NO	NO
ENSG00000090615	GOLGA3	0.0288388	NO	NO
ENSG00000090621	PABPC4	0.0122392	NO	NO
ENSG00000090659	CD209	0.0773801	NO	NO
ENSG00000090661	CERS4	0.126261	YES	NO
ENSG00000090674	MCOLN1	0.0113676	NO	NO
ENSG00000090686	USP48	0.0064387	NO	NO
ENSG00000090857	PDPR	0.0249595	NO	NO
ENSG00000090861	AARS	0.0158043	NO	NO
ENSG00000090863	GLG1	0.00888142	NO	NO
ENSG00000090905	TNRC6A	0.00607603	NO	NO
ENSG00000090920		0.0673827	NO	NO
ENSG00000090924	PLEKHG2	0.013123	NO	NO
ENSG00000090932	DLL3	0.0709789	NO	NO
ENSG00000090971	NAT14	0.0388168	NO	NO
ENSG00000090975	PITPNM2	0.0545458	NO	NO
ENSG00000090989	EXOC1	0.0359686	NO	NO
ENSG00000091009	RBM27	0.00714354	NO	NO
ENSG00000091010	POU4F3	0.115414	YES	NO
ENSG00000091039	OSBPL8	0.00698396	NO	NO
ENSG00000091106	NLRC4	0.0821352	NO	NO
ENSG00000091127	PUS7	0.0196973	NO	NO
ENSG00000091128	LAMB4	0.106455	YES	NO
ENSG00000091129	NRCAM	0.11691	YES	NO
ENSG00000091136	LAMB1	0.106514	YES	YES	-2.046	-2.046	-2.046	-2.046
ENSG00000091137	SLC26A4	0.102815	NO	NO
ENSG00000091138	SLC26A3	0.13019	YES	NO
ENSG00000091140	DLD	0.022452	NO	NO
ENSG00000091157	WDR7	0.00798109	NO	NO
ENSG00000091164	TXNL1	0.00894067	NO	NO
ENSG00000091181	IL5RA	0.0212361	NO	NO
ENSG00000091317	CMTM6	0.0179697	NO	NO
ENSG00000091409	ITGA6	0.038856	NO	NO
ENSG00000091428	RAPGEF4	0.0824273	NO	NO
ENSG00000091436		0.0368623	NO	NO
ENSG00000091483	FH	0.0070506	NO	NO
ENSG00000091490	SEL1L3	0.100783	NO	NO
ENSG00000091513	TF	0.094527	NO	NO
ENSG00000091527	CDV3	0.00858484	NO	NO
ENSG00000091536	MYO15A	0.065378	NO	NO
ENSG00000091542	ALKBH5	0.015059	NO	NO
ENSG00000091622	PITPNM3	0.0261101	NO	NO
ENSG00000091640	SPAG7	0.0463428	NO	NO
ENSG00000091651	ORC6	0.0107708	NO	NO
ENSG00000091656	ZFHX4	0.155017	YES	NO
ENSG00000091664	SLC17A6	0.128154	YES	NO
ENSG00000091704	CPA1	0.0951086	NO	NO
ENSG00000091732	ZC3HC1	0.0349696	NO	NO
ENSG00000091844	RGS17	0.0906043	NO	NO
ENSG00000091879	ANGPT2	0.108787	YES	YES	-2.494	-2.494	-2.494	-2.494
ENSG00000092009	CMA1	0.178707	YES	NO
ENSG00000092010	PSME1	0.0132481	NO	NO
ENSG00000092036	HAUS4	0.0119169	NO	NO
ENSG00000092051	JPH4	0.0936816	NO	NO
ENSG00000092054	MYH7	0.104771	YES	NO
ENSG00000092067	CEBPE	0.0725706	NO	NO
ENSG00000092068	SLC7A8	0.0932161	NO	NO
ENSG00000092094	OSGEP	0.0130051	NO	NO
ENSG00000092096	SLC22A17	0.0756392	NO	NO
ENSG00000092098	RNF31	0.0155728	NO	NO
ENSG00000092108	SCFD1	0.0301395	NO	NO
ENSG00000092140	G2E3	0.0195858	NO	NO
ENSG00000092148	HECTD1	0.00761051	NO	NO
ENSG00000092199		0.0130458	NO	NO
ENSG00000092200	RPGRIP1	0.0353304	NO	NO
ENSG00000092201	SUPT16H	0.0252049	NO	NO
ENSG00000092203	TOX4	0.00955484	NO	NO
ENSG00000092208	GEMIN2	0.0154311	NO	NO
ENSG00000092295	TGM1	0.0668183	NO	NO
ENSG00000092330	TINF2	0.00697906	NO	NO
ENSG00000092345	DAZL	0.0643928	NO	NO
ENSG00000092421	SEMA6A	0.0905916	NO	NO
ENSG00000092439	TRPM7	0.00786019	NO	NO
ENSG00000092445	TYRO3	0.0227895	NO	NO
ENSG00000092470	WDR76	0.010278	NO	NO
ENSG00000092529	CAPN3	0.025533	NO	NO
ENSG00000092531	SNAP23	0.0196312	NO	NO
ENSG00000092607	TBX15	0.124932	YES	NO
ENSG00000092758	COL9A3	0.0954838	NO	NO
ENSG00000092820	EZR	0.0244327	NO	NO
ENSG00000092841	MYL6	0.00949603	NO	NO
ENSG00000092847	AGO1	0.123861	YES	NO
ENSG00000092850	TEKT2	0.0759438	NO	NO
ENSG00000092853	CLSPN	0.00621166	NO	NO
ENSG00000092871	RFFL	0.0900377	NO	NO
ENSG00000092929	UNC13D	0.0595624	NO	NO
ENSG00000092931	MFSD11	0.0510024	NO	NO
ENSG00000092964	DPYSL2	0.0533429	NO	NO
ENSG00000092969	TGFB2	0.040298	NO	NO
ENSG00000092978	GPATCH2	0.0229683	NO	NO
ENSG00000093000	NUP50	0.0230148	NO	NO
ENSG00000093009	CDC45	0.0107619	NO	NO
ENSG00000093010	COMT	0.0264579	NO	NO
ENSG00000093134	VNN3	0.0735637	NO	NO
ENSG00000093144	ECHDC1	0.0316009	NO	NO
ENSG00000093167	LRRFIP2	0.172253	YES	NO
ENSG00000093183	SEC22C	0.00780377	NO	NO
ENSG00000093217	XYLB	0.012555	NO	NO
ENSG00000094661	OR1I1	0.0818669	NO	NO
ENSG00000094796	KRT31	0.0869831	NO	NO
ENSG00000094804	CDC6	0.0113354	NO	NO
ENSG00000094880	CDC23	0.0134197	NO	NO
ENSG00000094914	AAAS	0.0964113	NO	NO
ENSG00000094916	CBX5	0.00803164	NO	NO
ENSG00000094963		0.12565	YES	NO
ENSG00000094975	SUCO	0.0166318	NO	NO
ENSG00000095002	MSH2	0.00760622	NO	NO
ENSG00000095015	MAP3K1	0.0100645	NO	NO
ENSG00000095059	DHPS	0.0127509	NO	NO
ENSG00000095110	NXPE1	0.109079	YES	NO
ENSG00000095139	ARCN1	0.0109753	NO	NO
ENSG00000095203	EPB41L4B	0.0296203	NO	NO
ENSG00000095209	TMEM38B	0.00993024	NO	NO
ENSG00000095261	PSMD5	0.062911	NO	NO
ENSG00000095303	PTGS1	0.0562063	NO	NO
ENSG00000095319	NUP188	0.011236	NO	NO
ENSG00000095321	CRAT	0.00775529	NO	NO
ENSG00000095370	SH2D3C	0.101911	NO	NO
ENSG00000095380	NANS	0.00804045	NO	NO
ENSG00000095383	TBC1D2	0.0143239	NO	NO
ENSG00000095397	DFNB31	0.0495675	NO	NO
ENSG00000095464	PDE6C	0.101904	NO	NO
ENSG00000095485	CWF19L1	0.0150097	NO	NO
ENSG00000095539	SEMA4G	0.0235637	NO	NO
ENSG00000095564	BTAF1	0.0157519	NO	NO
ENSG00000095574	IKZF5	0.0139174	NO	NO
ENSG00000095585	BLNK	0.106854	YES	YES	3.311	3.311	3.311	3.311
ENSG00000095587	TLL2	0.116008	YES	YES	-3.015	-3.015	-3.015	-3.015
ENSG00000095596	CYP26A1	0.0903057	NO	NO
ENSG00000095627	TDRD1	0.0812642	NO	NO
ENSG00000095637	SORBS1	0.00760772	NO	NO
ENSG00000095713	CRTAC1	0.114797	YES	NO
ENSG00000095739	BAMBI	0.0587202	NO	NO
ENSG00000095752	IL11	0.0862066	NO	NO
ENSG00000095777	MYO3A	0.131484	YES	NO
ENSG00000095787	WAC	0.0073248	NO	NO
ENSG00000095794	CREM	0.00711033	NO	NO
ENSG00000095906	NUBP2	0.0120521	NO	NO
ENSG00000095917	TPSD1	0.127268	YES	NO
ENSG00000095932	SMIM24	0.0892278	NO	NO
ENSG00000095951	HIVEP1	0.0155475	NO	NO
ENSG00000095970	TREM2	0.120896	YES	NO
ENSG00000095981	KCNK16	0.120791	YES	NO
ENSG00000096060	FKBP5	0.0573031	NO	NO
ENSG00000096063	SRPK1	0.0315242	NO	NO
ENSG00000096070	BRPF3	0.00920664	NO	NO
ENSG00000096080	MRPS18A	0.0177282	NO	NO
ENSG00000096092	TMEM14A	0.0123988	NO	NO
ENSG00000096093	EFHC1	0.0196886	NO	NO
ENSG00000096264	NCR2	0.0716694	NO	NO
ENSG00000096384	HSP90AB1	0.0122162	NO	NO
ENSG00000096395		0.125435	YES	NO
ENSG00000096401	CDC5L	0.026476	NO	NO
ENSG00000096433	ITPR3	0.0352649	NO	NO
ENSG00000096654	ZNF184	0.020408	NO	NO
ENSG00000096696	DSP	0.0550488	NO	NO
ENSG00000096717	SIRT1	0.0123681	NO	NO
ENSG00000096746	HNRNPH3	0.0233608	NO	NO
ENSG00000096872	IFT74	0.0115173	NO	NO
ENSG00000096968	JAK2	0.0402256	NO	NO
ENSG00000096996	IL12RB1	0.100218	NO	NO
ENSG00000097007	ABL1	0.0352883	NO	NO
ENSG00000097021	ACOT7	0.0174633	NO	NO
ENSG00000097033	SH3GLB1	0.0142218	NO	NO
ENSG00000097046	CDC7	0.00897085	NO	NO
ENSG00000097096	SYDE2	0.00961824	NO	NO
ENSG00000099139	PCSK5	0.0132131	NO	NO
ENSG00000099194		0.0244245	NO	NO
ENSG00000099203	TMED1	0.0164148	NO	NO
ENSG00000099204	ABLIM1	0.0895078	NO	NO
ENSG00000099219	ERMP1	0.0388404	NO	NO
ENSG00000099246	RAB18	0.0087777	NO	NO
ENSG00000099250	NRP1	0.0513552	NO	NO
ENSG00000099251		0.12426	YES	NO
ENSG00000099256	PRTFDC1	0.0444047	NO	NO
ENSG00000099260	PALMD	0.0801731	NO	NO
ENSG00000099282	TSPAN15	0.0175204	NO	NO
ENSG00000099284	H2AFY2	0.100268	NO	NO
ENSG00000099290	FAM21A	0.0120579	NO	NO
ENSG00000099308	MAST3	0.0503026	NO	NO
ENSG00000099326	MZF1	0.0232229	NO	NO
ENSG00000099330	OCEL1	0.027212	NO	NO
ENSG00000099331	MYO9B	0.00824714	NO	NO
ENSG00000099337	KCNK6	0.0624683	NO	NO
ENSG00000099338	CATSPERG	0.0162741	NO	NO
ENSG00000099341	PSMD8	0.0108728	NO	NO
ENSG00000099364	FBXL19	0.00824739	NO	NO
ENSG00000099365	STX1B	0.0962164	NO	NO
ENSG00000099377	HSD3B7	0.0337702	NO	NO
ENSG00000099381	SETD1A	0.0253331	NO	NO
ENSG00000099385	BCL7C	0.090117	NO	NO
ENSG00000099617	EFNA2	0.0535224	NO	NO
ENSG00000099622	CIRBP	0.111952	YES	YES	-2.756	-2.756	-2.756	-2.756
ENSG00000099624	ATP5D	0.0112126	NO	NO
ENSG00000099625		0.0335941	NO	NO
ENSG00000099769	IGFALS	0.0898515	NO	NO
ENSG00000099783	HNRNPM	0.00976805	NO	NO
ENSG00000099785	1998-02-01	0.0134216	NO	NO
ENSG00000099795	NDUFB7	0.010324	NO	NO
ENSG00000099797	TECR	0.0656249	NO	NO
ENSG00000099800	TIMM13	0.0779104	NO	NO
ENSG00000099804	CDC34	0.00741809	NO	NO
ENSG00000099812	MISP	0.0782947	NO	NO
ENSG00000099814	CEP170B	0.0325001	NO	NO
ENSG00000099817	POLR2E	0.00739651	NO	NO
ENSG00000099821	POLRMT	0.0117691	NO	NO
ENSG00000099822	HCN2	0.075613	NO	NO
ENSG00000099834	CDHR5	0.0924538	NO	NO
ENSG00000099840	IZUMO4	0.0452508	NO	NO
ENSG00000099849	RASSF7	0.0107156	NO	NO
ENSG00000099860	GADD45B	0.00846927	NO	NO
ENSG00000099864	PALM	0.0740485	NO	NO
ENSG00000099866	MADCAM1	0.0303289	NO	NO
ENSG00000099869		0.140145	YES	NO
ENSG00000099875	MKNK2	0.0234419	NO	NO
ENSG00000099889	ARVCF	0.00715768	NO	NO
ENSG00000099899	TRMT2A	0.0153976	NO	NO
ENSG00000099901	RANBP1	0.0989295	NO	NO
ENSG00000099904	ZDHHC8	0.134387	YES	NO
ENSG00000099910	KLHL22	0.0175075	NO	NO
ENSG00000099917	MED15	0.0125669	NO	NO
ENSG00000099937	SERPIND1	0.0242363	NO	NO
ENSG00000099940	SNAP29	0.00841007	NO	NO
ENSG00000099942	CRKL	0.0050748	NO	NO
ENSG00000099949	LZTR1	0.0982862	NO	NO
ENSG00000099953	MMP11	0.0243633	NO	NO
ENSG00000099956	SMARCB1	0.0242359	NO	NO
ENSG00000099958	DERL3	0.0454524	NO	NO
ENSG00000099960	SLC7A4	0.112601	YES	NO
ENSG00000099968	BCL2L13	0.0176493	NO	NO
ENSG00000099977	DDT	0.0466006	NO	NO
ENSG00000099985		0.117091	YES	YES	-2.34	-2.34	-2.34	-2.34
ENSG00000099991	CABIN1	0.00823987	NO	NO
ENSG00000099992	TBC1D10A	0.0187169	NO	NO
ENSG00000099994	SUSD2	0.0822588	NO	NO
ENSG00000099995	SF3A1	0.00633634	NO	NO
ENSG00000099998	GGT5	0.0783397	NO	NO
ENSG00000099999	RNF215	0.107767	YES	YES	-4.411	-4.411	-4.411	-4.411
ENSG00000100003	SEC14L2	0.0116523	NO	NO
ENSG00000100012	SEC14L3	0.0959344	NO	NO
ENSG00000100023	PPIL2	0.024946	NO	NO
ENSG00000100027	YPEL1	0.0451001	NO	NO
ENSG00000100028	SNRPD3	0.00920628	NO	NO
ENSG00000100029	PES1	0.0370648	NO	NO
ENSG00000100030	MAPK1	0.0111795	NO	NO
ENSG00000100031	GGT1	0.109672	YES	YES	2.88	2.88	2.88	2.88
ENSG00000100033	PRODH	0.0352128	NO	NO
ENSG00000100034	PPM1F	0.0320596	NO	NO
ENSG00000100036	SLC35E4	0.0222724	NO	NO
ENSG00000100038	TOP3B	0.0248604	NO	NO
ENSG00000100053	CRYBB3	0.034778	NO	NO
ENSG00000100055	CYTH4	0.0660541	NO	NO
ENSG00000100056	DGCR14	0.0113521	NO	NO
ENSG00000100060	MFNG	0.058907	NO	NO
ENSG00000100065	CARD10	0.0289123	NO	NO
ENSG00000100068	LRP5L	0.033571	NO	NO
ENSG00000100075	SLC25A1	0.00613352	NO	NO
ENSG00000100077	ADRBK2	0.0625622	NO	NO
ENSG00000100078	PLA2G3	0.094575	NO	NO
ENSG00000100083	GGA1	0.0056147	NO	NO
ENSG00000100084	HIRA	0.0172439	NO	NO
ENSG00000100092	SH3BP1	0.16114	YES	YES	-3.031	-3.031	-3.031	-3.031
ENSG00000100095	SEZ6L	0.111243	YES	NO
ENSG00000100097	LGALS1	0.069502	NO	NO
ENSG00000100099	HPS4	0.0297423	NO	NO
ENSG00000100100	PIK3IP1	0.0258442	NO	NO
ENSG00000100101		0.0323568	NO	NO
ENSG00000100104	SRRD	0.00895107	NO	NO
ENSG00000100105	PATZ1	0.00597595	NO	NO
ENSG00000100106	TRIOBP	0.0964755	NO	NO
ENSG00000100116	GCAT	0.0119299	NO	NO
ENSG00000100121	GGTLC2	0.0727766	NO	NO
ENSG00000100122	CRYBB1	0.0983396	NO	NO
ENSG00000100129	EIF3L	0.0752633	NO	NO
ENSG00000100138		0.0510815	NO	NO
ENSG00000100139	MICALL1	0.00702096	NO	NO
ENSG00000100142	POLR2F	0.0373865	NO	NO
ENSG00000100147	CCDC134	0.0211492	NO	NO
ENSG00000100150	DEPDC5	0.0199902	NO	NO
ENSG00000100151	PICK1	0.0701377	NO	NO
ENSG00000100154	TTC28	0.0446554	NO	NO
ENSG00000100156	SLC16A8	0.0659687	NO	NO
ENSG00000100162	CENPM	0.0168745	NO	NO
ENSG00000100167	1999-08-01	0.0417249	NO	NO
ENSG00000100170	SLC5A1	0.0821689	NO	NO
ENSG00000100181		0.18168	YES	NO
ENSG00000100191	SLC5A4	0.101914	NO	NO
ENSG00000100196	KDELR3	0.0312779	NO	NO
ENSG00000100197	CYP2D6	0.0727871	NO	NO
ENSG00000100206		0.0260018	NO	NO
ENSG00000100207	TCF20	0.0150444	NO	NO
ENSG00000100209	HSCB	0.0123111	NO	NO
ENSG00000100211	CBY1	0.0123284	NO	NO
ENSG00000100216	TOMM22	0.0115373	NO	NO
ENSG00000100218	RSPH14	0.0705106	NO	NO
ENSG00000100219		0.0203154	NO	NO
ENSG00000100220	RTCB	0.0453188	NO	NO
ENSG00000100221	JOSD1	0.0469192	NO	NO
ENSG00000100225	FBXO7	0.0261543	NO	NO
ENSG00000100226	GTPBP1	0.0083143	NO	NO
ENSG00000100227	POLDIP3	0.011759	NO	NO
ENSG00000100228	RAB36	0.0651202	NO	NO
ENSG00000100234	TIMP3	0.0818373	NO	NO
ENSG00000100239	PPP6R2	0.00831792	NO	NO
ENSG00000100241	SBF1	0.0169276	NO	NO
ENSG00000100243	CYB5R3	0.0208549	NO	NO
ENSG00000100246	DNAL4	0.0104555	NO	NO
ENSG00000100249	C22ORF31	0.0846205	NO	NO
ENSG00000100253	MIOX	0.103288	NO	NO
ENSG00000100258	LMF2	0.0154998	NO	NO
ENSG00000100263	RHBDD3	0.0082694	NO	NO
ENSG00000100266	PACSIN2	0.0085642	NO	NO
ENSG00000100271	TTLL1	0.0301657	NO	NO
ENSG00000100276	RASL10A	0.105298	YES	NO
ENSG00000100281	HMGXB4	0.0203216	NO	NO
ENSG00000100284	TOM1	0.0462544	NO	NO
ENSG00000100285	NEFH	0.1236	YES	NO
ENSG00000100288	CHKB	0.0593629	NO	NO
ENSG00000100290	BIK	0.0377342	NO	NO
ENSG00000100292	HMOX1	0.0600653	NO	NO
ENSG00000100294	MCAT	0.0299137	NO	NO
ENSG00000100296	THOC5	0.0283207	NO	NO
ENSG00000100297	MCM5	0.0483806	NO	NO
ENSG00000100298	APOBEC3H	0.0583991	NO	NO
ENSG00000100299	ARSA	0.00848035	NO	NO
ENSG00000100300	TSPO	0.0188323	NO	NO
ENSG00000100302	RASD2	0.0642275	NO	NO
ENSG00000100304	TTLL12	0.00896998	NO	NO
ENSG00000100307	CBX7	0.0212431	NO	NO
ENSG00000100311	PDGFB	0.0476963	NO	NO
ENSG00000100312	ACR	0.100883	NO	NO
ENSG00000100314	CABP7	0.100752	NO	NO
ENSG00000100316	RPL3	0.0160805	NO	NO
ENSG00000100319	ZMAT5	0.00865315	NO	NO
ENSG00000100320	RBFOX2	0.0096157	NO	NO
ENSG00000100321	SYNGR1	0.100569	NO	NO
ENSG00000100324	TAB1	0.0275848	NO	NO
ENSG00000100325	ASCC2	0.0135971	NO	NO
ENSG00000100330	MTMR3	0.0293389	NO	NO
ENSG00000100335	MIEF1	0.075625	NO	NO
ENSG00000100336	APOL4	0.0887848	NO	NO
ENSG00000100341	PNPLA5	0.104909	YES	NO
ENSG00000100342	APOL1	0.0479948	NO	NO
ENSG00000100344	PNPLA3	0.0535174	NO	NO
ENSG00000100346	CACNA1I	0.123203	YES	NO
ENSG00000100347	SAMM50	0.0204262	NO	NO
ENSG00000100348	TXN2	0.0195821	NO	NO
ENSG00000100350	FOXRED2	0.0298469	NO	NO
ENSG00000100351	GRAP2	0.181508	YES	NO
ENSG00000100353		0.00857302	NO	NO
ENSG00000100354	TNRC6B	0.0249109	NO	NO
ENSG00000100359	SGSM3	0.0158736	NO	NO
ENSG00000100360	IFT27	0.0220455	NO	NO
ENSG00000100362		0.121524	YES	NO
ENSG00000100364	KIAA0930	0.0282563	NO	NO
ENSG00000100365	NCF4	0.0841011	NO	NO
ENSG00000100368	CSF2RB	0.12484	YES	NO
ENSG00000100372	SLC25A17	0.0229504	NO	NO
ENSG00000100373	UPK3A	0.0522026	NO	NO
[truncated: 26,535 more rows]

## Sheet: Supplemental Table 6C
Protein Name	FDR<5%	d(i)	Geom mean of intensities in class 1	Geom mean of intensities in class 2	Fold-change (C1 vs Other)
PAI-1	YES	5.343	1.95	0.79	2.46
Cyclin_B1	YES	3.589	1.34	0.84	1.6
TFRC	YES	3.245	1.42	0.9	1.58
Fibronectin	YES	2.692	1.37	0.94	1.46
HSP70	YES	2.686	1.51	1.05	1.44
INPP4B	YES	2.954	1.29	0.9	1.43
4E-BP1	YES	3.675	1.36	0.96	1.42
Caspase-7_cleavedD198	YES	2.259	1.41	1.06	1.33
ASNS	YES	2.334	1.2	0.9	1.32
14-3-3_zeta	YES	2.09	1.23	0.95	1.3
FoxM1	YES	2.998	1.19	0.94	1.27
CD49b	YES	2.529	1.2	0.96	1.24
4E-BP1_pT70	YES	2.963	1.13	0.95	1.2
Stathmin	YES	2.457	1.17	1.01	1.15
Akt_pT308	YES	-2.253	0.92	1.08	0.86
B-Raf	YES	-2.183	0.8	1	0.8
Tuberin_pT1462	YES	-3.499	0.88	1.1	0.8
HER3	YES	-2.985	0.87	1.11	0.79
YAP_pS127	YES	-2.238	0.84	1.06	0.79
GSK3_pS9	YES	-2.311	0.79	1.02	0.78
E-Cadherin	YES	-2.151	0.74	0.98	0.76
PDCD4	YES	-2.722	0.89	1.19	0.75
Akt_pS473	YES	-3.086	0.87	1.19	0.74
PKC-pan_BetaII_pS660	YES	-2.81	0.85	1.15	0.74
Acetyl-a-Tubulin-Lys40	YES	-2.608	0.73	1.1	0.66
14-3-3_beta	NO
14-3-3_epsilon	NO
4E-BP1_pS65	NO
4E-BP1_pT37T46	NO
53BP1	NO
A-Raf_pS299	NO
ACC_pS79	NO
ACC1	NO
ACVRL1	NO
Akt	NO
AMPK_alpha	NO
AMPK_pT172	NO
Annexin-1	NO
Annexin_VII	NO
AR	NO
ARHI	NO
ARID1A	NO
ATM	NO
Bad_pS112	NO
Bak	NO
Bap1-c-4	NO
Bax	NO
Bcl-2	NO
Bcl-xL	NO
Beclin	NO
beta-Catenin	NO
Bid	NO
Bim	NO
BRCA2	NO
c-Jun_pS73	NO
c-Kit	NO
c-Met_pY1235	NO
c-Myc	NO
C-Raf	NO
C-Raf_pS338	NO
Caveolin-1	NO
CD20	NO
CD31	NO
CDK1	NO
Chk1	NO
Chk1_pS345	NO
Chk2	NO
Chk2_pT68	NO
cIAP	NO
Claudin-7	NO
Collagen_VI	NO
Cyclin_D1	NO
Cyclin_E1	NO
Cyclin_E2	NO
DJ-1	NO
Dvl3	NO
eEF2	NO
eEF2K	NO
EGFR	NO
EGFR_pY1068	NO
EGFR_pY1173	NO
eIF4E	NO
eIF4G	NO
ER-alpha	NO
ER-alpha_pS118	NO
ERK2	NO
ETS-1	NO
FASN	NO
FOXO3a	NO
FOXO3a_pS318_S321	NO
G6PD	NO
GAB2	NO
GAPDH	NO
GATA3	NO
GSK3-alpha-beta	NO
GSK3-alpha-beta_pS21_S9	NO
HER2	NO
HER2_pY1248	NO
HER3_pY1289	NO
Heregulin	NO
IGFBP2	NO
IRS1	NO
JNK_pT183_Y185	NO
JNK2	NO
Ku80	NO
Lck	NO
LKB1	NO
MAPK_pT202_Y204	NO
MEK1	NO
MEK1_pS217_S221	NO
MIG-6	NO
Mre11	NO
mTOR	NO
mTOR_pS2448	NO
MYH11	NO
Myosin-IIa_pS1943	NO
N-Cadherin	NO
N-Ras	NO
NDRG1_pT346	NO
NF-kB-p65_pS536	NO
NF2	NO
Notch1	NO
P-Cadherin	NO
p21	NO
p27	NO
p27_pT157	NO
p27_pT198	NO
p38_MAPK	NO
p38_pT180_Y182	NO
p53	NO
p62-LCK-ligand	NO
p70S6K	NO
p70S6K_pT389	NO
p90RSK	NO
p90RSK_pT359_S363	NO
Paxillin	NO
PCNA	NO
PDK1	NO
PDK1_pS241	NO
PEA-15	NO
PEA15_pS116	NO
PI3K-p110-alpha	NO
PI3K-p85	NO
PKC-alpha	NO
PKC-alpha_pS657	NO
PKC-delta_pS664	NO
PR	NO
PRAS40_pT246	NO
PRDX1	NO
PREX1	NO
PTEN	NO
Rab-25	NO
Rab11	NO
Rad50	NO
Rad51	NO
Raptor	NO
Rb_pS807_S811	NO
RBM15	NO
Rictor	NO
Rictor_pT1135	NO
S6	NO
S6_pS235_S236	NO
S6_pS240_S244	NO
SCD1	NO
SF2	NO
Shc_pY317	NO
Smad1	NO
Smad3	NO
Smad4	NO
Src	NO
Src_pY416	NO
Src_pY527	NO
STAT3_pY705	NO
STAT5-alpha	NO
Syk	NO
TAZ	NO
TIGAR	NO
Transglutaminase	NO
TSC1	NO
Tuberin	NO
VEGFR2	NO
VHL	NO
XBP1	NO
XRCC1	NO
YAP	NO
YB-1	NO
YB-1_pS102	NO
JAB1	NO
MSH2	NO
MSH6	NO

## Sheet: Supplemental Table 9
© 2000-2015 QIAGEN. All rights reserved.
Upstream Regulator	Exp Log Ratio	Molecule Type	Activation z-score	Target molecules in dataset
NFE2L2		transcription regulator	8.424	ABCC1,ABCC2,ABCC3,ABCC4,ACSL5,AHR,AKR1B10,ARF1,ATP1A1,BHMT,CAT,CCT7,CLPTM1L,CTSD,CXCL10,CXCL8,DAD1,DNAJB11,DSTN,DYNLL1,EIF2S1,EIF3C,EIF3G,EIF4G2,ELN,EPAS1,EPHX1,G6PD,GCLC,GCLM,GNB2L1,GPX2,GSPT1,GSR,GSTA4,GSTO1,HSP90AA1,HSP90B1,HTATIP2,IFRD1,IMPDH1,INMT,KCNMB4,L1CAM,LMNA,LPL,M6PR,MAFG,ME1,MEF2C,MGLL,MGST3,NARS,NCKAP1,NFE2L3,NQO1,PDIA4,PFN2,PGD,PRDX1,PSAT1,PSMA1,PSMA4,PSMA5,PSMA7,PSMB1,PSMB2,PSMB5,…
KEAP1		transcription regulator	-1.993	AHR,GCLC,NQO1,PRDX1
SMARCA4	0.75	transcription regulator	7.312	A2M,ABRACL,ACSL5,ACTN4,ADAM15,ADGRG1,AFP,AGT,AHR,AIM1,ALDH2,ANO1,ANXA10,ARHGDIB,ARL4C,ASNS,C8orf4,CCND1,CD74,CIITA,CLDND1,CLIC2,COL7A1,CPM,CPS1,CTSH,CUL4B,CYP1A1,CYP4B1,DDX18,DHRS9,DUSP4,DUSP6,EFNB1,EGR1,EPHB2,EREG,EVA1A,FBLIM1,FBP1,FGFR2,FGG,FHL2,FMO2,FOLR1,FOS,FOSL2,FOXA2,GADD45A,GAPDH,GCLC,GNAI3,GSTO1,GULP1,HEPH,HLA-DRA,HMGA2,HNMT,HPGD,ICAM1,IFI16,IGFBP5,IRF1,ITGA5,ITGAV,ITGB1,ITPR1,JUN,KCNS3,…
STAT3		transcription regulator	6.544	A2M,AGT,AHR,BMF,CCL20,CCNB1,CCND1,CD46,CD74,CDH5,CDK1,CEBPA,CEBPD,CIITA,CTSL,CTTN,CXCL10,CXCL8,DKK1,DVL3,ECT2,EGR1,EPAS1,FASN,FGA,FGB,FGG,FLRT3,FOS,FOXM1,FSCN1,GADD45A,GBP2,GIGYF1,HIF1A,HK2,HLA-DMA,HLA-DQA1,HLA-DRB5,HNRNPD,ICAM1,IFI16,IFIH1,IFIT3,IGF1R,IGFBP1,IGFBP5,IL1R1,IL1RN,IL2RB,IL6R,IL6ST,IRF1,IRF7,ITGAV,ITGB1,ITGB2,JAG1,KDR,KLF4,KRT17,LBP,LRP2,LTBR,MMP12,MUC1,MYC,NAMPT,NKX2-1,NOS3,NOTCH1,N…
STAT4		transcription regulator	6.491	ACSS1,AP2A2,C3,CCNL2,CXCL10,DNAJB6,ENO2,ERO1A,ETV5,FSCN1,FYB,GAS5,HILPDA,HLA-DQB1,IFIH1,IRF1,ITIH5,KDM6B,KLF9,KRT18,LTBP3,MAPK8IP3,MYC,NXN,PER1,PFN2,PKP2,PLOD2,PYGL,RGCC,RNF130,RRAD,SELENBP1,SERPINB5,SERPINE1,SH3BP4,SMURF2,SRPK1,STAT1,SYPL1,TIMP1,TPD52,VDAC1,WHSC1L1
SP1	1.17	transcription regulator	6.391	ACSL1,ACSS1,AGER,AKAP12,ALDH3A2,ALOX15B,ALPL,ASNS,ASS1,ATP2A2,ATP5B,B4GALT5,BACE2,CAT,CCL20,CCND1,CCND3,CCNG2,CD55,CD99,CDK1,CDK6,CEBPA,CEBPD,CIITA,CIRBP,CITED2,CKB,COL7A1,COL8A1,CRABP2,CTSD,CXCL10,CXCL5,CXCL8,CYBRD1,DHCR24,DLC1,EGR1,ENG,EREG,FASN,FOLR2,FOS,FOSL1,FOXM1,GDF15,GPX4,HDAC1,HDAC2,HIF1A,HK2,HMGA1,ICAM1,ID4,IGF1R,IGFBP1,IL2RB,IRF1,ITGAV,ITGB5,JUN,KDR,KIT,KRT16,KRT18,KRT19,LAMA1,LPL,LTBP…
HIF1A	1.42	transcription regulator	6.303	ACO1,ADAM10,ADAM15,AFP,AGT,AKAP12,ARPC2,ASNS,ATP2A2,AURKA,AXIN2,CA9,CABIN1,CCND1,CD164,CEMIP,CHKA,CITED2,CORO1A,CTSD,CXCL8,CYB5A,EGLN3,EIF4G1,EIF5A,ENG,ENO2,EPAS1,ERBB2,EREG,ERGIC1,ERO1A,FAM13A,FAM162A,FHL1,FHL2,FOS,FSCN1,GADD45B,GAPDH,GLYR1,GPI,H2AFX,HIF1A,HIF3A,HILPDA,HK2,HSPA4,IGFBP5,INHBB,ITGA5,ITGAV,ITGB2,ITPR1,JUN,JUP,KRT14,KRT18,KRT19,L1CAM,LDHA,LGALS1,LIFR,LOX,LOXL2,MEF2C,MMP1,MUC1,MYC,NB…
ARNT2		transcription regulator	6.245	ADAM28,AGER,AKR1B1,AQP4,CDH3,CELF2,COL11A1,COL12A1,EGR1,EIF5A,FKBP3,GALNT4,GTF3A,ICAM1,IFI16,IL6R,KCNJ15,KCNQ1,KRT5,LAMB3,LIFR,MCM7,MRPL37,PADI3,PGK1,PKIB,POSTN,RBL2,SELENBP1,SLC2A1,SMAD3,SRSF1,ST6GALNAC6,SYT7,TCF7L1,TSC22D3,TYK2,UGT1A6,ZFP36L1
SIM1		transcription regulator	6.164	ADAM28,AGER,AKR1B1,AQP4,CDH3,CELF2,COL11A1,COL12A1,EGR1,EIF5A,FKBP3,GALNT4,GTF3A,ICAM1,IFI16,IL6R,KCNJ15,KCNQ1,KRT5,LAMB3,LIFR,MCM7,MRPL37,PADI3,PKIB,POSTN,RBL2,SELENBP1,SMAD3,SRSF1,SST,ST6GALNAC6,SYT7,TCF7L1,TSC22D3,TYK2,UGT1A6,ZFP36L1
CTNNB1		transcription regulator	6.106	ABCC1,ACTN4,ACTR3,AFP,AHR,AIM1,AKAP13,ALCAM,ALDH3A2,ALG3,AOC3,APOD,AQP4,AQP5,ATP6V0A1,AXIN2,BMF,BMP1,CALM1 (includes others),CCND1,CD34,CD99,CELSR1,CFD,CLU,CRABP2,CRIP1,CTDSPL,CTHRC1,CTSF,CTSZ,CXCL8,CYB5A,CYB5R3,CYFIP2,CYP24A1,CYP2A6 (includes others),DDX17,DEFA5,DKK1,DKK4,EIF5A,ENO2,EPHB2,ERBB3,ETV1,ETV4,EYA2,F13A1,FOS,FOSL1,FOXA2,GADD45B,GJB1,GJB2,GLTSCR2,GPX2,GREM1,HDGF,HILPDA,HSPE1,HTATIP2,ID…
MYC	1.37	transcription regulator	5.583	ABCE1,ACAT1,ACSL4,ACSS1,ACTN1,ACTN4,AFP,AK2,AKAP1,AKAP12,ALCAM,AMD1,AQP1,ARAF,ARL6IP1,ASNS,ASS1,BCAT1,CAPN2,CCNB1,CCND1,CCND3,CCNG2,CD151,CD47,CDC20,CDCA7,CDK1,CDK6,CEBPA,CEBPD,CHKA,CKS2,CLDN7,CLIC4,CLU,CNBP,CNTNAP2,COBLL1,COL14A1,COL5A2,COL8A1,COX6B1,CPD,CPT1A,CRABP2,CRIP1,CTSD,CXCL10,CXCL8,CYCS,CYFIP2,DCTPP1,DDX18,DDX21,DDX5,DKC1,DKK1,DSP,DUSP1,DUSP4,DUSP5,DUSP6,EEF2,EFEMP1,EFTUD2,EGR1,EIF2S1,E…
XBP1		transcription regulator	5.578	ADAM10,AFP,ATF6B,ATP2A2,BET1L,CAT,COPB2,DAD1,DERL1,DNAJB11,DNAJC10,EDEM1,ERO1B,FASN,FKBP10,FKBP2,GGCX,GOLPH3L,HLA-DRA,HSP90B1,ICAM1,KLF4,LMAN1,LMAN2,MYC,ORMDL3,PDIA4,PGC,RPN1,RPN2,SEC23A,SEC61G,SMC3,SREBF1,SRPRB,SSR2,SSR4,SURF4,SYVN1,TFDP1,TFF2,TRAM1,TXNDC11,VAMP2
PGR		ligand-dependent nuclear receptor	5.566	ACOX1,ACP5,ACSL1,AKAP13,AKR1C3,AMD1,ARNT,CA12,CALD1,CAPN2,CCNB1,CCND1,CCND3,CDC20,CDC42BPA,CDK1,CEBPA,CEBPD,CKAP4,CLDN7,CTDSPL,DDX21,DPYSL2,DST,DYNLL1,EIF5B,ENC1,EPAS1,ERBB2,FAM89B,FOS,GAS6,GPR160,HBA1/HBA2,HIF1A,HPCAL1,HPGD,ICAM1,IGFBP1,IGFBP5,IL1R1,ITGA6,ITGB1,ITGB4,KLF4,KLF5,KLF9,KRT18,LAMB2,MVP,MYC,NEDD9,NFKBIA,PCNA,PDGFA,PFKP,PFN2,PLAU,PLK2,POSTN,PPIF,PPM1H,PRAME,RHOC,RUNX1,S100A8,S100P,SDC1…
PPARG		ligand-dependent nuclear receptor	5.535	ABCA3,ACAA1,ACAA2,ACOX1,ACSL1,ACSL4,ACSL5,AGPAT2,AGT,ALOX15B,AQP3,ATP2A2,C3,CAT,CCND1,CCPG1,CEBPA,CFD,CPLX2,CPT1A,CRABP2,CTSL,CXCL8,CYP4B1,DGAT1,DLK1,EGLN3,EIF4EBP1,ENO2,EPHX1,ERO1A,F11R,FABP3,FASN,FOSL1,FOXA2,GAPDH,HK2,IGFBP1,IGFBP5,IVD,JUN,KLF4,KLF6,KLK6,KRT18,KRT19,KRT20,LAMB3,LOC102724788/PRODH,LPL,LY6D,MCM7,MDH1,ME1,MGLL,MKI67,MKNK2,MMP14,MUC1,MUC13,NR1H2,NR4A1,OCLN,PC,PCK1,PCNA,PEX6,PHKB,PL…
KMT2D		transcription regulator	5.507	ADGRG1,B3GNT6,BTG3,CD55,CDCA7,CKAP4,CRIP1,CRIP2,CTSD,DKK1,ECHDC2,FABP3,FHL1,GPRC5C,GUSB,HAUS4,IRF1,LAMB3,LRRN4,MARVELD1,PCDH7,POLE,PTGR1,REEP6,SCARB1,SH3BGRL2,STXBP2,TFF1,TMEM159,TOX3,TRIQK
PPARGC1A		transcription regulator	5.455	ACADVL,ACAT1,ACOX1,ADGRG1,AK1,ATP5B,BCAT2,C3,CAT,CDC42EP1,CEBPD,COMP,COX5A,COX7B,CPT1A,CYCS,CYP1A1,CYP2A6 (includes others),CYP3A5,DGAT1,ERBB2,FABP3,FASN,FBXO32,GAS6,HK2,LDHA,LIFR,LPL,ME1,NCEH1,NDUFB5,PCK1,PGAM1,PLIN2,PMAIP1,PNPLA2,PRDX5,RXRA,SLC39A14,SOD2,SPARCL1,SREBF1,TRIB3,UQCRFS1,VAMP2
MITF		transcription regulator	5.379	ACP5,ACSL1,AIM1,ALCAM,ASAH1,ATP1A1,CCNB1,CCNG2,CD151,CENPF,CHKA,CLCN7,CXCL8,DAPK1,ECT2,FBXO32,FOS,HIF1A,HPGD,IL6R,KIFC1,KIT,MCM2,MCM4,MCM5,MCM6,MDH1,MGP,MMP14,NCAPD2,NR3C1,PPM1H,PPP2CA,RAB27A,SCARB1,SDC1,SEMA3C,SERPINE1,SOX9,SPAG5,STXBP1,TACC3,TMC6,TPSAB1/TPSB2,TPX2,TXNIP,UBE2C,UBL3,YAP1
IRF7	0.77	transcription regulator	5.357	CXCL10,FZD1,GBP1,GBP4,GBP5,IDO1,IFI16,IFIH1,IFIT3,IRF1,IRF7,NAMPT,OAS1,OAS2,OAS3,PARP12,PELI1,PLSCR1,PMAIP1,PSMB8,PSMB9,PSME2,S100A8,SAMD9L,STAT1,TAP1,TAP2,TMPO,UBA7,UBE2L6
HNF1A		transcription regulator	5.26	ABCC2,ADH1B,AFP,AGT,AK2,AKR1C1/AKR1C2,AKR1C3,ANPEP,APOH,AQP3,BMP3,BSDC1,C4BPA,CCND1,CD302,CD55,CDHR2,CLIC5,CTSZ,CYB5A,DPP4,DUSP6,ELF3,ETV5,FBP1,FGA,FGB,FOLR1,FOXA2,FUT3,FXYD3,GCNT3,GJB1,GNB2L1,GPR39,GPX2,HABP2,HGD,HHLA2,HNF1B,HNMT,HOPX,IGF1R,IGFBP1,KIF13A,LBP,MFI2,MID1IP1,MRPL15,MSH6,MT1X,MTHFD1,NRD1,PAH,PCK1,PCSK1,PFKP,PGK1,PIGR,PRR13,PSMA5,SEMA4A,SERPINE1,SLC40A1,SRC,TARS,TFRC,TMPRSS2,TPI1,UGT1…
MED1		transcription regulator	5.081	ACAA1,ACOX1,ANAPC5,AURKA,CCNB1,CCND1,CDC20,CDK1,CEBPA,CFD,CYP1A1,CYP24A1,CYP3A5,EDF1,ERBB2,FAM89B,FASN,FOXM1,GADD45A,HSD17B4,IGFBP1,IL2RB,KLF4,LBR,LY6D,MYC,NCL,NFKBIA,NR3C1,PIM1,PTMA,SCP2,SMARCA4,TFF1,TNNT1
JUN	0.72	transcription regulator	5.034	A2M,ACP5,AKAP12,ANXA2,ASNS,CAPN2,CCND1,CCND3,CD164,CDC20,CDK1,CLU,CTSL,CXCL1,CXCL10,CXCL16,CXCL5,CXCL8,CYCS,DARS,DKK1,DUSP1,EEF2,EIF4A1,EREG,FABP7,FBLN5,FLNC,FOLR2,FOS,FOSL1,FOXA2,GAS6,GCLC,HMGA1,HPGD,ICAM1,IFI16,IGF1R,IGFBP1,ITGAV,ITGB1,ITGB4,IVL,JUN,KRT16,LBP,LMNA,MMP1,MMP10,MMP12,MT2A,MTHFR,MYC,NFKBIA,NQO1,NTS,PCSK1,PKIB,PLAU,PLAUR,PPP2CA,PRDX1,PTGDS,RARA,RASGRF1,RHOB,RNF7,RXRA,SAA1,SDC1,SERPI…
CREB1		transcription regulator	5.03	ACHE,AKAP1,AKAP13,ARPC3,ATF5,ATP1A1,ATP6V0D1,BTG2,CADPS2,CCND1,CCND3,CDA,CEBPD,CIITA,CPD,CPT1A,CRYM,CSRNP1,CXCL8,CYFIP2,DOK4,DUSP1,EGR1,FAM46A,FASN,FGFR2,FOS,FOSB,FRMD6,GAA,GADD45A,GADD45B,GALNT1,GEM,HLA-DQB1,HLA-DRA,HMGCS1,HPCAL1,HPGD,HSPA4,IRF7,ITGBL1,JUN,KLF5,LAPTM4B,LPL,LSS,MARCKSL1,MEST,MFSD2A,MKNK2,MMP1,MYC,MYH10,NAB2,NDUFV1,NEURL1B,NKX2-1,NPC2,NR4A1,NRP1,PAM,PAX8,PCK1,PCNA,PCSK1,PER1,PLXNA…
AR		ligand-dependent nuclear receptor	4.934	ABCC4,ACTR3,AKR1C3,ALOX15B,AMD1,AQP3,ATAD2,ATP13A4,ATP2A2,BASP1,BMF,C3,C4A/C4B,CALU,CCND1,CIT,CKAP4,CLDN3,CLGN,CTSO,CUX1,DCTPP1,DHCR24,DNM1L,EGR1,EMB,ENO2,EPAS1,EPHX1,ERBB2,ERBB3,ERO1A,ETV1,FAM89B,FGFR2,FKBP4,FXYD3,GDF15,GLCCI1,GUCY1A3,GUSB,HSPH1,IGF1R,IGFBP5,IL1R1,ITGA6,ITGB4,KCNQ1,KIF2C,KITLG,KPNA2,KRT14,LMAN1,LRIG1,MAOA,MCM2,MCM4,MT1X,MTA2,MTHFD2,MUC1,MYC,NOTCH1,NR3C1,OCLN,P4HA1,PDGFA,PER1,PGC…
EGR2		transcription regulator	4.874	ABCC1,ASS1,CHKA,COL11A1,DMBT1,EGR1,EIF5B,ERBB2,FOS,GJB1,GNB4,HOXB3,ID4,IL6R,JUN,KDR,KITLG,NAB2,NCL,NOTCH1,POLR2C,PPP2CA,PRKCD,RALGAPA1,ROBO1,RRAD,SLC16A1,TCEB3,TFRC
RELA		transcription regulator	4.831	A2M,ACTN4,AFP,AGT,AHR,ALCAM,ARHGDIB,BTG2,C3,CCL20,CCND1,CIITA,CXCL1,CXCL10,CXCL5,CXCL8,DGCR6/LOC102724770,DUSP1,EGR1,ELF3,ELN,ERBB2,FCGRT,FOS,FSCN1,GBP1,GDF15,ICAM1,IL1RN,IRF1,IRF7,ITCH,JUN,KIT,MMP1,MUC1,MYC,NAMPT,NFKBIA,NOTCH1,NR4A1,OAS2,PCK1,PI3,PLAU,PSMB9,PTGDS,RORC,SAA1,SDC4,SERPINE2,SFTPA1,SOD2,SOX9,SREBF1,SYTL1,TAC1,TAP1,TAP2,TGFB1,TGM2,TLR2,TNFAIP2,TNFAIP3,TREM1,TRPC6,VASP,VIM
FOXO1		transcription regulator	4.759	A2M,ACSL5,ANLN,ATP5B,ATP5G3,ATP6V0A1,CCNB1,CCND1,CCNG2,CDC42EP3,CDK1,CDK5RAP3,CENPF,CITED2,CXCL10,CXCL8,CYCS,DAPK1,EFHD1,EGR1,FASN,FBXO32,FOS,FOSB,FOXA2,FOXM1,FOXP4,GADD45A,GADD45B,GPD2,GPI,ICAM1,IGF1R,IGFBP1,JAG1,JUN,KLF4,LPIN2,LPL,LTBR,MCM5,ME1,MMP1,MRPL14,MYC,NAMPT,NDUFA9,NOS3,PCK1,PIK3IP1,PLSCR1,PNPLA2,PRC1,PSMB8,RAB7A,RBL2,RPS6KA3,SCARB1,SERPINE1,SOD2,SREBF1,TGFB1,TKT,TNNT1,TRIB3,TXNIP
ESRRA		ligand-dependent nuclear receptor	4.709	ACADVL,ACOX1,ACSL1,ASAH1,ATP2A2,ATP5B,CHKA,CKB,CYB5A,CYCS,FABP3,GAPDH,HK2,HMGCS1,HSD17B4,LDHA,LPL,MTCH2,NDUFB5,PKM,PRKCD,SMARCA4,TFF1,TPI1,TRA2B
GLI1		transcription regulator	4.439	ACADVL,ARPC5,CCND1,CLU,CNIH4,DKK1,EMB,FHL1,FOXA2,FOXM1,FUCA2,GALNT2,GPC3,HNRNPU-AS1,IMPA2,JUP,KLF4,KRT19,LMNA,MEF2C,MEST,MRPS6,PDGFA,PIM1,PLOD1,PVR,RAB34,REG4,RHOB,RPL30,RPS6KA1,RXRA,S100A7,S100A9,SFRP1,SOX9,SYNE1,TFF1,TOM1,VIL1,VIM,WIF1
STAT1	1.48	transcription regulator	4.429	A2M,AGT,APOL6,C3,CCND1,CCND3,CEBPD,CIITA,CLIC5,CSF3R,CX3CL1,CXCL10,CXCL8,CYP3A5,DPP4,EGLN3,EGR1,FOS,GBP1,GBP2,GBP5,HIF1A,HLA-DRB5,ICAM1,IDO1,IFI16,IGF1R,IL1R1,IRF1,IRF7,JUN,KCTD12,MYC,OAS2,PDGFA,PIM1,PMAIP1,PSMB8,PSMB9,PSME2,PTN,RORC,RUNX1,SERPINA3,SERPINB3,SMAD3,SREBF1,STAT1,TAP1,TFF1,UBD,WARS
E2F1		transcription regulator	4.428	ACSL5,ACTR3,ADIPOR2,ALPL,ATAD2,AURKA,BOK,BUB3,CALD1,CALM1 (includes others),CCNB1,CCND1,CCND3,CCT2,CCT4,CDC20,CDK1,CEBPA,CITED2,CKB,CLIC1,CRABP2,CRIP2,CRKL,CSE1L,CTNNBIP1,CYB5A,DUSP1,DUSP4,ECT2,EGR1,ENO2,ERH,EYA2,FAM60A,FGFR2,FGFR3,FHL1,FKBP3,FOS,FOXM1,HLTF,HMGB1,HMGB2,HNRNPD,HNRNPR,HSP90B1,HSPD1,HSPE1,ICAM1,INMT,KDR,KIT,KRT14,LTA4H,MCM2,MCM3,MCM4,MCM5,MCM6,MCM7,MDH1,MMP1,MTHFD1,MYBL2,MYC,NCL,NCO…
ATF4		transcription regulator	4.353	ASNS,ATF5,BCAT1,CA9,CEBPG,EIF2S2,EIF4EBP1,ERO1A,FASN,GDF15,HSP90B1,IGFBP5,JAG1,JUN,KLF4,KLF9,MID1IP1,MT2A,MTHFD2,NARS,PHGDH,PRKDC,PSAT1,SHMT2,SLC38A2,SLC3A2,SLC7A1,SLC7A5,SREBF1,SST,TRIB3,WARS,XPOT
FOXM1	2.75	transcription regulator	4.35	AXIN2,CCNB1,CCND1,CDC20,CDK1,CENPF,CKS1B,FZD1,GLB1,KDR,LDHA,LOX,MYC,NBN,PDGFA,PGK1,PLAUR,PRC1,SFTPB,SFTPD,STMN1,TGFBR2,TOP2A,VCAN,VIM
ETS1		transcription regulator	4.325	ANPEP,ARHGDIB,ARL4C,ARPC2,B4GALT5,CCND1,CDH5,CITED2,CYP24A1,EEF1D,EGR1,ERBB2,GABRE,GSK3A,HPGD,HS2ST1,HSPE1,ICAM1,IGF2BP3,IL2RB,ITGB2,KRT8,MMP1,MYC,NOS3,NQO1,PERP,PLAU,PML,PVR,RUNX1,SERPINE1,SP1,SYVN1,TDP2,TGFA,TGFBR2,TYMS
REL		transcription regulator	4.305	ACSL4,ACSS2,AGA,AHR,ANLN,ATP11A,CAMK2D,CCND1,CIITA,CRKL,CXCL10,CXCL8,DDX18,DGCR2,EPHB2,ETV5,FOS,GADD45B,ICAM1,JUN,JUP,MAFG,MYC,NAB2,NFKBIA,NR4A1,PHGDH,PLA2G16,PLK2,PMAIP1,PTGDS,RAB40C,RORC,SOD2,TNFAIP3,UBE2Z,VIM
EPAS1	0.78	transcription regulator	4.292	ACP5,AKAP12,CA12,CA9,CAT,CCND1,CEMIP,CHKA,CITED2,CKB,CORO1A,CYBRD1,EGLN3,EIF5A,ENO2,FAM13A,FASN,FHL1,FMO5,FOS,GADD45B,HIF1A,HILPDA,HMGCS1,HSPA4,IGFBP5,INHBB,ITGAV,ITIH5,ITPR1,KDR,L1CAM,LDHA,LOX,LOXL2,MMP14,NOS3,NOTCH1,PKIB,PLIN2,PLOD2,SCGB3A1,SERPINE1,SFTPB,SFTPD,SLC11A2,SLC29A1,SLC2A1,SLC6A8,SLC7A5,SOD2,SOX9,SREBF1,TGFA,TMEM45A,TNFAIP3
NCOA3	1.2	transcription regulator	4.231	AHR,CCND1,CEBPA,CYP1A1,ERBB2,FGFR2,FOXM1,GJB2,HK2,IGF1R,IGFBP1,IRF1,KDR,LDHA,MCM7,MYH11,NCOA3,NFKBIA,PCNA,PDPK1,PGK1,PSMA2,SFTPB,SLC16A3,SLC2A1,TFF1
KLF4	1.72	transcription regulator	4.163	ALCAM,ALPL,CCNB1,CCND1,CD34,CLDN7,COBLL1,COL8A1,CRABP2,CXCL8,CYP1A1,DSP,DUSP1,DUSP4,DUSP5,EFEMP1,ETV1,EVPL,FARP1,FOXM1,GBP4,GJB2,IRX3,IVL,KDR,KLF4,KLK14,KRT14,KRT17,KRT19,LAMA1,MEF2C,MYH11,NCKAP1,NOTCH1,NRP1,NUDT21,PFKP,PLAUR,PPL,PPP2CA,SERPINE1,SOD2,SOD3,SPRR3,TEAD2,TF,TGFB1,TXNRD1,VIM,WLS,WNT5A,YAP1
ARNT	0.87	transcription regulator	4.118	AHR,ALDH7A1,CD81,CITED2,COX6B1,CTSD,CYP1A1,CYP2A6 (includes others),ENG,EPAS1,ERO1A,G6PD,GAPDH,GPI,HIF1A,HK2,ITGAV,LDHA,MYO1C,NOS3,NQO1,PGK1,RANBP1,RANGAP1,RGS5,SERPINE1,SLC2A1,TFRC,TPI1,TUBA4A,UBE2C,UGT1A6,VIM
ESR2		ligand-dependent nuclear receptor	4.111	AGT,AKAP1,AKAP12,AQP3,ATF5,ATP2B1,BCAT1,C3,CAPN2,CCND1,CDC42BPA,CEBPD,CLDN4,COL11A1,COMP,CPM,CRYZ,CTSD,CXCL8,DDAH1,DKK1,DNAH11,EGR1,EMB,EREG,FASN,FHL1,FOS,GCLC,GJB1,GLB1,GYG1,HMGA2,HPGD,HSD17B4,IGF1R,IVL,KLF4,KRT20,KRT8,LIMCH1,LMNA,LPL,LRP11,MKI67,MMP1,MMP14,MPP7,MYC,NEDD9,NFE2L3,OCLN,PCBD1,PCYOX1,PDGFA,PERP,PKIB,PLAUR,PLIN2,PMAIP1,PSAT1,PTGDS,PTPRH,PYGL,RALA,RARA,S100A9,SCARB1,SCGB3A1,SFRP4,SLC2…
SOX4		transcription regulator	4.065	AIF1L,ALDH1B1,ARNT,B3GNT5,CAPN2,CD74,CLIC6,DUSP4,EMB,FHL1,FOS,GGA2,HLA-DQB1,KYNU,LMO7,LY6D,MARCKSL1,NAV1,NUAK1,PNP,PTK2,PYGL,RARRES1,SERPINE2,SNX10,TES,TMEM98,UCHL1,VIM,VOPP1
CEBPA	0.56	transcription regulator	4.001	A2M,ABCA3,ACSL1,ADCY7,ADH1B,AGPAT2,AGT,AKAP12,AKR1B1,AKR1B10,AKR1C1/AKR1C2,AKR1C3,ANPEP,AQP5,ARL4C,ASNS,ASS1,BHMT,BTG2,C3,CCL20,CEBPA,CEBPD,CFD,CKAP4,CPS1,CPT1A,CRABP2,CSF3R,CXCL8,CYCS,CYP2A6 (includes others),CYP3A5,DDX21,EDF1,EEF1A2,EFNB2,EPHX1,EVPL,FASN,FHL1,FOS,FOXA2,FOXM1,FZD1,GADD45A,GAPDH,GBP1,GGH,GTF3A,HMGA1,HNF1B,HPGD,ICAM1,IL1RN,IL6R,ITGB5,IVL,JUN,KLF5,KLK14,KRT14,KRT17,LGALS1,LPL,MAPKA…
LHX1		transcription regulator	3.988	ANPEP,ASS1,BHMT2,DPP4,EHD2,FABP3,FBP1,GGT1,JAG1,KCNJ15,KLK6,LRP2,NAPSA,PAH,RBM47,SLC5A8
SREBF1	0.77	transcription regulator	3.983	ACSL1,ACSL4,ACSL5,ACSS2,CEBPA,CEBPD,CFD,CXCL10,CYB5A,DARS,DLK1,FASN,G6PD,GRSF1,GSR,HK2,HMGCS1,LPL,LSS,PCK1,PDPK1,PLS3,PMVK,PTGDS,RDH11,SC5D,SCARB1,SERPINE1,SREBF1,STXBP1,TF,TGFB1,TM7SF2,UQCRFS1
PAX7		transcription regulator	3.86	AHR,ASS1,ATP11A,C1QTNF3,CLDN3,CRLF1,DEPTOR,EMB,LMBRD1,LRPAP1,MEST,NFIX,NPNT,NQO1,PARM1,PRSS23,PTGR1,RNH1,SLC44A1
IRF3		transcription regulator	3.844	ABCC2,ADAM9,ANOS1,B4GALT5,CLIC4,CX3CL1,CXCL1,CXCL10,CXCL8,GBP1,GBP5,IFI16,IFIH1,IFIT3,IRF7,NR3C1,OAS1,OAS2,OAS3,PAH,PARP12,PMAIP1,PNP,SAMD9L,STAT1,TAP1,TMPO,TNFAIP3,UBE2L6
NR1I3		ligand-dependent nuclear receptor	3.731	ABCC2,ABCC3,ACOX1,AHR,CYP2A6 (includes others),CYP3A5,EIF4EBP1,EPHX1,GADD45B,HSD17B4,ICAM1,IL1R1,LRG1,MYC,NEDD9,PCK1,POR,PSMB7,PTPN11,RARRES1,SLC29A1,SREBF1,STEAP4,TMPRSS2,TNFAIP2,TUBA4A
PPARA		ligand-dependent nuclear receptor	3.691	ACAA1,ACAA2,ACADVL,ACAT1,ACOX1,ACSL1,ACSL5,ACSS2,ALDH2,ALDH3A2,ANAPC5,ANXA2,AQP3,ASNS,ASS1,ATP5B,AURKA,C3,CA9,CAT,CCNB1,CCND1,CDK1,CEBPA,CEBPD,CFI,CHKA,CPS1,CPT1A,CTSL,DYNLL1,F11R,FABP3,FASN,FGA,FGB,FGG,FOS,G6PD,GOT2,GPD2,H2AFX,H2AFZ,HADH,HIF1A,HILPDA,HLA-DQA1,HMGCS1,HSD17B4,IGFBP1,IGFBP5,IL1RN,KIF2C,KRT23,KRT8,LAMB3,LGALS4,LIFR,LPL,LSS,LY6D,MGLL,MGST3,MKI67,MPG,MYC,NFKBIA,OCLN,PAH,PC,PCK1,PCNA,P…
CEBPB		transcription regulator	3.674	AGT,AKR1B10,AKR1C3,ASNS,BHMT,C3,CCND1,CDC42EP3,CDH3,CEBPA,CFD,CHIT1,CPT1A,CSF3R,CXCL5,CXCL8,CYP1A1,CYP24A1,CYP2A6 (includes others),DAPK1,EFNB2,FGFR2,FHL1,FOS,FZD1,GADD45A,HMGA1,ICAM1,IGFBP1,IL1RN,INMT,IVL,JUN,KRT18,KRT6B,LBP,MCM3,MGP,MMP1,MMP10,MYC,NRP1,ORM1,PCK1,PCNA,PI3,PLXND1,PRKCD,PSMA3,SCARB1,SFTPD,SLC38A2,SLC7A1,SQRDL,SREBF1,SST,TAC1,TF,TGFB1,TMEM176A,TRIB3,TUBB3,UGT1A6,VCAN,VIM,XDH
IRF5		transcription regulator	3.666	CCL21,CXCL10,IFIH1,IFIT3,IRF7,NAMPT,OAS1,OAS2,PARP12,PLSCR1,PMAIP1,STAT1,TMPO,UBE2L6
IFI16	1.31	transcription regulator	3.625	CCL20,CCND1,CD81,CSF3R,CXCL10,CXCL8,CYP1A1,GADD45A,ICAM1,IFI16,IL1RN,IL2RB,KPNA1,LPL,MTHFD2,NFKBIA,OAS1,PCNA,PIM1,SFTPD
SMAD3	1.3	transcription regulator	3.576	CCND1,CCNG2,CDH5,CIITA,COL7A1,CXCL10,DAPK1,DEPTOR,DUSP4,EGR1,ELN,ENG,EREG,FOS,GADD45B,ITGB1,ITGB5,JAG1,JUN,JUND,MEF2D,MMP1,MMP12,MYC,PCNA,PMEPA1,POR,RHOB,SERPINE1,SFTPB,SMAD3,TF,TGFA,TGFB1,TIMP1,TPM1,TPM3,TPSAB1/TPSB2,VIM,ZFP36
MTPN		transcription regulator	3.552	APOD,CCND1,CEBPA,COL8A1,ENG,FOS,GAS5,GAS6,JUN,MYC,S100A8,SERPINE1,TGFB1
USF1		transcription regulator	3.524	AGT,AKAP12,CAT,CCNG2,CEBPA,CIITA,CPT1A,DUSP1,FASN,FBXO32,IGFBP1,P4HA1,PIGR,PRKAR1A,RORC,SERPINE1,SYNPO,TGFB1,TNFAIP3,TXNIP
MYB		transcription regulator	3.509	ANPEP,ATP2B1,CCNB1,CD34,CDK1,FOXJ1,IGF1R,IGFBP5,ITPR1,JUN,KDR,KIT,KITLG,KLF4,MYC,NRAS,PCNA,VIM
TP53		transcription regulator	3.429	A2M,ABCC1,ABCC2,ABHD4,ACAA2,ACADVL,ACAT1,ACSL3,ACTL6A,ACTN1,ACTN4,ADCK3,ADD3,ADGRB1,AFP,AHSA1,AK1,AKAP12,AKR1B1,ANLN,ANXA2,ANXA3,ANXA8/ANXA8L1,APOL1,AQP3,ARHGAP1,ARHGEF2,ARL6IP1,ASNS,ASS1,ATAD2,ATP1A1,ATP5C1,AURKA,AXIN2,BMF,BMP1,BOK,BTG2,CA9,CALU,CAMK2D,CAND1,CAP1,CAT,CCNB1,CCND1,CCND3,CCNG2,CD47,CDC20,CDC42BPA,CDC42EP3,CDH3,CDK1,CEBPA,CENPF,CERS6,CITED2,CKB,CKS1B,CLIC4,CLU,COL14A1,COL18A1,COL5A2…
HMGB1	1.16	transcription regulator	3.364	AGER,CCL20,CXCL5,CXCL8,FASN,HLA-DRB1,HMGB1,ICAM1,IL1R1,MMP1,SREBF1,TLR2
ERG		transcription regulator	3.354	ABCC4,ACTN1,ARFGEF2,ARHGAP31,ARHGEF2,AXIN2,CD164,CDC42BPB,CLIP1,COLGALT1,CXCL1,CXCL8,DSTN,EGFL7,FHL1,FLNC,FOSB,GFRA3,GMFB,GUCY1A3,HMGB1,HPCAL1,HPGD,ICAM1,ITGA6,MMP1,NOS3,PIM1,PLAU,PLAUR,PTPN11,PXN,RAB7A,RAPGEF5,RAPH1,RCAN2,RGS3,SVIL,TGFBR2,TMEM263,TMPRSS2,TSC22D3,UTRN,VWF
NFATC2		transcription regulator	3.353	ACP5,CCNB1,CISH,CITED2,CXCL10,GBP4,HDAC1,IFIT3,IRF1,IRF7,ITPR1,LDHA,LMO4,MYC,NR4A1,PELI1,PLK2,PML,PPP3R1,PTPRS,RAB10,SH3BP5,SLC3A2,SRC,STAT1,TGFB1
KLF5	1.32	transcription regulator	3.317	ACOX1,CCND1,CDK1,DUSP1,EPAS1,HIF1A,KLF5,KRT5,LAMA1,MYC,NOTCH1,PCNA,PDGFA,PREB,RUNX1,S100A9,SORCS2
TP73		transcription regulator	3.3	ADAM10,AFP,BTG2,CADM1,CCNB1,CCND3,CDK1,COL18A1,CTSD,CXCL1,DRAM1,EGR1,EREG,FASN,FGFR3,G6PD,GADD45A,IGFBP5,ITGA5,ITGB4,IVL,JAG1,KCNQ1,KIT,MMP14,MMP28,PERP,PMAIP1,PML,PRKDC,RRM2B,S100A2,SERPINA3,SERPINE2,SFN,STMN1,TAP1,TIMP1,TNFAIP2,TP53I11,TSC2,UBE2V1,YBX1,YWHAB
PPRC1		transcription regulator	3.266	CCL20,CXCL8,DUSP5,GDF15,GNG11,HK2,LAMB3,NAMPT,PHLDA1,RND3,ZFP36L1
EP300		transcription regulator	3.265	ACHE,ADAM12,AGT,AKAP12,AXIN2,BMF,CAMK2D,CCND1,CCND3,CCNG2,CDC42EP3,CEBPA,CHKA,CHPT1,CKB,CPT1A,CRABP2,CXCL8,CYP1A1,DUSP1,DUSP4,EGR1,EPHB2,ERBB2,EYA2,FASN,FNDC3B,FOSL2,GLCCI1,IGF1R,IL1R1,ITGA6,ITGB2,JUN,JUP,KDR,KRT14,KRT16,LAMA3,LAMC2,LDHA,LGALS3BP,LMNA,MAFG,MCM3,MEF2C,MKI67,MMP1,MYC,MYH11,NOTCH1,NR3C1,NR4A1,OAS3,PCK1,PDGFA,PERP,PRKCD,RBP1,RGL1,RORC,RPS6KA1,SDC1,SDC4,SFTPC,SLC7A11,SMOC1,SOD2,STOM,T…
ESRRG		ligand-dependent nuclear receptor	3.256	CYCS,FBXO32,GAPDH,HADH,HK2,KCNQ1,LDHA,LPL,NR3C1,NRP1,PCK1,PKM,TFF1,TPI1,VEGFB
SREBF2		transcription regulator	3.248	ACAA2,ACSL1,ACSS2,CYB5A,FASN,G6PD,HMGCS1,LSS,PLIN2,PMVK,RDH11,SC5D,SREBF1,TM7SF2
IRF1	1.3	transcription regulator	3.227	CCND1,CIITA,CXCL10,CXCL16,CXCL8,DST,EIF4A3,GBP2,IDO1,IFIH1,IFIT3,IRF1,IRF7,MAP4K4,MYC,OAS1,OAS2,PCDH7,PCNA,PIGR,PLA2G16,PML,PSMB8,PSMB9,PSME2,SP1,STAT1,TAP1,TAP2,TGFB1
NCOA1		transcription regulator	3.188	AHR,C3,CCND1,CEBPA,CYP1A1,FGFR2,GJB2,KDR,MYC,NFKBIA,PCK1,PDPK1,RPL36,SERPINB5,SERPINE1,SFTPA1,SFTPB,SLC2A1,SREBF1,TFF1
EHF		transcription regulator	3.184	ANPEP,ARNT,CCL20,CDH3,CDK1,CRABP2,CYP1A1,ERBB2,EREG,GLB1,IL1RN,JAG1,KDR,KLK5,KLK6,KLK7,MMP1,MUC1,PLAUR,S100A7,S100A8,S100A9,SAA1,SCEL,SERPINA3,SERPINE1,SPRR1B,SPRR2A,SPRR3,TIMP1,ZFP36L1
FOXA2	0.52	transcription regulator	3.119	A2M,ABCA3,AFP,C3,CCND1,CD55,CEBPA,CPT1A,DLK1,EPHX1,FGB,FOXA2,HADH,HK2,HNF1B,HPGD,IGFBP1,IGFBP5,LPL,MUC6,MYH11,NKX2-1,PCK1,PKM,PTGDS,RARA,RORC,SAA1,SCGB1A1,SFTPA1,SFTPB,SFTPD,SOD3,SST,TF
ATF2		transcription regulator	3.117	ARNT,ASNS,BCKDHA,CCND1,DUSP1,DUSP5,EGR1,FOS,GADD45A,JUN,MMP1,MT2A,NOTCH1,NTS,PCK1,PLAU,RHOB,SERPINB5,SOD2,SST
NCOA2		transcription regulator	3.092	AHR,CCND1,CFD,CXCL10,CYP1A1,EGR1,FAM89B,FGB,NFKBIA,PCK1,SFTPB,TFF1,TSC22D3
SMARCB1		transcription regulator	3.059	A2M,ACAT1,ACSL1,ACTR2,ADD3,AURKA,C4A/C4B,CCND1,CDK1,COL14A1,COL18A1,COL5A2,CTTN,DAPK1,DSC2,DSG2,ERBB2,F11R,FBP1,FOS,GADD45A,GJB1,GJB2,IFI16,JUP,LBP,MCM2,MCM3,MCM4,MCM5,MMP1,MYBL2,OAS1,OAS3,PC,PCK1,PELI1,PLXNB2,POSTN,PTN,RND3,SMC4,TFDP1,TFF1
HSF2		transcription regulator	2.985	CCT2,CCT4,CCT5,CCT6A,CCT7,CCT8,CLU,HIF1A,HSPA4,HSPB1,HSPH1,TCP1
NFKB1		transcription regulator	2.962	A2M,AKR1B1,BTG2,CCL20,CCND1,CIITA,CX3CL1,CXCL10,CXCL8,DUSP1,EGR1,ELF3,FCGRT,FGG,FOS,FSCN1,GBP1,GNAI3,GNB2L1,HLA-DMB,ICAM1,IKBKB,IL1RN,IRF1,ITPR1,JAG1,KRT6B,MMP10,MYC,NFKBIA,NR4A1,PDGFA,PI3,PLAU,SDC4,SOD2,SOX9,STAT1,SYTL1,TK1,TLR2,TNFAIP3
EGR1	0.75	transcription regulator	2.941	ACHE,ATP2A2,BAIAP2,CCND1,CDC20,CLU,CXCL8,DUSP4,EGR1,EIF4EBP1,FOSL1,GADD45A,GADD45B,GDF15,HPGD,ICAM1,IGF1R,JUN,JUND,ME1,MMP14,MYC,NAB2,NR4A1,PCSK2,PDGFA,PNPLA2,RRAD,SERPINE1,SOD2,TGFB1,TGFBR2,TIMP1
NFYA		transcription regulator	2.867	CAT,CCNB1,CDK1,COL11A1,CYP1A1,EGR1,EPHX1,FASN,FGFR2,GADD45A,GADD45B,HLA-DQB1,HLA-DRA,ICAM1,IRF1,JUN,JUND,LMAN1,NOTCH1,PGK1,PKM,PMAIP1,RHOB,RRM2,TGFBR2,TOP2A,TXNIP,VWF
HDAC6		transcription regulator	2.804	CYP1A1,HIF1A,JUN,LTBP2,MYC,PLAU,SERPINE1,TGFBI,VIM
TFEB		transcription regulator	2.798	ARSA,ATP6V0E1,CLCN7,CTSD,CTSF,NAGLU,NEU1,SCPEP1
KLF15		transcription regulator	2.792	ACADVL,ACAT1,ACOX1,ACSL1,ACSS1,FABP3,FASN,SYNPO
PRKCB		kinase	2.761	CCND1,CLCN7,CYCS,EGR1,FASN,FOS,ICAM1,JUN,MYC,SERPINE1,SLC6A3,SOD2,SREBF1,TCIRG1,TGFB1,TGFBR2
NFKBIA	0.79	transcription regulator	2.739	A2M,ACKR3,AK2,ALOX15B,ATP11A,BOK,BPIFA1,BTG2,C21orf33/LOC102724023,C3,CAPZA2,CCL20,CCNB1,CCND1,CDH3,CEBPD,CKS1B,CLU,COL5A2,CTSF,CTSZ,CX3CL1,CXCL1,CXCL10,CXCL8,DUSP6,EIF4G2,ERBB2,EREG,ERO1A,FCGRT,FHL2,FOS,FOXM1,FSCN1,GADD45A,GADD45B,GAS5,GBP2,HK2,HMGA1,HOXB2,ICAM1,IFI16,IL1RN,IRF1,IRX3,ITGAV,ITGB1,ITPR1,JUN,KLF5,KRT18,KRT8,LIFR,LIMA1,LYNX1,MGP,MMP1,MMP14,MMP15,MXD4,MYC,NAGLU,NFKBIA,NINJ1,NR4A1,PCD…
ELK1		transcription regulator	2.733	CCT8,EGR1,FOS,FOSL1,ITGAV,ITGB1,JUN,MTHFD2,SLC2A1,SLC7A11,ZFP36
ETS2		transcription regulator	2.72	ANPEP,CD34,ERBB2,FOS,HPGD,ICAM1,JUN,KRT18,MMP1,MYC,PLA2G16,PLAU,TDP2,TGFBR2
PSMD10		transcription regulator	2.646	CCND1,CXCL1,CXCL8,EIF4EBP1,ICAM1,IKBKB,PIK3R1
FOXO4		transcription regulator	2.644	CCNG2,CDC42EP3,DHCR24,FASN,GADD45A,GADD45B,HIF1A,HMGCS1,IGFBP1,JAG1,NAMPT,PSMD11,RBL2,SERPINE1,SLC2A1,SOD2
PLAG1		transcription regulator	2.64	AQP1,ATF5,CRIP2,CRLF1,EFNB1,ETV4,FLNC,GJB1,KRT19,MLXIP,PTP4A3,QSOX1,S100A2,TGM2,TPSAB1/TPSB2,TSPAN4
ESR1		ligand-dependent nuclear receptor	2.604	ABCA3,ABCA4,ABCC3,ACKR3,ACTR2,ADD3,AGT,AK1,AKAP1,AKAP13,ALCAM,ANAPC5,ANK3,ANLN,ANXA3,AP2S1,AQP1,AQP3,ARAF,ARHGAP1,ARHGEF2,ARRB1,ASS1,ATF5,ATP11A,ATP2B1,ATP6V0D1,AURKA,AXIN2,BCAT1,BET1L,BUB3,C3,C8orf4,CALD1,CAPN2,CCL20,CCNB1,CCND1,CCND3,CCNG2,CCPG1,CD55,CDC42BPA,CDC42BPB,CDC42EP3,CDK1,CDK6,CEACAM6,CEBPA,CEBPD,CEBPG,CENPF,CGN,CIT,CKB,CLDN4,CLIC3,CLIC6,CLN3,COL5A2,COL8A1,CPM,CRABP2,CREBBP,CRKL,CTSD,…
ETV1	0.77	transcription regulator	2.586	ACSL3,ERBB2,MMP1,SOX9,TGFBR2,TMPRSS2,VIM
TCF4		transcription regulator	2.574	AXIN2,CCND1,CDH17,DKK1,FOS,IGF2BP1,JUN,MYC,NCOR2,PLAU,SOX9,VCAN
JUNB		transcription regulator	2.567	C3,CCND1,CDC20,CLU,COL7A1,DARS,DUSP1,EEF2,FBLN5,FOSL1,HPGD,ITGAV,ITGB4,MMP1,MMP10,PLAU,PLAUR,PNPLA2,RASGRF1,SERPINE1,SFTPD,SLC7A1,SPRR1B,SST,SWAP70,TIMP1,VAMP8,YWHAG
SQSTM1		transcription regulator	2.566	CITED2,CYP2A6 (includes others),IRF1,JUN,NFKBIA,NQO1,PLK2,RGCC
NKX2-1	0.19	transcription regulator	2.55	ADGRF5,AGER,AGT,AQP1,AQP5,BTG3,CD74,CEBPA,CHAD,CHIA,CKS1B,CLU,EMP2,ENC1,ESAM,FXYD3,GLCCI1,HMGB2,HS2ST1,INMT,KITLG,LECT1,LMO3,LRG1,LRP2,MYH11,NAPSA,NOP56,PC,PFN2,QSOX1,ROS1,RRM2,SCGB1A1,SCGB3A2,SCNN1G,SERPINE1,SFTPA1,SFTPB,SFTPC,SFTPD,SLC34A2,TFF2
POU5F1		transcription regulator	2.541	AHR,ASH2L,B3GNT7,CCND1,CLDN7,COBLL1,CRABP2,DAPK1,DSP,DUSP1,DUSP4,DUSP5,EFEMP1,EVPL,FARP1,FOXA2,GADD45A,GBP4,HOPX,HOXB3,IGF1R,IGF2BP1,IRX3,KLF4,KLK14,KRT14,KRT17,MEF2C,MYBL2,NCKAP1,NKX2-1,NRP1,NUDT21,PMAIP1,PMEPA1,PPL,PPP2CA,RARA,SPRR3,SRC,TEAD2,TF,TGFB1,TNFRSF21,TXNRD1,VIM,WLS,WNT5A,YAP1,YES1
CREBBP	0.88	transcription regulator	2.519	ADAM12,AGT,AKAP12,CAMK2D,CCND1,CCND3,CDC42EP3,CDH5,CEBPA,CKB,CXCL10,CXCL8,CYP24A1,DUSP4,EGR1,ESAM,EYA2,FGFR3,FNDC3B,FOS,FOSB,FOSL2,GLCCI1,HLA-DRA,HMGCS1,IGF1R,IL2RB,IRF1,ITGA6,JUN,JUND,JUP,KRT14,LGALS3BP,LPL,MAFG,MCM3,MEF2C,MYC,NOTCH1,NR3C1,NR4A1,OAS3,PCK1,PCNA,PRKCD,PSMB9,RGL1,RPS6KA1,SDC1,SDC4,SERPINA3,SERPINE2,SFTPA1,SFTPB,SLC7A11,SMOC1,SREBF1,SST,STOM,TAP2,TFF1,TLE2,TLR2,TM2D2,TMPRSS2,TNFAIP3…
TBX2		transcription regulator	2.5	ANLN,ATF5,AURKA,CCNB1,CCNL2,CDK1,CKS1B,FOXM1,MCM2,MCM4,MCM5,MCM6,MCM7,NCAPD2,PRC1,TRIB3
BRCA1		transcription regulator	2.499	AK1,ANXA8/ANXA8L1,CCNB1,CCND1,CDH3,COL18A1,CTSD,CTSF,CYP1A1,EGR1,FHL2,FXYD3,GADD45A,GADD45B,GDF15,H2AFX,HMGA2,HNRNPD,HSPB1,IFIT3,IGF1R,IRF7,KRT17,KRT5,LAMA3,MYC,NEDD9,NQO1,PCBP2,PCNA,PERP,PHLDA1,PLSCR1,RBL2,ROBO1,RRM2B,RUVBL2,SERPINE2,SFN,SFPQ,SMAD3,STAT1,STC1,TAP1,TFF1,TNFAIP2
HNF4A		transcription regulator	2.491	ABCC2,ABCC3,ABCE1,ACAA2,ACAD8,ACAT1,ACOX1,ACSL1,ACTN1,ACTR3,ADCK3,ADCY7,ADGRB1,ADH1B,AFP,AGA,AGT,AHSA1,AK2,AKAP13,AKR1B1,AKR1C1/AKR1C2,AKR1C3,ALDH2,ANKHD1/ANKHD1-EIF4EBP3,ANPEP,AP2A1,APOH,AQP1,AQP3,ARHGEF19,ARL4C,ARPC5,ASAH1,ATF6B,AXIN2,BCKDHA,BHMT,BSDC1,C21orf33/LOC102724023,C3,C4A/C4B,C8orf4,CACNA2D2,CAMK2D,CAP1,CAPZA2,CCDC47,CCNB1,CCND1,CCNG2,CCT8,CD46,CD55,CDC42BPB,CDC42EP3,CDHR2,CDIPT,CDK1,C…
FOS	0.66	transcription regulator	2.479	A2M,ABCC1,ACOX1,ADAM12,ADNP,AGT,AKR1C3,ANK3,APLP2,AQP3,ARF1,ARNT,ARPC5,ASAP1,ATP2C1,B4GALT1,CADM1,CALU,CAMK2D,CAPN2,CAT,CCND1,CD164,CELF2,CERS4,CLIP1,CLU,COBLL1,COL18A1,CRABP2,CREBBP,CTSH,CXCL16,CXCL8,CYCS,DSG3,EGR1,EIF4G2,EMB,EREG,FASN,FBLIM1,FGA,FOLR2,FOS,FOSB,FOSL1,GAS5,GSR,HBA1/HBA2,HPGD,HSP90B1,HTATIP2,ICAM1,IGFBP1,IGFBP5,ITGA6,ITGB1,ITGB4,IVL,JUN,KIF5B,KITLG,KLF6,KLK12,KRT8,LAMA3,LGALS3BP,L…
MUC1	0.43	transmembrane receptor	2.472	CAT,CCND1,CXCL8,EGLN3,HIF1A,IKBKB,MKI67,NFKBIA,PDGFA,SOD2,VIM
E2F2		transcription regulator	2.449	CCNB1,CCND1,CCND3,CDK1,FGFR2,MCM2,MCM3,MCM4,MCM5,MCM6,MCM7,MYBL2,MYC,PCNA,RRM2,SERPINE1,TOPBP1
JUND	0.74	transcription regulator	2.437	AGT,CCND1,CLU,FOSL1,HPGD,ITGB4,IVL,JUND,MMP1,NR4A1,NTS,PLAU,PLAUR,SDC1,SFTPD,SPRR1B,SST,TIMP1,TK1
E2F3		transcription regulator	2.433	BOK,CCNB1,CCND1,CCND3,CDK1,FGFR2,HOXB9,MCM2,MCM3,MCM4,MCM5,MCM6,MCM7,MYBL2,MYC,PCNA,PPP1R13B,RRM1,SERPINE1,TK1,TOPBP1
THRB		ligand-dependent nuclear receptor	2.305	ACHE,ACOX1,ATP2A2,BTG2,CCNB1,CCND1,CCND3,CDK6,CEBPA,CFD,CPT1A,CTSD,CTSH,CXCL10,DAD1,DKK1,ENG,FASN,FOS,FOSL1,FZD1,HIF1A,JUN,LPL,ME1,NCOR2,NME1,NR4A1,NRAS,NRGN,PAM,PCK1,PCSK2,PER1,PGD,POR,PPP2CA,PTGDS,SFRP1,SFRP2,SFRP4,SREBF1,TCEA3,TGFB1,TGFBI,TLE2,TREM1,WIF1
CIITA	0.68	transcription regulator	2.279	CCND1,CD74,HLA-DMB,HLA-DOA,HLA-DPA1,HLA-DQA1,HLA-DQB1,HLA-DRA,HLA-DRB1
ETV4	0.61	transcription regulator	2.274	B4GALT1,B4GALT5,CXCL8,ERBB2,ETV4,GGT1,HPGD,JUP,KRT5,MMP14,TGFBR2,VIM
FLI1		transcription regulator	2.26	CCND1,CCND3,DDX21,EGR1,GNB2L1,MMP1,SNRPB,SRC,TCP1,TGFBR2
RBCK1		transcription regulator	2.236	CCNB1,CCND1,ICAM1,MYC,TNFAIP3
NCOA6		transcription regulator	2.236	FASN,FOS,LPL,SREBF1,SST
MAFF		transcription regulator	2.236	ABCC3,ABCC4,GCLC,NQO1,TXNRD1
NFIA		transcription regulator	2.232	CYP2A6 (includes others),EFNB1,LOX,PCK1,SFTPC
ATF1		transcription regulator	2.219	ATP1A1,CIITA,EGR1,FOSL1,JUN,NTS,PCNA,PCSK1,SOD2,SST,TGFBR2
SMARCD3		transcription regulator	2.219	ALCAM,CD151,DEPTOR,MGP,SOX9,WNT5A
RUVBL1	1.25	transcription regulator	2.219	ADAM15,AXIN2,ERGIC1,GADD45B,MCM3,MCM4,PCNA,ZDHHC9
USF2		transcription regulator	2.209	AGT,CPT1A,FASN,IGFBP1,LGALS3BP,MYC,P4HA1,PIGR,PRKAR1A,RORC,SERPINE1,TGFB1
PPARD		ligand-dependent nuclear receptor	2.188	ACAA1,ACAA2,ACADVL,ACOX1,ALDH2,ALDH3A2,AQP3,CDK1,CPT1A,FABP3,FABP7,FASN,FBP1,GAS6,GPD2,IGFBP1,LDHA,LGALS4,LPIN2,LPL,LRAT,MDFI,MFSD2A,PCNA,PCYOX1,PDPK1,PLIN2,PNPLA2,POP4,RBP1,SLC22A3,ST3GAL5,STAT1,TCEA3,UBC
MYBL2	2.85	transcription regulator	2.185	CCNB1,CCND1,CCNG2,CDK1,CEBPA,CLU,ELN,IGFBP5,ITGB1,MYBL2,MYC,SFTPA1,TOP2A
TAL1		transcription regulator	2.177	ARAF,ARSA,BHMT2,C3,CDH5,GSDMD,KIT,MUC1,MUC16,MYC,NOTCH1,PRSS8,PTPRU,SULT1A3/SULT1A4,TPSAB1/TPSB2,TTC3
RARB		ligand-dependent nuclear receptor	2.17	ADAM10,CDH5,CXCL8,EGR1,FOLR2,GADD45A,HNF1B,ICAM1,ITGAV,MMP1,RARA,SLC2A1,STAT1,STAT6,STRA6,TGFB1,UBA7,YES1
TWIST1		transcription regulator	2.12	ALCAM,APOD,CELSR1,CHAD,CLDN4,CLU,EFNB2,FCGBP,FGFR2,FGFR3,FOS,FOSL1,IGFBP1,IGFBP5,ITGB5,KIT,LMNA,LRG1,MMP1,MXRA8,OLFML3,PAM,PTPRU,RHOC,SDC3,TF,TGFB1,TGFBI,TGFBR2,TNFRSF21,VCAN,VIM,YBX1
RXRA	0.78	ligand-dependent nuclear receptor	2.105	ABCC2,ABCC3,ACOX1,ACSL1,ACSL3,ADH1B,AKR1C1/AKR1C2,ARL4C,ASNS,C3,CAT,CCL20,CCNB1,CCND1,CCND3,CEBPA,CEBPD,CLMN,CPT1A,CRABP2,CTSH,CXCL10,CYP24A1,CYP3A5,DLK1,ENG,EPHX1,FABP3,FASN,FGG,FOS,GCLC,HIF1A,HNF1B,HSD17B4,IGFBP1,LPL,MGP,MID1IP1,NEDD9,NME1,NRGN,PC,PCK1,PCSK2,PDPK1,PTGDS,RARA,RBP1,RORC,RXRA,SDC1,SFTPB,SREBF1,TGFB1,TK1,UGT1A7 (includes others)
HOXA5		transcription regulator	2.104	CXCL8,EGR1,GADD45B,IGFBP1,PTN,TGFB1
SP3		transcription regulator	2.096	ACSL1,AKAP12,ALOX15B,ASNS,BMF,CCL20,CCND1,CEBPA,CITED2,COL7A1,DUSP1,EGR1,EREG,FOS,FOSL1,GDF15,IGF1R,IL2RB,ITGB5,JUN,KDR,KRT16,LAMA1,LECT1,LPL,MSH6,MYH11,NOS3,PGK1,PKM,PLAU,PLAUR,PRKCD,SCARB1,SCTR,SERPINE1,SLC39A8,SOD2,SP1,SRC,SREBF1,STAT1,TFF1,TGFBR2,TIMP1,TLR2,TXNRD1,VIM
FOXO3		transcription regulator	2.08	AQP4,CAT,CCNB1,CCND1,CCNG2,CDC42EP3,CPT1A,CXCL10,CXCL8,EGR1,FASN,FBXO32,FOS,FOSB,FOXM1,GADD45A,GADD45B,IGFBP1,JAG1,MKI67,MTHFD2,MXD4,MYC,NAMPT,NFKBIA,NOS3,PIK3IP1,PLAU,PRDX5,RBL2,SLC40A1,SLC7A1,SOD2,TFF1,TXNIP,UBC,UBE2C,VIM,YBX1
HMGA1	1.7	transcription regulator	2.077	ALPL,CCND1,CTSH,EGR1,FOS,FOSL2,IGFBP1,KIT,KITLG,LAMA1,LAMB1,MAPKAPK2,MYC,NFIX,PTPRU,PVRL1,PYCR2,RAN,RARA,RHOB,SDC4,SOD3,TRIM28
SRF		transcription regulator	2.076	A2M,ABCA4,AKAP12,AMD1,CALD1,CAP1,CAPRIN1,CPA3,CPM,DSTN,DUSP5,EGR1,ETV1,EYA2,FAM60A,FHL1,FHL2,FOS,FOSB,FOSL1,GLRX3,HIF3A,ITGA6,ITGB1,JUN,LPL,LRP4,MAP4K4,MRPS35,MYH11,MYO1E,NR4A1,OPN3,PDLIM7,PTGR1,PVRL1,RFX5,RND3,RNH1,S100A8,S100A9,SEMA3A,SERPIND1,SKI,SLC2A1,SVIL,TMBIM4,TMOD3,TNNT1,VCL
SMAD4		transcription regulator	2.031	CCL20,CCND1,CCNG2,CDC42EP3,CDH3,CDH5,CELF2,CITED2,CLDN7,COL7A1,CTSD,CYB561,DAPK1,ENG,ERBB2,EREG,FAP,FOS,FSCN1,GADD45A,GADD45B,HMGA2,ITGA6,ITGB1,ITGB5,JAG1,LOC102724788/PRODH,MMP1,MYC,NAMPT,NFKBIA,PLAU,POR,RGCC,RUNX1,SAE1,SERPINE1,SFTPB,SMAD3,TGFB1,TIMP1,TPM1,TPM3,VIM,ZFP36
PPARGC1B		transcription regulator	2.013	ACADVL,ATP5B,C3,CCND1,COX5A,CYCS,DGAT1,DHCR24,EGLN3,ERO1A,FASN,HK2,LSS,MCM4,PCK1
GLIS1		transcription regulator	2	IVL,KLK7,S100A9,SPRR1B
ZBTB17		transcription regulator	2	BTG3,CCND1,CD46,EGR1,PMAIP1,RRM2B,ZFP36
GLI3		transcription regulator	2	CCND1,FOXA2,GREM1,H2AFX,NKX2-1,PVR,SFRP1,SOX9,WNT5A
T		transcription regulator	2	ALCAM,CD151,KDR,MGP,SOX9
YAP1	0.81	transcription regulator	1.998	ANLN,CCND1,CDK1,CDK6,FBXO32,FOXM1,IGF1R,MCM6,MYC,OCLN,PMAIP1,SDPR,SOX9,VIM
TCF7L2		transcription regulator	1.992	ACAA1,ALDH3A2,AQP3,AXIN2,CCND1,EPAS1,ERBB3,FBP1,LAMC2,MMP1,MYC,NKX2-1,PCK1,PKD1,SRPK1,SRSF1,YAP1
TCF7		transcription regulator	1.987	AXIN2,CEBPA,CEBPD,FOS,FOXA2,HNF1B,RARA,RORC,SRPK1,SRSF1
RARG		ligand-dependent nuclear receptor	1.977	CRABP2,DUSP1,EGR1,FOLR2,FOS,HNF1B,JUN,LAMB1,MYC,RARA,STRA6,TFF1,UBA7
NFATC1		transcription regulator	1.976	ACP5,CCND1,ICAM1,ITGAV,ITPR2,MYC,MYH11,PAG1,PLS3,PPP3R1,UTRN
PKNOX1		transcription regulator	1.969	COL5A2,FABP7,HOXB2,PBX2,PGK1,PLAU,SST
MAFG	1.19	transcription regulator	1.964	ABCC3,ABCC4,GCLC,GCLM,MAFG,NQO1,TXNRD1
SRY		transcription regulator	1.961	FOSL1,MAOA,PTGDS,SOX9
ZMIZ2		transcription regulator	1.958	AXIN2,CCND1,JUN,MYC
DDX5	0.91	enzyme	1.951	CCND1,FOS,FOSL1,JUN,MYC
DDX17	0.88	enzyme	1.951	CCND1,FOSL1,JUN,MYC
NR5A2		ligand-dependent nuclear receptor	1.95	ABCC3,AFP,CCND1,CEBPD,FASN,FGB,FOS,FOXA2,ICAM1,IGFBP1,JUN,MYC,PTGDS,SAA1,SCARB1
SOX17		transcription regulator	-1.969	AXIN2,CCND1,CDC42BPB,FOS,KDR
ING1		transcription regulator	-1.969	AFP,CCNB1,DEK,ZFP36
HEXIM1		transcription regulator	-1.974	CCND1,HIF1A,LOXL2,SLC2A1,TFF1,VIM
NCOR2	0.86	transcription regulator	-1.977	AXIN2,C3,CCND1,CEBPA,CXCL8,FOS,JUN,LPL,MMP12,RARA,TFF1
HOXA10		transcription regulator	-1.986	ALPL,AQP1,ATF6B,CFD,CSF3R,DHRS9,DKK1,DPP4,FKBP3,FZD1,GAS6,HLA-DQA1,HLA-DQB1,HLF,HNRNPL,HOXB3,HSP90AA1,IGFBP5,IL1R1,INMT,IRX3,KLF9,KRT18,ME1,MSN,NR4A1,PHGDH,PIGR,PIK3R1,PRKCD,RBP1,SCOC,STK17B,TNXB,TTC3,XDH,YWHAG
HIF3A	0.62	transcription regulator	-2	EPAS1,HIF1A,PGK1,SLC2A1
DACH1		transcription regulator	-2.035	CXCL8,EFEMP1,EGR1,FOS,JUN,KLF4,MEF2C,SERPINE1,TGFB1,TNFAIP3
VHL		transcription regulator	-2.044	ADGRG1,ARPC1A,CA12,CA9,CCND1,CFL1,CLDN4,EGLN3,EIF5,ENO2,EPAS1,HIF1A,ITGA5,LMNA,MMP14,PCNA,PMAIP1,PREB,RAP1B,RHOF,RUNX1,SEC61G,SLC16A3,SLC2A1,SLC40A1,SOD2,TFRC,TGFA,TYMS,VIM
NEUROG1		transcription regulator	-2.065	ADD3,ASS1,C3,CEMIP,CXCL1,DSP,EPAS1,FABP3,FAP,GREM1,LRIG1,MEST,MFAP4,PLK2,SDPR,SLC43A3,SPOCK1,SQRDL,SULF1
GATA3		transcription regulator	-2.107	BMF,BOK,CPA3,CRABP2,EVPL,FOS,FSCN1,KIT,KLF4,KLK14,KRT14,KRT17,LOC102724788/PRODH,LOX,MYC,NOTCH1,PCNA,PPL,RGCC,S100A8,S100A9,SPRR3,TFF1,VIM,ZBTB7B
CTBP1		enzyme	-2.158	ACKR3,CCNG2,DKK1,ENC1,FAT1,FOS,FSCN1,JUP,KRT8,OCLN,TMED4,VCAN
HMGN1		transcription regulator	-2.213	CCL21,EGFL7,FGA,FOS,FOSB,GP2,SOX9,SUMO1,TFF1
NAB2	0.69	transcription regulator	-2.213	FOS,ID4,NAB2,PLAU,RRAD,TGFB1
MAX		transcription regulator	-2.218	CCNB1,CCNG2,CYCS,DKC1,FBXO32,GADD45A,GADD45B,GLYR1,HDAC2,HK2,HMGA1,KLF6,MTHFD1,MYC,NCL,PTMA,RBBP7,RBBP8,SCPEP1,SERINC3,SLC2A1,TSC2,TXNIP,UBE2C,YBX1
HES1		transcription regulator	-2.218	CCND3,CEBPA,CFD,DLK1,GAA,NEU1,NOTCH1,PCNA,PTGDS,SST,TUBB3
GPS2		transcription regulator	-2.219	CCL20,CCND1,CXCL10,CXCL8,NFKBIA
SIN3A		transcription regulator	-2.236	CCNG2,CYP1A1,FBXO32,GADD45B,HLA-DRA,KLF6,MYC,NCL,PMM1,RBL2,S100A9,SET,TFF1,TXNIP
MNT		transcription regulator	-2.236	CCNG2,FBXO32,GADD45B,KLF6,NCL,TXNIP
E2F6		transcription regulator	-2.236	DCTN4,MCM2,MCM3,MCM5,MYC,PRKAR1A,RBBP8,RFX5,RRM2,SERPINE1,SRSF1,VKORC1L1
SNAI1		transcription regulator	-2.269	CD46,CD55,CDH5,CLDN3,CLDN4,CXCL8,FOS,FOSL1,HPGD,ITGB1,KRT17,KRT18,L1CAM,MUC1,OCLN,PEBP1,PFKP,RAB25,SDC1,TGFB1
TAF4		transcription regulator	-2.358	CCND1,CDH3,FOXA2,GAS5,GAS6,GJB2,GREM1,HOPX,IL1RN,ITGA6,KLF4,KLF5,KRT16,KRT6B,MAP3K6,MAP4K4,OAS1,OLFML3,PDGFA,PTN,RUNX1,TAOK2,TFF1,TGFB1
RB1		transcription regulator	-2.361	ALPL,ATAD2,BTG3,CCNB1,CCND1,CDK1,CEBPA,CITED2,CLDN3,CMAS,DCTN4,DEK,DLK1,EGR1,FOS,GMPS,HMGB2,IGF1R,IVL,KANK2,KDR,KIT,KPNA4,KRT18,MCM2,MCM3,MCM4,MCM5,MCM6,MCM7,MEF2C,MYBL2,MYC,OAZ2,PCNA,PMEPA1,PRKAR1A,RAB27A,RANBP1,RBL2,RRM1,RRM2,SERPINE1,SH3BP2,SLBP,TFDP1,TGFB1,TMPO,TOPBP1,TUBG1,TYMS
MXI1		transcription regulator	-2.37	CCNB1,FOXM1,MKI67,MTHFD2,MYC,SLC7A1
KLF2		transcription regulator	-2.429	ADAM15,ASS1,CCND3,CD1A,CD55,CEBPA,CXCL8,EFNA1,ELN,EPAS1,GADD45A,HIF1A,ITGB4,ITGB5,KDR,KITLG,LBP,MAPK9,MMP14,MT2A,MVP,MYC,MYH10,NFKBIA,NOS3,NQO1,PLOD2,PTGDS,RALA,RGS3,SERPINE1,SFTPD,SLC2A1,SLCO2A1,SMURF2,SOX9,SREBF1,STAT1,TFRC,TGFB1,TIMP1,UGDH,VWF
SPDEF		transcription regulator	-2.559	CD34,CLDN7,COL5A2,FOXJ1,FZD8,HIF1A,ITGA5,ITGA6,LAMB2,PLAU,PLAUR,SCGB1A1,SDC1,SERPINB5,SERPINE1,SFTPA1,SMAD3,TGFB1,VASP,VEGFB,VIM,WNT5A
ZEB2		transcription regulator	-2.59	ALPL,CCND1,ESRP2,KRT18,KRT19,NKX2-1,SFRP1
TRIB3	1.24	kinase	-2.596	ASNS,CEBPA,GDF15,MTHFD2,PMAIP1,PSAT1,TRIB3
GFI1		transcription regulator	-2.704	CEBPA,CREBBP,CXCL8,GUSB,ICAM1,IKBKB,IL1R1,IL6R,IRF1,JUN,LTBR,MYC,NFKBIA,SERPINA3,SMAD3,STAT1
TCF3		transcription regulator	-2.711	ANLN,ARAF,ARSA,AURKA,AXIN2,CCNB1,CCND3,CDH5,CDK6,ECT2,EIF4EBP1,FGFR2,FGFR3,GADD45A,GADD45B,H2AFX,JUN,JUND,KIF2C,KIT,KLF4,KLHDC2,LMO4,MEF2C,MKI67,MUC16,MYC,NOTCH1,PFKP,PGK1,PTPRU,RACGAP1,RORC,SLC7A5,SULT1A3/SULT1A4,TF,TOP2A,TYMS,WBP5
REST		transcription regulator	-2.759	ARRDC3,FAM105A,HPGD,L1CAM,NELL1,NPC2,NRP1,PCSK1,PHKB,SCG3,SCTR,SLC26A4,STMN2,SYT7,TAC1,TNNT1,TUBB3,UCHL1,VAMP2
RBL1		transcription regulator	-2.9	CCND1,CDK1,FOS,IVL,MCM2,MCM3,MCM5,MCM6,MCM7,MYBL2,MYC,NOTCH1,PA2G4,PCNA,RBL2,RRM1,RRM2,SFRP1,TYMS,VEGFB
GLIS2	0.67	transcription regulator	-3	C3,CCND1,CXCL10,LTBP2,MGP,MMP14,SERPINE1,TGFB1,VIM
NR0B2		ligand-dependent nuclear receptor	-3.24	ACOX1,AGT,CPT1A,EGR1,FASN,FBP1,PCK1,SCARB1,SERPINE1,SREBF1,TFF1,TIMP1
MEOX2		transcription regulator	-3.38	CCL20,CXCL1,CXCL8,EFNA1,ICAM1,ID4,ITGAV,ITGB5,MMP10,MMP14,PCNA,TNFAIP3
KDM5B		transcription regulator	-3.716	AURKA,BUB3,CCNB1,CCND1,CDIPT,CDK1,CYB5A,DHCR24,ECT2,EGR1,EIF5B,ERBB2,ERBB3,FGFR2,FHL1,GADD45A,GJB2,JADE2,KIF2C,LGALS3BP,LIMCH1,LRCH4,MAPK8IP3,MCM2,MCM3,MT1X,NEDD9,PLS3,PSME3,SCNN1A,SMARCA2,SNRPG,SOX9,SWAP70,TGFB1,TNFSF13,TOP2A
IRF4		transcription regulator	-3.787	ALPL,CCL20,CCNB1,CDK1,CIITA,CXCL10,ERBB3,GALNT2,GBP1,IL1R1,IL1RN,IRF1,IRF7,ITGB1,MAPK9,MAPRE1,OAS1,PCNA,PLAUR,PLSCR1,PSMA1,PSMA2,PTMA,RAB7A,RHOB,RORC,SLC2A1,SMARCA4,STAT1,TK1,TSPAN31,YBX1,YWHAH,ZFP36L1
SOX1		transcription regulator	-4.243	COBLL1,DSP,DUSP1,DUSP4,DUSP5,EFEMP1,FARP1,GBP4,IRX3,NCKAP1,NRP1,NUDT21,PPP2CA,TEAD2,TXNRD1,WLS,WNT5A,YAP1
SOX3		transcription regulator	-4.243	COBLL1,DSP,DUSP1,DUSP4,DUSP5,EFEMP1,FARP1,GBP4,IRX3,NCKAP1,NRP1,NUDT21,PPP2CA,TEAD2,TXNRD1,WLS,WNT5A,YAP1
GMNN		transcription regulator	-4.243	COBLL1,DSP,DUSP1,DUSP4,DUSP5,EFEMP1,FARP1,GBP4,IRX3,NCKAP1,NRP1,NUDT21,PPP2CA,TEAD2,TXNRD1,WLS,WNT5A,YAP1
TRIM24	0.77	transcription regulator	-4.732	CXCL10,CYP24A1,DDX60,EIF5A,EMB,FLRT3,GBP2,GBP4,HNF1B,IFIH1,IFIT3,IRF1,IRF7,LGALS3BP,MYH10,NUMA1,OAS1,PACSIN3,PARP12,PRPS2,PSMB8,PSMB9,SAMD9L,SERPINE1,STAT1,TAP1,TGFBI,TLR2,UBA7
CBX5		transcription regulator	-5.657	AKR1C3,ANKRD22,AXIN2,C15orf48,C9orf152,CDH17,CEMIP,CXCL5,GCNT3,HOXB6,KIT,KRT20,LAMB3,MAL2,MUC13,OAS1,PODXL2,PRR15L,PRSS23,PSMB8,QPCT,S100P,SELENBP1,SERPINA3,SLC2A10,SNTB1,TGFBI,TNFRSF6B,TRIM31,TSPAN13,TSPAN8,TXNIP

## Sheet: Supplemental Table 10
© 2000-2015 QIAGEN. All rights reserved.
Category	p-value	Molecules
Cellular Growth and Proliferation	3.68E-123-3.27E-11	LRG1,CCL20,FRMD6,SKAP2,POR,GLB1,TSC2,EXOC5,GNA13,EGLN2,CRKL,AGA,IGFBP5,ANXA2,CDH5,PSMA4,ALCAM,APOD,FHL1,GBP1,TP53I11,VEGFB,KCNQ1,ARRB1,ARRDC3,CLDN4,PFN2,HPN,MARCKSL1,SEMA3A,SWAP70,NR4A1,SFN,AKR1C3,SMAD3,ZFP36L1,RGCC,ETV1,CLDN7,F2,WIF1,TGFB1,C8orf4,JUND,GAS5,NUMA1,ALOX15B,NAGLU,EREG,ETV5,MDFI,APOH,HDGF,YBX1,SEC61G,TACC3,PTMA,AKR1C1/AKR1C2,PLAUR,PPM1G,MUC16,MEF2C,MAP4K4,HNRNPL,EIF3C,PPP2CA,TCIRG1,C…
Cell Death and Survival	2.36E-105-1.88E-11	ASS1,FRMD6,POR,TSC2,GNA13,EGLN2,CRKL,AGA,ANXA2,IGFBP5,CDH5,DST,PSMA4,ALCAM,APOD,TP53I11,VEGFB,KCNQ1,AQP3,ARRB1,CLDN4,RNF19A,HPN,KPNB1,SEMA3A,SWAP70,NR4A1,SFN,AKR1C3,SMAD3,ZFP36L1,CLDN7,F2,WIF1,TGFB1,C8orf4,JUND,GAS5,NUMA1,ALOX15B,NAGLU,EREG,ETV5,EIF2S1,CLIC4,HDGF,YBX1,DEFA5,PTMA,TACC3,SEC61G,PLAUR,PPM1G,MUC16,MEF2C,CYB5A,MAP4K4,EIF3C,TMBIM4,PPP2CA,KLK6,PTP4A2,TDP2,SFTPA1,RAB27A,TFDP1,MT1X,PTP4A3,…
Cellular Movement	7.24E-105-3.33E-11	AGER,GAS6,PIK3R1,CCL20,GSK3A,FRMD6,ANXA8/ANXA8L1,SKAP2,SPRY4,ELF3,CSE1L,TSC2,PLXNB2,GNA13,TNFRSF21,COMP,SLC2A1,CRKL,ITGA6,ANXA2,IGFBP5,CDH5,DST,ARPC2,ALCAM,RPS6KA1,CD34,ECT2,HTATIP2,FHL1,LTBP2,GBP1,PRDX1,VEGFB,ANPEP,SMARCA4,AQP3,ARRDC3,ARRB1,CNTNAP2,CLDN4,KHDRBS1,ANOS1,GREM1,ENG,PVR,LAMC2,HPN,MCM3,MARCKSL1,SEMA3A,SWAP70,TPI1,CRIP2,NR4A1,SOX9,SFN,DGKD,EEF1A2,SMAD3,RGCC,ETV1,RNF7,CLDN7,GPC3,F2,CTSD…
Organismal Survival	1.41E-65-1.4E-11	AGER,GAS6,ASS1,PIK3R1,FGG,STXBP2,SPRY4,POR,CCND3,CSE1L,TSC2,PLXNB2,GNA13,FBL,COMP,SLC2A1,CRKL,ITGA6,AGA,IGFBP5,ARAF,CDH5,ECT2,APOD,HTATIP2,LTBP2,PRDX1,KCNQ1,TAP1,SMARCA4,ARRB1,CLDN4,SCNN1B,KHDRBS1,TXNIP,GREM1,ENG,LAMC2,MARCKSL1,SEMA3A,DERL1,SOX9,SFN,ACTL6A,PRKACB,DGKD,AKR1C3,EEF1A2,SMAD3,ZFP36L1,ETV1,CLDN7,GPC3,ACHE,SC5D,F2,CTSD,DDX5,TGFB1,GPX4,CXCL8,ELN,STXBP1,NUMA1,HDAC2,TYK2,MUC13,AURKA,TXNRD1…
Cancer	5.02E-62-2.44E-11	ASS1,LRG1,CCL20,FRMD6,ANXA8/ANXA8L1,FGG,SKAP2,SLC39A8,POR,GLB1,TSC2,EXOC5,GNA13,DGCR2,EGLN2,CRKL,AGA,IGFBP5,ANXA2,CDH5,DST,ALCAM,ADH1B,TMEM43,PSMD1,RAB40C,PCBD1,APOD,DYRK2,FHL1,LTBP2,GBP1,TP53I11,VEGFB,KCNQ1,SNRPG,AQP3,ARRB1,CNTNAP2,ARRDC3,CLDN4,CLDND1,PFN2,SCNN1B,GPC6,RNF19A,LAMC2,HPN,KPNB1,MARCKSL1,SEMA3A,SWAP70,TPI1,DDX60,DERL1,NR4A1,ATP13A4,SFN,AKR1C3,SMAD3,ZFP36L1,RGCC,ETV1,CLDN7,F2,WIF1,TGF…
Organismal Injury and Abnormalities	5.02E-62-2.44E-11	ASS1,LRG1,CCL20,FRMD6,ANXA8/ANXA8L1,FGG,SKAP2,SLC39A8,POR,GLB1,TSC2,EXOC5,GNA13,DGCR2,EGLN2,CRKL,AGA,IGFBP5,ANXA2,CDH5,DST,ALCAM,ADH1B,TMEM43,PSMD1,RAB40C,PCBD1,APOD,DYRK2,FHL1,LTBP2,GBP1,TP53I11,VEGFB,KCNQ1,SNRPG,AQP3,ARRB1,CNTNAP2,ARRDC3,CLDN4,CLDND1,PFN2,SCNN1B,GPC6,RNF19A,LAMC2,HPN,KPNB1,MARCKSL1,SEMA3A,SWAP70,TPI1,DDX60,DERL1,NR4A1,GALNT4,ATP13A4,SFN,AKR1C3,SMAD3,ZFP36L1,RGCC,ETV1,CLDN7,F2,W…
Cellular Development	2.95E-58-3.27E-11	COL14A1,AGER,GAS6,PIK3R1,LRG1,CCL20,FRMD6,GSK3A,SPRY4,POR,ELF3,CCND3,CSE1L,TSC2,EXOC5,PLXNB2,CYP2A6 (includes others),GNA13,FBL,TNFRSF21,EGLN2,DAPK1,YWHAG,COMP,SLC2A1,CRKL,ITGA6,AGA,ANXA2,IGFBP5,PRPS2,PDLIM7,CDH5,ARAF,PSMA4,ALCAM,RPS6KA1,CD34,ECT2,UBE2C,APOD,FHL1,HTATIP2,GADD45B,GBP1,VEGFB,ANPEP,SMARCA4,AQP3,CNTNAP2,ARRB1,ARRDC3,CLDN4,PFN2,PLOD2,KHDRBS1,TXNIP,MAPK6,GREM1,ENG,HPN,SEMA3A,SWAP70,NR4…
Dermatological Diseases and Conditions	3.63E-56-3.3E-11	DPYSL2,COL14A1,TWF1,AGER,CCL20,GSK3A,ANXA8/ANXA8L1,CCND1,ATP2A2,POR,SOD2,CCND3,PRSS8,TSC2,CXCL1,FOSL1,IGFBP1,ITGB4,SERPINE1,HLA-DPA1,TYMS,IFIT3,COMP,YAP1,RRM2,ITGA6,TPM3,ANXA2,ARHGDIB,MARCKS,KLK7,ARPC1A,CTSL,DST,FSCN1,GAPDH,RPS6KA1,RXRA,PCBD1,EPHX1,APOD,ICAM1,GBP1,HLA-DQA1,CEBPD,CD74,AQP3,CD47,GADD45A,CDH3,TNXB,UBE2K,MMP1,PLA2G16,OAS1,CYP1A1,IVL,TXNIP,KRT17,MAPK6,LAMC2,KPNB1,FOS,SEMA3A,TPI1,LAMB3…
Reproductive System Disease	3.42E-54-1.96E-11	ASS1,FRMD6,ANXA8/ANXA8L1,FGG,POR,TSC2,GNA13,EGLN2,IGFBP5,ANXA2,CDH5,DST,ADH1B,ALCAM,APOD,DYRK2,FHL1,GBP1,VEGFB,CNTNAP2,ARRDC3,ARRB1,CLDN4,LAMC2,HPN,MARCKSL1,SWAP70,DDX60,TPI1,NR4A1,GALNT4,SFN,AKR1C3,SMAD3,RGCC,ETV1,CLDN7,F2,WIF1,TGFB1,SULT1A3/SULT1A4,JUND,ZWINT,CLIC2,ALOX15B,ETV5,MRPL15,EIF2S1,CLIC4,SEC14L1,KCNS3,MFI2,UGDH,YBX1,AKR1C1/AKR1C2,MMP28,PLAUR,ACADVL,MUC16,ORM2,MEF2C,SAMD9,HNRNPL,MCM6,E…
Cellular Assembly and Organization	1.17E-44-2.62E-11	COL14A1,TWF1,AGER,GAS6,PIK3R1,ANXA8/ANXA8L1,GLB1,TSC2,EXOC5,PLXNB2,GNA13,TNFRSF21,DAPK1,CRKL,ITGA6,ANXA2,PDLIM7,ARPC2,DST,RPS6KA1,ECT2,APOD,FHL1,LTBP2,ANPEP,SMARCA4,CNTNAP2,ARRB1,PFN2,RNF19A,GREM1,ENG,PVR,KPNB1,SEMA3A,SWAP70,SOX9,PRKACB,YWHAH,SMAD3,RGCC,ACHE,F2,CTSD,TGFB1,GPX4,CXCL8,ELN,NUMA1,HDAC2,TYK2,RDX,AURKA,PTPRM,NAGLU,HSPB1,ETV5,SULF1,LOX,SFTPC,FOXJ1,HDGF,YBX1,ERBB2,KRT20,SRC,THBS4,TACC3,P…
Cellular Function and Maintenance	1.17E-44-2.62E-11	COL14A1,TWF1,AGER,GAS6,PIK3R1,CCL20,ANXA8/ANXA8L1,SLC39A8,ELF3,BCAT2,GLB1,TSC2,PLXNB2,GNA13,TNFRSF21,DAPK1,SLC2A1,CRKL,ITGA6,AGA,IGFBP5,ANXA2,PDLIM7,CDH5,ARAF,ARPC2,DST,ERO1B,ECT2,APOD,GADD45B,LTBP2,VEGFB,KCNQ1,ANPEP,SMARCA4,AQP3,CNTNAP2,ARRB1,CLDN4,PFN2,SCNN1B,RNF19A,OAS1,TXNIP,GREM1,ENG,PVR,KPNB1,SEMA3A,SWAP70,NR4A1,SOX9,ATP13A4,PRKACB,YWHAH,SMAD3,ZFP36L1,RGCC,CLDN7,GPC3,ACHE,F2,CTSD,AK1,TGFB1,…
Cell Morphology	2.78E-43-8.95E-12	AGER,GAS6,PIK3R1,GSK3A,CCND3,GLB1,TSC2,EXOC5,PLXNB2,GNA13,TNFRSF21,YWHAG,CRKL,ITGA6,AGA,IGFBP5,ANXA2,CDH5,ARPC2,RPS6KA1,CD34,ECT2,UBE2C,LTBP2,PRDX1,KCNQ1,ANPEP,TAP1,SMARCA4,ARRB1,CNTNAP2,PFN2,FKBP3,TXNIP,ENG,PVR,HPN,MARCKSL1,SEMA3A,SWAP70,NR4A1,SOX9,PRKACB,YWHAH,SMAD3,RNF7,ACHE,F2,SC5D,CTSD,TGFB1,GPX4,CXCL8,HDAC2,TYK2,RDX,AURKA,PTPRM,NAGLU,HSPB1,ETV5,PEBP1,SULF1,LOX,SFTPC,SFTPD,FOXJ1,CLIC4,YBX1,E…
Cardiovascular System Development and Function	2.01E-39-3.95E-11	NELL1,MYH10,AGER,GAS6,XDH,PIK3R1,LRG1,RRM2B,GCLC,COL8A1,GSK3A,SERPINA3,NPTX1,ATP2A2,CCND1,CABIN1,SPRY4,POR,FHL2,SOD2,CCND3,CTSH,TSC2,MGP,FOSL1,CXCL1,PLXNB2,ITGB4,GNA13,TMSB10/TMSB4X,SERPINE1,TNFRSF21,EGLN2,YWHAG,COMP,YAP1,PAM,CRKL,ITGA6,RRM2,FGFR2,IGFBP5,ANXA2,HMOX2,MARCKS,CDH5,TFRC,ALCAM,ADIPOR2,RXRA,CD34,ECT2,STEAP3,CD99,FHL1,HTATIP2,ICAM1,GBP1,PRDX1,GDF15,VEGFB,ANPEP,SMARCA4,TGM2,CD47,GADD45A,…
Organismal Development	2.01E-39-2.14E-11	AGER,GAS6,PIK3R1,LRG1,CCL20,GSK3A,FGG,SPRY4,POR,ELF3,BCAT2,CCND3,CSE1L,GLB1,TSC2,PLXNB2,GNA13,EGLN2,DAPK1,COMP,YWHAG,CRKL,ITGA6,AGA,ANXA2,IGFBP5,CDH5,ARAF,ERO1B,ALCAM,ECT2,CD34,HTATIP2,FHL1,GBP1,PRDX1,VEGFB,KCNQ1,ANPEP,TAP1,SMARCA4,AQP3,ARRDC3,ARRB1,CNTNAP2,PFN2,SCNN1B,KHDRBS1,TXNIP,GREM1,ENG,LAMC2,HPN,SEMA3A,MARCKSL1,SWAP70,NR4A1,SOX9,SFN,PRKACB,SMAD3,ZFP36L1,RGCC,ETV1,CLDN7,GPC3,ACHE,F2,SC5D,CT…
Respiratory Disease	5.9E-39-2.11E-24	AGER,PCSK1,PIK3R1,RRM2B,CCND1,CLIP1,FGG,POR,SOD2,ELF3,CCND3,TSC2,CYP2A6 (includes others),ITGB4,SERPINE1,TMSB10/TMSB4X,TYMS,ALDH1B1,LRP2,RRM2,FGFR2,FUBP1,ANXA2,CERS4,GART,KLK7,ARAF,ALCAM,RXRA,ECT2,EPHX1,UBE2C,NME1,HTATIP2,FHL1,ICAM1,GADD45B,PRDX1,SCUBE2,HLA-DQA1,DDX17,TAP1,ANPEP,CNTNAP2,GADD45A,CLDN4,GPC6,MMP1,IVL,CYP1A1,RHOC,VIM,SLC29A1,SCGB1A1,GPI,PCSK2,TPI1,LAMB3,EIF4A1,NR4A1,SLC22A18,SOX9,SFN…
Infectious Diseases	4.31E-37-2.26E-11	LTA4H,HLA-DOA,TWF1,GAS6,PIK3R1,GCLC,CCL20,STXBP2,IFIH1,POR,CSE1L,GPD2,SUMO1,RUVBL2,CXCL1,SERPINE1,TYMS,FBL,KPNA4,IFIT3,SLC2A1,RRM2,FGFR2,FUBP1,ANXA2,KLK12,PIGR,ARHGDIB,ARPC1A,CTSL,ARAF,FSCN1,SUPT16H,BTG2,PSMA5,TFRC,GAPDH,RXRA,ATP6V0E1,ABCE1,UBE2C,DEK,AP2A1,LTBP2,ICAM1,GBP1,PRDX1,PLA2G10,ARL4C,GDF15,CEBPD,UBE2Z,CD74,DDX17,TAP1,ANPEP,TGM2,CD47,GLTSCR2,ACTR3,ARRB1,ARRDC3,CLDND1,PLOD2,OAS1,CYP1A1,KLH…
Immune Cell Trafficking	1.83E-35-1.56E-11	DPYSL2,HLA-DOA,KDM6B,AGER,GAS6,XDH,PIK3R1,CCL20,SERPINA3,NPTX1,CCND1,FGG,SOD2,FHL2,CTSH,CXCL1,GNA13,SERPINE1,TMSB10/TMSB4X,HLA-DPA1,TNFRSF21,CRKL,ITGA6,ANXA2,PIGR,CTSL,ALCAM,RXRA,CD34,CD99,DEK,ICAM1,PRDX1,PLA2G10,GDF15,HLA-DQA1,VEGFB,CD74,SMARCA4,TGM2,AQP3,CD47,ARRB1,GADD45A,CDH3,MMP1,CYP1A1,TXNIP,GREM1,ENG,PVR,SEMA3A,FOS,SCGB1A1,SWAP70,IMPDH1,ST3GAL4,QPCT,SMAD3,EEF1A2,GNB2L1,GPC3,ACHE,F2,TGFBR2,…
Tissue Morphology	6.1E-35-3.95E-11	COL14A1,AGER,PIK3R1,CCL20,POR,CCND3,CSE1L,GLB1,TSC2,PLXNB2,GNA13,TNFRSF21,SLC2A1,CRKL,ITGA6,AGA,IGFBP5,CDH5,ALCAM,ECT2,CD34,APOD,LTBP2,GADD45B,PRDX1,VEGFB,KCNQ1,TAP1,ANPEP,SMARCA4,AQP3,ARRB1,CNTNAP2,CLDN4,PFN2,SCNN1B,KHDRBS1,TXNIP,GREM1,ENG,LAMC2,HPN,SEMA3A,SWAP70,NR4A1,SOX9,SFN,PRKACB,SMAD3,ZFP36L1,GPC3,ACHE,SC5D,F2,CTSD,TGFB1,GPX4,ELN,CXCL8,HDAC2,TYK2,RDX,AURKA,FYB,TXNRD1,ALOX15B,NAGLU,EREG,HSP…
Endocrine System Disorders	2.27E-34-1.91E-11	AGER,GAS6,PIK3R1,ASS1,GSK3A,ANXA8/ANXA8L1,POR,ELF3,CCND3,FBL,IFIT3,DAPK1,ANXA2,FUBP1,GART,ARAF,ALCAM,RPS6KA1,CD34,ECT2,APOD,UBE2C,HTATIP2,PSMD7,PRDX1,VEGFB,KCNQ1,TAP1,SMARCA4,CNTNAP2,CLDN4,OAS1,TXNIP,ENG,LAMC2,HPN,DDX60,NR4A1,AKR1C3,EEF1A2,RGCC,CLDN7,ACHE,F2,CYFIP2,WIF1,TGFB1,CCT5,CXCL8,HDAC2,RDX,PTPRM,ALOX15B,NAGLU,HSPB1,SULF1,SFTPD,CLIC4,ALDH2,AGPAT2,ERBB2,STAT1,KRT20,SRC,CLIC5,RACGAP1,PLAUR,MU…
Tissue Development	5.27E-34-3.27E-11	COL14A1,TWF1,AGER,GAS6,PIK3R1,LRG1,GSK3A,FRMD6,SPRY4,POR,ELF3,CCND3,GLB1,TSC2,EXOC5,PLXNB2,GNA13,FBL,TNFRSF21,EGLN2,COMP,YWHAG,CRKL,ITGA6,IGFBP5,ANXA2,PDLIM7,CDH5,ARPC2,RPS6KA1,ECT2,CD34,APOD,UBE2C,FHL1,GADD45B,GBP1,VEGFB,ANPEP,SMARCA4,AQP3,ARRDC3,CNTNAP2,ARRB1,PFN2,KHDRBS1,TXNIP,GREM1,ENG,LAMC2,HPN,SEMA3A,MARCKSL1,SWAP70,NR4A1,SOX9,SFN,PRKACB,YWHAH,SMAD3,ZFP36L1,RGCC,RNF7,ETV1,GPC3,ACHE,F2,CTSD,…
Cell-To-Cell Signaling and Interaction	2.13E-33-2.49E-11	AGER,GAS6,PIK3R1,CCL20,GSK3A,FGG,STXBP2,PLXNB2,GNA13,TNFRSF21,DAPK1,COMP,CRKL,ITGA6,IGFBP5,ANXA2,CDH5,ALCAM,CD34,APOD,UBE2C,SMARCA4,TXNIP,GREM1,ENG,PVR,LAMC2,SEMA3A,SWAP70,NR4A1,SOX9,SMAD3,CCT2,RGCC,GPC3,ACHE,F2,CD164,CYFIP2,TGFB1,CCT5,ELN,CXCL8,STXBP1,TYK2,FYB,RAB34,PTPRM,ALOX15B,ETV5,LOX,SFTPD,APOH,FOXJ1,GALNT1,CLIC4,GGT1,PTGES3,ERBB2,STAT1,SRC,THBS4,PXN,TACC3,MMP28,ADAM15,PLAUR,CADM1,MUC16,CLU…
Connective Tissue Disorders	6.07E-33-1.65E-24	NELL1,HLA-DOA,AGER,XDH,CCL20,FGG,SLC39A8,IFIH1,SOD2,ELF3,CCND3,CXCL1,IGFBP1,HLA-DPA1,TYMS,CERS6,TNFRSF21,EGLN2,COMP,EEF2,FUBP1,IGFBP5,MYO1C,ARHGDIB,CTSL,TFRC,CD34,DEK,ICAM1,GADD45B,PRDX1,HLA-DQA1,GALNT2,CD74,TAP1,LBR,ARRB1,TNXB,C9orf152,MMP1,OAS1,MAPRE1,VIM,SLCO2A1,SPATS2L,FOS,GPI,NR4A1,ACTL6A,MAOA,MT2A,SMAD3,RGCC,SMS,TGFBR2,HMGB1,TGFB1,PPP3R1,SERPINB5,STK17B,PGK1,CXCL8,HDAC2,TYK2,IL6R,PTGDS,CCNB…
Skeletal and Muscular Disorders	6.07E-33-1.9E-11	TWF1,AGER,ASS1,PIK3R1,LRG1,CCL20,GSK3A,FGG,SPRY4,SLC39A8,POR,ELF3,CCND3,CSE1L,SYPL1,PLXNB2,FBL,TNFRSF21,IFIT3,EGLN2,COMP,CRKL,ITGA6,ANXA2,FUBP1,IGFBP5,PDLIM7,DST,PSMA4,ADH1B,ALCAM,TMEM43,CD34,UBE2C,APOD,DYRK2,FHL1,LTBP2,GADD45B,GBP1,PRDX1,TAP1,SMARCA4,ARRB1,PFN2,GPC6,PLOD2,OAS1,TXNIP,ENG,SPATS2L,SEMA3A,MARCKSL1,TPI1,NR4A1,SOX9,ACTL6A,PRKACB,SMAD3,EEF1A2,RGCC,GPC3,ACHE,SC5D,AK1,CYFIP2,TGFB1,JUND,C…
Inflammatory Disease	7.22E-32-3.3E-11	DPYSL2,NELL1,HLA-DOA,AGER,GAS6,XDH,MUC1,CCL20,FGG,SLC39A8,POR,IFIH1,SOD2,ELF3,CCND3,CXCL1,IGFBP1,SERPINE1,HLA-DPA1,TNFRSF21,CERS6,TYMS,EGLN2,TP53INP1,COMP,LRP2,EEF2,ITGA6,RRM2,TPM3,FGFR2,FUBP1,IGFBP5,MYO1C,ARHGDIB,KLK7,CTSL,PSMB1,TFRC,PSMD1,RXRA,CD34,DEK,GADD45B,ICAM1,PRDX1,HLA-DQA1,GALNT2,CD74,TAP1,LBR,CD47,ARRB1,GADD45A,TNXB,C9orf152,MMP1,IVL,CYP1A1,OAS1,KRT17,MAPRE1,VIM,SPATS2L,FOS,GPI,TPI1,IM…
Gene Expression	8.99E-32-5.45E-16	AGER,GAS6,PIK3R1,GSK3A,POR,ELF3,BCAT2,CCND3,CSE1L,TSC2,CYP2A6 (includes others),GNA13,DAPK1,YWHAG,ITGA6,IGFBP5,FUBP1,RPS6KA1,PCBD1,ECT2,HTATIP2,PRDX1,RBBP7,KCNQ1,SMARCA4,ARRB1,OAS1,KHDRBS1,TXNIP,GREM1,ENG,HPN,MARCKSL1,NR4A1,SOX9,PRKACB,YWHAH,SMAD3,ZFP36L1,CCT2,RGCC,ETV1,F2,DDX5,TCF25,TGFB1,JUND,CXCL8,HDAC2,RDX,FYB,TXNRD1,CAND1,EREG,ETV5,HSPB1,FOXP4,PEBP1,MDFI,LOX,DDX21,SFTPD,APOH,MRPL15,FOXJ1,EIF…
Inflammatory Response	1.06E-30-9.59E-12	AGER,GAS6,PIK3R1,CCL20,FGG,SPRY4,POR,ELF3,GNA13,TNFRSF21,CRKL,ITGA6,ANXA2,ALCAM,PSMD1,GADD45B,PRDX1,VEGFB,TAP1,ANPEP,SMARCA4,ARRB1,PFN2,TXNIP,GREM1,ENG,PVR,SEMA3A,SWAP70,TPI1,NR4A1,SFN,SMAD3,EEF1A2,RGCC,GPC3,ACHE,F2,CTSD,DDX5,TGFB1,GPX4,ELN,CXCL8,HDAC2,TYK2,RAB34,NAGLU,EREG,HSPB1,SFTPC,SFTPD,APOH,FOXJ1,CLIC4,GGT1,ALDH2,YBX1,ERBB2,STAT1,THBS4,SRC,PTMA,PXN,MMP28,ADAM15,PLAUR,CADM1,ACADVL,FCGBP,CLU,…
Hematological System Development and Function	4.74E-30-2.44E-11	DPYSL2,HLA-DOA,KDM6B,AGER,GAS6,PCSK1,PIK3R1,XDH,MUC1,CCL20,GSK3A,SERPINA3,NPTX1,CCND1,FGG,SOD2,FHL2,CCND3,CTSH,TSC2,SPTB,CXCL1,RUVBL2,IGFBP1,GNA13,SERPINE1,TMSB10/TMSB4X,HLA-DPA1,TNFRSF21,TP53INP1,SLC2A1,CRKL,ITGA6,FGFR2,GGCX,ANXA2,PIGR,ARHGDIB,CTSL,TFRC,ALCAM,RXRA,CD34,STEAP3,XRCC5,DEK,CD99,GADD45B,ICAM1,PRDX1,PLA2G10,GDF15,HLA-DQA1,VEGFB,CD74,TAP1,ANPEP,SMARCA4,LBR,TGM2,AQP3,CD47,ARRB1,GADD45A,…
Molecular Transport	5.68E-30-1.31E-12	AGER,PIK3R1,GSK3A,FGG,SLC39A8,POR,BCAT2,GLB1,CSE1L,TSC2,GNA13,SLC2A1,ANXA2,CDH5,ECT2,APOD,EPHX1,FHL1,LTBP2,KCNQ1,TAP1,AQP3,SCNN1B,KHDRBS1,TXNIP,ENG,KPNB1,NR4A1,AKR1C3,YWHAH,SMAD3,EEF1A2,RGCC,CLDN7,GPC3,ACHE,F2,SC5D,CTSD,AK1,TGFB1,CXCL8,STXBP1,TYK2,RDX,CLIC2,NAGLU,SFTPC,SFTPD,APOH,CLIC4,PTGES3,KCNS3,AGPAT2,FXYD3,ERBB2,STAT1,KRT20,CRYM,SRC,CLIC5,AKR1C1/AKR1C2,RACGAP1,SNTB1,CADM1,MEF2C,MAP4K4,CLU,HA…
Cell Cycle	6.24E-30-2.15E-11	MYH10,GAS6,PIK3R1,RRM2B,FRMD6,HAUS4,CCND1,CLIP1,FHL2,SOD2,EIF4G2,CCND3,CSE1L,KIF13A,TSC2,FOSL1,ITGB4,GNA13,TYMS,TP53INP1,YWHAG,YAP1,SCGB3A1,CSNK1D,FGFR2,IGFBP5,ANXA2,PCYOX1,MARCKS,PDLIM7,CDH5,ARAF,BTG2,TFRC,MXD4,RXRA,ECT2,XRCC5,UBE2C,DEK,NME1,GADD45B,PRDX1,PLA2G10,GDF15,HLA-DQA1,CEBPD,DDX17,SMARCA4,SPAG5,CCT4,ARRB1,GADD45A,RPS6KA2,KIF2C,PLA2G16,PRKDC,KHDRBS1,RHOC,TXNIP,MAPRE1,GSTA4,MAPK6,HNRNPD,N…
Connective Tissue Development and Function	4.09E-29-2.09E-11	MYH10,COL14A1,AGER,GAS6,XDH,PIK3R1,FRMD6,CCND1,SKAP2,FHL2,SOD2,CCND3,GPD2,SUMO1,TSC2,SPTB,FOSL1,CXCL1,GNA13,IGFBP1,SERPINE1,CERS6,TP53INP1,PAM,YAP1,CRKL,FGFR2,TPM3,ANXA2,SCP2,ARPC2,BTG2,PSMA4,TFRC,CD34,STEAP3,UBE2C,ICAM1,GADD45B,PRDX1,GDF15,CEBPD,CD74,SMARCA4,TGM2,CD47,ACTR3,ARRB1,GADD45A,PLIN2,MMP1,PRKDC,CYP1A1,KHDRBS1,TXNIP,MAPRE1,ENG,PVR,FOS,CHAD,GPI,SWAP70,SOX9,CFD,SMAD3,KLF6,GNB2L1,SKI,ETV1,…
Tumor Morphology	1.09E-28-4.6E-13	GAS6,PIK3R1,MUC1,SERPINA3,CCND1,FHL2,CCND3,TSC2,FOSL1,CXCL1,ITGB4,B4GALT5,IGFBP1,SERPINE1,TNFRSF21,DAPK1,ITGA6,FGFR2,ANXA2,IGFBP5,CTSL,CDH5,BTG2,ALCAM,RPS6KA1,RXRA,XRCC5,UBE2C,DYRK2,NME1,FHL1,ICAM1,GDF15,CD74,ANPEP,SMARCA4,CD47,YES1,GLTSCR2,ARRDC3,GADD45A,CLDN4,CDH3,FAP,MMP1,PMAIP1,TXNIP,VIM,GREM1,ENG,HPN,FOS,SCGB1A1,NR4A1,LDHA,SMAD3,GNB2L1,SKI,GPC3,F2,HMGB1,TGFBR2,MYC,CTSZ,RHOB,TGFB1,ADAM28,PIM1…
Protein Synthesis	3.14E-27-8.5E-15	PCSK1,PIK3R1,IGF2BP3,GSK3A,CCND1,SOD2,EIF4G2,EIF4EBP3,CTSH,SUMO1,TSC2,SCPEP1,FOSL1,IGFBP1,SERPINE1,EGLN2,DAPK1,PAM,EEF2,EIF5B,IGFBP5,PCYOX1,KLK12,CTSL,BTG2,GAPDH,UBE2C,ICAM1,DPM2,ANPEP,TGM2,ARRB1,RPS9,UBE2K,NRDC,PFN2,FAP,MMP1,CYP1A1,KHDRBS1,KRT17,HNRNPD,HPN,FOS,SWAP70,PCSK2,FAM129A,DERL1,EIF4A1,SOX9,EEF1A2,SMAD3,GNB2L1,SKI,ZFP36L1,PDPK1,PARP12,GPC3,ACHE,F2,MYC,CTSZ,CTSD,CYFIP2,PIM1,TGFB1,LPL,XPO1…
Gastrointestinal Disease	1E-25-1.35E-11	ASS1,LRG1,CCL20,FRMD6,SLC39A8,POR,GLB1,TSC2,GNA13,ANXA2,IGFBP5,CDH5,DST,ADH1B,ALCAM,PSMD1,RAB40C,APOD,DYRK2,FHL1,LTBP2,GBP1,VEGFB,KCNQ1,AQP3,ARRDC3,CNTNAP2,CLDN4,CLDND1,SCNN1B,RNF19A,GPC6,LAMC2,HPN,KPNB1,MARCKSL1,SEMA3A,SWAP70,DDX60,TPI1,DERL1,NR4A1,SFN,AKR1C3,SMAD3,RGCC,ETV1,CLDN7,F2,TGFB1,SULT1A3/SULT1A4,TMEM45A,ZWINT,NUMA1,INMT,CLIC2,ALOX15B,NAGLU,EREG,ETV5,SEC14L1,HDGF,KCNS3,MFI2,FXYD3,YBX1,C…
Embryonic Development	2.63E-25-1.86E-11	AGER,PIK3R1,CCL20,GSK3A,FGG,SPRY4,POR,ELF3,CCND3,CSE1L,GLB1,TSC2,PLXNB2,GNA13,SLC2A1,CRKL,ITGA6,ANXA2,IGFBP5,CDH5,FHL1,VEGFB,KCNQ1,SMARCA4,AQP3,CNTNAP2,ARRB1,ARRDC3,KHDRBS1,TXNIP,GREM1,ENG,LAMC2,HPN,SEMA3A,MARCKSL1,SWAP70,NR4A1,SOX9,SFN,PRKACB,SMAD3,ZFP36L1,ETV1,GPC3,F2,CTSD,TGFB1,GPX4,CXCL8,ELN,HDAC2,AURKA,TXNRD1,ALOX15B,NAGLU,EREG,HSPB1,FOXP4,MDFI,SFTPC,SULF1,LOX,SFTPD,FOXJ1,CLIC4,GGT1,PTGES3,H…
Developmental Disorder	1.3E-24-1.9E-11	MYH10,AGER,PIK3R1,RRM2B,GCLC,CCND1,ATP2A2,CABIN1,SPRY4,POR,FHL2,SOD2,EIF4G2,GPD2,SUMO1,TSC2,MGP,PLXNB2,GNA13,SERPINE1,TYMS,COMP,SLC2A1,YAP1,LRP2,CRKL,ITGA6,FGFR2,TPM3,GLRX3,CDH5,ARAF,PSMA4,TFRC,TMEM43,RXRA,XRCC5,FHL1,ICAM1,LTBP2,GDF15,VEGFB,KCNQ1,SMARCA4,LBR,DUSP5,GADD45A,CDH3,TNXB,EFTUD2,RPS6KA2,SCNN1B,GPC6,MMP1,PLOD2,KRT17,HNRNPD,ENG,SNCG,LAMB2,SEMA3A,MARCKSL1,FLNC,DERL1,MEF2D,GPX2,SOX9,AKAP1,P…
Immunological Disease	1.65E-24-3.3E-11	AGER,PIK3R1,CCL20,STXBP2,POR,CCND3,CSE1L,TSC2,GNA13,TNFRSF21,IFIT3,DAPK1,COMP,ITGA6,ANXA2,FUBP1,IGFBP5,GART,ALCAM,PSMD1,GADD45B,PRDX1,TAP1,SMARCA4,AQP3,ARRB1,FKBP3,OAS1,KHDRBS1,SPATS2L,KPNB1,SWAP70,TPI1,DDX60,NR4A1,ACTL6A,SMAD3,RGCC,TGFB1,CXCL8,HDAC2,TYK2,AURKA,FYB,RAB34,CLIC2,NAGLU,SFTPD,PC,ALDH2,ERBB2,STAT1,SRC,PTMA,PXN,PLAUR,APLP2,ACADVL,MUC16,MAP4K4,SAMD9,CLU,FCGBP,PPP2CA,TCIRG1,RAN,KLK6,ACP5…
Neurological Disease	1.21E-21-2.18E-11	COL14A1,AGER,PIK3R1,LRG1,GSK3A,FGG,GLB1,CSE1L,TSC2,SYPL1,FBL,SLC2A1,AGA,IGFBP5,ANXA2,FUBP1,GART,PDLIM7,ARAF,DST,PSMA4,ALCAM,ECT2,APOD,UBE2C,GBP1,PRDX1,VEGFB,SMARCA4,CNTNAP2,ARRB1,PFN2,PLOD2,OAS1,ENG,TPI1,NR4A1,SOX9,PRKACB,YWHAH,EEF1A2,ETV1,ACHE,SC5D,CTSD,AK1,CYFIP2,TGFB1,CXCL8,LAPTM4B,GAS5,HDAC2,HSPB1,ETV5,PEBP1,GGT1,EIF2S1,PTGES3,ALDH2,MFI2,ERBB2,CRYM,SRC,SEC61G,AKR1C1/AKR1C2,PLAUR,TSN,CADM1,APL…
Organ Development	4.53E-21-3.27E-11	MYH10,AGER,XDH,PIK3R1,GSK3A,CCND1,ATP2A2,POR,ELF3,SOD2,CCND3,PRSS8,TSC2,ITGB4,IGFBP1,SERPINE1,YAP1,CRKL,ITGA6,AGA,FGFR2,IGFBP5,KLK7,EVPL,CTSL,RXRA,APOD,FHL1,GDF15,CEBPD,VEGFB,SMARCA4,TGM2,AQP3,ARRDC3,CDH3,RPS6KA2,MMP1,PRKDC,IVL,TXNIP,KRT17,ENG,LAMC2,MARCKSL1,FOS,LAMB3,NR4A1,SOX9,SEMA3C,SFN,SMAD3,ZFP36L1,PDPK1,RNF7,GPC3,F2,TGFBR2,MYC,HMGB1,CTNNBIP1,DDX5,TGFB1,LECT1,PPP3R1,JUND,SERPINB5,HMGA2,CXCL8…
Skeletal and Muscular System Development and Function	4.53E-21-1.85E-13	NELL1,AGER,TCIRG1,XDH,PIK3R1,FNDC3B,NOS3,CCND1,CXCL10,PAK1,RASGRF1,FHL2,RARA,FOSL1,CXCL1,IGFBP1,SERPINE1,ITGB5,FBL,SFRP4,COMP,FBLN5,YAP1,RRBP1,ITGA6,FGFR2,ITGA5,IGFBP5,IRF1,PDLIM7,SFRP1,RXRA,NOTCH1,NRP1,APOD,FHL1,ABCC2,PTN,CEBPD,CTHRC1,VCAN,PRKCZ,SMARCA4,WTAP,TGM2,EFNB2,TRIB1,CD47,JUN,CDH3,CEBPA,IGF1R,MMP1,ITGB1,EGR1,GNAQ,GREM1,VIM,SERPINF2,SEMA3A,FOS,F11R,MEF2D,NR4A1,CRIP2,SOX9,PLAU,ID4,LRP4,IFI…
Hair and Skin Development and Function	2.05E-20-3.27E-11	KLK6,MKI67,ATP2A2,CCND1,CXCL10,HOXB3,PAK1,ELF3,CCND3,PRSS8,SUMO1,FOSL1,CXCL1,ITGB4,SERPINE1,ITGB5,AHR,SFRP4,DAPK1,FBLN5,TFDP1,YAP1,PTP4A3,ITGA6,AGA,ITGA5,FGFR2,L1CAM,IGFBP5,PLOD1,KLK7,EVPL,CTSL,FSCN1,CHKA,TFRC,KRT18,SFRP1,RXRA,LRIG1,ARHGAP1,ENC1,NOTCH1,NME1,ICAM1,PTN,TAC1,VCAN,SMARCA4,MAFG,EIF4EBP1,S100A7,TGM2,AQP3,KLF9,EFNB2,ARRDC3,ARRB1,JUN,GADD45A,CDH3,TRIM16,IGF1R,CEBPA,COL18A1,MMP1,CELSR1,IT…
Hematological Disease	4.34E-20-2.44E-11	MYH10,XDH,PIK3R1,RRM2B,MUC1,SERPINA3,CCND1,CLIP1,FGG,NCEH1,POR,SOD2,CCND3,GLB1,CSE1L,GPD2,TSC2,EXOC5,CXCL1,GNA13,ITGB4,SERPINE1,TMSB10/TMSB4X,TYMS,IFIT3,DAPK1,LRP2,RRM2,ITGA6,FGFR2,FUBP1,ANXA2,GART,CTSL,DST,BTG2,PSMB1,RPS25,DUSP4,PSMD1,RXRA,STEAP3,XRCC5,EPHX1,UBE2C,ANK3,DEK,CD99,NME1,ICAM1,GADD45B,PRDX1,GDF15,CPD,VEGFB,CD74,SMARCA4,DUSP5,YES1,CNTNAP2,GADD45A,EFTUD2,KIF2C,FKBP3,PLOD2,PRKDC,CYP1A1,…
Renal and Urological Disease	5.91E-20-6.27E-12	LTA4H,AGER,GAS6,PCSK1,PIK3R1,XDH,MUC1,IGF2BP3,RRM2B,CCND1,CLIP1,SLC39A8,POR,ELF3,SOD2,CCND3,BCAT2,TSC2,SPTB,FOSL1,CYP2A6 (includes others),GNA13,SERPINE1,HLA-DPA1,TYMS,IFIT3,LRP2,RRM2,FGFR2,AGA,ANXA2,IGFBP5,TPCN1,GART,CERS4,PDLIM7,CTSL,CDH5,ARPC2,BTG2,PSMB1,PSMD1,RXRA,PCBD1,CD34,UBE2C,HILPDA,ANK3,NME1,ICAM1,GDF15,CTDSPL,ANPEP,SNRPG,SMARCA4,AQP3,YES1,GADD45A,CLDN4,TNXB,PLIN2,RPS9,RPS6KA2,FAP,CYP1A…
Organismal Functions	1.71E-19-3.59E-18	MT2A,PER1,SMAD3,TFF1,SKI,KLF6,TPM1,SDC4,F2,MYC,HMGB1,PAK1,SCARB1,TGFB1,PPP3R1,POSTN,SERPINE1,SPRR3,C3,IL6R,AQP1,FGFR2,SLC3A2,SCNN1G,IL1RN,LIMA1,FGA,CX3CL1,ARHGAP1,EREG,VIL1,HSPB1,IL6ST,LOX,ICAM1,PDGFA,CLIC4,EFNB2,ARHGEF19,WLS,ERBB2,RASSF5,SCNN1B,PTK7,CELSR1,SDC1,KRT6B,ADAM15,EGR1,VIM,ENG,IL1R1,LAMC2,ITGB2,B4GALT1,TGFA,PLAU,WNT5A,PRKAR1A
Digestive System Development and Function	2.14E-19-4.21E-12	MYH10,TFF1,XDH,PIK3R1,RRM2B,CCND1,SPRY4,SOD2,CCND3,SUMO1,MTHFD2,ITGB4,IGFBP1,TP53INP1,CRKL,ITGA6,FGFR2,IGFBP5,PIGR,ASAH1,HMOX2,ARAF,SCP2,RXRA,XRCC5,CTHRC1,KCNQ1,SMARCA4,PRKDC,TXNIP,VIM,LAMC2,HNF1B,FOS,PCSK2,MAN2B1,SOX9,SMAD3,KLF6,SKI,ETV1,GPC3,RBP1,SC5D,F2,CTNNBIP1,TGFBR2,MYC,CTSD,TGFB1,LPL,JUND,GPR39,HDAC2,IL6R,KLF4,TLR2,PTPN11,DUSP1,FOXA2,NAGLU,FOXP4,HSPB1,IL6ST,RUNX1,SULF1,BHMT,MPG,RPS6KA3,FOX…
Lipid Metabolism	2.98E-18-8.09E-14	LTA4H,AGER,XDH,PIK3R1,GBP5,ATP2A2,POR,NCEH1,SOD2,BCAT2,GPD2,GLB1,TSC2,FOSL1,CXCL1,SERPINE1,CERS6,YWHAG,PAM,ACAA1,LRP2,ITGA6,FGFR2,ASAH1,HMOX2,CERS4,CDH5,SCP2,RXRA,ADIPOR2,APOD,EPHX1,ICAM1,PLA2G10,DPM2,GDF15,CD74,ANPEP,TGM2,AQP3,TNXB,PLIN2,SCNN1B,PLA2G16,PRKDC,CYP1A1,TXNIP,SLC35A2,VIM,SLCO2A1,ENG,TRIB3,FOS,SEMA3A,NR4A1,MAN2B1,ABCC3,PTGR1,CFD,DGKD,AKR1C3,ABCA3,EEF1A2,SMAD3,ETV1,CLDN7,RBP1,TSC22D3,S…
Small Molecule Biochemistry	2.98E-18-4.59E-12	LTA4H,AGER,ASS1,XDH,PIK3R1,GBP5,ATP2A2,POR,NCEH1,SOD2,BCAT2,GPD2,GLB1,TSC2,FOSL1,CXCL1,SERPINE1,CERS6,YWHAG,PAM,ACAA1,LRP2,ITGA6,FGFR2,ASAH1,HMOX2,CERS4,CDH5,SCP2,RXRA,ADIPOR2,CD34,APOD,EPHX1,ICAM1,PLA2G10,DPM2,CPD,GDF15,CD74,ANPEP,TGM2,AQP3,TNXB,PLIN2,SCNN1B,PLA2G16,PRKDC,CYP1A1,TXNIP,SLC35A2,VIM,SLCO2A1,ENG,TRIB3,FOS,SEMA3A,NR4A1,MAN2B1,ABCC3,PTGR1,CFD,DGKD,AKR1C3,ABCA3,EEF1A2,SMAD3,KLF6,PDPK1,…
Metabolic Disease	6.29E-18-1.35E-11	DPYSL2,HLA-DOA,AGER,GAS6,PCSK1,XDH,PIK3R1,SERPINA3,CCND1,ATP2A2,NPTX1,IFIH1,SOD2,GPD2,CTSH,TSC2,MGP,IGFBP1,SERPINE1,HLA-DPA1,IFIT3,PLD3,SLC2A1,EEF2,CSNK1D,FGFR2,IGFBP5,PSMB7,CTSL,SCP2,BTG2,PSMB1,ANAPC5,GAPDH,PSMD1,ADIPOR2,CD34,APOD,ICAM1,PSMD7,PRDX1,PLA2G10,GDF15,HLA-DQA1,CEBPD,CTHRC1,VEGFB,CD74,KCNQ1,TAP1,TGM2,CD47,CNTNAP2,TNXB,PLIN2,UBE2K,MMP1,PRKDC,OAS1,TXNIP,VIM,NRGN,TRIB3,SLCO2A1,HPN,HNF1B,F…
Organ Morphology	8.97E-18-8.94E-14	MYH10,RRM2B,HEPH,NOS3,CCND1,ATP2A2,CABIN1,POR,SOD2,CCND3,RARA,GAA,TCEB3,GNA13,ITGB4,AHR,IL2RB,EGLN2,FBLN5,CRKL,ITGA6,FGFR2,AGA,HMGA1,AKAP13,EVPL,CDH5,DNAH11,RXRA,LRIG1,NOTCH1,CD34,PCBD1,AKAP12,TAC1,MYH11,TGM2,EFNB2,DSG3,YES1,JUN,PDLIM5,IGF1R,PVRL1,VCL,RPS6KA2,COL18A1,CITED2,CELSR1,ITGB1,KRT6B,KRT17,TXNIP,EGR1,KRT5,SLCO2A1,LAMC2,EFNA1,KITLG,ITGB2,MARCKSL1,SEMA3A,BMF,FKBP4,ADAM10,DVL3,DGAT1,NCOR2,N…
Psychological Disorders	4.85E-17-5.42E-12	DPYSL2,AGER,PIK3R1,LRG1,SERPINA3,ATP2A2,NPTX1,FGG,IFIH1,SOD2,CSE1L,GPRC5C,BAIAP2,SYPL1,B4GALT5,ITGB4,SERPINE1,FBL,PLD3,SLC2A1,EEF2,TPM3,ANXA2,VAMP2,ARHGDIB,HMOX2,PDLIM7,SCP2,GAPDH,APOD,NME1,ICAM1,GBP1,PRDX1,SCUBE2,CD74,TGM2,DUSP5,MAL2,GADD45A,PFN2,MMP1,PLOD2,PRKDC,MLF2,NRGN,VIM,SLCO2A1,SNCG,FOS,GPI,TPI1,MEF2D,NR4A1,SOX9,LDHA,ID4,MAOA,QPCT,MT2A,PRKACB,CFD,VPS35,ATP2B1,EEF1A2,GNB2L1,ACHE,TSC22D3,SC…
Protein Degradation	7.85E-17-7.85E-17	PPP2CA,CTSO,PCSK1,PIK3R1,KLK6,CD46,SOD2,CTSH,SUMO1,SCPEP1,IGFBP1,FBXO32,SERPINE1,AHR,EGLN2,PEX6,CPA3,KLK12,PCYOX1,UBD,SAMD9L,CTSL,DLD,GAPDH,SMURF2,SFRP1,BACE2,CPS1,UFD1L,UBE2C,DPM2,ANPEP,SF3B3,UCHL1,TGM2,NRDC,UBE2K,PFN2,PSMD14,FAP,MMP1,DSC3,BMP1,ITGB1,CLN3,GNAQ,MMP10,OAZ2,PSMD8,HPN,PCSK2,TF,SREBF1,DERL1,ADAM10,SOX9,PLAU,CD81,VPS28,SMAD3,KLK14,SDC4,GPC3,ACHE,F2,CTSZ,IKBKB,CTSD,CYFIP2,TGFB1,LPL,XPO…
Free Radical Scavenging	8.45E-16-8.42E-12	AGER,XDH,PIK3R1,MUC1,SERPINA3,HBA1/HBA2,HEPH,NOS3,APOL6,ARNT,SOD2,ABCC1,TSC2,CYP2A6 (includes others),ITGB4,AHR,SFTPA1,NFE2L3,SLC2A1,YWHAZ,RRM2,ITGA5,ARHGDIB,CDH5,TFRC,ICAM1,PRDX1,TAC1,PRKCZ,SOD3,TGM2,CD47,HK2,DOK4,COL18A1,MMP1,PON3,ITGB1,CYP1A1,TXNIP,GSTA4,SH3BP5,ITGB2,FOS,TF,DHCR24,SREBF1,NR4A1,FBP1,CYCS,LDHA,MAOA,EEF1A2,SMAD3,GNB2L1,ACHE,F2,HMGB1,IKBKB,SCARB1,PIM1,TGFB1,ALDH3A2,UQCRFS1,JUND,GP…
Hereditary Disorder	2.04E-15-1.9E-11	PIK3R1,LRG1,MUC1,RRM2B,SERPINA3,ATP2A2,CCND1,FGG,IFIH1,CCND3,GPRC5C,BAIAP2,TSC2,SYPL1,B4GALT5,ITGB4,FBL,SLC2A1,EEF2,CSNK1D,TPM3,FGFR2,IGFBP5,VAMP2,ARHGDIB,PDLIM7,GAPDH,TMEM43,RPS6KA1,XRCC5,APOD,FHL1,NME1,GBP1,SCUBE2,KCNQ1,SMARCA4,LBR,TGM2,DUSP5,MAL2,GADD45A,EFTUD2,PFN2,PLOD2,PRKDC,MLF2,NRGN,ENG,FOS,HNF1B,GPI,TPI1,FLNC,IMPDH1,NR4A1,SOX9,LDHA,ID4,MT2A,VPS35,ATP2B1,EEF1A2,SMAD3,TSC22D3,MYC,TGFBR2,AK…
Post-Translational Modification	8.3E-15-8.3E-15	PMVK,AGER,PPP2CA,GAS6,XDH,PIK3R1,GSK3A,CCND1,PAK1,DYNLL1,CTDSP1,PHKB,CCND3,RARA,PLXNB2,AHR,DAPK1,CFL1,RALB,CSNK1D,ITGA6,FGFR2,ANXA2,RORC,ARAF,ZAK,CHKA,RPS6KA1,B3GNT5,CD34,DYRK2,CDK12,NME1,PRDX1,DUSP6,LRP6,PTN,CTDSPL,GALNT2,TAC1,FZD1,PRKCZ,EFNB2,CD47,YES1,ARRB1,IGF1R,RPS6KA2,MMP1,ITGB1,PRKDC,CLN3,TRIM28,MAPK6,ENG,CDK1,EFNA1,KITLG,ITGB2,CALM1 (includes others),CDC42BPA,TF,FAM129A,ADAM10,DVL3,SOX9,C…
Cardiovascular Disease	1.66E-14-2.57E-13	AGER,XDH,GCLC,GSK3A,MKI67,HBA1/HBA2,NOS3,LRPAP1,ATP2A2,FGG,SCNN1A,CXCL10,NCEH1,GAA,MGP,SERPINE1,AHR,CERS6,TKT,AKAP13,PCNA,SCNN1G,H2AFX,FGA,LRIG1,CPS1,ICAM1,ZFP36,GDF15,LRP6,VEGFB,PLXNA2,CD47,JUN,PLIN2,SCNN1B,COL18A1,PON3,EGR1,GREM1,GABRE,FOLR1,ITGB2,FOS,PCSK2,S100A9,IMPDH1,NR4A1,PLAU,DGAT1,SLC7A11,SMAD3,KLF6,SDC4,TUBB,F2,TGFBR2,HMGB1,IKBKB,SCARB1,TGFB1,LPL,ITGAV,LRP11,GCLM,JUP,ELN,TUBB3,PTPRM,KLF…
Carbohydrate Metabolism	3.37E-14-1.07E-11	AGER,TFF1,PIK3R1,MUC1,GCLC,GSK3A,GBP5,ATP2A2,NCEH1,SOD2,CCND3,BCAT2,GLB1,GPD2,IGFBP1,SERPINE1,TP53INP1,SLC2A1,FGFR2,IGFBP5,MYO1C,PRPS2,SCP2,GAPDH,ADIPOR2,STEAP3,EPHX1,APOD,DYRK2,AP2A1,ICAM1,PLA2G10,DPM2,HS2ST1,GDF15,CTHRC1,PLIN2,OAS1,PMM1,TXNIP,FUCA2,SLC35A2,GPI,PCSK2,TPI1,NR4A1,FBP1,MAN2B1,SFN,UGT1A6,EEF1A2,ABCA3,SMAD3,PDPK1,ACHE,SC5D,F2,TGFBR2,MYC,GGA2,SNRPN,CYP3A5,LECT1,TGFB1,LPL,GPR39,PGK1,CX…
Nervous System Development and Function	3.58E-14-8.95E-12	DPYSL2,MYH10,AGER,RRM2B,NPTX1,CCND1,SOD2,EIF4G2,GLB1,TSC2,BAIAP2,EXOC5,PLXNB2,SERPINE1,TNFRSF21,YWHAG,YAP1,LRP2,CRKL,CSNK1D,ITGA6,FGFR2,AGA,IGFBP5,MARCKS,BTG2,RPS6KA1,ANK3,ICAM1,GFRA3,PLA2G10,KCNQ1,PLXNA2,TAP1,SMARCA4,TGM2,YES1,CD47,CNTNAP2,ACTR3,NRDC,PFN2,KHDRBS1,VIM,HPN,LAMB2,SEMA3A,MARCKSL1,FOS,MAN2B1,ID4,MAOA,PRKACB,MT2A,YWHAH,SKI,ETV1,PDPK1,ACHE,RBP1,F2,TGFBR2,MYC,HMGB1,CTSD,RHOB,CPLX2,TGFB1…
Renal and Urological System Development and Function	4.9E-13-4.9E-13	ICAM1,MMP14,GNB2L1,CCL20,CA9,CXCL10,PTK2,NARS,SRSF1,PAK1,TFF2,TGFB1,EFNB1,SAA1,POSTN,CXCL1,RANBP9,AGT,ITGB1,SRC,CXCL8,PXN,FBLIM1,C3,NRAS,PTP4A3,RALB,PLAUR,L1CAM,ANXA2,EFNA1,CADM1,TLR2,ITGB2,PODXL2,PTPN11,PKD1,PLAU,FGA,CTTN,VIL1
DNA Replication, Recombination, and Repair	3.65E-12-3.65E-12	COL14A1,PIK3R1,SDC4,CCND1,F2,MYC,TGFBR2,PTK2,CXCL10,RASGRF1,LRAT,TGFB1,PIM1,TCEB3,TSC2,MYBL2,IGFBP1,TYMS,CXCL8,SMC3,STAT6,RBL2,PTPRE,FBLN5,GUCY1A3,RRAD,CDK6,ITGA5,IGFBP5,PTGDS,IRF1,TPSAB1/TPSB2,AKAP13,PCNA,ALOX15B,PTPN11,IL1RN,RAP1GAP,DUSP1,PML,EREG,IL6ST,PEBP1,RAP1B,RALA,PDGFA,MMP14,PTN,NTS,TAC1,SMARCA4,PRKCZ,HDGF,NFKBIA,ARRB1,JUN,CEBPA,IGF1R,ERBB2,MAPKAPK2,PIK3IP1,AGT,ITGB1,SRC,PXN,NRAS,HDAC1,P…
Hepatic System Development and Function	4.21E-12-4.21E-12	IL6ST,SMAD3,PIK3R1,XDH,MMP14,PTN,NTS,GPC3,CCND1,F2,ARNT,MYC,TGFBR2,IKBKB,TRIM24,NFKBIA,JUN,CCND3,TIMP1,TGFB1,RARA,ITGAV,IGF1R,CEBPA,SLC7A5,JUND,IGFBP1,STAT1,SULF2,DLC1,CITED2,AHR,PIK3IP1,AGT,ITGB1,C3,IL6R,FGFR2,MAPK9,FOXM1,KITLG,FOS,TF,IL1RN,TGFA,RXRA,PML,LGALS1
Cell Signaling	4.59E-12-4.59E-12	XDH,ASS1,PIK3R1,KLF6,PDPK1,CD46,NOS3,F2,PTK2,HSPA4,DYNLL1,SOD2,SCARB1,TGFB1,FASN,CPM,ABCC1,DDAH1,FOSL1,STAT6,TYK2,KLF4,TXNRD1,IRF1,TLR2,DUSP1,IL1RN,PRKCD,HSP90AA1,CD34,NOTCH1,TREM1,SFTPD,ICAM1,PLA2G10,CPD,SLC7A1,TNFAIP3,TAC1,NR3C1,HSP90B1,HLA-DRB1,NFKBIA,JUN,SST,STAT1,SPAG9,AGT,ITGB1,SRC,NQO1,G6PD,VWF,MAPK9,HSPD1,ITGB2,SEMA3A,CALM1 (includes others),S100A9,CAT,PLAU,CLU,WNT5A
Respiratory System Development and Function	4.69E-12-4.69E-12	CD81,KDM6B,ABCA3,SYNE1,NOS3,SC5D,CEBPG,SPRY4,NKX2-1,CTNNBIP1,FGFR3,HOXB3,ADGRF5,TGFB1,RARA,LPL,MGP,ITGB4,SERPINE1,SFTPA1,ELN,EGLN2,STAT6,RBL2,LRP2,CRKL,CREBBP,ITGA6,FGFR2,ANO1,MAPK8IP3,TLR2,PKD1,DUSP1,FOXA2,PTPRS,RXRA,AKAP12,SFTPC,LOX,PBX2,SFTPD,PDGFA,MMP14,NR3C1,ROBO1,TGIF1,AQP3,ARRB1,CEBPA,EGLN3,MMP12,CITED2,TK1,KRT14,EPAS1,MAPK9,FOS,SCGB1A1,LTBP3,B4GALT1,FLNC,DVL3,SFTPB,PLAU,DKK1,WNT5A,LGALS1
Reproductive System Development and Function	1.41E-11-3.25E-11	LOX,MYH10,PALLD,AGER,DUSP6,TFF1,PDPK1,EIF4EBP1,S100A7,PAK1,ELF3,TGFB1,IGF1R,KPNA2,SERPINB5,ITGB4,ERBB2,EYA2,AHR,ITGB1,SRC,PXN,SDC1,YAP1,VIM,LAMC2,MARCKSL1,CDC42BPA,BTG2,HOXB9

## Sheet: Supplemental Table 11
Â© 2000-2016 QIAGEN. All rights reserved.
Upstream Regulator	Exp Log Ratio	Molecule Type	Activation z-score	Target molecules in dataset
NFE2L2		transcription regulator	2.874	ABCC3,AKR1B10,CALB1,COL1A1,COL3A1,CXCL3,CXCL6,CXCL8,CYP4A22,EPHX1,FGF13,GCLC,GCLM,GPX2,GPX3,IL6,L1CAM,LY6E,NEUROD1,PFN2,S100P,SCG2,SEC23A,SERPINA3,SERPIND1,SLC7A11,SOD2,SQSTM1,SYT1,TXNRD1,UGT1A1,UGT1A6
KEAP1		transcription regulator	-1.702	GCLC,IL6,S100P,UGT1A1
CTNNB1		transcription regulator	4.427	ALDH1A1,BCL2L11,BIRC5,CA3,CCNE1,CDH2,CEBPA,CENPM,COL1A1,CTNNA2,CTNND2,CXCL8,CYP24A1,CYP2E1,CYP4F12,DIO1,DIO2,DKK1,EGFR,ENPP1,EPHB2,EYA2,FOSL1,FOXA2,FZD3,GATA3,GPX2,GREM1,HOXB7,IGFBP5,IGHM,ITGA6,KIF23,KIFC1,KLF5,KRT5,L1CAM,LAMC2,LGR5,LY6E,MMP1,MMP14,MMP15,MTMR7,MYC,NEUROD1,NKX2-1,NR0B1,PAX8,PITX2,QPCT,S100A8,SERPINA3,SERPINA5,SERPINE1,SNAI2,SOX9,SQSTM1,T,TFF1,TNFRSF11B,TNFSF11,TSPAN8,TWIST1,VCAN,W…
FOXM1	1.56	transcription regulator	4.343	BIRC5,CCNB1,CCNB2,CCNE1,CDC20,CDC25A,CDH2,CDK1,CENPA,CENPE,CENPF,ESR1,GTSE1,IL6,LOX,MUC5AC,MYC,NEK2,PLK4,SFTPB,SFTPD,SNAI2,TOP2A,TWIST1,VCAN
HIF1A		transcription regulator	3.8	ABCF2,ADM,AURKA,BIRC5,CA9,CD24,CDH2,CEMIP,CXCL3,CXCL8,CYP4F3,EGFR,FHL2,IGFBP5,IL6,IRS2,L1CAM,LOX,LOXL2,MET,MMP1,MUC1,MYC,PDK1,PLOD2,PMAIP1,SCG2,SERPINE1,SLC2A3,SOD2,SOX9,STC2,T,TMEM45A,TNFRSF11B,WT1
ESR1	1.47	ligand-dependent nuclear receptor	3.745	ABCA3,ABCC3,ANK3,AQP1,AQP3,ASPM,ATG13,ATP2A3,ATP2B1,AURKA,BCL2L11,BIRC5,BRCA2,BUB1,CALB1,CARD14,CCL20,CCNB1,CCNE1,CDCA8,CDK1,CEACAM6,CEBPA,CENPA,CENPE,CENPF,CENPM,CENPN,CEP135,COL5A2,CPE,CPM,CXCL1,CXCL3,CXCL8,CYP26B1,DST,DUSP4,EGFR,ESR1,EXOC5,FOLR1,FOSL1,FOXM1,GAL,GATA3,GJB3,GM2A,GREM1,GULP1,HACD1,HELLS,HMGA2,HOXC6,ICAM1,ID1,IGFBP5,IL6,IRS2,ISG20,ITGA6,KIF23,LMO3,MAD2L1,MALL,MAP3K13,MMP1,MPHOSPH9…
FOXO1		transcription regulator	3.736	ALDOB,ANGPT2,ASPM,BCL2A1,BCL2L11,BIRC5,CCL20,CCNB1,CCNB2,CDK1,CENPF,CTSV,CXCL8,DLGAP5,ELOVL6,FOXA2,FOXM1,ICAM1,IL6,IRS2,KIF11,KIF18A,MMP1,MYC,NCAPG,NEK2,NUSAP1,PBK,PCK1,SERPINB2,SERPINB5,SERPINE1,SOD2
STAT3		transcription regulator	3.666	ADM,ALDH1A1,ANGPT2,BCL2L11,BIRC5,CCL20,CCNB1,CCNE1,CDH2,CDK1,CEBPA,COL1A1,COL3A1,COL5A1,CX3CL1,CXCL3,CXCL6,CXCL8,CXCR2,DKK1,DPP4,ECT2,ESR1,F3,FFAR2,FGA,FGB,FOXM1,GATA3,ICAM1,IGFBP5,IL11,IL6,IL6R,ISG20,KRT17,LIF,MMP12,MUC1,MYC,NKX2-1,NR4A2,PCK1,PCSK1,PHLDA1,PLA2G2A,PMAIP1,SERPINA3,SERPINB3,SERPINB4,SERPINE1,SFTPB,SNAI2,SOD2,STC2,TNFSF11,TWIST1
E2F1		transcription regulator	3.661	ALPL,ANGPT2,AURKA,BCL2L11,BIRC5,CCNB1,CCNB2,CCNE1,CDC20,CDC25A,CDC45,CDC6,CDK1,CEBPA,DIRAS3,DUSP4,ECT2,EYA2,FOXM1,GINS1,GM2A,HELLS,ICAM1,IRS2,KIF23,MAD2L1,MCM10,MCM4,MMP1,MUC4,MYBL2,MYC,MYCN,NCOA3,NDC80,NUSAP1,PDK1,RAD51,RAD54L,RHOBTB2,RRM2,SERPINE1,SMARCB1,SOD2,TOP2A,TXNRD1,TYMS,UCK2
MYC	1.29	transcription regulator	3.627	ADM,ANGPT2,AQP1,ASCL1,BCL2A1,BIRC5,BUB1,CCNB1,CCNB2,CCNE1,CDC20,CDC25A,CDH2,CDK1,CEBPA,CGB3 (includes others),COL1A1,COL3A1,COL5A1,COL5A2,CTSV,CXCL8,DKK1,DUSP4,DUSP6,F3,FOSL1,FOXA2,FOXM1,GBX2,GCLC,GCLM,GGH,GLS2,GM2A,HMGA1,ICAM1,ID1,ITGA6,KRT17,KRT6B,LOC102724788/PRODH,LOX,MAD2L1,MRE11A,MUC5AC,MYC,MYCN,ODC1,PCK1,PDK1,PFKP,PITX2,PMAIP1,RAD51,RARRES1,RRM2,SERPINE1,SLC16A1,SLC2A3,SOD2,SOX9,SPRR3,T,TN…
CEBPB		transcription regulator	3.554	AKR1B10,AKR1C3,ALDH1A1,ANTXR1,BCL2A1,CCNB2,CCNE1,CDC25A,CDC45,CDC6,CEBPA,COL1A1,CPB2,CXCL5,CXCL8,CYP24A1,CYP2E1,HMGA1,ICAM1,ID1,IGKC,IL6,IRS2,KRT6B,MIA,MMP1,MMP10,MYC,ODC1,PCK1,PI3,RGS4,SAA2,SERPINB2,SFTPD,TLR8,TNFAIP6,TNFSF11,UGT1A6,VCAN
JUN		transcription regulator	3.523	ARTN,BCL2A1,BCL2L11,CA3,CDC20,CDK1,CHL1,COL1A1,CX3CL1,CXCL1,CXCL3,CXCL5,CXCL8,DICER1,DIO2,DKK1,EGFR,F3,FOSL1,FOXA2,GCLC,HMGA1,ICAM1,IL6,IRS2,KRT16,LIF,LPAR1,MET,MMP1,MMP10,MMP12,MYC,PCSK1,PTHLH,RASGRF1,SERPINB2,SERPINE1,SFTPD,SNAI2,SOD2,TFF1,TWIST1,UGT1A3
TBX2		transcription regulator	3.162	AURKA,BUB1,CCNB1,CDC6,CDCA3,CDK1,FOXM1,HELLS,MAD2L1,MCM4
E2F2		transcription regulator	3	BIRC5,CCNB1,CCNE1,CDC25A,CDC45,CDC6,CDK1,MCM10,MCM4,MYBL2,MYC,MYCN,RAD51,RRM2,SERPINE1
STAT4		transcription regulator	2.845	BCL2L11,CXCL3,GATA3,HLA-DQB1,ISG20,MYC,PDK1,PFN2,PKP2,PLOD2,RRAD,SCG5,SELENBP1,SERPINB5,SERPINE1,SLC2A3,STC2,TUBB2B,TWIST1
SMAD2		transcription regulator	2.781	BCL2L11,CDH2,IL6,IL6R,MET,MUC4,SERPINE1,SFTPB,SNAI2,TPM2
MYB		transcription regulator	2.777	ATP2B1,BIRC5,CCNB1,CCNE1,CDK1,DHRS2,GATA3,IGFBP5,MYC,SNAI2
JUNB		transcription regulator	2.747	CDC20,COL1A1,COL7A1,CXCL3,FOSL1,IL6,LPAR1,MMP1,MMP10,RASGRF1,SERPINB2,SERPINE1,SFTPD,SNAI2,SYT1,UGT1A3
HNF1A		transcription regulator	2.727	ADH1B,AKR1C1/AKR1C2,AKR1C3,ALDOB,APOH,AQP3,CCNE1,CD302,CDC45,COL3A1,CPB2,CYP2E1,DDC,DPP4,DUSP6,ELOVL2,FFAR2,FGA,FGB,FGL1,FOLR1,FOXA2,FXYD3,GPX2,HNF1B,HOPX,LRRC31,LY6E,MAGEA9/MAGEA9B,MUC4,NPC1L1,PAH,PCK1,PCSK1,PDK1,PFKP,PIGR,SERPINE1,TMPRSS2,TMPRSS4,UGT1A1,UGT1A7 (includes others),VIL1
MED1		transcription regulator	2.72	AURKA,BIRC5,CCNB1,CCNE1,CDC20,CDC6,CDK1,CEBPA,CENPA,CHAF1A,CYP24A1,CYP2B6,DIO1,FOXM1,INSM1,LIF,LY6D,MAD2L1,MET,MYC,MYCN,ODC1,STC2,TFF1
MYBL2	1.62	transcription regulator	2.707	BCL2L11,BIRC5,CCNB1,CCNB2,CDK1,CEBPA,ID1,IGFBP5,MYBL2,MYC,TOP2A
SMARCA4		transcription regulator	2.695	ANXA10,AZGP1,BCL2A1,BIRC5,CDC25A,CDC6,CLCA3P,COL7A1,CPM,CPS1,CTSH,CYP4B1,DUSP4,DUSP6,ELOVL6,EPHB2,F3,FFAR2,FHL2,FOLR1,FOXA2,GCAT,GCLC,GJB5,GULP1,HEPH,HLA-DRA,HMGA2,ICAM1,IGFBP5,IGHG1,IL11,IL6,LAMA3,LOX,LOXL2,MMP1,MUC1,MYC,PDK1,PITX2,PON3,PTHLH,RAB38,RRM2,S100A2,SCG5,SERPINB2,SERPINB5,SERPINB7,SERPINE1,SFTPB,SFTPC,SPANXD (includes others),SS18,TFF1,TNNC2,TRIM15,TSPAN8,TXNRD1,TYMS,UBD
RARA		ligand-dependent nuclear receptor	2.605	ALDH1A1,ASPM,ATG13,BIRC5,CALB1,CDK1,CEACAM6,CENPA,CENPF,CENPM,CENPN,GATA3,HELLS,HNF1B,HOXA1,IL6,IL6R,KIF23,LMO3,MAD2L1,MALL,MYC,MYCN,NCAPG,NCAPH,PBK,PCK1,PLK4,SAMD9,SFTPB,SLC7A11,TFF1
ERG		transcription regulator	2.538	ARFGEF2,CAMK1D,COL11A2,CXCL1,CXCL8,HMMR,ICAM1,ITGA6,MET,MMP1,MYCN,NR4A2,TMPRSS2
XBP1		transcription regulator	2.488	APBB2,CYP2E1,DNAJC10,ESR1,FKBP10,HLA-DRA,ICAM1,IL6,LMAN1,MYC,PDIA2,POU2AF1,SEC23A,TFF2,TNFSF11
STAT6		transcription regulator	2.454	ARNTL2,COL1A1,EPHX1,GATA3,IGHG1,IL6,IRS2,ISG20,LIF,MMP12,MMP14,MMP28,NCOA3,PLD1,SCN9A,SELENBP1,SERPINB3,SERPINB4,SERPINE1,SQSTM1,TFF3,TNFSF11
CCND1		transcription regulator	2.447	AQP3,ASPM,AURKA,AZGP1,BIRC5,CCNE1,CDC45,CDC6,CDCA8,CENPF,CENPN,CEP55,COL1A1,COL5A2,CTNNA2,EGFR,FOXM1,HJURP,KIF11,MCM10,MCM4,MELK,MYC,NCAPH,PAH,RAB3B,RAD51,RRM2,SCG5,SELENBP1,TAPT1,TMPRSS2,TPX2,TYMS
CREB1		transcription regulator	2.446	ACHE,ADM,AK4,CALCB,CAMK1D,CDA,CDH13,CDH2,CRYM,CTNNA2,CXCL8,DIO2,DOK4,FGF13,GAL,HLA-DQB1,HLA-DRA,ID1,IL6,IRS2,KCND2,KLF5,MMP1,MUC5AC,MUC5B,MYC,NEUROD1,NKX2-1,NR4A2,PAX8,PCK1,PCSK1,RASGRF1,RPRM,SCG2,SFTPB,SLC16A1,SLC2A3,SOD2,SQSTM1,STC1,TNFSF11
RELA		transcription regulator	2.444	BCL2A1,BIRC5,BRCA2,CCL20,COL1A1,CX3CL1,CXCL1,CXCL3,CXCL5,CXCL6,CXCL8,CYP2B6,DIO2,F3,GDF15,ICAM1,IGHG1,IGHM,IGKC,IL6,LGR5,MIA,MMP1,MUC1,MYC,PCK1,PI3,PLD1,SAA2,SLC2A5,SOD2,SOX9,TNFRSF11B,TWIST1,UGT1A1,WT1
ASCL1	2.46	transcription regulator	2.433	BIRC5,CDK1,DLL3,FOXM1,ID1,INSM1,NEUROD1,PAX8,ZMAT4
SMAD4		transcription regulator	2.429	ANGPT2,CCL20,CCNE1,CDH2,COL7A1,EGFR,HMGA2,ID1,IRAK3,ITGA6,LOC102724788/PRODH,LPAR1,MET,MMP1,MUC4,MYC,MYCN,SERPINE1,SFTPB,SNAI2,TNFAIP6,TPM2
NR5A1		ligand-dependent nuclear receptor	2.403	ANGPT2,C4A/C4B,CYP26B1,GAL,NR0B1,SOX9,VNN1
SOX9	1.44	transcription regulator	2.4	CDH2,COL1A1,CYP26B1,MIA,SNAI2,SOX9,VNN1
KLF6		transcription regulator	2.381	BCL2L11,CDH2,CGB3 (includes others),COL1A1,CXCL8,MSLN,MYC,PMAIP1
KMT2A		transcription regulator	2.236	HOXB7,HOXC6,MYC,PBX1,RGS4,TFF1,ZMAT4
E2F3		transcription regulator	2.231	AKR1C1/AKR1C2,AKR1C3,BIRC5,CA12,CCL20,CCNB1,CCNE1,CDC25A,CDC45,CDC6,CDCA3,CDK1,CXCL1,MAD2L1,MCM10,MCM4,MYBL2,MYC,MYCN,RAD51,RRM2,S100A8,SERPINE1,TPX2,WFDC2
ATF4		transcription regulator	2.207	CA9,GDF15,IGFBP5,IL6,PCK1,PMAIP1,SNAI2,STC2,TNFRSF11B,TNFSF11
KLF5	1.35	transcription regulator	2.2	BIRC5,CDK1,KLF5,KRT5,MYC
YAP1		transcription regulator	2.143	BCL2L11,BIRC5,CDK1,DICER1,EGFR,FOXM1,ID1,MSLN,MYC,NEK2,PMAIP1,RAD51,SNAI2,SOX9
SP1		transcription regulator	2.031	ALOX15B,ALPL,ATP2A3,BACE2,BIRC5,CCL20,CDH2,CDK1,CEBPA,CGB3 (includes others),CHRNA5,COL1A1,COL7A1,CXCL3,CXCL5,CXCL8,EGFR,ESR1,F3,FOSL1,FOXM1,FPR2,GDF15,HMGA1,ICAM1,KRT16,KRT81,MAOA,MET,MMP1,MMP14,MUC4,MUC5AC,MUC5B,MYBL2,MYC,MYCN,NCOA3,NPR1,PCK1,PDK1,PMAIP1,SCTR,SERPINE1,SLC2A3,SLC39A8,SLC4A7,SOD2,SOX9,SPTB,TFF1,TNFSF11,TXNRD1,TYMS,UGT1A7 (includes others)
NKX2-3		transcription regulator	1.996	ADM,ALPL,ANGPT2,CCNB2,CEP55,CX3CL1,CXCL8,GDF15,HMMR,HOXD1,KRT81,LY6E,PLD1,PMAIP1,POSTN,SAMD9,SNCAIP,TFF3,TMEM158
HMGB1		transcription regulator	1.983	CCL20,CXCL3,CXCL5,CXCL8,FGL1,HLA-DRB1,ICAM1,IL6,MIA,MMP1,PLA2G2A,TNFSF11
ATF2		transcription regulator	1.982	BCL2A1,IL6,MMP1,PCK1,SERPINB5,SNAI2,SOD2
ETV4		transcription regulator	1.977	CXCL8,KRT5,MMP14,MUC4,TWIST1
TWIST2		transcription regulator	1.969	CD24,CDH2,POSTN,SNAI2,TWIST1
FOSB		transcription regulator	1.969	CEBPA,FOSL1,MMP1,SERPINB2,SERPINE1
TGIF1		transcription regulator	1.966	CXCL1,CXCL3,CXCL8,IL6
TCF4		transcription regulator	1.96	BIRC5,CD24,CDH17,DKK1,MIA,MYC,PITX2,SOX9,SQSTM1,VCAN
SIRT1		transcription regulator	1.935	BIRC5,CDH2,DKK1,ESR1,ICAM1,ID1,IL6,KIF5C,MAOA,MYC,PC,PCK1,SERPINE1,SLC7A11,SOD2,TNFSF11
EPAS1		transcription regulator	1.934	ABCF2,ADM,ANGPT2,CA12,CA9,CEMIP,CKMT1A/CKMT1B,EGFR,FMO5,IGFBP5,IL6,IRS2,L1CAM,LOX,LOXL2,MMP14,PLOD2,SERPINE1,SFTPB,SFTPD,SLC2A3,SLC6A8,SOD2,SOX9,STC2,TMEM45A,TNFRSF11B
GLI1		transcription regulator	1.934	ASPM,CD24,COL1A1,DIO2,DKK1,FOXA2,FOXM1,IL1R2,IL6,MUC5AC,MYCN,PTHLH,S100A7,SOX9,SYNE1,TFF1,VIL1
BMPR1A		kinase	1.932	BMPR1B,ID1,SERPINE1,SOX9
MTPN		transcription regulator	1.914	CEBPA,COL1A1,DDC,IL6,MYC,S100A8,SERPINE1
ETS1		transcription regulator	1.817	ATP2A3,CCNE1,CYP24A1,FOXD1,GABRE,ICAM1,IGF2BP3,MMP1,MUC4,MYC,NPR1,PTHLH,SERPINE1,TWIST1,TYMS
NFKB1		transcription regulator	1.773	BCL2A1,BRCA2,CCL20,COL1A1,CX3CL1,CXCL3,CXCL8,DICER1,EGFR,GATA3,ICAM1,IGHG1,IGHM,IGKC,IL6,KRT6B,MMP10,MYC,PI3,SOD2,SOX9,WT1
AR		ligand-dependent nuclear receptor	1.718	ADM,AKR1C3,ALDH1A1,ALOX15B,AQP3,AZGP1,BIRC5,BUB1,C4A/C4B,CALCB,CDH2,CENPE,CLDN3,CLGN,COL3A1,EGFR,ELK4,ELOVL2,EPHX1,ESPL1,FXYD3,GDF15,IGFBP5,IL6,ITGA6,LMAN1,MAD2L1,MAOA,MCM4,MSMB,MUC1,MYC,NEK2,NR0B1,NUSAP1,ODC1,PIGR,PLOD2,PMAIP1,PSCA,PTHLH,RARRES1,SERPINB5,SERPINE1,SLC2A3,SLC39A8,SLC7A11,SNAI2,SOX9,TFF1,TFF3,TMEM158,TMPRSS2,TNFSF11,TPX2,TSPAN8,TWIST1,VCAN,VCL,WT1
NEUROG3		transcription regulator	1.709	CDH2,CTSV,NEUROD1,NKX2-1,PCSK1,SNAI2
EHF		transcription regulator	1.703	CCL20,CDK1,FCER1A,MET,MMP1,MUC1,S100A7,S100A8,SAA2,SERPINA3,SERPINE1,SPRR3,VNN1
EGR2		transcription regulator	1.667	CALCB,COL11A1,DIO2,GATA3,IL1R2,IL6R,MR1,PTHLH,RRAD,SLC16A1,TNFSF11
MUC1	-1.449	transmembrane receptor	1.606	ALDH1A1,CXCL8,HLA-DRA,IL6,SNAI2,SOD2
SNAI1		transcription regulator	1.589	CDH2,CLCA2,CLDN3,COL1A1,CXCL8,FOSL1,ID1,KRT17,L1CAM,MUC1,PFKP,SNAI2,TMOD3,TWIST1,VILL
CALR		transcription regulator	1.536	CDH2,CEBPA,COL1A1,ICAM1,VCL
GLI2		transcription regulator	1.526	CDC45,CDK1,CXCL3,CXCL6,CXCR2,FOXA2,GATA3,IL6,KRT17,MYC,MYCN,PI3,PTHLH,SOX9
PPRC1		transcription regulator	1.521	CCL20,CHRNA9,CXCL8,GDF15,PHLDA1
NKX2-1	-1.818	transcription regulator	-1.51	ADGRF5,AQP1,BCL2A1,CEBPA,CHIA,CHRNA5,DIO2,FXYD3,GJB3,HELLS,LMO3,MIA,PC,PFN2,PLA2G1B,RAD51,ROS1,RRM2,SERPINE1,SFTPB,SFTPC,SFTPD,SLC34A2,SNAI2,TFF2,TFF3,UGT8
COMMD3-BMI1		transcription regulator	-1.633	CCNE1,HOXA1,HOXB7,HOXC6,IGF2BP3,POU2AF1
SMAD6		transcription regulator	-1.795	IL6,PCK1,SERPINE1,SOX9
IRF4		transcription regulator	-1.826	ALPL,CCL20,CCNB1,CDK1,CX3CR1,CXCL3,GATA3,IL6,MYC,RAD51
HNF4A		transcription regulator	-1.827	ABCC3,ABCC6,ADGRB1,ADH1B,AKR1C1/AKR1C2,AKR1C3,ALDH1A1,ALDH5A1,ALDOB,APOH,AQP1,AQP3,ASCL1,C4A/C4B,CACNA2D2,CCNB1,CCNE1,CDC25A,CDC45,CDC6,CDK1,CEBPA,CLDN3,CPB2,CTAG1A/CTAG1B,CUL5,CXCL3,CYP2B6,CYP2E1,CYP4F3,DNAJB4,DSC2,DUSP6,EPHX1,EPS8L3,ETNPPL,FEM1B,FGA,FGB,FGF13,FIGF,FKBP10,FOXA2,FZD3,GABRE,GBX2,GDF15,GINS2,GPLD1,GPX2,HNF1B,ITGA6,KRT17,LGR5,MAOA,MIS18BP1,MSMB,MST1,MUC4,MYC,NCOA3,NDC80,NPC1L1,NR1I2…
RBL1		transcription regulator	-1.881	BCL2L11,CCNE1,CDC25A,CDC6,CDK1,F3,MCM10,MET,MYBL2,MYC,MYCN,NEK2,RRM2,TYMS
SMARCB1	1.36	transcription regulator	-1.892	AURKA,BCL2L11,C4A/C4B,CCNE1,CDC6,CDK1,CENPA,CENPE,COL1A1,COL5A2,CYP2E1,DSC2,KIF11,KIF23,MCM10,MCM4,MMP1,MYBL2,MYC,PC,PCK1,PLK4,POSTN,RAB3B,RAD51AP1,RAD54B,SMARCB1,TFF1
NR5A2		ligand-dependent nuclear receptor	-1.954	ABCC3,FGB,FOXA2,GLS2,ICAM1,IL6,MYC,NR0B1,NR1I2,RGS4
CTCF		transcription regulator	-1.964	CTAG1A/CTAG1B,HLA-DQB1,HLA-DRB1,MUC5AC,MUC5B,MYC
ELF5		transcription regulator	-1.964	CCNB1,ESR1,GATA3,MSMB,SNAI2
SPDEF		transcription regulator	-1.97	CDH2,COL1A1,COL5A1,COL5A2,EGFR,ITGA6,MUC5AC,SERPINB5,SERPINE1,SNAI2,SQSTM1
SKI		transcription regulator	-1.998	CDC25A,MUC4,ODC1,SERPINE1
GLIS2		transcription regulator	-2	COL1A1,MMP14,SERPINE1,SNAI2
SOX7		transcription regulator	-2	ASCL1,GBX2,KRT17,SPRR3
RAD21		transcription regulator	-2	HLA-DQB1,HLA-DRA,HLA-DRB1,MYC
ATF3		transcription regulator	-2.158	AURKA,CCNE1,CDK1,ID1,IL6,MMP1,NEK2,PCK1,SERPINB5,SERPINE1
CIITA		transcription regulator	-2.169	COL1A1,HLA-DPA1,HLA-DQB1,HLA-DRA,HLA-DRB1,SLC26A3
MXI1		transcription regulator	-2.2	CCNB1,FOXM1,MYC,MYCN,ODC1
E2F6		transcription regulator	-2.236	CCNE1,CDC25A,CDC45,CDC6,GINS2,MYC,RAD51,RAD51AP1,RRM2,SERPINE1
GATA6		transcription regulator	-2.357	ASCL1,C4A/C4B,FOXA2,GBX2,HBA1/HBA2,HNF1B,KRT17,LGR5,SFTPC,SPRR3
MEOX2		transcription regulator	-2.429	CCL20,CXCL1,CXCL3,CXCL6,CXCL8,F3,ICAM1,ID1,IL6,MMP10,MMP14
KLF2		transcription regulator	-2.476	ADM,ANGPT2,CDH2,CEBPA,CXCL8,F3,ID1,IL6,MMP14,MYC,PLOD2,PTHLH,SERPINE1,SFTPD,SOX9
TCF3		transcription regulator	-2.53	AURKA,AZGP1,BCL2L11,BIK,BUB1,CCNB1,CCNB2,CCNE1,CDC45,CHRNA5,COL1A1,CTSV,ECT2,GATA3,GM2A,GPLD1,IGHM,INSM1,KIF11,MAD2L1,MUC16,MYC,MYCN,NEUROD1,NUSAP1,PFKP,PLK4,POU2AF1,PRSS3,TMEFF1,TOP2A,TTK,TYMS
RB1		transcription regulator	-2.876	ALPL,ANGPT2,BCL2L11,BIRC5,CCNB1,CCNE1,CDC25A,CDC6,CDK1,CEBPA,CHAF1A,CLDN3,DIO2,F3,ID1,IL6,MCM10,MCM4,MELK,MET,MYBL2,MYC,RAD51,RAD51AP1,RRM2,SERPINE1,SH3BP2,SOD2,T,TNNC2,TYMS
CBX5		transcription regulator	-3.3	AKR1C3,BIRC5,CD24,CDC25A,CDC6,CDH17,CEMIP,CXCL5,MUC13,PCP4,PPFIBP2,QPCT,S100P,SCG5,SELENBP1,SERPINA3,SLC2A3,TFF3,TRIM31,TSPAN8
KDM5B		transcription regulator	-3.507	AURKA,CCNB1,CCNE1,CDCA3,CDK1,DLGAP5,ECT2,ESR1,GAL,HACD1,HMMR,NCAPH,NDC80,PBK,SOX9,SS18,T,TOP2A,TTK
